# Supplementary material for: Recent strategies for constructing hierarchical multicomponent nanoparticles/metal–organic framework hybrids and their applications
Source: Royal Society of Chemistry journal article supplement (doi:10.1039/d3na00213f), 2023-01-01
Supplement: d3na00213f1.pdf [file d3na00213f1.pdf]

## Supporting Information

### Access to and reactions of P-functional 1,4-dihydro-1,4-diphosphinines being fused to two TTF units

Shahriar Kermanshahian,<sup>a</sup> Tim Kalisch,<sup>a</sup> Zsolt Kelemen,<sup>b</sup> Gregor Schnakenburg,<sup>a</sup> László Nyulászi,<sup>\*b</sup> René T. Boéré<sup>\*c</sup> and Rainer Streubel<sup>\*a</sup>

<sup>a</sup>Institut Für Anorganische Chemie, Rheinische Friedrich-Wilhelms-Universität Bonn, Bonn (Germany). E-mail: [r.streubel@uni-bonn.de](mailto:r.streubel@uni-bonn.de)

<sup>b</sup>Department of Inorganic and Analytical Chemistry, Budapest University of Technology and Economics, Budapest (Hungary). E-mail: [nyulaszi@mail.bme.hu](mailto:nyulaszi@mail.bme.hu)

<sup>c</sup>Department of Chemistry and Biochemistry, University of Lethbridge, Lethbridge (Canada). E-mail: [boere@uleth.ca](mailto:boere@uleth.ca)

## Contents

|                                         |             |
|-----------------------------------------|-------------|
| <b>Experimental</b> .....               | <b>S3</b>   |
| <b>NMR Spectra</b> .....                | <b>S19</b>  |
| <b>Cyclic voltammetry studies</b> ..... | <b>S64</b>  |
| Cyclic voltammograms .....              | S66         |
| Scan rate dependency studies .....      | S78         |
| <b>Crystallographic data</b> .....      | <b>S82</b>  |
| <b>Theoretical calculations</b> .....   | <b>S94</b>  |
| Frontier molecular orbitals .....       | S94         |
| Details of DFT calculations .....       | S100        |
| <b>References</b> .....                 | <b>S127</b> |

## Experimental

### General procedure

All reactions and manipulations were carried out under an atmosphere of deoxygenated (preheated BTS catalyst at 100–130 °C) and dried (phosphorus pentoxide and silica gel) argon gas, using standard Schlenk techniques or glove box techniques with conventional glassware. All air and/or moisture sensitive chemicals were stored in either Schlenk flasks/tubes or handled in the glovebox. Solvents were dried and distilled according to standard procedures<sup>1</sup> and were used freshly from distills. Tetrathiafulvalene (**1a**)<sup>2</sup>, 2-(1,3-Dithiol-2-ylidene)-4,5-dimethyl-1,3-dithiole (**1b**)<sup>3,4</sup> and 2-(1,3-Dithiol-2-ylidene)-4,5-dipropyl-1,3-dithiole (**1c**)<sup>3</sup> were synthesised following the literature protocol. Also chloro(diethylamino)phenylphosphine **2a**<sup>5</sup> and bis(diethylamino)chlorophosphane **2b**<sup>6</sup> were synthesised and distilled before use and were stored under argon atmosphere. The progress of all reactions was monitored via <sup>31</sup>P{<sup>1</sup>H} NMR spectroscopy. NMR spectra of all the compounds were recorded on Bruker Avance DMX-300, DPX-300, DPX-400 or DMX-500 spectrometers. Deuterated solvent (CDCl<sub>3</sub>) were dried using literature procedures and used for the multinuclear NMR characterizations. The chemical resonances are given relative to the residual protons of the deuterated solvents (<sup>1</sup>H, <sup>13</sup>C) or 85% H<sub>3</sub>PO<sub>4</sub> (<sup>31</sup>P NMR). All the measurements were recorded at 298K unless some specific temperature is given. HSQC and HMBC experiments were used for purpose of assigning the <sup>1</sup>H NMR and <sup>13</sup>C NMR signals of all compounds. The melting points (or decomposition temperatures) were recorded on a Büchi 535 Type S melting point apparatus, where the samples were placed inside both-sided closed glass capillary tubes; the values are not corrected. The samples for the elemental analyses were prepared in a tin or silver (for halogen containing compounds) boat using a glove box. Elemental analyses were performed using an elementary vario EL analytical gas chromatograph. The mean values of three or four independent measurements are given in each case. Despite considerable effort, EA agreement remained poor, which probably reflects that column chromatography could not be performed with full efficiency. Importantly, the CDCl<sub>3</sub> NMR purity is high for most compounds. Electron ionization mass spectra were recorded on a MAT 95 XL Finnigan using EI (70 eV). For ESI mass spectra a Thermo Fisher Scientific Orbitrap XL Mass spectrometer was used. LIFDI mass spectra were recorded on a Thermo Finnigan MAT 90 sector instrument equipped with a LIFDI ion source (Linden CMS). MALDI mass spectra were acquired from a

Bruker Daltonik ultrafleXtreme TOF/TOF time-of-flight spectrometer. Only selected data are given for the detected ions (mass to charge ratio, relative intensity in percent). Single crystals were grown by evaporation of saturated solutions of the compounds or by diffusion technique. After crystal growing the single crystals were separated from the supernatant solution and were covered with fomblin for protection from further decomposition. A suitable single crystal was selected under the microscope and loaded onto the diffractometer. The crystallographic data were collected on Bruker D8-Venture diffractometer, Bruker X8-KappaApexII, Bruker APEX-II CCD, Nonius KappaCCD or STOE IPDS 2T diffractometer equipped with a low-temperature device at 100.0 K using graphite monochromated Cu-K $\alpha$  radiation ( $\lambda = 1.54178 \text{ \AA}$ ) or Cu-K $\alpha$  radiation ( $\lambda = 1.54178$ ). The structures were solved by Patterson methods or Direct Methods (SHELXS-97)<sup>7,8</sup> and refined by full-matrix least squares on F2 (SHELXL-97).<sup>8,9</sup> All non-hydrogen atoms were refined anisotropically, the hydrogen atoms were included isotropically using the riding model on the bound carbon atoms. Data analyses and the picture preparation of the molecular structure for all the compounds were done using the Olex-2 program. CCDC 2087015-2087016 and 2252852-2252853 contain the supplementary crystallographic data (see ESI p.34).

### Synthesis of C-Phosphanylated tetrathiafulvalenes **3a–f**

**1** was dissolved in dry THF in a Schlenk flask and cooled to  $-95 \text{ }^\circ\text{C}$ . A solution of LDA (1.05 eq for **1a,b**, 1.1 eq for **1c–f**) in dry THF was prepared and cooled to  $-95 \text{ }^\circ\text{C}$ , then added dropwise to the TTF's solution and the reaction mixture was stirred for 90 minutes (**1a,b**), 3 hours (**1c,d**) or 105 minutes (**1e,f**). During this time temperature was kept between  $-95 \text{ }^\circ\text{C}$  and  $-75 \text{ }^\circ\text{C}$ . Then **2a,b** (1.05–1.1 eq) was added dropwise ( $T = -95 \text{ }^\circ\text{C}$ ) and the reaction mixture was warmed up slowly and stirred for 3 hours. Then the solution was concentrated in *vacuo* ( $8 \times 10^{-3}$  mbar) and the residue was taken up in dry dichloromethane and filtered over a 3G-frit having a celite<sup>®</sup> pad and silica gel to remove the formed lithium chloride. The filtrate was collected and the solvent was removed in *vacuo* ( $8 \times 10^{-3}$  mbar) and then dried. In the case of **3a** and **3b** the residue was subjected to a low temperature column chromatography to remove doubly substituted side-products. The unreacted TTF was partially removed via sublimation using an ultrahigh vacuum pump ( $1 \times 10^{-5}$  mbar). However, in these cases the pure product couldn't be obtained.

#### 4-Diethylamino(phenyl)phosphanyl-2,2'-bis(1,3-dithiolyli-dene) (**3a**)

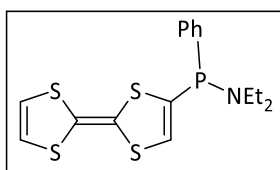

Product: Orange-yellow oil of the raw product (content of **3a**: 82%),  $^1\text{H}$  NMR (500.1 MHz,  $\text{CDCl}_3$ ):  $\delta$  = 1.09 (*t*, 6H,  $^3J_{\text{H,H}}$  = 7.0 Hz, N-CH<sub>2</sub>-CH<sub>3</sub>), 3.12 (*m*, 4H, N-CH<sub>2</sub>-CH<sub>3</sub>), 6.28 and 6.30 (*d*, 2H,  $^3J_{\text{H,H}}$  = 6.4 Hz, C<sup>4'</sup>,C<sup>5'</sup>-H), 6.31 (*s*, s.m.), 6.63 (*d*, 1H,  $^3J_{\text{P,H}}$  = 9 Hz, C<sup>5</sup>-H), 7.31 (*m*, 1H, *para*-C<sub>6</sub>H<sub>5</sub>), 7.37 (*m*, 2H, *meta*-C<sub>6</sub>H<sub>5</sub>), 7.43 (*m*, 2H, *ortho*-C<sub>6</sub>H<sub>5</sub>).  $^{13}\text{C}$  NMR (125.8 MHz,  $\text{CDCl}_3$ ):  $\delta$  = 14.5 (*d*,  $^3J_{\text{P,C}}$  = 3.4 Hz, N-CH<sub>2</sub>-CH<sub>3</sub>), 44.6 (*d*,  $^2J_{\text{P,C}}$  = 15 Hz, N-CH<sub>2</sub>-CH<sub>3</sub>), 109.8 and 112.6 (*s*, C<sup>2</sup>,C<sup>2'</sup>), 119.1 and 119.2 (*s*, C<sup>4'</sup>and C<sup>5'</sup>), 119.3 (*s*, s.m.), 127.5 (*d*,  $^2J_{\text{P,C}}$  = 42 Hz, C<sup>5</sup>), 128.5-128.6 (*para*, *meta*-C<sub>6</sub>H<sub>5</sub>), 130.7 (*d*,  $^2J_{\text{P,C}}$  = 18 Hz, *ortho*-C<sub>6</sub>H<sub>5</sub>), 138.4 (*d*,  $^1J_{\text{P,C}}$  = 13.2 Hz, *ipso*-C<sub>6</sub>H<sub>5</sub>), 138.6 (*d*,  $^1J_{\text{P,C}}$  = 48.2 Hz, C<sup>4</sup>).  $^{31}\text{P}\{^1\text{H}\}$  NMR (202.5 MHz,  $\text{CDCl}_3$ ):  $\delta$  = 52.9 (*s*).  $^{31}\text{P}$  NMR (202.5 MHz,  $\text{CDCl}_3$ ):  $\delta$  = 52.9 (*m*). MS (EI, 70 eV): *m/z* (%) = 415 (38) [ $\text{M}+\text{O}_2$ ]<sup>+</sup>, 383.1 (88) [ $\text{M}$ ]<sup>+</sup>, 312 (34) [ $\text{M}-\text{NEt}_2+\text{H}$ ]<sup>+</sup>, 204 (25) [ $\text{M}-\text{PPh}(\text{NEt}_2)+\text{H}$ ]<sup>+</sup>, 180 (54) [ $\text{PPh}(\text{NEt}_2)$ ]<sup>+</sup>, 109 (38) [ $\text{P}-\text{C}_6\text{H}_5+\text{H}$ ]<sup>+</sup>. HR-MS: Calculated: 383.0059, Found: 383.0058.

#### 4-Bis(diethylamino)phosphanyl-2,2'-bis(1,3-dithiolyli-dene) (**3b**)

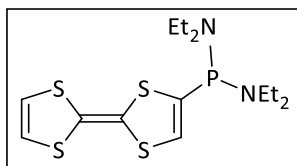

product: Yellow-orange oil of the raw product (content of **3b**: 78%).  $^1\text{H}$  NMR (500.1 MHz,  $\text{CDCl}_3$ ):  $\delta$  = 1.08 (*t*, 12H,  $^3J_{\text{H,H}}$  = 7.2 Hz, N-CH<sub>2</sub>-CH<sub>3</sub>), 3.10 (*m*, 8H, N-CH<sub>2</sub>-CH<sub>3</sub>), 6.10 (*d*, 1H,  $^3J_{\text{P,H}}$  = 1.7 Hz, C<sup>5</sup>-H), 6.28 and 6.29 (*d*, 2H,  $^3J_{\text{H,H}}$  = 6.5 Hz, C<sup>4'</sup>,C<sup>5'</sup>-H), 6.31 (*s*, s.m.).  $^{13}\text{C}$  NMR (125.8 MHz,  $\text{CDCl}_3$ ):  $\delta$  = 14.7 (*d*,  $^3J_{\text{P,C}}$  = 3.3 Hz, N-CH<sub>2</sub>-CH<sub>3</sub>), 42.9 (*d*,  $^2J_{\text{P,C}}$  = 17.7 Hz, N-CH<sub>2</sub>-CH<sub>3</sub>), 109 and 113.4 (*s*, C<sup>2</sup>,C<sup>2'</sup>), 119.1 (*d*,  $^2J_{\text{P,C}}$  = 17.9 Hz, C<sup>5</sup>), 119.3 and 119.4 (*s*, C<sup>4'</sup>and C<sup>5'</sup>), 119.5 (*s*, s.m.), 140.3 (*d*,  $^1J_{\text{P,C}}$  = 18.3 Hz, C<sup>4</sup>).  $^{31}\text{P}\{^1\text{H}\}$  NMR (202.5 MHz,  $\text{CDCl}_3$ ):  $\delta$  = 84.4 (*s*).  $^{31}\text{P}$  NMR (202.5 MHz,  $\text{CDCl}_3$ ):  $\delta$  = 84.4 (*m*). MS (EI, 70 eV): *m/z* (%) = 410 (8) [ $\text{M}+\text{O}_2$ ]<sup>+</sup>, 378.1 (6) [ $\text{M}$ ]<sup>+</sup>, 204 (100) [ $\text{M}-\text{P}(\text{NEt}_2)_2+\text{H}$ ]<sup>+</sup>. HR-MS: Calculated: 378.0481, Found: 378.0480.

#### 4-Diethylamino(phenyl)phosphanyl-4',5'-dimethyl-2,2'-bis(1,3-dithiolylidene) (3c)

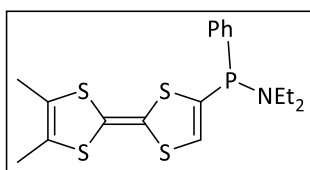

Product: Orange oil, Yield: 427 mg (1.04 mmol, 80%).  $^1\text{H}$  NMR (400.1 MHz,  $\text{CDCl}_3$ ):  $\delta$  = 1.08 (*t*, 6H,  $^3J_{\text{H,H}} = 7.3$  Hz, N-CH<sub>2</sub>-CH<sub>3</sub>), 1.92 and 1.93 (*br*, 6H, C<sup>4'</sup>, C<sup>5'</sup>-Me), 3.10 (*m*, 4H, N-CH<sub>2</sub>-CH<sub>3</sub>), 6.61 (*d*, 1H,  $^3J_{\text{P,H}} = 8.9$  Hz, C<sup>5</sup>-H), 7.30 (*m*, 1H, *para*-C<sub>6</sub>H<sub>5</sub>), 7.36 (*m*, 2H, *meta*-C<sub>6</sub>H<sub>5</sub>), 7.42 (*m*, 2H, *ortho*-C<sub>6</sub>H<sub>5</sub>).  $^{13}\text{C}$  NMR (100.6 MHz,  $\text{CDCl}_3$ ):  $\delta$  = 13.8 (*s*, C<sup>4'</sup>, C<sup>5'</sup>-Me), 14.5 (*d*,  $^3J_{\text{P,C}} = 3.5$  Hz, N-CH<sub>2</sub>-CH<sub>3</sub>), 44.6 (*d*,  $^2J_{\text{P,C}} = 14.9$  Hz, N-CH<sub>2</sub>-CH<sub>3</sub>), 108.4 and 111.7 (*s*, C<sup>2</sup>, C<sup>2'</sup>), 122.9 and 123.1 (*s*, C<sup>4'</sup> and C<sup>5'</sup>), 127.6 (*d*,  $^2J_{\text{P,C}} = 42.2$  Hz, C<sup>5</sup>), 128.4-128.5 (*para*, *meta*-C<sub>6</sub>H<sub>5</sub>), 130.7 (*d*,  $^2J_{\text{P,C}} = 18.1$  Hz, *ortho*-C<sub>6</sub>H<sub>5</sub>), 138.4 (*d*,  $^1J_{\text{P,C}} = 39.1$  Hz, C<sup>4</sup>), 138.6 (*d*,  $^1J_{\text{P,C}} = 22.2$  Hz, *ipso*-C<sub>6</sub>H<sub>5</sub>).  $^{31}\text{P}\{^1\text{H}\}$  NMR (162.0 MHz,  $\text{CDCl}_3$ ):  $\delta$  = 52.9 (*s*).  $^{31}\text{P}$  NMR (162.0 MHz,  $\text{CDCl}_3$ ):  $\delta$  = 52.9 (*m*). MS (EI, 70 eV): *m/z* (%) = 411 (27) [M]<sup>+</sup>, 339.9 (8) [M-NEt<sub>2</sub>+H]<sup>+</sup>, 231.9 (54) [M-PPh(NEt<sub>2</sub>)+H]<sup>+</sup>. HR-MS: Calculated: 411.0372, Found: 411.0368. EA (%): Calculated/Found C: 52.53/51.15, H: 5.39/5.67, N: 3.40/2.92, S: 31.16/28.90.

#### 4-Bis(diethylamino)phosphanyl-4',5'-dimethyl-2,2'-bis(1,3-dithiolylidene) (3d)

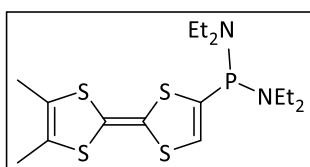

Product: Orange oil, Yield: 579 mg (1.4 mmol, 50%).  $^1\text{H}$  NMR (400.1 MHz,  $\text{CDCl}_3$ ):  $\delta$  = 1.07 (*t*, 12H  $^3J_{\text{H,H}} = 7.1$  Hz, N-CH<sub>2</sub>-CH<sub>3</sub>), 1.93 (*s*, 6H, C<sup>4'</sup>, C<sup>5'</sup>-Me), 3.09 (*m*, 8H, N-CH<sub>2</sub>-CH<sub>3</sub>), 6.09 (*d*, 1H,  $^3J_{\text{P,H}} = 1.7$  Hz, C<sup>5</sup>-H).  $^{13}\text{C}$  NMR (100.6 MHz,  $\text{CDCl}_3$ ):  $\delta$  = 13.8 and 13.9 (*s*, C<sup>4'</sup>, C<sup>5'</sup>-Me), 14.7 (*d*,  $^3J_{\text{P,C}} = 3.2$  Hz, N-CH<sub>2</sub>-CH<sub>3</sub>), 43 (*d*,  $^2J_{\text{P,C}} = 17.7$  Hz, N-CH<sub>2</sub>-CH<sub>3</sub>), 107.5 and 112.5 (*s*, C<sup>2</sup>, C<sup>2'</sup>), 119.5 (*d*,  $^2J_{\text{P,C}} = 14.5$  Hz, C<sup>5</sup>), 122.8 and 123.1 (*s*, C<sup>4'</sup> and C<sup>5'</sup>), 140.4 (*d*,  $^1J_{\text{P,C}} = 18.4$  Hz, C<sup>4</sup>).  $^{31}\text{P}\{^1\text{H}\}$  NMR (162.0 MHz,  $\text{CDCl}_3$ ):  $\delta$  = 84.7 (*s*).  $^{31}\text{P}$  NMR (162.0 MHz,  $\text{CDCl}_3$ ):  $\delta$  = 84.7 (*m*). MS (EI, 70 eV): *m/z* (%) = 438 (6) [M+O<sub>2</sub>]<sup>+</sup>, 406.0 (36) [M]<sup>+</sup>, 231.9 (100) [M-P(NEt<sub>2</sub>)<sub>2</sub>+H]<sup>+</sup>. HR-MS: Calculated: 406.0794, Found: 406.0791. EA (%): Calculated/Found C: 47.26/46.35, H: 6.69/6.73, N: 6.89/5.84, S: 31.54/29.98.

#### 4-Diethylamino(phenyl)phosphanyl-4',5'-dipropyl-2,2'-bis(1,3-dithiolylidene) (3e)

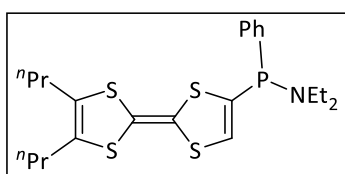

Product: Orange oil, Yield: 497 mg (1.06 mmol, 88%).  $^1\text{H}$  NMR (500.1 MHz,  $\text{CDCl}_3$ ):  $\delta$  = 0.93 (*t*, 6H,  $^3J_{\text{H,H}} = 7.35$  Hz,  $\text{C}^4$ ,  $\text{C}^{5'}$ -CH<sub>2</sub>-CH<sub>2</sub>-CH<sub>3</sub>), 1.09 (*t*, 6H,  $^3J_{\text{H,H}} = 7.08$  Hz, N-CH<sub>2</sub>-CH<sub>3</sub>), 1.53 (*m*, 4H,  $\text{C}^4$ ,  $\text{C}^{5'}$ -CH<sub>2</sub>-CH<sub>2</sub>-CH<sub>3</sub>), 2.31 (*m*, 4H,  $\text{C}^4$ ,  $\text{C}^{5'}$ -CH<sub>2</sub>-CH<sub>2</sub>-CH<sub>3</sub>), 3.11 (*m*, 4H, N-CH<sub>2</sub>-CH<sub>3</sub>), 6.60 (*d*, 1H,  $^3J_{\text{P,H}} = 9$  Hz,  $\text{C}^5$ -H), 7.30 (*m*, 1H, *para*-C<sub>6</sub>H<sub>5</sub>), 7.36 (*m*, 2H, *meta*-C<sub>6</sub>H<sub>5</sub>), 7.42 (*m*, 2H, *ortho*-C<sub>6</sub>H<sub>5</sub>).  $^{13}\text{C}$  NMR (125.8 MHz,  $\text{CDCl}_3$ ):  $\delta$  = 13.8 (2s,  $\text{C}^4$ ,  $\text{C}^{5'}$ -CH<sub>2</sub>-CH<sub>2</sub>-CH<sub>3</sub>), 14.6 (*d*,  $^3J_{\text{P,C}} = 3.37$  Hz, N-CH<sub>2</sub>-CH<sub>3</sub>), 23.1 (2s,  $\text{C}^4$ ,  $\text{C}^{5'}$ -CH<sub>2</sub>-CH<sub>2</sub>-CH<sub>3</sub>), 30.9 (s,  $\text{C}^4$ ,  $\text{C}^{5'}$ -CH<sub>2</sub>-CH<sub>2</sub>-CH<sub>3</sub>), 44.6 (*d*,  $^2J_{\text{P,C}} = 14.79$  Hz, N-CH<sub>2</sub>-CH<sub>3</sub>), 108.6 and 110.8 (s,  $\text{C}^2$ ,  $\text{C}^{2'}$ ), 119.2 (s,  $\text{C}^4$  and  $\text{C}^{5'}$ ), 127.6 (*d*,  $^2J_{\text{P,C}} = 42.22$  Hz,  $\text{C}^5$ ), 128.4-129 (*para*, *meta*-C<sub>6</sub>H<sub>5</sub>), 130.7 (*d*,  $^2J_{\text{P,C}} = 17.91$  Hz, *ortho*-C<sub>6</sub>H<sub>5</sub>), 138.4 (*d*,  $^1J_{\text{P,C}} = 40.7$  Hz,  $\text{C}^4$ ), 138.6 (*d*,  $^1J_{\text{P,C}} = 19.5$  Hz, *ipso*-C<sub>6</sub>H<sub>5</sub>).  $^{31}\text{P}\{^1\text{H}\}$  NMR (202.5 MHz,  $\text{CDCl}_3$ ):  $\delta$  = 52.9 (s).  $^{31}\text{P}$  NMR (202.5 MHz,  $\text{CDCl}_3$ ):  $\delta$  = 52.9 (*m*). MS (EI, 70 eV): *m/z* (%) = 499.1 (8) [ $\text{M}+\text{O}_2$ ]<sup>+</sup>, 467.1 (30) [ $\text{M}$ ]<sup>+</sup>, 396.0 (5) [ $\text{M}-\text{NEt}_2$ ]<sup>+</sup>, 288 (100) [ $\text{M}-\text{P}(\text{NEt}_2)\text{Ph}+\text{H}$ ]<sup>+</sup>, 230.0 (30) [ $\text{M}-\text{P}(\text{NEt}_2)\text{Ph}-2\text{C}_2\text{H}_5+2\text{H}$ ]<sup>+</sup>, 180.1 (10) [ $\text{P}(\text{NEt}_2)\text{Ph}$ ]<sup>+</sup>. HR-MS: Calculated: 467.0999, Found: 467.1008. EA (%): Calculated/Found C: 56.50/56.44, H: 6.47/6.21, N: 2.99/3.30, S: 27.42/30.13.

#### 4-Bis(diethylamino)phosphanyl-4',5'-dipropyl-2,2'-bis(1,3-dithiolylidene) (3f)

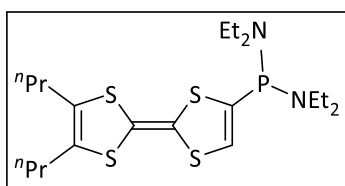

Product: Orange oil, Yield: 1.718 gr (3.71 mmol, 70%).  $^1\text{H}$  NMR (500.1 MHz,  $\text{CDCl}_3$ ):  $\delta$  = 0.93 (*t*, 6H,  $^3J_{\text{H,H}} = 7.36$  Hz,  $\text{C}^4$ ,  $\text{C}^{5'}$ -CH<sub>2</sub>-CH<sub>2</sub>-CH<sub>3</sub>), 1.07 (*t*, 12H,  $^3J_{\text{H,H}} = 7.05$  Hz, N-CH<sub>2</sub>-CH<sub>3</sub>), 1.53 (*m*, 4H,  $\text{C}^4$ ,  $\text{C}^{5'}$ -CH<sub>2</sub>-CH<sub>2</sub>-CH<sub>3</sub>), 2.31 (*t*, 4H,  $^3J_{\text{H,H}} = 7.52$  Hz,  $\text{C}^4$ ,  $\text{C}^{5'}$ -CH<sub>2</sub>-CH<sub>2</sub>-CH<sub>3</sub>), 3.09 (*m*, 8H, N-CH<sub>2</sub>-CH<sub>3</sub>), 6.09 (*d*, 1H,  $^3J_{\text{P,H}} = 1.8$  Hz,  $\text{C}^5$ -H).  $^{13}\text{C}$  NMR (125.8 MHz,  $\text{CDCl}_3$ ):  $\delta$  = 13.8 (s,  $\text{C}^4$ ,  $\text{C}^{5'}$ -CH<sub>2</sub>-CH<sub>2</sub>-CH<sub>3</sub>), 14.7 (*d*,  $^3J_{\text{P,C}} = 3.22$  Hz, N-CH<sub>2</sub>-CH<sub>3</sub>), 23.1 (2s,  $\text{C}^4$ ,  $\text{C}^{5'}$ -CH<sub>2</sub>-CH<sub>2</sub>-CH<sub>3</sub>), 30.9 (2s,  $\text{C}^4$ ,  $\text{C}^{5'}$ -CH<sub>2</sub>-CH<sub>2</sub>-CH<sub>3</sub>), 43 (*d*,  $^2J_{\text{P,C}} = 17.59$  Hz, N-CH<sub>2</sub>-CH<sub>3</sub>), 107.9 (s,  $\text{C}^2$ ), 111.7 (*d*,  $^3J_{\text{P,C}} = 2.93$  Hz,  $\text{C}^2$ ), 119.6 (*d*,  $^2J_{\text{P,C}} = 14.61$  Hz,  $\text{C}^5$ ), 128.7 and 129 (s,  $\text{C}^4$  and  $\text{C}^{5'}$ ), 140.4 (*d*,  $^1J_{\text{P,C}} = 18.13$  Hz,  $\text{C}^4$ ).  $^{31}\text{P}\{^1\text{H}\}$  NMR (202.5 MHz,  $\text{CDCl}_3$ ):  $\delta$  = 84.7 (s).

$^{31}\text{P}$  NMR (202.5 MHz,  $\text{CDCl}_3$ ):  $\delta = 84.7$  (*m*). MS (EI, 70 eV):  $m/z$  (%) = 494.1 (35)  $[\text{M}+\text{O}_2]^+$ , 462.1 (92)  $[\text{M}]^+$ , 390.0 (10)  $[\text{M}-\text{NEt}_2]^+$ , 319.0 (5)  $[\text{M}-2(\text{NEt}_2)+\text{H}]^+$ , 287 (10)  $[\text{M}-\text{P}(\text{NEt}_2)_2]^+$ , 230.0 (95)  $[\text{M}-\text{P}(\text{NEt}_2)_2-2\text{C}_2\text{H}_5+2\text{H}]^+$ , 175.1 (100)  $[\text{P}(\text{NEt}_2)_2]^+$ . HR-MS: Calculated: 462.1421, Found: 462.1435. EA (%): Calculated/Found C: 51.91/52.09, H: 7.62/7.23, N: 6.05/6.06, S: 27.71/36.00.

### Synthesis of 4-Chlorophosphanyltetrathiafulvalenes 4a–h

**General protocol (I):** **3a,c,e** were each dissolved in dry dichloromethane in a Schlenk tube, then  $\text{PCl}_3$  (1 eq) was added dropwise, and the reaction mixture was stirred for 1 hour (**3a**), 2 (**3c**) or 3 hours (**3e**) at r.t. The reaction mixture was concentrated in *vacuo* ( $8 \times 10^{-3}$  mbar), and the residue was then dissolved in dry diethylether. The solution was filtered, concentrated and dried in *vacuo* ( $8 \times 10^{-3}$  mbar).

**General protocol (II):** **3b,d,f** were each dissolved in dry diethylether in a Schlenk tube and cooled to  $-90$  °C, then  $\text{PCl}_3$  (1 eq) was added dropwise, and the reaction mixture was warmed up slowly and stirred for 1 h. The reaction mixture was concentrated in *vacuo* ( $8 \times 10^{-3}$  mbar), and the residue was then dissolved in dry diethylether. The solution was filtered, concentrated and dried in *vacuo* ( $8 \times 10^{-3}$  mbar).

#### 4-Chloro(phenyl)phosphanyl-2,2'-bis(1,3-dithiolylidene) (4a)

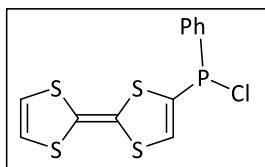

Product: Red oil of the raw product (content of **4a**: 85%).  $^1\text{H}$  NMR (500.1 MHz,  $\text{CDCl}_3$ ):  $\delta = 6.28$  and  $6.29$  (*d*, 2H,  $^3J_{\text{H,H}} = 6.8$  Hz,  $\text{C}^{4'}$ ,  $\text{C}^{5'}$ -H),  $6.31$  (*s*, TTF),  $6.96$  (*d*, 1H,  $^3J_{\text{P,H}} = 10.8$  Hz,  $\text{C}^5$ -H),  $7.46$  (*m*, 3H, *para*, *meta*- $\text{C}_6\text{H}_5$ ),  $7.71$  (*m*, 2H, *ortho*- $\text{C}_6\text{H}_5$ ).  $^{13}\text{C}$  NMR (125.8 MHz,  $\text{CDCl}_3$ ):  $\delta = 109.4$  and  $113.2$  (*s*,  $\text{C}^2$ ,  $\text{C}^{2'}$ ),  $119$  and  $119.2$  (*s*,  $\text{C}^{4'}$  and  $\text{C}^{5'}$ ),  $119.3$  (*s*,  $\text{C}^{4,4'}$ ,  $\text{C}^{5,5'}$ -TTF),  $128.9$ ,  $129$  and  $130.7$  (*para*, *meta*-  $\text{C}_6\text{H}_5$ ),  $131$  (*d*,  $^2J_{\text{P,C}} = 13.1$  Hz, *ortho*- $\text{C}_6\text{H}_5$ ),  $132.3$  (*d*,  $^2J_{\text{P,C}} = 52$  Hz,  $\text{C}^5$ ),  $135.9$  (*d*,  $^1J_{\text{P,C}} = 28.9$  Hz, *ipso*- $\text{C}_6\text{H}_5$ ),  $136.7$  (*d*,  $^1J_{\text{P,C}} = 61.2$  Hz,  $\text{C}^4$ ).  $^{31}\text{P}\{^1\text{H}\}$  NMR (202.5 MHz,  $\text{CDCl}_3$ ):  $\delta = 63.9$  (*s*, *with chlorine shoulder*).  $^{31}\text{P}$  NMR (202.5 MHz,  $\text{CDCl}_3$ ):  $\delta = 63.9$  (*m*). MS (EI, 70 eV):  $m/z$  (%) = 345.8 (4)  $[\text{M}]^+$ , 311.8 (16)  $[\text{M}-\text{Cl}+\text{H}]^+$ , 203.8 (100)  $[\text{M}-\text{PhPCl}+\text{H}]^+$ . HR-MS: Calculated: 345.8935, Found: 345.8935.



#### 4-Chloro(diethylamino)phosphanyl-2,2'-bis(1,3-dithiolylidene) (**4b**)

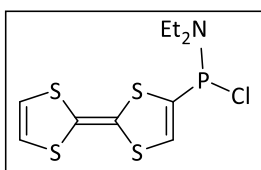

Product: Yellow-orange oil of the raw product (content of **4b**: 95%).  $^1\text{H}$  NMR (500.1 MHz,  $\text{CDCl}_3$ ):  $\delta$  = 1.17 (*t*, 6H,  $^3J_{\text{H,H}}$  = 7.4 Hz, N-CH<sub>2</sub>-CH<sub>3</sub>), 3.20 (*m*, 4H, N-CH<sub>2</sub>-CH<sub>3</sub>), 6.30 and 6.32 (*d*, 2H,  $^3J_{\text{H,H}}$  = 6.5 Hz, C<sup>4'</sup>, C<sup>5'</sup>-H), 6.31 (*s*, TTF), 6.73 (*d*, 1H,  $^3J_{\text{P,H}}$  = 2.6 Hz, C<sup>5</sup>-H).  $^{13}\text{C}$  NMR (125.8 MHz,  $\text{CDCl}_3$ ):  $\delta$  = 14.1 (*d*,  $^3J_{\text{P,C}}$  = 6.2 Hz, N-CH<sub>2</sub>-CH<sub>3</sub>), 43.9 (*d*,  $^2J_{\text{P,C}}$  = 14.8 Hz, N-CH<sub>2</sub>-CH<sub>3</sub>), 110.6 and 112.1 (*s*, C<sup>2</sup>, C<sup>2'</sup>), 119.1 and 119.3 (*s*, C<sup>4'</sup> and C<sup>5'</sup>), 126.4 (*d*,  $^2J_{\text{P,C}}$  = 18.5 Hz, C<sup>5</sup>), 136.9 (*d*,  $^1J_{\text{P,C}}$  = 50.9 Hz, C<sup>4</sup>).  $^{31}\text{P}\{^1\text{H}\}$  NMR (202.5 MHz,  $\text{CDCl}_3$ ):  $\delta$  = 117.9 (*s*).  $^{31}\text{P}$  NMR (202.5 MHz,  $\text{CDCl}_3$ ):  $\delta$  = 117.9 (*s*). MS (EI, 70 eV): *m/z* (%) = 372.9 (30)  $[\text{M}+\text{O}_2]^+$ , 340.9 (90)  $[\text{M}]^+$ , 203.9 (78)  $[\text{M}-\text{P}(\text{NEt}_2)_2+\text{H}]^+$ . HR-MS: Calculated: 340.9357, Found: 340.9352.

#### 4-Chloro(phenyl)phosphanyl-4',5'-dimethyl-2,2'-bis(1,3-dithiolylidene) (**4c**)

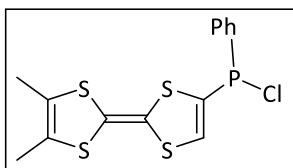

Product: Red powder, Yield: 271 mg (0.72 mmol, 90%), Melting point: 104 °C.  $^1\text{H}$  NMR (500.1 MHz,  $\text{CDCl}_3$ ):  $\delta$  = 1.91 (*m*, 6H, C<sup>4'</sup>, C<sup>5'</sup>-Me), 6.95 (*d*, 1H,  $^3J_{\text{P,H}}$  = 10.7 Hz, C<sup>5</sup>-H), 7.46 (*m*, 3H, *para, meta*-C<sub>6</sub>H<sub>5</sub>), 7.71 (*m*, 2H, *ortho*-C<sub>6</sub>H<sub>5</sub>).  $^{13}\text{C}$  NMR (125.8 MHz,  $\text{CDCl}_3$ ):  $\delta$  = 13.8 (*s*, C<sup>4'</sup>, C<sup>5'</sup>-Me), 108.4 and 111.9 (*s*, C<sup>2</sup>, C<sup>2'</sup>), 122.8 and 123.1 (*s*, C<sup>4'</sup> and C<sup>5'</sup>), 128.9, 130 and 130.7 (*para, meta*-C<sub>6</sub>H<sub>5</sub>), 131 (*d*,  $^2J_{\text{P,C}}$  = 6.2 Hz, *ortho*-C<sub>6</sub>H<sub>5</sub>), 132.5 (*d*,  $^2J_{\text{P,C}}$  = 52.1 Hz, C<sup>5</sup>), 136 (*d*,  $^1J_{\text{P,C}}$  = 27.8 Hz, *ipso*-C<sub>6</sub>H<sub>5</sub>), 136.6 (*d*,  $^1J_{\text{P,C}}$  = 60.6 Hz, C<sup>4</sup>).  $^{31}\text{P}\{^1\text{H}\}$  NMR (202.5 MHz,  $\text{CDCl}_3$ ):  $\delta$  = 64 (*s*, with chlorine shoulder).  $^{31}\text{P}$  NMR (202.5 MHz,  $\text{CDCl}_3$ ):  $\delta$  = 64 (*m*). MS (EI, 70 eV): *m/z* (%) = 373.9 (100)  $[\text{M}]^+$ , 339.9 (38)  $[\text{M}-\text{Cl}+\text{H}]^+$ , 231.9 (62)  $[\text{M}-\text{PhP}(\text{Cl})+\text{H}]^+$ . HR-MS: Calculated: 373.9248, Found: 373.9243. EA (%): Calculated/Found C: 44.85/45.96, H: 3.23/3.89, S: 34.21/32.69.

#### 4-Chloro(diethylamino)phosphanyl-4',5'-dimethyl-2,2'-bis(1,3-dithiolylidene) (4d)

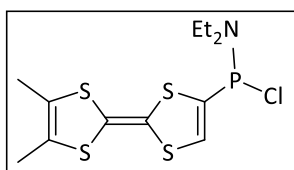

Product: Orange-red oil, Yield: 410 mg (1.1 mmol, 95%).  $^1\text{H}$  NMR (500.1 MHz,  $\text{CDCl}_3$ ):  $\delta$  = 1.17 (*t*, 6H,  $^3J_{\text{H,H}} = 7.2$  Hz, N-CH<sub>2</sub>-CH<sub>3</sub>), 1.94 (*s*, 6H, C<sup>4'</sup>, C<sup>5'</sup>-Me), 3.20 (*m*, 4H, N-CH<sub>2</sub>-CH<sub>3</sub>), 6.72 (*d*, 1H,  $^3J_{\text{P,H}} = 2.7$  Hz, C<sup>5</sup>-H).  $^{13}\text{C}$  NMR (125.8 MHz,  $\text{CDCl}_3$ ):  $\delta$  = 13.9 (*s*, C<sup>4'</sup>, C<sup>5'</sup>-Me), 14.1 (*d*,  $^3J_{\text{P,C}} = 5.9$  Hz, N-CH<sub>2</sub>-CH<sub>3</sub>), 43.9 (*d*,  $^2J_{\text{P,C}} = 15$  Hz, N-CH<sub>2</sub>-CH<sub>3</sub>), 109.6 and 110.8 (*s*, C<sup>2</sup>, C<sup>2'</sup>), 122.9 and 123.1 (*s*, C<sup>4'</sup> and C<sup>5'</sup>), 126.5 (*d*,  $^2J_{\text{P,C}} = 18.6$  Hz, C<sup>5</sup>), 136.8 (*d*,  $^1J_{\text{P,C}} = 51$  Hz, C<sup>4</sup>).  $^{31}\text{P}\{^1\text{H}\}$  NMR (202.5 MHz,  $\text{CDCl}_3$ ):  $\delta$  = 118.2 (*s*).  $^{31}\text{P}$  NMR (202.5 MHz,  $\text{CDCl}_3$ ):  $\delta$  = 118.2 (*m*). MS (EI, 70 eV): *m/z* (%) = 368.9 (26) [M]<sup>+</sup>, 231.9 (86) [M-(Et<sub>2</sub>N)PCl+H]<sup>+</sup>. HR-MS: Calculated: 368.9670, Found: 368.9663.

#### 4-Chloro(phenyl)phosphanyl-4',5'-dipropyl-2,2'-bis(1,3-dithiolylidene) (4e)

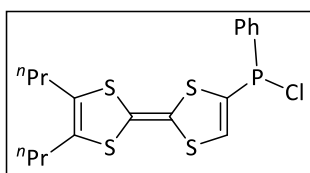

Product: Red oil, Yield: 362 mg (0.84 mmol, 98%).  $^1\text{H}$  NMR (500.1 MHz,  $\text{CDCl}_3$ ):  $\delta$  = 0.92 (*m*, 6H, C<sup>4'</sup>, C<sup>5'</sup>-CH<sub>2</sub>-CH<sub>2</sub>-CH<sub>3</sub>), 1.51 (*m*, 4H, C<sup>4'</sup>, C<sup>5'</sup>-CH<sub>2</sub>-CH<sub>2</sub>-CH<sub>3</sub>), 2.30 (*m*, 4H, C<sup>4'</sup>, C<sup>5'</sup>-CH<sub>2</sub>-CH<sub>2</sub>-CH<sub>3</sub>), 6.95 (*d*, 1H,  $^3J_{\text{P,H}} = 10.73$  Hz, C<sup>5</sup>-H), 7.46 (*m*, 3H, *para*, *meta*-C<sub>6</sub>H<sub>5</sub>), 7.71 (*m*, 2H, *ortho*-C<sub>6</sub>H<sub>5</sub>).  $^{13}\text{C}$  NMR (125.8 MHz,  $\text{CDCl}_3$ ):  $\delta$  = 13.8 (*s*, C<sup>4'</sup>, C<sup>5'</sup>-CH<sub>2</sub>-CH<sub>2</sub>-CH<sub>3</sub>), 23.1 (2*s*, C<sup>4'</sup>, C<sup>5'</sup>-CH<sub>2</sub>-CH<sub>2</sub>-CH<sub>3</sub>), 30.8 (2*s*, C<sup>4'</sup>, C<sup>5'</sup>-CH<sub>2</sub>-CH<sub>2</sub>-CH<sub>3</sub>), 107.7 and 112.2 (*s*, C<sup>2</sup>, C<sup>2'</sup>), 129 (*s*, C<sup>4'</sup> and C<sup>5'</sup>), 128.8 - 131 (*para*, *meta*- *ortho*-C<sub>6</sub>H<sub>5</sub>), 132.6 (*d*,  $^2J_{\text{P,C}} = 52.24$  Hz, C<sup>5</sup>), 136 (*d*,  $^1J_{\text{P,C}} = 28.08$  Hz, *ipso*-C<sub>6</sub>H<sub>5</sub>), 136.6 (*d*,  $^1J_{\text{P,C}} = 60.43$  Hz, C<sup>4</sup>).  $^{31}\text{P}\{^1\text{H}\}$  NMR (202.5 MHz,  $\text{CDCl}_3$ ):  $\delta$  = 64.1 (*s*, with chlorine shoulder).  $^{31}\text{P}$  NMR (202.5 MHz,  $\text{CDCl}_3$ ):  $\delta$  = 64.1 (*m*). MS (LIFDI): *m/z* (%) = 430.0 (100) [M]<sup>+</sup> HR-MS (ESI-pos): [M-Cl+OH]<sup>+</sup> (100%) Calculated: 412.0207, Found: 412.0207. EA (%): Calculated/Found C: 50.16/51.01, H: 4.68/4.99, S: 29.75/30.48.

#### 4-Chloro(diethylamino)phosphanyl-4',5'-dipropyl-2,2'-bis(1,3-dithiolylidene) (4f)

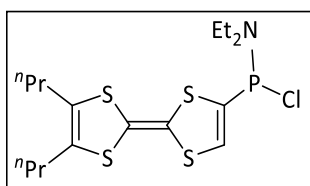

Product: Red oil, Yield: 1.487 gr (3.49 mmol, 100%).  $^1\text{H}$  NMR (500.1 MHz,  $\text{CDCl}_3$ ):  $\delta$  = 0.94 (2t, 6H,  $^3J_{\text{H,H}} = 7.34$  Hz,  $\text{C}^4$ ,  $\text{C}^{5'}$ - $\text{CH}_2$ - $\text{CH}_2$ - $\underline{\text{CH}_3}$ ), 1.16 (t, 6H,  $^3J_{\text{H,H}} = 7.16$  Hz, N- $\text{CH}_2$ - $\underline{\text{CH}_3}$ ), 1.53 (m, 4H,  $\text{C}^4$ ,  $\text{C}^{5'}$ - $\text{CH}_2$ - $\underline{\text{CH}_2}$ - $\text{CH}_3$ ), 2.32 (m, 4H,  $\text{C}^4$ ,  $\text{C}^{5'}$ - $\underline{\text{CH}_2}$ - $\text{CH}_2$ - $\text{CH}_3$ ), 3.20 (m, 4H, N- $\underline{\text{CH}_2}$ - $\text{CH}_3$ ), 6.72 (d, 1H,  $^3J_{\text{P,H}} = 2.61$  Hz,  $\text{C}^5$ -H).  $^{13}\text{C}$  NMR (125.8 MHz,  $\text{CDCl}_3$ ):  $\delta$  = 13.8 (s,  $\text{C}^4$ ,  $\text{C}^{5'}$ - $\text{CH}_2$ - $\underline{\text{CH}_2}$ - $\text{CH}_3$ ), 14.1 (d,  $^3J_{\text{P,C}} = 6.08$  Hz, N- $\underline{\text{CH}_2}$ - $\underline{\text{CH}_3}$ ), 23.1 (2s,  $\text{C}^4$ ,  $\text{C}^{5'}$ - $\text{CH}_2$ - $\underline{\text{CH}_2}$ - $\text{CH}_3$ ), 30.9 (s,  $\text{C}^4$ ,  $\text{C}^{5'}$ - $\underline{\text{CH}_2}$ - $\text{CH}_2$ - $\text{CH}_3$ ), 43.9 (d,  $^2J_{\text{P,C}} = 14.7$  Hz, N- $\underline{\text{CH}_2}$ - $\text{CH}_3$ ), 108.9 (d,  $^4J_{\text{P,C}} = 2.88$  Hz,  $\text{C}^2$ ), 111.2 (s,  $\text{C}^2$ ), 126.6 (d,  $^2J_{\text{P,C}} = 18.57$  Hz,  $\text{C}^5$ ), 128.9 and 129 (s,  $\text{C}^4$  and  $\text{C}^{5'}$ ), 136.8 (d,  $^1J_{\text{P,C}} = 50.81$  Hz,  $\text{C}^4$ ).  $^{31}\text{P}\{^1\text{H}\}$  NMR (202.5 MHz,  $\text{CDCl}_3$ ):  $\delta$  = 118.4 (s).  $^{31}\text{P}$  NMR (202.5 MHz,  $\text{CDCl}_3$ ):  $\delta$  = 118.4 (p,  $^3J_{\text{P,H}} = 12.29$  Hz) MS (LIFDI): m/z (%) = 425.1 (100)  $[\text{M}]^+$  HR-MS (ESI-pos):  $[\text{M}-\text{Cl}]^+$  (5%) Calculated: 390.0602, Found: 390.0598,  $[\text{M}-\text{Cl}+\text{OH}]^+$  (100%) Calculated: 407.0629, Found: 407.0625. EA (%): Calculated/Found C: 45.11/45.06, H: 5.91/6.02, N: 3.29/3.54, S: 30.10/31.89.

#### Synthesis of 1,4-bis(diethylamino)-1,4H-1,4-diphosphinines 5d–f

**4d,e,f** were each dissolved in dry THF and cooled down to  $-95$  °C. A solution of LDA (1.1 eq) in dry THF was prepared and cooled down to  $-95$  °C, then it was added dropwise to starting material. Then the reaction mixture was allowed to warm up slowly and stirred for 3 hours. After that the solvent was evaporated in *vacuo* ( $8 \times 10^{-3}$  mbar). Then the residue was taken up in dry diethylether and filtered, the solution was concentrated and dried in *vacuo* ( $8 \times 10^{-3}$  mbar).

#### 2,6-Bis(4,5-dimethyl-1,3-dithiol-2-ylidene)-bis(1,3-dithiole)[2,3-d:5,6-d']-4,8-bis(diethylamino)-4,8H-4,8-diphosphinine (5d)

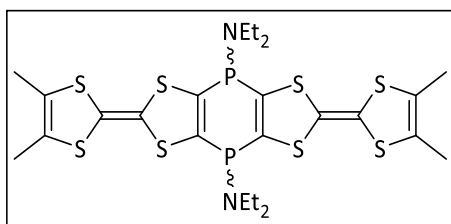

Product: Brown powder, Yield: 162 mg (0.24 mmol, 60%), Melting point: 182 °C (decomp.).  $^1\text{H}$  NMR (500.1 MHz,  $\text{CDCl}_3$ ):  $\delta = 1.11$  and  $1.16$  (*t*, 12H,  $^3J_{\text{H,H}} = 7.1$  Hz, N- $\text{CH}_2\text{-CH}_3$ ),  $1.93$  (*s*, 12H,  $\text{C}^4, \text{C}^4\text{-Me}$ ),  $2.98$  and  $3.05$  (*m*, 8H, N- $\text{CH}_2\text{-CH}_3$ ).  $^{13}\text{C}$  NMR (125.8 MHz,  $\text{CDCl}_3$ ):  $\delta = 13.9$  (*s*,  $\text{C}^4, \text{C}^5\text{-Me}$ ),  $14.9$  (*br*, N- $\text{CH}_2\text{-CH}_3$ ),  $44.8$  (*br*, N- $\text{CH}_2\text{-CH}_3$ ),  $110.8$  and  $111$  (*s*,  $\text{C}^2, \text{C}^{2'}$ ),  $123.1$  and  $123.1$  (*s*,  $\text{C}^4$  and  $\text{C}^5$ ),  $133.5$  and  $139$  (*m*,  $\text{C}^{2,3,5,6}$ , central ring).  $^{31}\text{P}\{^1\text{H}\}$  NMR (202.5 MHz,  $\text{CDCl}_3$ ):  $\delta = 29.4$  (*s*),  $32.3$  (*s*).  $^{31}\text{P}$  NMR (202.5 MHz,  $\text{CDCl}_3$ ):  $\delta = 29.4$  (*m*),  $32.3$  (*m*). MS (EI, 70 eV):  $m/z$  (%) = 698 (8)  $[\text{M}+\text{O}_2]^+$ , 666 (80)  $[\text{M}]^+$ , 521.8 (35)  $[\text{M}-(\text{Et}_2\text{N})_2\text{PCl}]^+$ . HR-MS: Calculated: 665.9806, Found: 665.9819. EA (%): Calculated/Found C: 43.22/44.49, H: 4.84/5.99, N: 4.20/3.09, S: 38.45/29.82.

**2,6-Bis(4,5-dipropyl-1,3-dithiol-2-ylidene)-bis(1,3-dithiole)[2,3-d:5,6-d']-4,8-diphenyl-4,8H-4,8-diphosphinine (5e)**

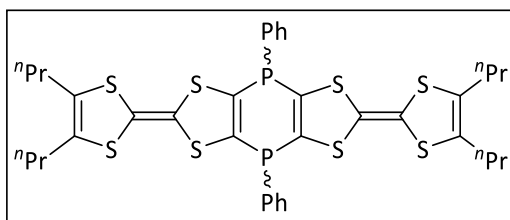

Product: Brown powder, Yield: 251 mg (0.31 mmol, 97%), Melting point: 131 °C.  $^1\text{H}$  NMR (500.1 MHz,  $\text{CDCl}_3$ ):  $\delta = 0.9$  (*m*, 12H,  $\text{C}^{4'}, \text{C}^{5'}\text{-CH}_2\text{-CH}_2\text{-CH}_3$ ),  $1.46$  (*m*, 8H,  $\text{C}^{4'}, \text{C}^{5'}\text{-CH}_2\text{-CH}_2\text{-CH}_3$ ),  $2.26$  (*m*, 8H,  $\text{C}^{4'}, \text{C}^{5'}\text{-CH}_2\text{-CH}_2\text{-CH}_3$ ),  $7.39\text{-}7.73$  (*m*, 5H, *para*, *meta*, *ortho* -  $\text{C}_6\text{H}_5$ ).  $^{13}\text{C}$  NMR (125.8 MHz,  $\text{CDCl}_3$ ):  $\delta = 13.7$  (*s*,  $\text{C}^{4'}, \text{C}^{5'}\text{-CH}_2\text{-CH}_2\text{-CH}_3$ ),  $23.1$  (*s*,  $\text{C}^{4'}, \text{C}^{5'}\text{-CH}_2\text{-CH}_2\text{-CH}_3$ ),  $30.8$  (*s*,  $\text{C}^{4'}, \text{C}^{5'}\text{-CH}_2\text{-CH}_2\text{-CH}_3$ ),  $113.6$  and  $114$  (*s*,  $\text{C}^2, \text{C}^{2'}$ ),  $128.7\text{-}135.1$  (*m*, *para*, *meta*, *ortho*, *ipso* -  $\text{C}_6\text{H}_5$ ),  $134.2$  (*m*,  $\text{C}^{2,3,5,6}$ , central ring).  $^{31}\text{P}\{^1\text{H}\}$  NMR (202.5 MHz,  $\text{CDCl}_3$ ):  $\delta = -21.9$  (*s*),  $-26.2$  (*s*).  $^{31}\text{P}$  NMR (202.5 MHz,  $\text{CDCl}_3$ ):  $\delta = -21.9$  (*m*),  $-26.2$  (*m*). MS (EI, 70 eV):  $m/z$  (%) = 788.2 (5)  $[\text{M}]^+$ , 287.0 (32)  $[\text{nPr}_2\text{TTF}]$ , 230.1 (80)  $[\text{DimethylTTF}]$ . HR-MS: Calculated: 788.0214, Found: 788.0220. EA (%): Calculated/Found C: 54.79/55.50, H: 4.85/5.36, S: 32.5/31.47.

**2,6-Bis(4,5-dipropyl-1,3-dithiol-2-ylidene)-bis(1,3-dithiole)[2,3-d:5,6-d']-4,8-bis(diethylamino)-4,8H-4,8-diphosphinine (5f)**

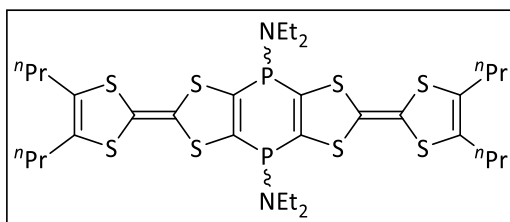

Product: Brown powder, Yield: 1.253 mg (3.21 mmol, 100%), Melting point: 118 °C.  $^1\text{H}$  NMR (500.1 MHz,  $\text{CDCl}_3$ ):  $\delta$  = 0.93 (*t*, 12H,  $^3J_{\text{H,H}} = 7.35$  Hz,  $\text{C}^{4'}$ ,  $\text{C}^{5'}$ - $\text{CH}_2$ - $\text{CH}_2$ - $\underline{\text{CH}_3}$ ), 1.12 (*m* (*2t*), 12H, N- $\text{CH}_2$ - $\underline{\text{CH}_3}$ ), 1.53 (*m*, 8H,  $\text{C}^{4'}$ ,  $\text{C}^{5'}$ - $\text{CH}_2$ - $\underline{\text{CH}_2}$ - $\text{CH}_3$ ), 2.31 (*m*, 8H,  $\text{C}^{4'}$ ,  $\text{C}^{5'}$ - $\underline{\text{CH}_2}$ - $\text{CH}_2$ - $\text{CH}_3$ ), 2.99 (*m*, 8H, N- $\underline{\text{CH}_2}$ - $\text{CH}_3$ ).  $^{13}\text{C}$  NMR (125.8 MHz,  $\text{CDCl}_3$ ):  $\delta$  = 13.8 (*s*,  $\text{C}^{4'}$ ,  $\text{C}^{5'}$ - $\text{CH}_2$ - $\underline{\text{CH}_2}$ - $\text{CH}_3$ ), 14.9 (*s*, N- $\text{CH}_2$ - $\underline{\text{CH}_3}$ ), 23.1 (*2s*,  $\text{C}^{4'}$ ,  $\text{C}^{5'}$ - $\text{CH}_2$ - $\underline{\text{CH}_2}$ - $\text{CH}_3$ ), 30.9 (*s*,  $\text{C}^{4'}$ ,  $\text{C}^{5'}$ - $\underline{\text{CH}_2}$ - $\text{CH}_2$ - $\text{CH}_3$ ), 44.8 (*m* (*2d*), N- $\underline{\text{CH}_2}$ - $\text{CH}_3$ ), 110.9 and 111.3 (*s*,  $\text{C}^2$ ,  $\text{C}^{2'}$ ), 129 (*2s*,  $\text{C}^{4'}$  and  $\text{C}^{5'}$ ), 133.5 and 139.1 (*m*,  $\text{C}^{2,3,5,6}$ , central ring).  $^{31}\text{P}\{^1\text{H}\}$  NMR (202.5 MHz,  $\text{CDCl}_3$ ):  $\delta$  = 29.7 (*s*), 32.5 (*s*).  $^{31}\text{P}$  NMR (202.5 MHz,  $\text{CDCl}_3$ ):  $\delta$  = 29.7 (*m*), 32.5 (*m*). MS (EI, 70 eV):  $m/z$  (%) = 778.1 (75)  $[\text{M}]^+$ , 634.0 (10)  $[\text{M}-2\text{NEt}_2]^+$ , 230.0 (100) [DimethylITTF]. HR-MS: Calculated: 778.1058, Found: 778.1079. EA (%): Calculated/Found C: 49.33/49.46, H: 6.21/6.08, N: 3.60/3.63, S: 32.92/41.50.

**Oxidation of the 1,4-bis(diethylamino)-1,4H-1,4-diphosphinines with hydrogen peroxide-urea adduct 6**

hydrogen peroxide-urea adduct was added to a Schlenk tube, containing starting material, then DCM was added and the reaction mixture was stirred overnight at r.t. After this time, solvent was removed in *vacuo* ( $8 \times 10^{-3}$  mbar). The residue was extracted with DCM (2x20 mL) and the solution was concentrated and dried in *vacuo* ( $8 \times 10^{-3}$  mbar). In the case of **6d**, the product was washed with *n*Pentane (2x10 mL) and dried in *vacuo* ( $8 \times 10^{-3}$  mbar).

**2,6-Bis(4,5-dimethyl-1,3-dithiol-2-ylidene)-bis(1,3-dithiole)[2,3-d:5,6-d']-4,8-bis(diethylamino)-4,8H-4,8-dioxide-4,8-diphosphinine (6d)**

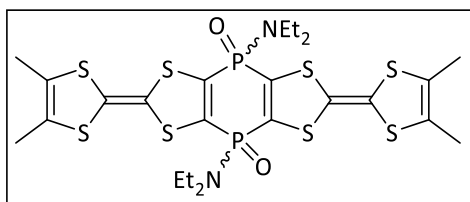

Product: Brown powder, Yield: 31 mg (0.044 mmol, 74%), Melting point: 207 °C.  $^1\text{H}$  NMR (500.1 MHz,  $\text{CDCl}_3$ ):  $\delta$  = 1.17 (*m*(*2t*), 12H, N-CH<sub>2</sub>-CH<sub>3</sub>), 1.94 (*s*, 12H, C<sup>4'</sup>, C<sup>5'</sup>-CH<sub>3</sub>), 3.14 (*m*, 8H, N-CH<sub>2</sub>-CH<sub>3</sub>).  $^{13}\text{C}$  NMR (125.8 MHz,  $\text{CDCl}_3$ ):  $\delta$  = 13.8 (*s*, N-CH<sub>2</sub>-CH<sub>3</sub>), 14.1 (*s*, C<sup>4'</sup>, C<sup>5'</sup>-CH<sub>3</sub>), 38.2 (*d*,  $^2J_{\text{P,C}}$  = 10.76 Hz, N-CH<sub>2</sub>-CH<sub>3</sub>), 118.1 and 118.4 (*s*, C<sup>2</sup>, C<sup>2'</sup>), 123.1 and 123.2 (*s*, C<sup>4'</sup> and C<sup>5'</sup>), 140.6 (*m*, C<sup>2,3,5,6</sup>, central ring).  $^{31}\text{P}\{^1\text{H}\}$  NMR (202.5 MHz,  $\text{CDCl}_3$ ):  $\delta$  = -2.1 (*s*), -0.8 (*s*).  $^{31}\text{P}$  NMR (202.5 MHz,  $\text{CDCl}_3$ ):  $\delta$  = -2.1 (*m*), -0.8 (*m*). MS (ESI-pos): *m/z* (%) = 730.967 (30) [M+O<sub>2</sub>+H]<sup>+</sup>, 713.965 (76) [M+O]<sup>+</sup>, 697.970 (100) [M]<sup>+</sup>. HR-MS: Calculated: 697.9699, Found: 697.9700. EA (%): Calculated/Found C: 41.24/42.31, H: 4.61/5.21, N: 4.01/4.37, S: 36.96/35.30.

**2,6-Bis(4,5-dipropyl-1,3-dithiol-2-ylidene)-bis(1,3-dithiole)[2,3-d:5,6-d']-4,8-bis(diethylamino)-4,8H-4,8-dioxide-4,8-diphosphinine (6f)**

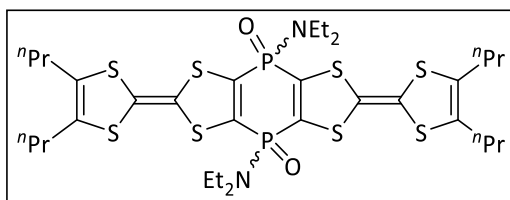

Product: Brown powder, Yield: 42 mg (0.052 mmol, 86%), Melting point: 151 °C.  $^1\text{H}$  NMR (500.1 MHz,  $\text{CDCl}_3$ ):  $\delta$  = 0.93 (*2t*, 12H,  $^3J_{\text{H,H}}$  = 7.34 Hz, C<sup>4'</sup>, C<sup>5'</sup>-CH<sub>2</sub>-CH<sub>2</sub>-CH<sub>3</sub>), 1.18 (*m*(*2t*), 12H, N-CH<sub>2</sub>-CH<sub>3</sub>), 1.52 (*m*, 8H, C<sup>4'</sup>, C<sup>5'</sup>-CH<sub>2</sub>-CH<sub>2</sub>-CH<sub>3</sub>), 2.32 (*m*, 8H, C<sup>4'</sup>, C<sup>5'</sup>-CH<sub>2</sub>-CH<sub>2</sub>-CH<sub>3</sub>), 3.15 (*m*, 8H, N-CH<sub>2</sub>-CH<sub>3</sub>).  $^{13}\text{C}$  NMR (125.8 MHz,  $\text{CDCl}_3$ ):  $\delta$  = 13.7 (*s*, C<sup>4'</sup>, C<sup>5'</sup>-CH<sub>2</sub>-CH<sub>2</sub>-CH<sub>3</sub>), 14.1 (*s*, N-CH<sub>2</sub>-CH<sub>3</sub>), 23.1 (*s*, C<sup>4'</sup>, C<sup>5'</sup>-CH<sub>2</sub>-CH<sub>2</sub>-CH<sub>3</sub>), 30.8 (*s*, C<sup>4'</sup>, C<sup>5'</sup>-CH<sub>2</sub>-CH<sub>2</sub>-CH<sub>3</sub>), 38.2 (*m*, N-CH<sub>2</sub>-CH<sub>3</sub>), 118.3 and 118.9 (*s*, C<sup>2</sup>, C<sup>2'</sup>), 129.1 (*s*, C<sup>4'</sup> and C<sup>5'</sup>), 140.6 (*m*, C<sup>2,3,5,6</sup>, central ring).  $^{31}\text{P}\{^1\text{H}\}$  NMR (202.5 MHz,  $\text{CDCl}_3$ ):  $\delta$  = -2.1 (*s*), -0.7 (*s*).  $^{31}\text{P}$  NMR (202.5 MHz,  $\text{CDCl}_3$ ):  $\delta$  = -2.2 (*m*), -0.7 (*m*). MS (ESI-pos): *m/z* (%) = 843.092 (29) [M+O<sub>2</sub>+H]<sup>+</sup>, 826.090 (65) [M+O]<sup>+</sup>, 810.095 (100) [M]<sup>+</sup>. HR-MS: Calculated: 810.0951,

Found: 810.0953. EA (%): Calculated/Found C: 47.38/47.68, H: 5.96/6.35, N: 3.45/4.09, S: 31.62/28.70.

### Oxidation of the 1,4-bis(diethylamino)-1,4*H*-1,4-diphosphinines with elemental sulfur 7

Elemental sulfur was added to a Schlenk tube, containing starting material, then Toluene was added and the reaction mixture was stirred for 3 hours at 100 °C. After this time, solvent was removed in *vacuo* ( $8 \times 10^{-3}$  mbar). The residue was extracted with DCM (2x20 mL) and the solution was concentrated and dried in *vacuo* ( $8 \times 10^{-3}$  mbar). In the case of **7d**, the product was washed with *n*Pentane (2x10 mL) and dried in *vacuo* ( $8 \times 10^{-3}$  mbar).

#### 2,6-Bis(4,5-dimethyl-1,3-dithiol-2-ylidene)-bis(1,3-dithiole)[2,3-d:5,6-d']-4,8-bis(diethylamino)-4,8*H*-4,8-diphosphinine-4,8-disulfide (**7d**)

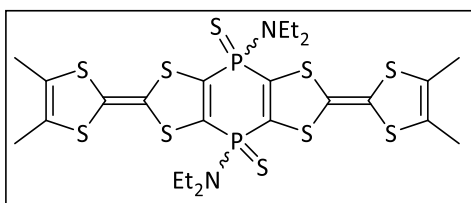

Product: Brown powder, Yield: 26 mg (0.035 mmol, 58%), Melting point: 238 °C. <sup>1</sup>H NMR (500.1 MHz, CDCl<sub>3</sub>): δ = 1.17 (*m*, 12H, N-CH<sub>2</sub>-CH<sub>3</sub>), 1.94 (*s*, 12H, C<sup>4'</sup>, C<sup>5'</sup>-CH<sub>3</sub>), 3.27 (*m*, 8H, N-CH<sub>2</sub>-CH<sub>3</sub>). <sup>13</sup>C NMR (125.8 MHz, CDCl<sub>3</sub>): δ = 13.8 (*s*, N-CH<sub>2</sub>-CH<sub>3</sub>), 14.2 (*s*, C<sup>4'</sup>, C<sup>5'</sup>-CH<sub>3</sub>), 39.3 (*s*, N-CH<sub>2</sub>-CH<sub>3</sub>), 117.7 (2*s*, C<sup>2</sup>, C<sup>2'</sup>), 123.2 (2*s*, C<sup>4'</sup> and C<sup>5'</sup>), 139.8 (*m*, C<sup>2,3,5,6</sup>, central ring). <sup>31</sup>P{<sup>1</sup>H} NMR (202.5 MHz, CDCl<sub>3</sub>): δ = 25.2 (2*s*). <sup>31</sup>P NMR (202.5 MHz, CDCl<sub>3</sub>): δ = 25.2 (*m*). MS (ESI-pos): *m/z* (%) = 762.921 (10) [M+O<sub>2</sub>+H]<sup>+</sup>, 745.919 (48) [M+O]<sup>+</sup>, 729.924 (100) [M]<sup>+</sup>. HR-MS: Calculated: 729.9242, Found: 729.9243. EA (%): Calculated/Found C: 39.43/38.48, H: 4.41/4.83, N: 3.83/3.15, S: 43.85/41.68.

#### 2,6-Bis(4,5-dipropyl-1,3-dithiol-2-ylidene)-bis(1,3-dithiole)[2,3-d:5,6-d']-4,8-bis(diethylamino)-4,8*H*-4,8-diphosphinine-4,8-disulfide (**7f**)

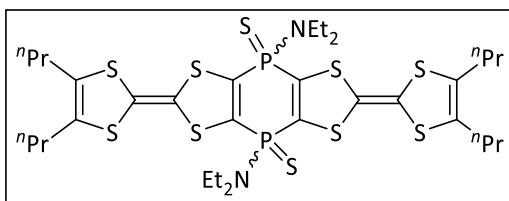

Product: Brown powder, Yield: 41 mg (0.049 mmol, 81%), Melting point: 183 °C.  $^1\text{H}$  NMR (500.1 MHz,  $\text{CDCl}_3$ ):  $\delta$  = 0.93 (*t*, 12H,  $^3J_{\text{H,H}}$  = 7.40 Hz,  $\text{C}^{4'}$ ,  $\text{C}^{5'}$ - $\text{CH}_2$ - $\text{CH}_2$ - $\text{CH}_3$ ), 1.16 and 1.19 (*t*, 12H,  $^3J_{\text{H,H}}$  = 7.1 Hz,  $\text{N-CH}_2$ - $\text{CH}_3$ ), 1.52 (*m*, 8H,  $\text{C}^{4'}$ ,  $\text{C}^{5'}$ - $\text{CH}_2$ - $\text{CH}_2$ - $\text{CH}_3$ ), 2.32 (*m*, 8H,  $\text{C}^{4'}$ ,  $\text{C}^{5'}$ - $\text{CH}_2$ - $\text{CH}_2$ - $\text{CH}_3$ ), 3.27 (*m*, 8H,  $\text{N-CH}_2$ - $\text{CH}_3$ ).  $^{13}\text{C}$  NMR (125.8 MHz,  $\text{CDCl}_3$ ):  $\delta$  = 13.7 (*s*,  $\text{C}^{4'}$ ,  $\text{C}^{5'}$ - $\text{CH}_2$ - $\text{CH}_2$ - $\text{CH}_3$ ), 14.2 (*s*,  $\text{N-CH}_2$ - $\text{CH}_3$ ), 23.1 (*2s*,  $\text{C}^{4'}$ ,  $\text{C}^{5'}$ - $\text{CH}_2$ - $\text{CH}_2$ - $\text{CH}_3$ ), 30.8 (*s*,  $\text{C}^{4'}$ ,  $\text{C}^{5'}$ - $\text{CH}_2$ - $\text{CH}_2$ - $\text{CH}_3$ ), 39.4 (*s*,  $\text{N-CH}_2$ - $\text{CH}_3$ ), 117.6 and 117.9 (*s*,  $\text{C}^2$ ,  $\text{C}^{2'}$ ), 129.1 (*s*,  $\text{C}^{4'}$  and  $\text{C}^{5'}$ ), 139.9 (*m*,  $\text{C}^{2,3,5,6}$ , central ring).  $^{31}\text{P}\{^1\text{H}\}$  NMR (202.5 MHz,  $\text{CDCl}_3$ ):  $\delta$  = 25.2 (*s*), 25.4 (*s*).  $^{31}\text{P}$  NMR (202.5 MHz,  $\text{CDCl}_3$ ):  $\delta$  = 25.3 (*m*). MS (ESI-pos): *m/z* (%) = 875.046 (15)  $[\text{M}+\text{O}_2+\text{H}]^+$ , 858.044 (51)  $[\text{M}+\text{O}]^+$ , 842.049 (100)  $[\text{M}]^+$ . HR-MS: Calculated: 842.0494, Found: 842.0491. EA (%): Calculated/Found C: 45.58/43.85, H: 5.74/5.72, N: 3.33/3.07, S: 38.02/40.80.

## Oxidation of the 1,4-bis(diethylamino)-1,4H-1,4-diphosphinines with elemental selenium 8

Selenium was added to a Schlenk tube, containing starting material, then Toluene was added and the reaction mixture was stirred for 3 hours at 100 °C. After this time, solvent was removed in *vacuo* ( $8 \times 10^{-3}$  mbar). The residue was extracted with DCM (2x20 mL) and the solution was concentrated and dried in *vacuo* ( $8 \times 10^{-3}$  mbar). In the case of **8d**, the product was washed with n-Pentane (2x10 mL) and dried in *vacuo* ( $8 \times 10^{-3}$  mbar).

### 2,6-Bis(4,5-dimethyl-1,3-dithiol-2-ylidene)-bis(1,3-dithiole)[2,3-d:5,6-d']-4,8-bis(diethylamino)-4,8H-4,8-diphosphinine-4,8-diselenide (**8d**)

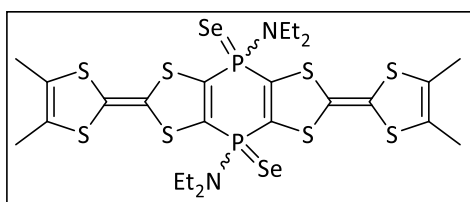

Product: Brown powder, Yield: 30 mg (0.036 mmol, 61%), Melting point: 264 °C (decomp.)  $^1\text{H}$  NMR (500.1 MHz,  $\text{CDCl}_3$ ):  $\delta$  = 1.16 and 1.19 (*t*, 12H,  $^3J_{\text{H,H}}$  = 7.1 Hz,  $\text{N-CH}_2$ - $\text{CH}_3$ ), 1.94 (*s*, 12H,  $\text{C}^{4'}$ ,  $\text{C}^{5'}$ - $\text{CH}_3$ ), 3.32 (*m*, 8H,  $\text{N-CH}_2$ - $\text{CH}_3$ ).  $^{13}\text{C}$  NMR (125.8 MHz,  $\text{CDCl}_3$ ):  $\delta$  = 13.8 (*s*,  $\text{N-CH}_2$ - $\text{CH}_3$ ), 14.2 (*s*,  $\text{C}^{4'}$ ,  $\text{C}^{5'}$ - $\text{CH}_3$ ), 40.2 (*d*,  $^2J_{\text{P,C}}$  = 16.72 Hz,  $\text{N-CH}_2$ - $\text{CH}_3$ ), 117.8 (*s*,  $\text{C}^2$ ,  $\text{C}^{2'}$ ), 123.2 (*2s*,  $\text{C}^{4'}$  and  $\text{C}^{5'}$ ), 138.5 (*m*,  $\text{C}^{2,3,5,6}$ , central ring).  $^{31}\text{P}\{^1\text{H}\}$  NMR (202.5 MHz,



CDCl<sub>3</sub>):  $\delta$  = 15.7 ( $s_{sat}$ ,  $^1J_{P,Se}$  = 816 Hz), 15.8 ( $s_{sat}$ ,  $^1J_{P,Se}$  = 804 Hz).  $^{31}P$  NMR (202.5 MHz, CDCl<sub>3</sub>):  $\delta$  = 15.7 (*m*). MS (ESI-pos): *m/z* (%) = 841.807 (27) [M+O]<sup>+</sup>, 825.812 (100) [M]<sup>+</sup>. HR-MS: Calculated: 825.8127, Found: 825.8127. EA (%): Calculated/Found C: 34.95/37.67, H: 3.91/4.52, N: 3.40/3.08, S: 31.09/30.18.

**2,6-Bis(4,5-dipropyl-1,3-dithiol-2-ylidene)-bis(1,3-dithiole)[2,3-d:5,6-d']-4,8-bis(diethylamino)-4,8H-4,8-diphosphinine-4,8-diselenide (8f)**

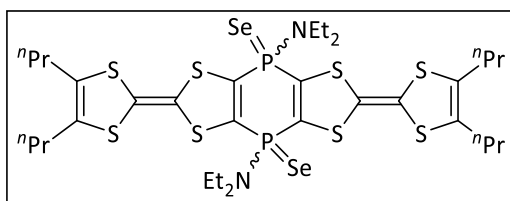

Product: Brown powder, Yield: 52 mg (0.055 mmol, 92%), Melting point: 209 °C.  $^1H$  NMR (500.1 MHz, CDCl<sub>3</sub>):  $\delta$  = 0.93 (*t*, 12H,  $^3J_{H,H}$  = 7.34 Hz, C<sup>4'</sup>, C<sup>5'</sup>-CH<sub>2</sub>-CH<sub>2</sub>-CH<sub>3</sub>), 1.16 and 1.19 (*t*, 12H,  $^3J_{H,H}$  = 7.1 Hz, N-CH<sub>2</sub>-CH<sub>3</sub>), 1.52 (*h*, 8H,  $^3J_{H,H}$  = 7.41 Hz, C<sup>4'</sup>, C<sup>5'</sup>-CH<sub>2</sub>-CH<sub>2</sub>-CH<sub>3</sub>), 2.32 (*m*, 8H, C<sup>4'</sup>, C<sup>5'</sup>-CH<sub>2</sub>-CH<sub>2</sub>-CH<sub>3</sub>), 3.33 (*m*, 8H, N-CH<sub>2</sub>-CH<sub>3</sub>).  $^{13}C$  NMR (125.8 MHz, CDCl<sub>3</sub>):  $\delta$  = 13.7 (*s*, C<sup>4'</sup>, C<sup>5'</sup>-CH<sub>2</sub>-CH<sub>2</sub>-CH<sub>3</sub>), 14.2 (*d*,  $^3J_{P,C}$  = 3.59 Hz, N-CH<sub>2</sub>-CH<sub>3</sub>), 23.1 (*s*, C<sup>4'</sup>, C<sup>5'</sup>-CH<sub>2</sub>-CH<sub>2</sub>-CH<sub>3</sub>), 30.8 (*s*, C<sup>4'</sup>, C<sup>5'</sup>-CH<sub>2</sub>-CH<sub>2</sub>-CH<sub>3</sub>), 40.2 (*d*,  $^2J_{P,C}$  = 21.51 Hz, N-CH<sub>2</sub>-CH<sub>3</sub>), 117.7 and 117.9 (*s*, C<sup>2</sup>, C<sup>2'</sup>), 129.1 (*s*, C<sup>4'</sup> and C<sup>5'</sup>), 138.5 (*m*, C<sup>2,3,5,6</sup>, central ring).  $^{31}P\{^1H\}$  NMR (202.5 MHz, CDCl<sub>3</sub>):  $\delta$  = 15.7 ( $s_{sat}$ ,  $^1J_{P,Se}$  = 804 Hz), 15.9 ( $s_{sat}$ ,  $^1J_{P,Se}$  = 812 Hz).  $^{31}P$  NMR (202.5 MHz, CDCl<sub>3</sub>):  $\delta$  = 15.7 (*m*), 15.9 (*m*). MS (ESI-pos): *m/z* (%) = 970.936 (18) [M+O<sub>2</sub>+H]<sup>+</sup>, 953.934 (33) [M+O]<sup>+</sup>, 937.938 (100) [M]<sup>+</sup>. HR-MS: Calculated: 937.9381, Found: 937.9384. EA (%): Calculated/Found C: 41.01/41.88, H: 5.16/5.45, N: 2.99/2.96, S: 27.37/26.23.

**Synthesis of 10-butyl-2,6-bis(4,5-dipropyl-1,3-dithiol-2-ylidene)-4,8-ethano[1,4]diphosphinino[2,3-d:5,6-d']bis([1,3]dithiole) 11f**

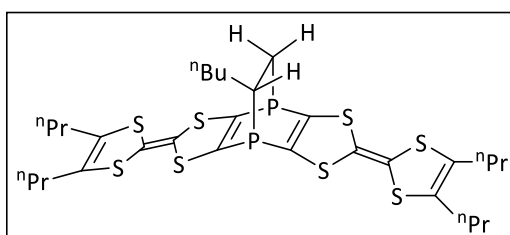

Starting material was dissolved in dry DCM, then PCl<sub>3</sub> (2.5 eq) was slowly added and the reaction mixture was stirred for 3 hours at r.t. After this time, all volatiles were

evaporated in *vacuo* ( $8 \times 10^{-3}$  mbar) and the residue was dissolved in dry DCM. Then first 1-hexene (200 eq) and after that  $\text{PMe}_3$  (1.3 eq) were added to the reaction mixture and it was stirred for 3 days. After that, all volatiles were evaporated in *vacuo* ( $8 \times 10^{-3}$  mbar). Then the product was extracted from the residue using dry n-Pentane (3x30 mL) and the solution was concentrated and dried in *vacuo* ( $8 \times 10^{-3}$  mbar). Product: Orange-red oily/sticky solid, Yield: 63 mg (0.088 mmol, 38%).  $^1\text{H}$  NMR (500.1 MHz,  $\text{CDCl}_3$ ):  $\delta$  = 0.89 (*t*, 3H,  $^3J_{\text{H,H}}$  = 7.31 Hz, P-CH-CH<sub>2</sub>-CH<sub>2</sub>-CH<sub>2</sub>-CH<sub>3</sub>), 0.93 (*m*, 12H, C<sup>4'</sup>, C<sup>5'</sup>-CH<sub>2</sub>-CH<sub>2</sub>-CH<sub>3</sub>), 1.18-1.46 (*m*, 7H, P-CH-CH<sub>2</sub>-CH<sub>2</sub>-CH<sub>2</sub>-CH<sub>3</sub>), 1.52 (*m*, 8H, C<sup>4'</sup>, C<sup>5'</sup>-CH<sub>2</sub>-CH<sub>2</sub>-CH<sub>3</sub>), 1.99 (*m*, 2H, P-CH<sub>2</sub>) 2.31 (*t*, 8H,  $^3J_{\text{H,H}}$  = 6.46 Hz, C<sup>4'</sup>, C<sup>5'</sup>-CH<sub>2</sub>-CH<sub>2</sub>-CH<sub>3</sub>).  $^{13}\text{C}$  NMR (125.8 MHz,  $\text{CDCl}_3$ ):  $\delta$  = 13.8 (*s*, P-CH-CH<sub>2</sub>-CH<sub>2</sub>-CH<sub>2</sub>-CH<sub>3</sub>), 14.1 (*s*, C<sup>4'</sup>, C<sup>5'</sup>-CH<sub>2</sub>-CH<sub>2</sub>-CH<sub>3</sub>), 22.6 and 22.8 (*s*, P-CH-CH<sub>2</sub>-CH<sub>2</sub>-CH<sub>2</sub>-CH<sub>3</sub>), 23.1 (*s*, C<sup>4'</sup>, C<sup>5'</sup>-CH<sub>2</sub>-CH<sub>2</sub>-CH<sub>3</sub>), 29.8 (*s*, P-CH-CH<sub>2</sub>-CH<sub>2</sub>-CH<sub>2</sub>-CH<sub>3</sub>), 30.8 (*s*, C<sup>4'</sup>, C<sup>5'</sup>-CH<sub>2</sub>-CH<sub>2</sub>-CH<sub>3</sub>), 31.3 (*d*,  $^1J_{\text{P,C}}$  = 15.21 Hz, P-CH-CH<sub>2</sub>-CH<sub>2</sub>-CH<sub>2</sub>-CH<sub>3</sub>), 34.9 (*d*,  $^1J_{\text{P,C}}$  = 17.04 Hz, P-CH<sub>2</sub>), 110.9 and 111.9 (*s*, C<sup>2</sup>, C<sup>2'</sup>), 129 (*2s*, C<sup>4'</sup> and C<sup>5'</sup>), 140-143.6 (*m*, C<sup>2,3,5,6</sup>, central ring).  $^{31}\text{P}\{^1\text{H}\}$  NMR (202.5 MHz,  $\text{CDCl}_3$ ):  $\delta$  = -71.7 (*d*,  $^3J_{\text{P,P}}$  = 32.39 Hz), -67.70 (*d*,  $^3J_{\text{P,P}}$  = 32.30 Hz).  $^{31}\text{P}$  NMR (202.5 MHz,  $\text{CDCl}_3$ ):  $\delta$  = -71.7 (*dt*,  $^3J_{\text{P,P}}$  = 32.39 Hz and  $^2J_{\text{P,H}}$  = 8.14), -67.70 (*m*). MS (ESI-pos): *m/z* (%) = 734.030 (3)  $[\text{M}+\text{O}]^+$ , 718.036 (16)  $[\text{M}]^+$ , 633.942 (3)  $[\text{M}-\text{C}_6\text{H}_{12}]^+$ . HR-MS: Calculated: 718.0365, Found: 718.0363. EA (%): Calculated/Found C: 50.11/53.77, H: 5.61/6.30, S: 35.67/39.76.

# NMR Spectra

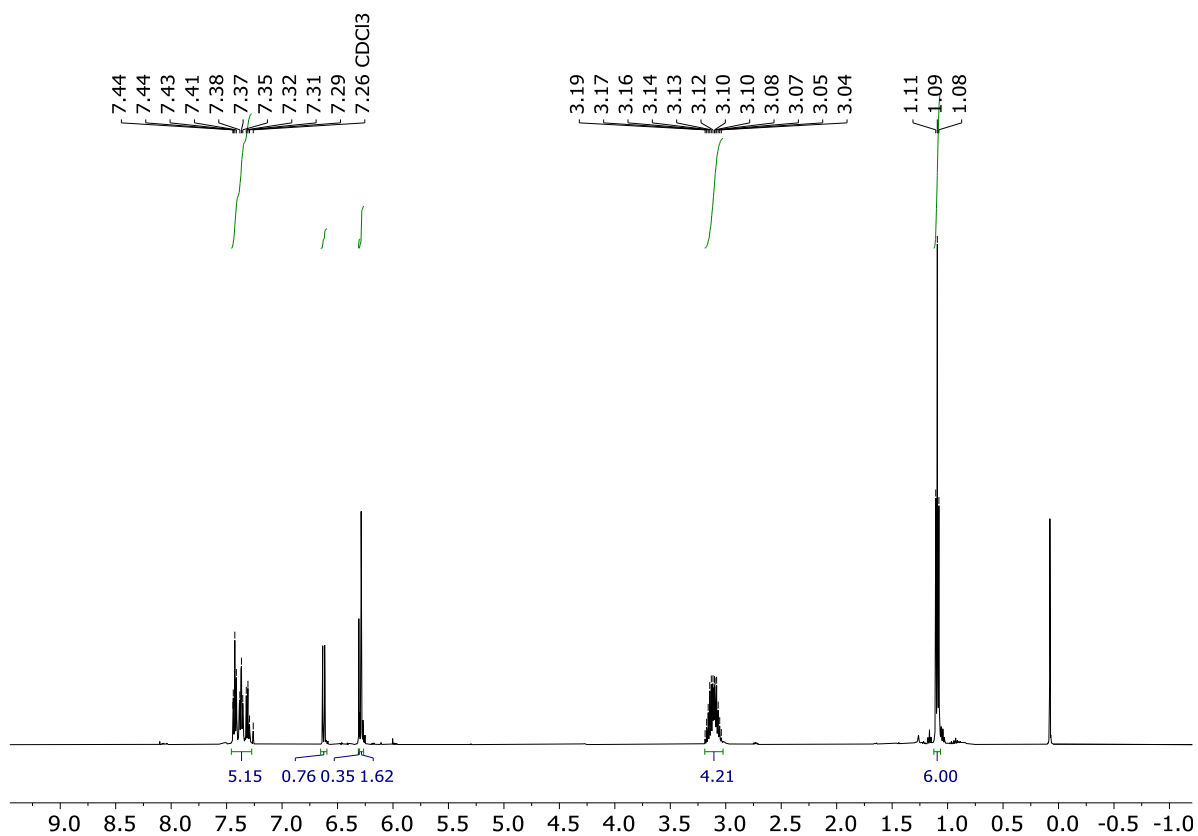

Figure S1: <sup>1</sup>H NMR spectrum of compound **3a** in CDCl<sub>3</sub>.

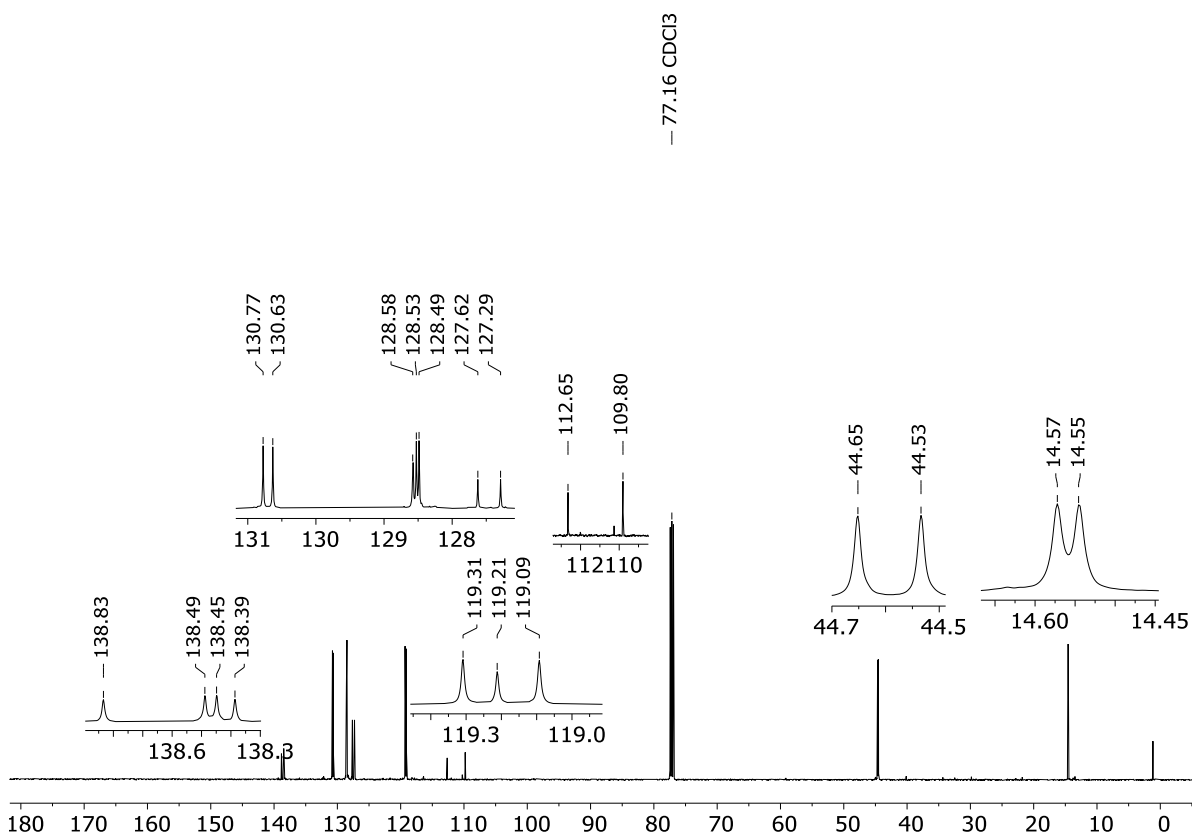

Figure S2: <sup>13</sup>C{<sup>1</sup>H} NMR spectrum of compound **3a** in CDCl<sub>3</sub>.

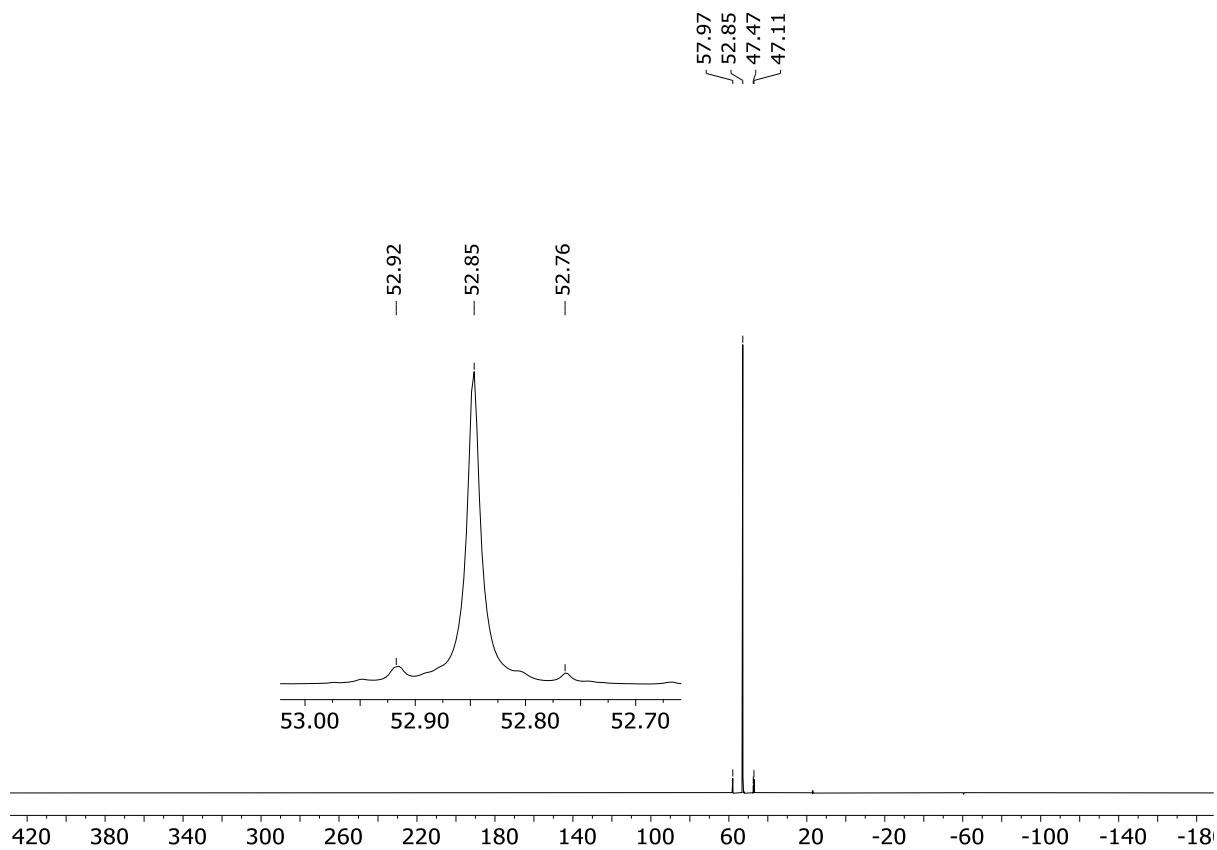

**Figure S3:**  $^{31}\text{P}\{^1\text{H}\}$  NMR spectrum of compound **3a** in  $\text{CDCl}_3$ .

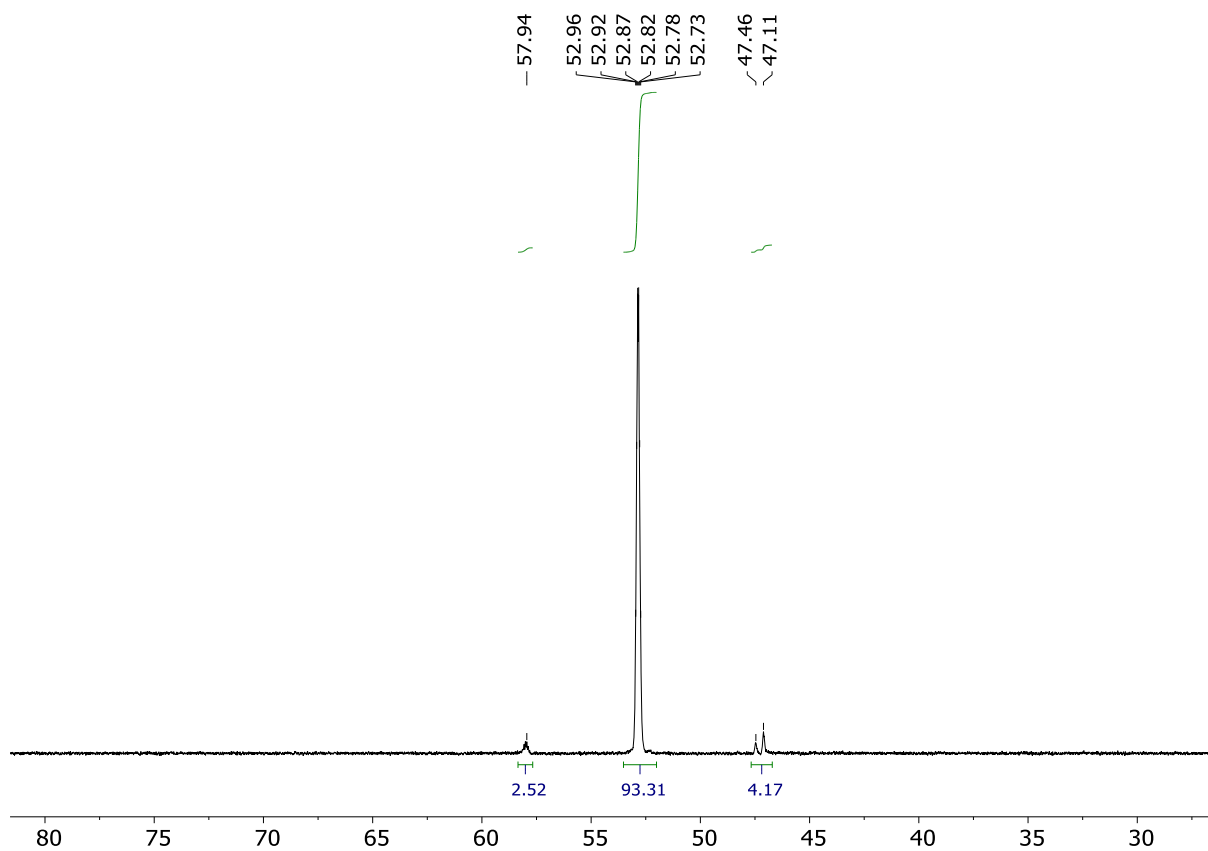

**Figure S4:**  $^{31}\text{P}$  NMR spectrum of compound **3a** in  $\text{CDCl}_3$ .

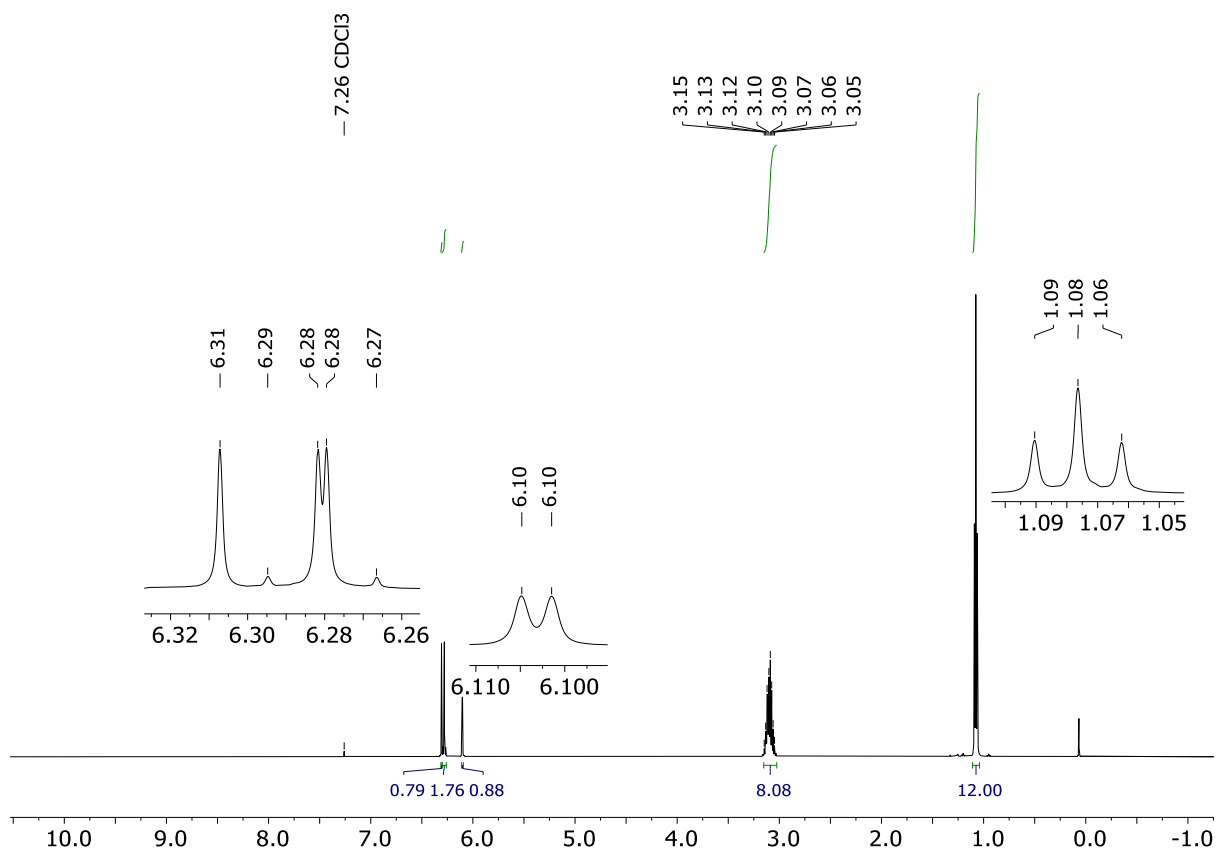

Figure S5: <sup>1</sup>H NMR spectrum of compound **3b** in CDCl<sub>3</sub>.

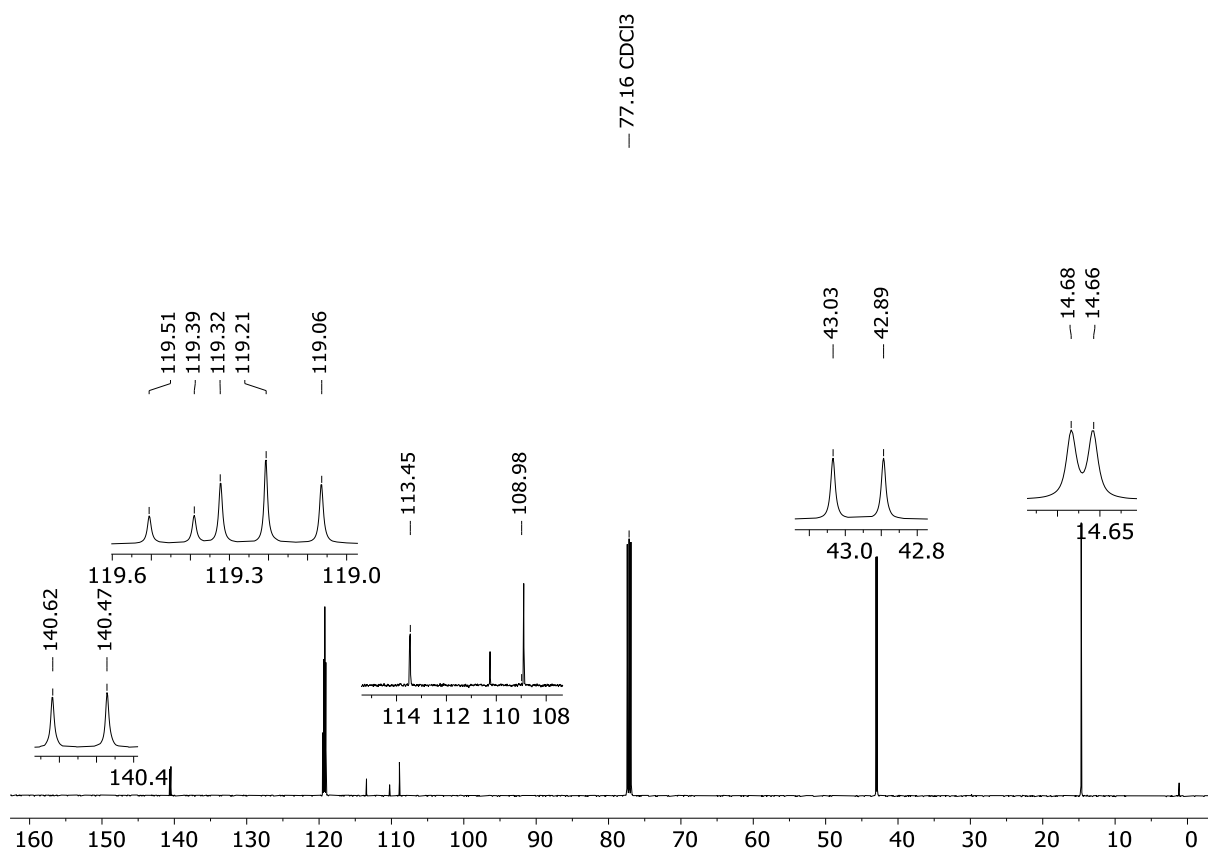

Figure S6: <sup>13</sup>C{<sup>1</sup>H} NMR spectrum of compound **3b** in CDCl<sub>3</sub>.

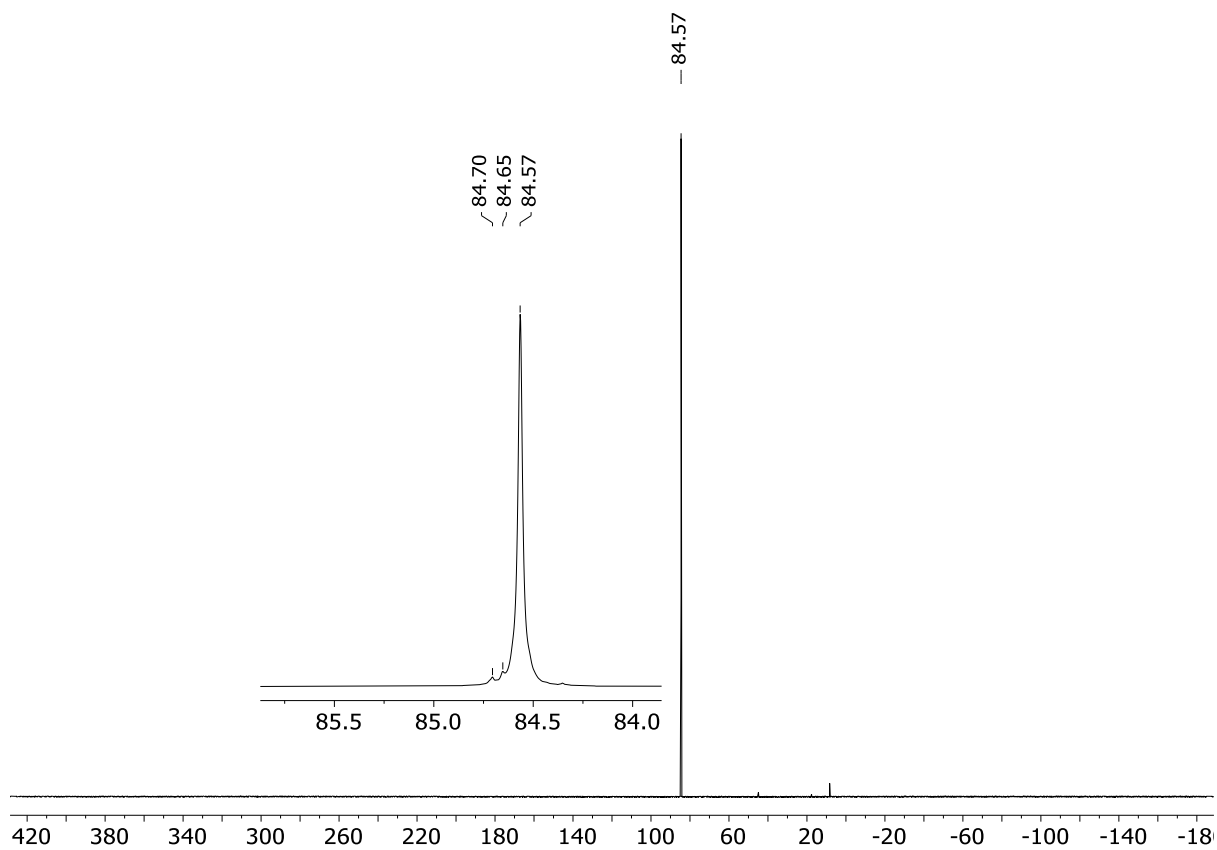

**Figure S7:**  $^{31}\text{P}\{^1\text{H}\}$  NMR spectrum of compound **3b** in  $\text{CDCl}_3$ .

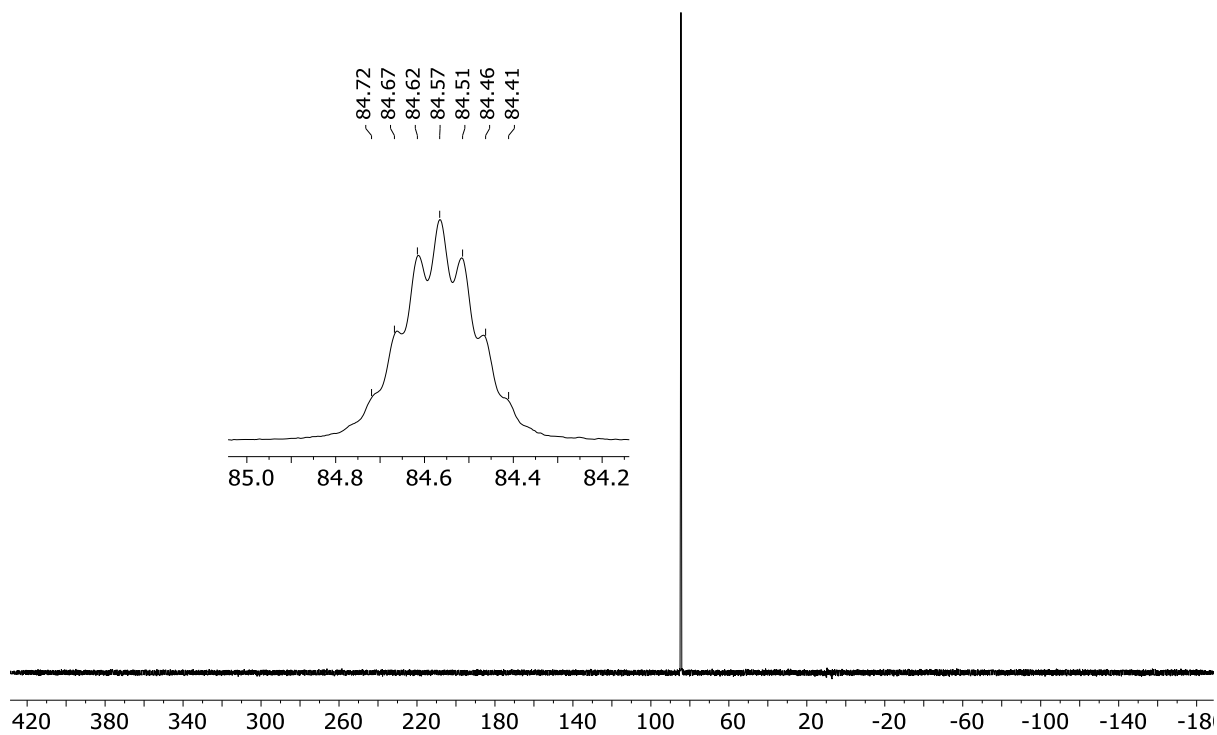

**Figure S8:**  $^{31}\text{P}$  NMR spectrum of compound **3b** in  $\text{CDCl}_3$ .

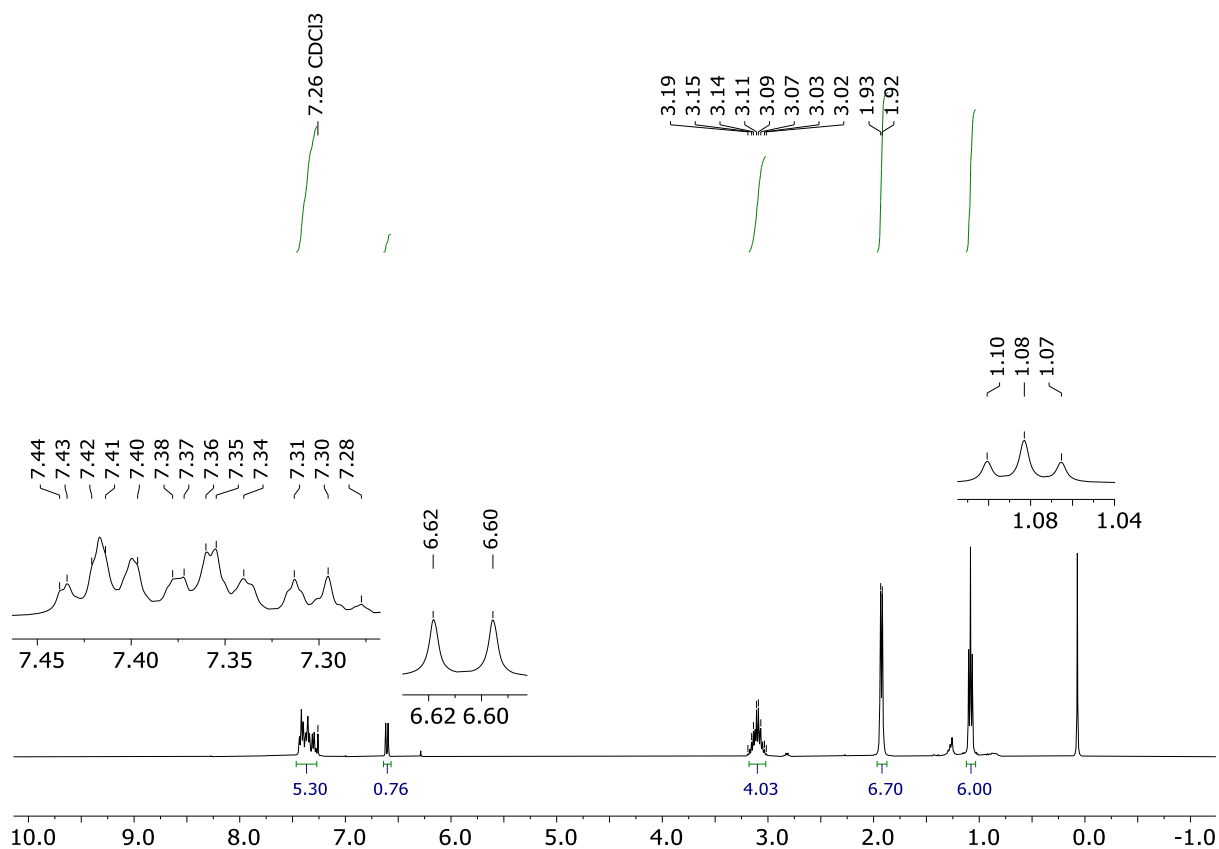

Figure S9: <sup>1</sup>H NMR spectrum of compound **3c** in CDCl<sub>3</sub>.

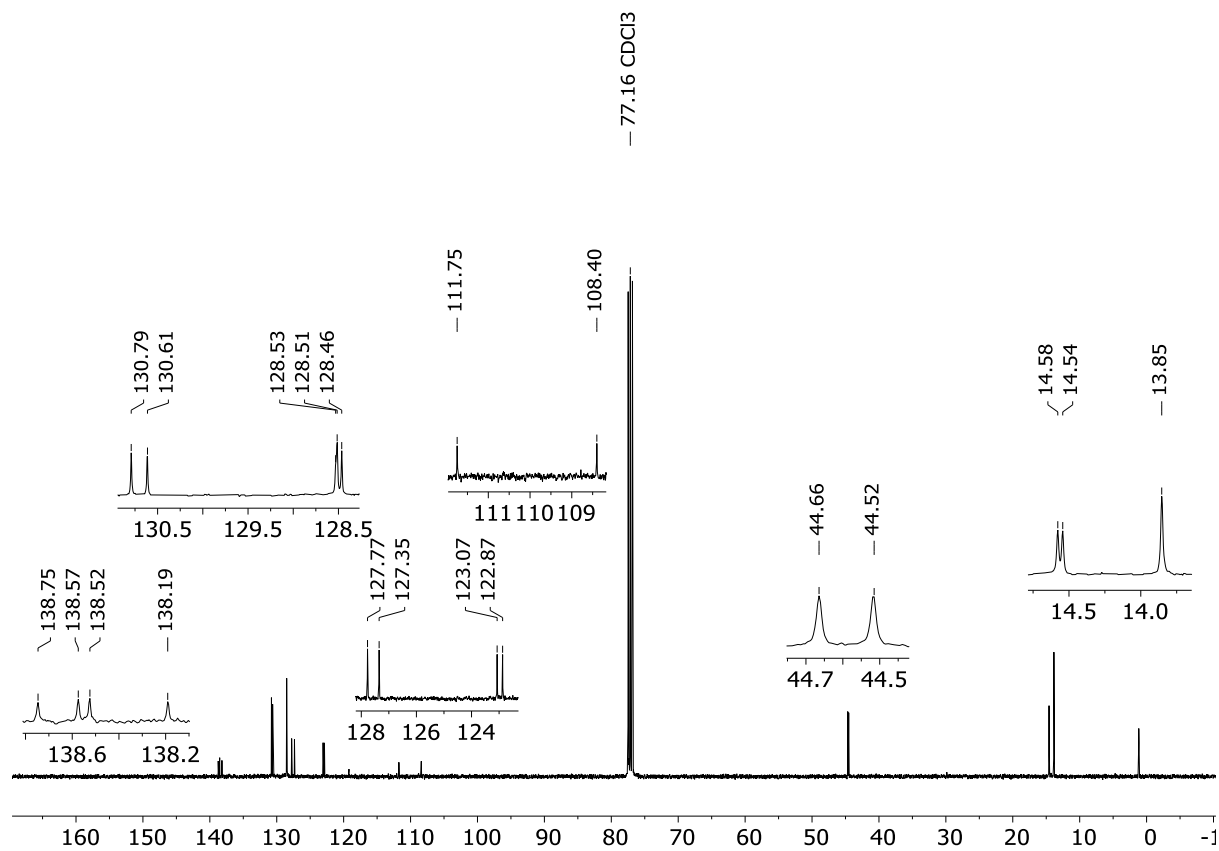

Figure S10: <sup>13</sup>C{<sup>1</sup>H} NMR spectrum of compound **3c** in CDCl<sub>3</sub>.

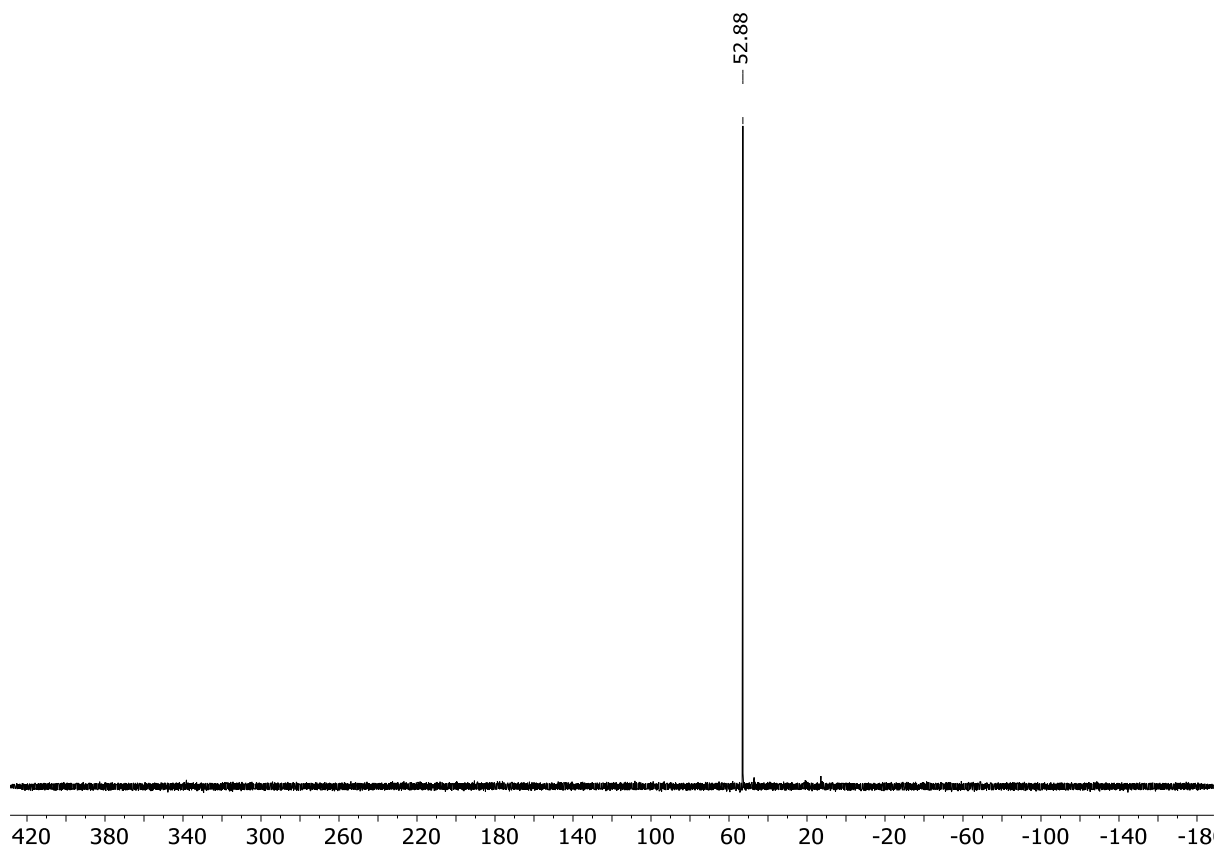

Figure S11.  $^{31}\text{P}\{^1\text{H}\}$  NMR spectrum of compound **3c** in  $\text{CDCl}_3$ .

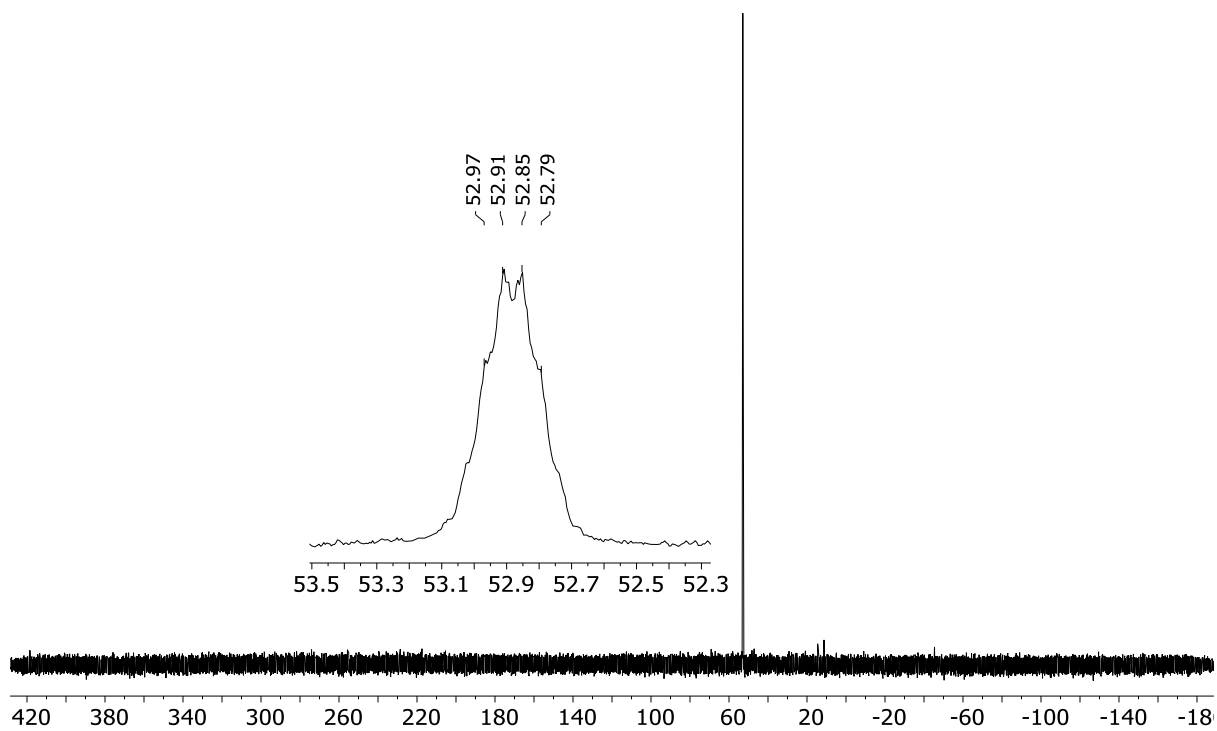

Figure S12.  $^{31}\text{P}$  NMR spectrum of compound **3c** in  $\text{CDCl}_3$ .



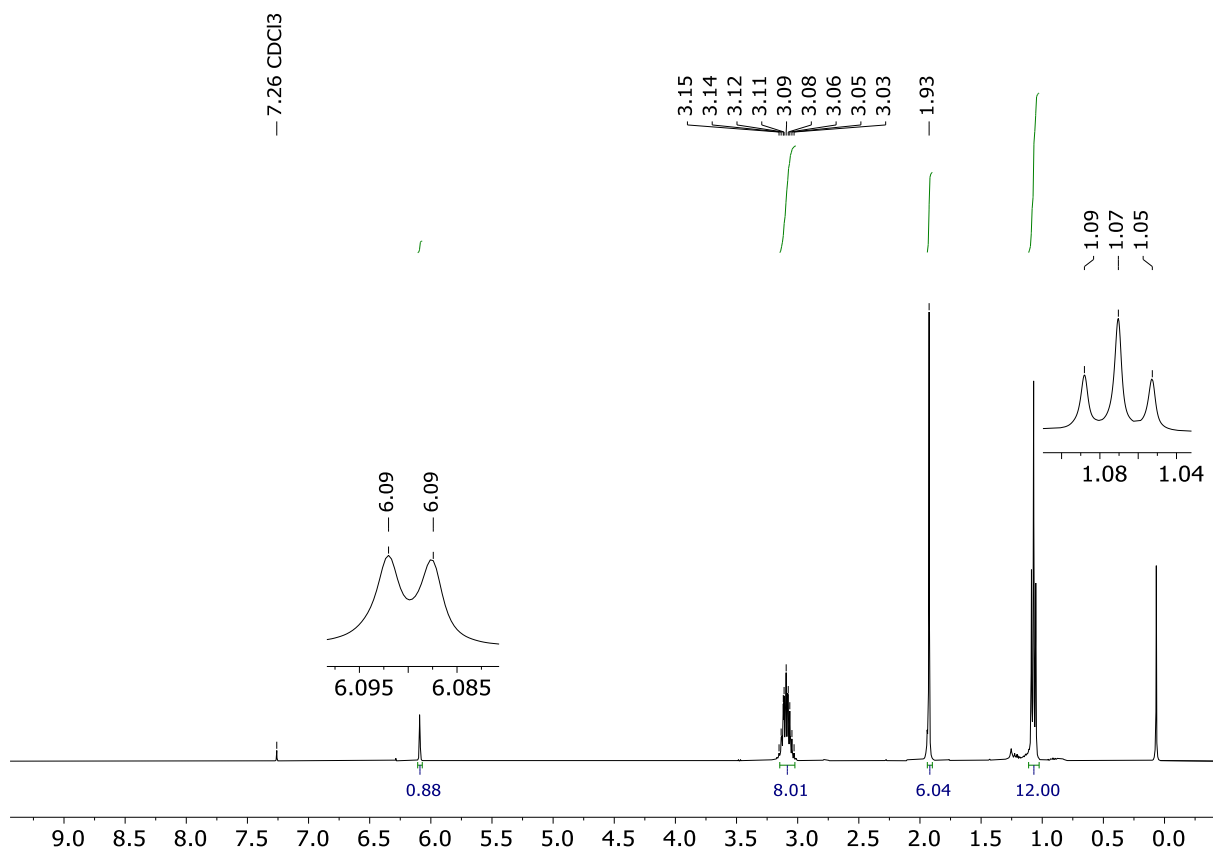

Figure S13:  $^1\text{H}$  NMR spectrum of compound **3d** in  $\text{CDCl}_3$ .

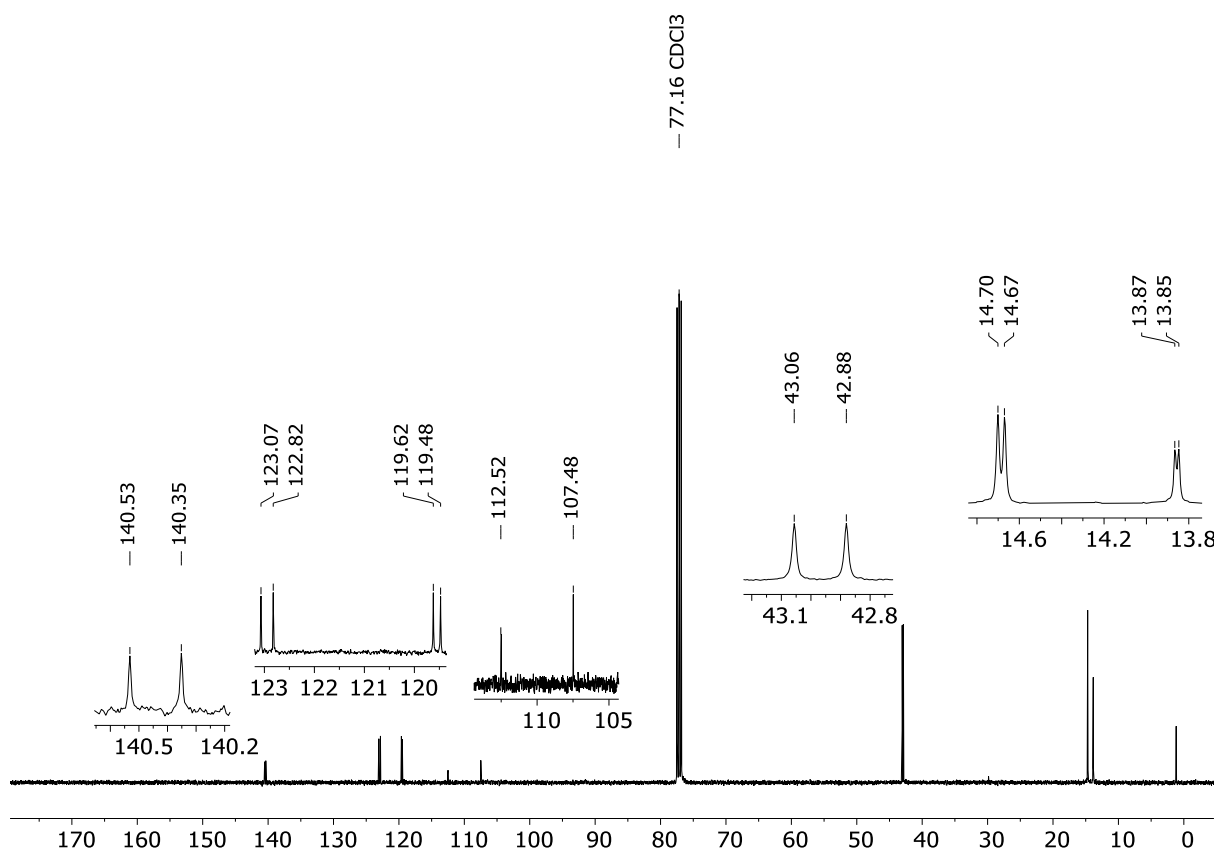

Figure S14:  $^{13}\text{C}\{^1\text{H}\}$  NMR spectrum of compound **3d** in  $\text{CDCl}_3$ .

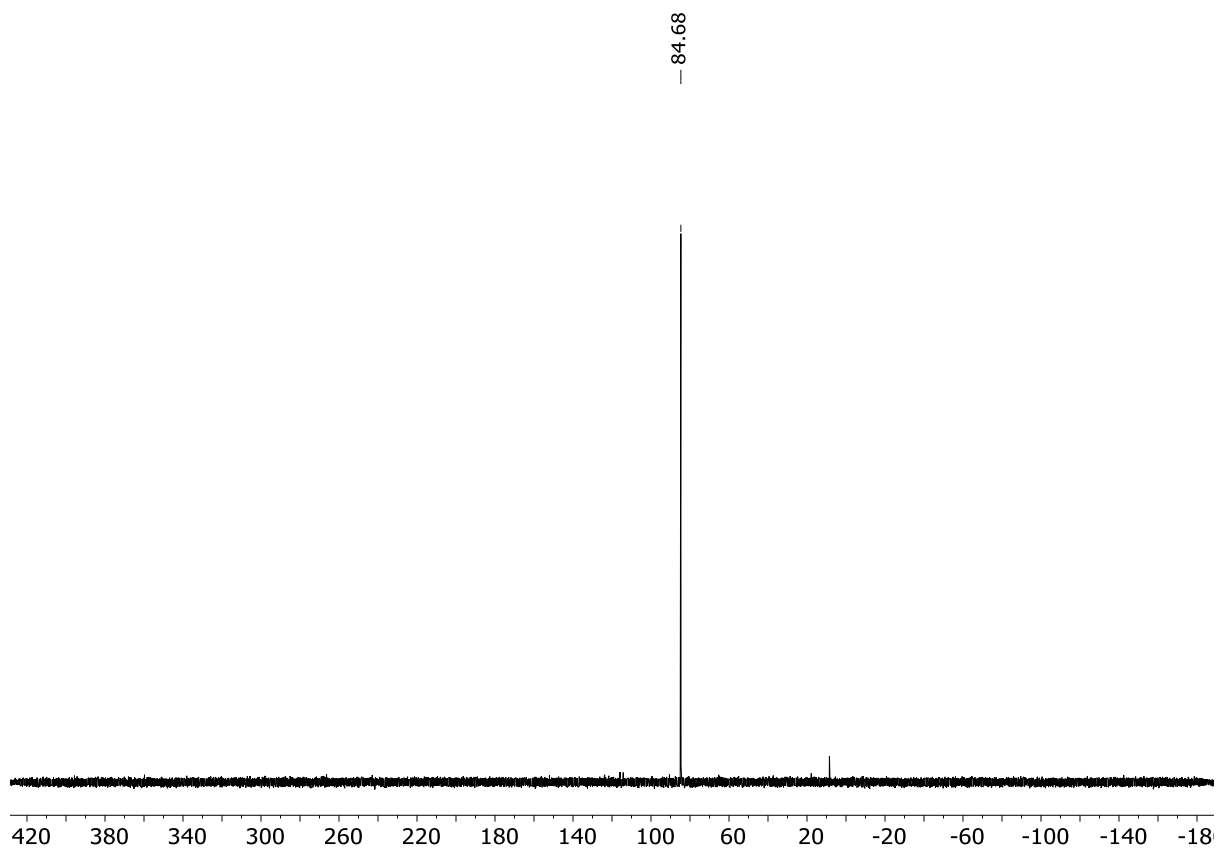

Figure S15:  $^{31}\text{P}\{^1\text{H}\}$  NMR spectrum of compound **3d** in  $\text{CDCl}_3$ .

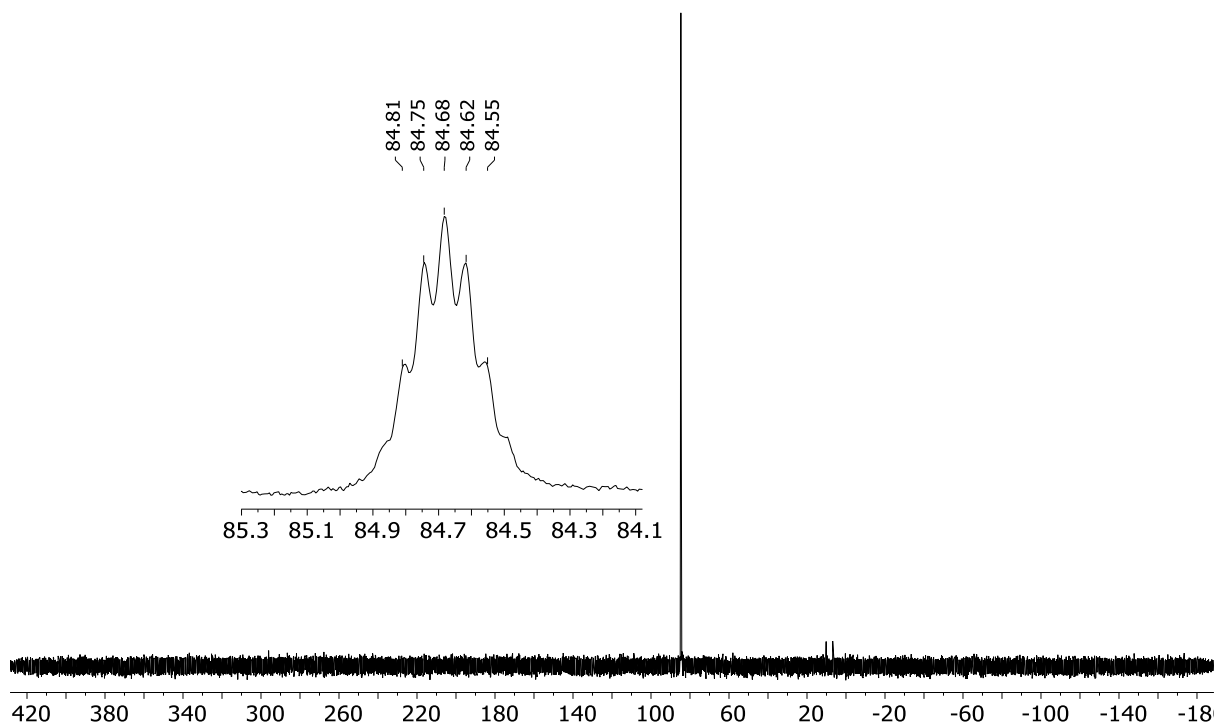

Figure S16:  $^{31}\text{P}$  NMR spectrum of compound **3d** in  $\text{CDCl}_3$ .

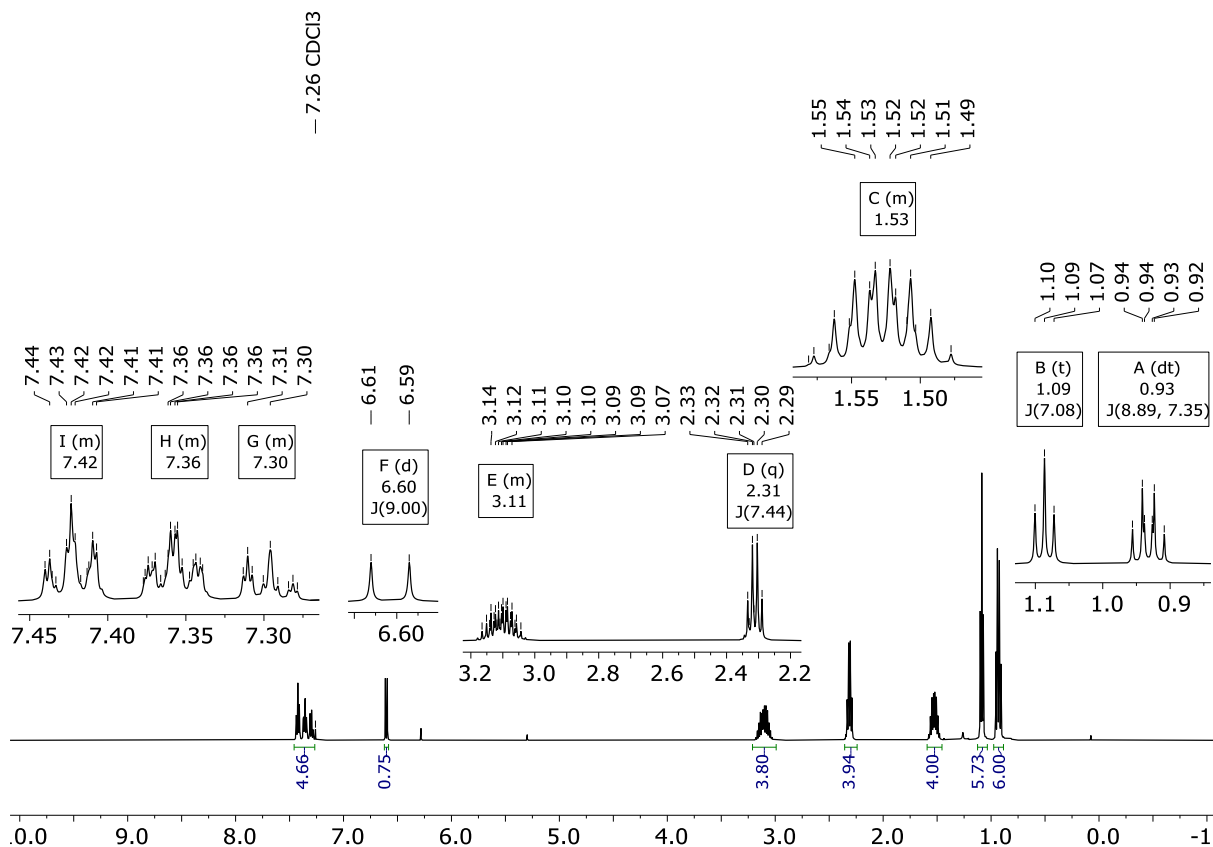

Figure S17: <sup>1</sup>H NMR spectrum of compound **3e** in CDCl<sub>3</sub>.

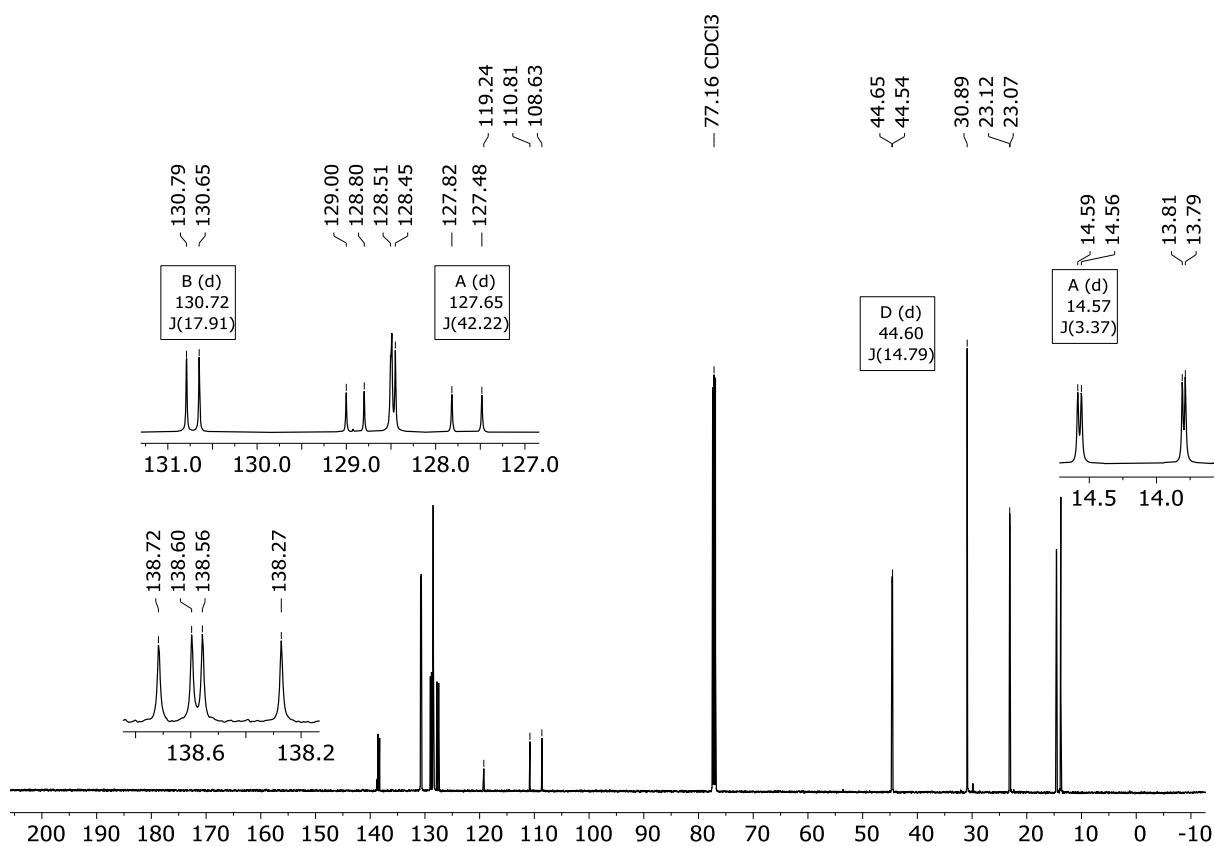

Figure S18: <sup>13</sup>C{<sup>1</sup>H} NMR spectrum of compound **3e** in CDCl<sub>3</sub>.

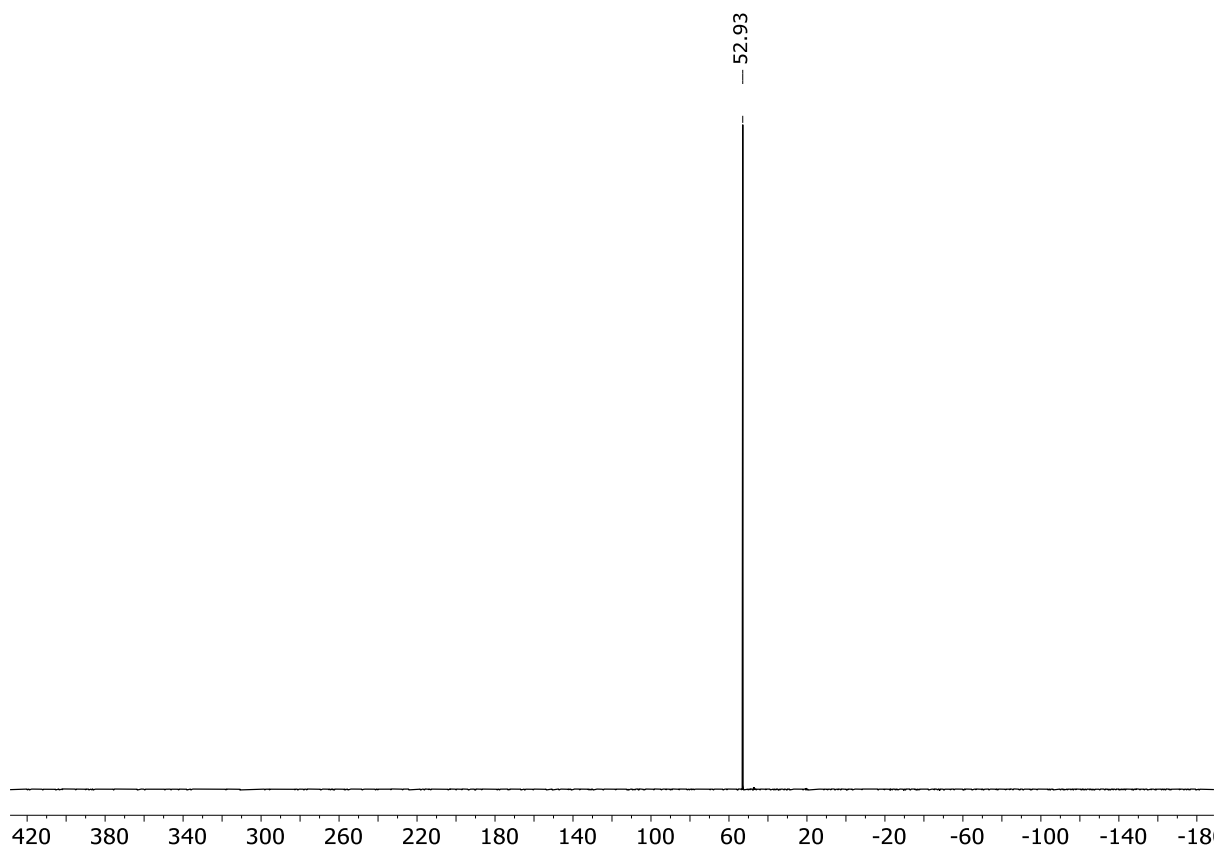

Figure S19:  $^{31}\text{P}\{^1\text{H}\}$  NMR spectrum of compound **3e** in  $\text{CDCl}_3$ .

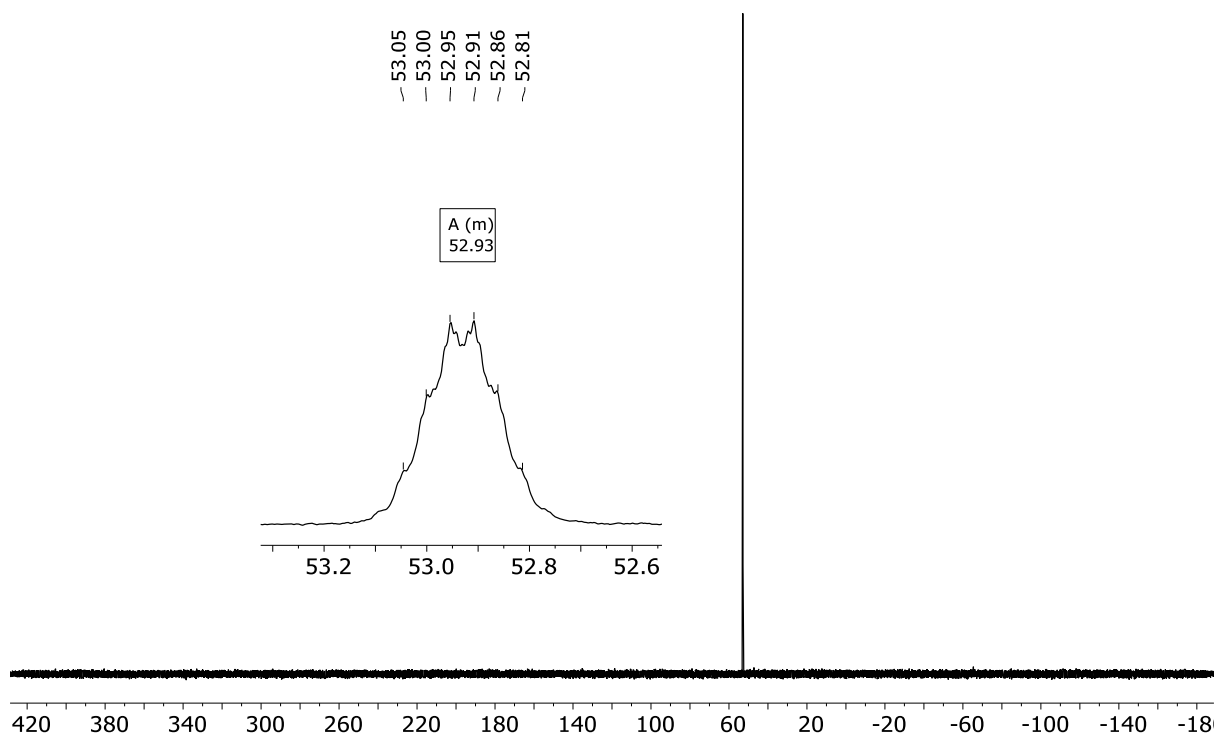

Figure S20:  $^{31}\text{P}$  NMR spectrum of compound **3e** in  $\text{CDCl}_3$ .

- 7.26 CDCl<sub>3</sub>

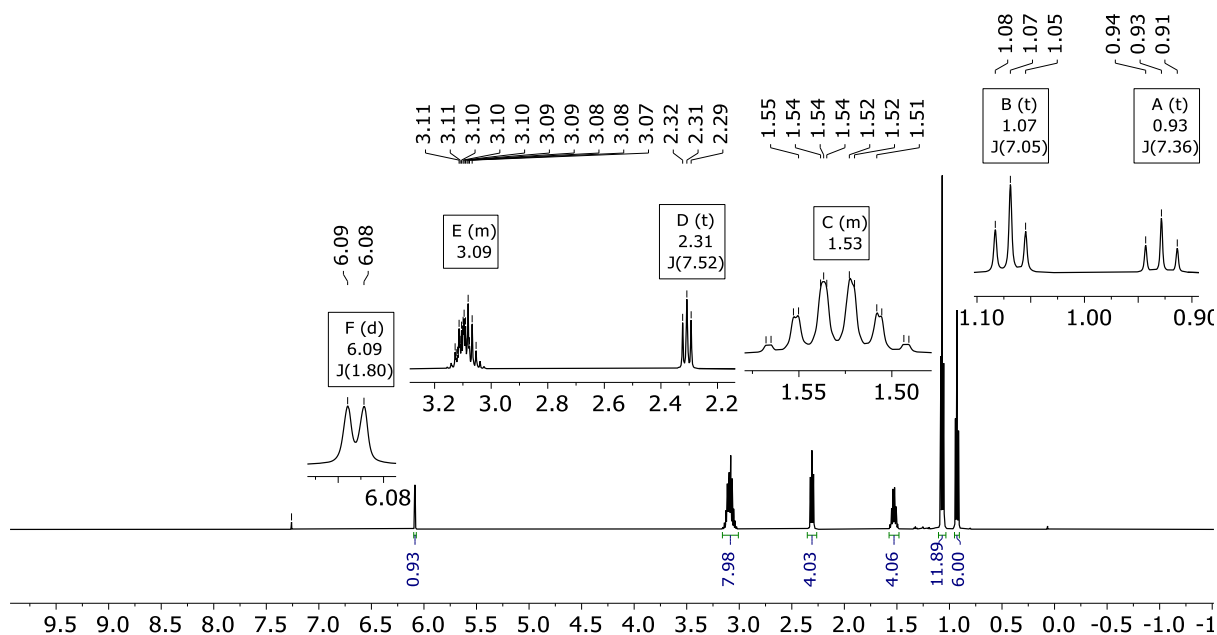

Figure S21: <sup>1</sup>H NMR spectrum of compound **3f** in CDCl<sub>3</sub>.

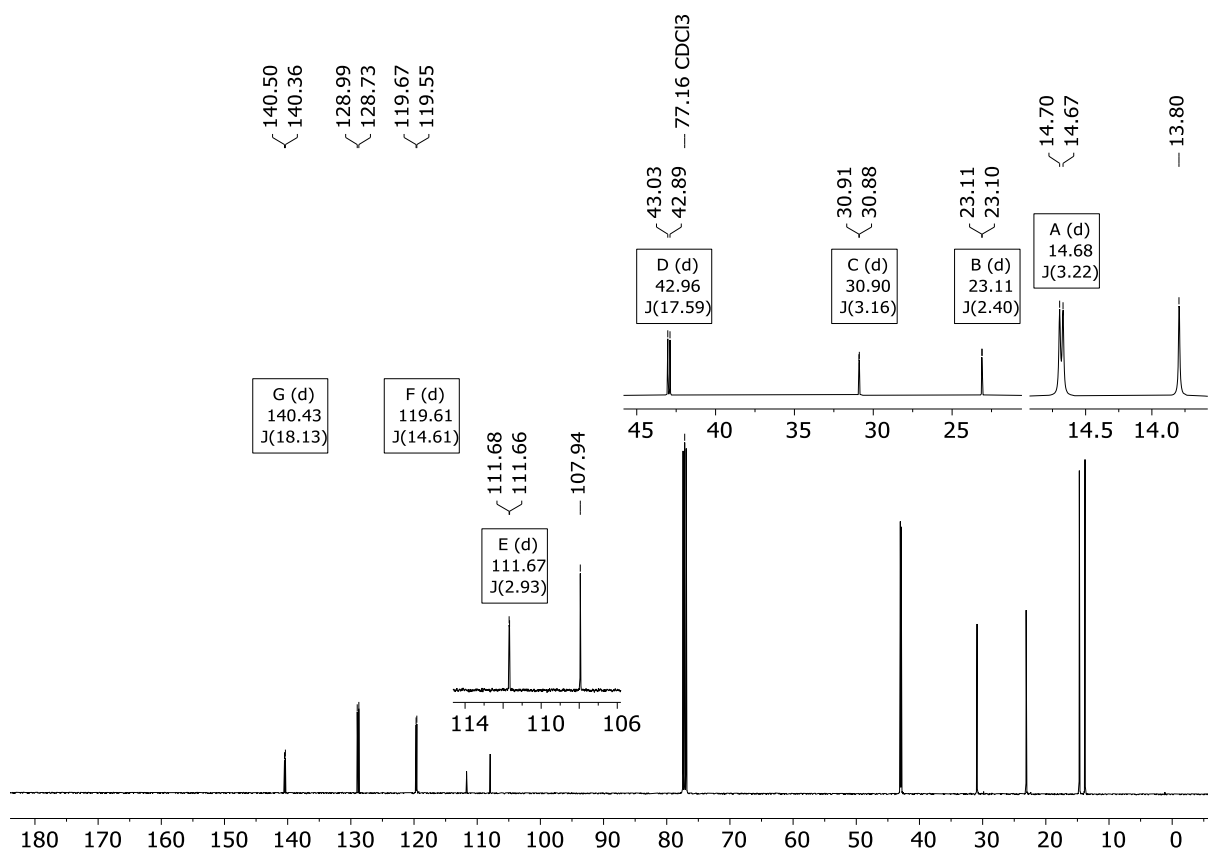

Figure S22: <sup>13</sup>C{<sup>1</sup>H} NMR spectrum of compound **3f** in CDCl<sub>3</sub>.

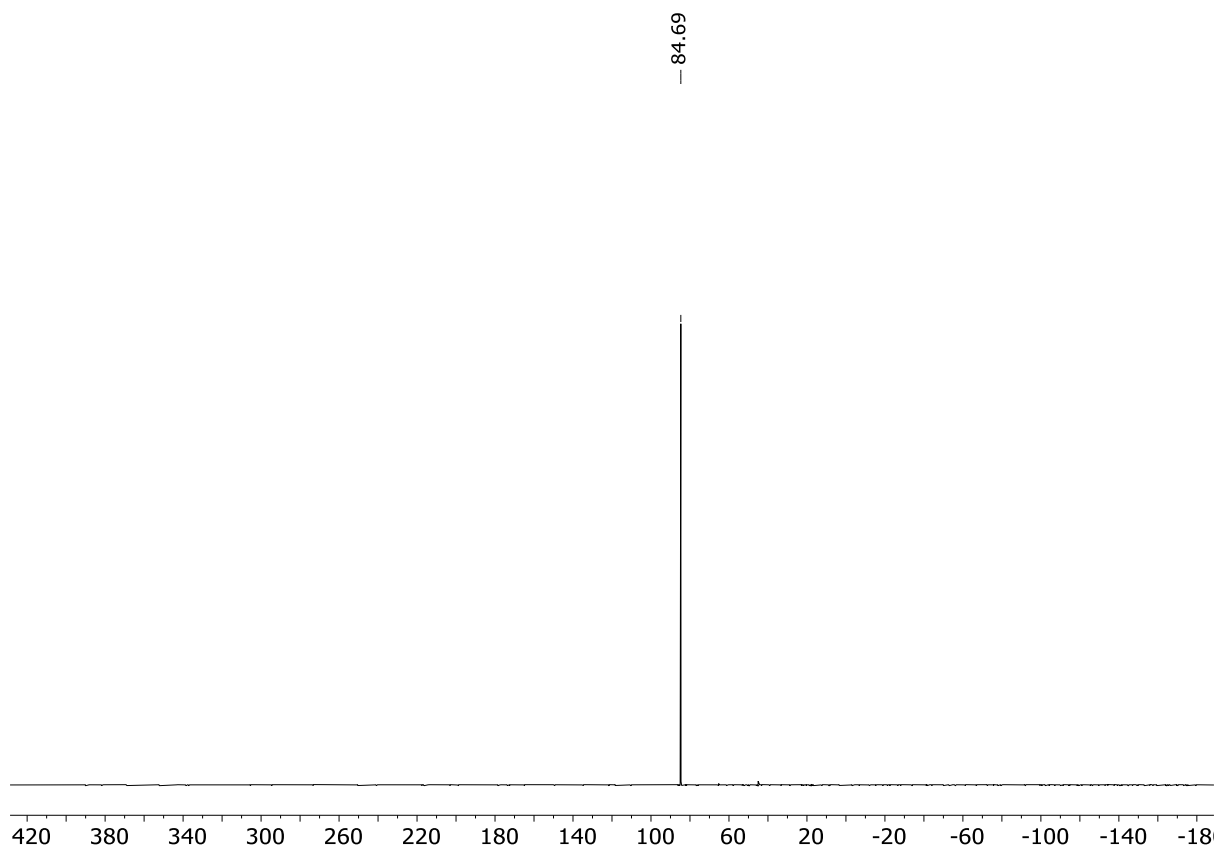

Figure S23:  $^{31}\text{P}\{^1\text{H}\}$  NMR spectrum of compound **3f** in  $\text{CDCl}_3$ .

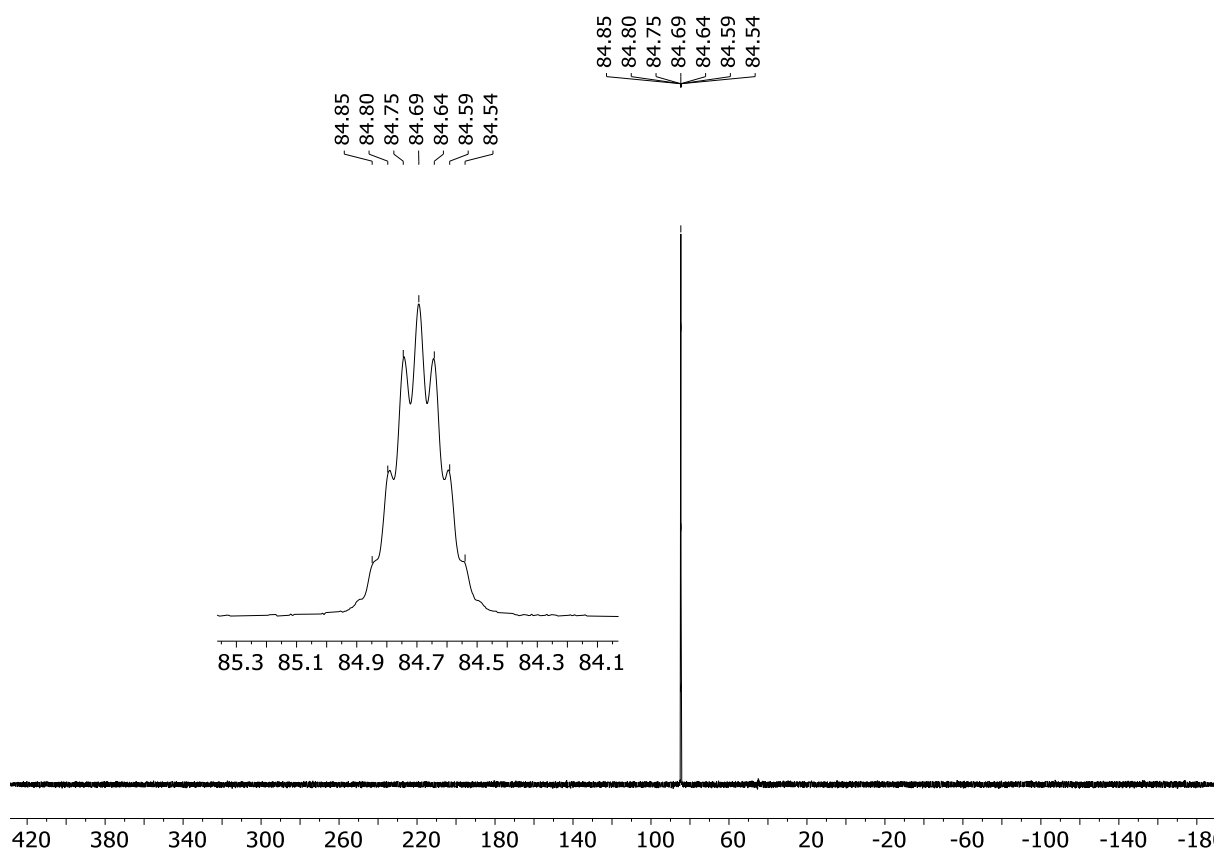

Figure S24:  $^{31}\text{P}$  NMR spectrum of compound **3f** in  $\text{CDCl}_3$ .

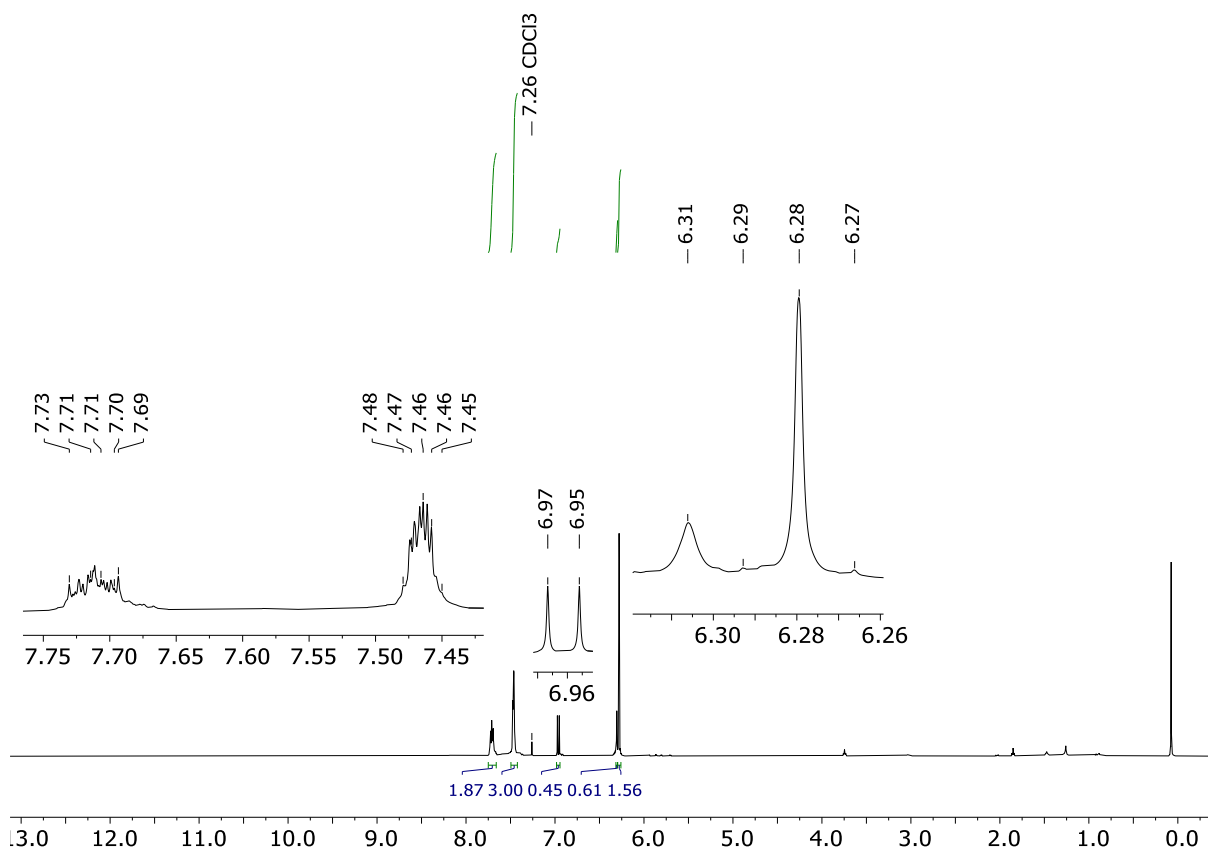

Figure S25: <sup>1</sup>H NMR spectrum of compound **4a** in CDCl<sub>3</sub>.

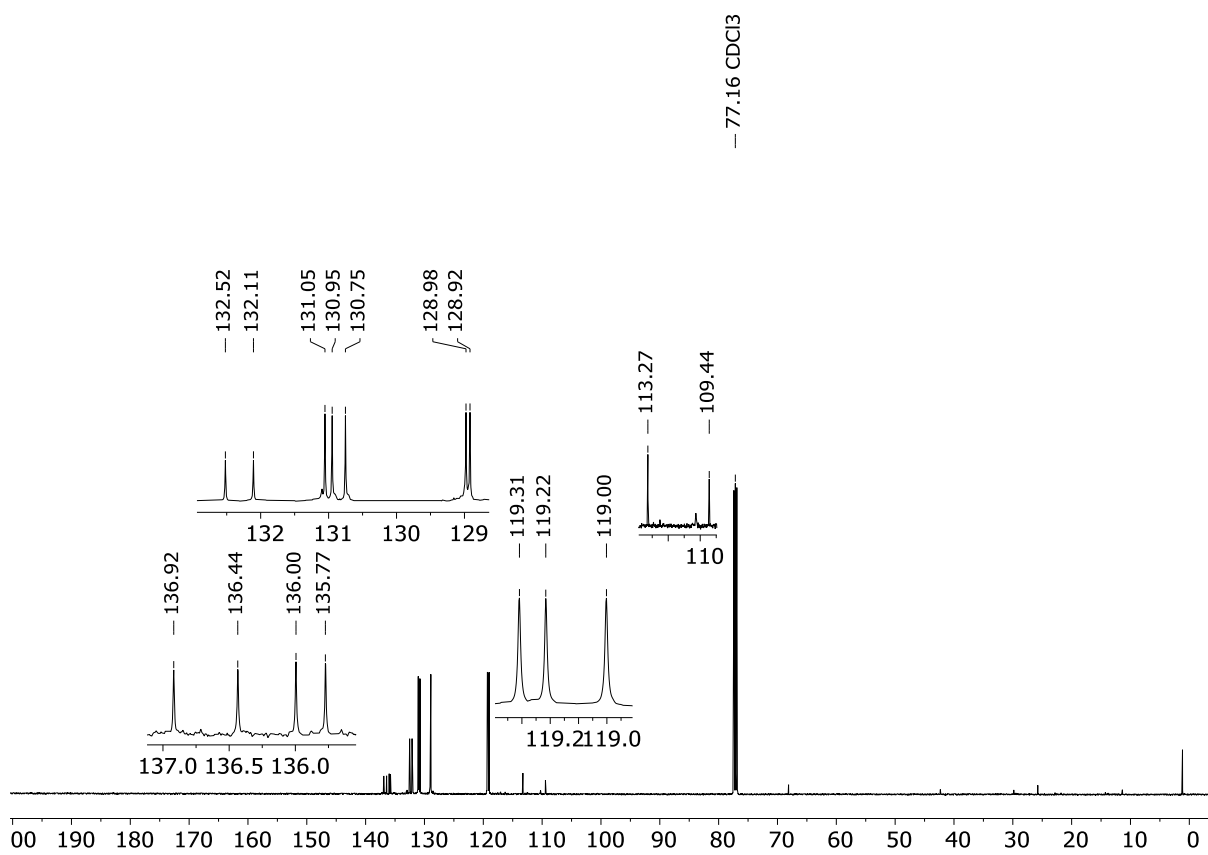

Figure S26: <sup>13</sup>C{<sup>1</sup>H} NMR spectrum of compound **4a** in CDCl<sub>3</sub>.

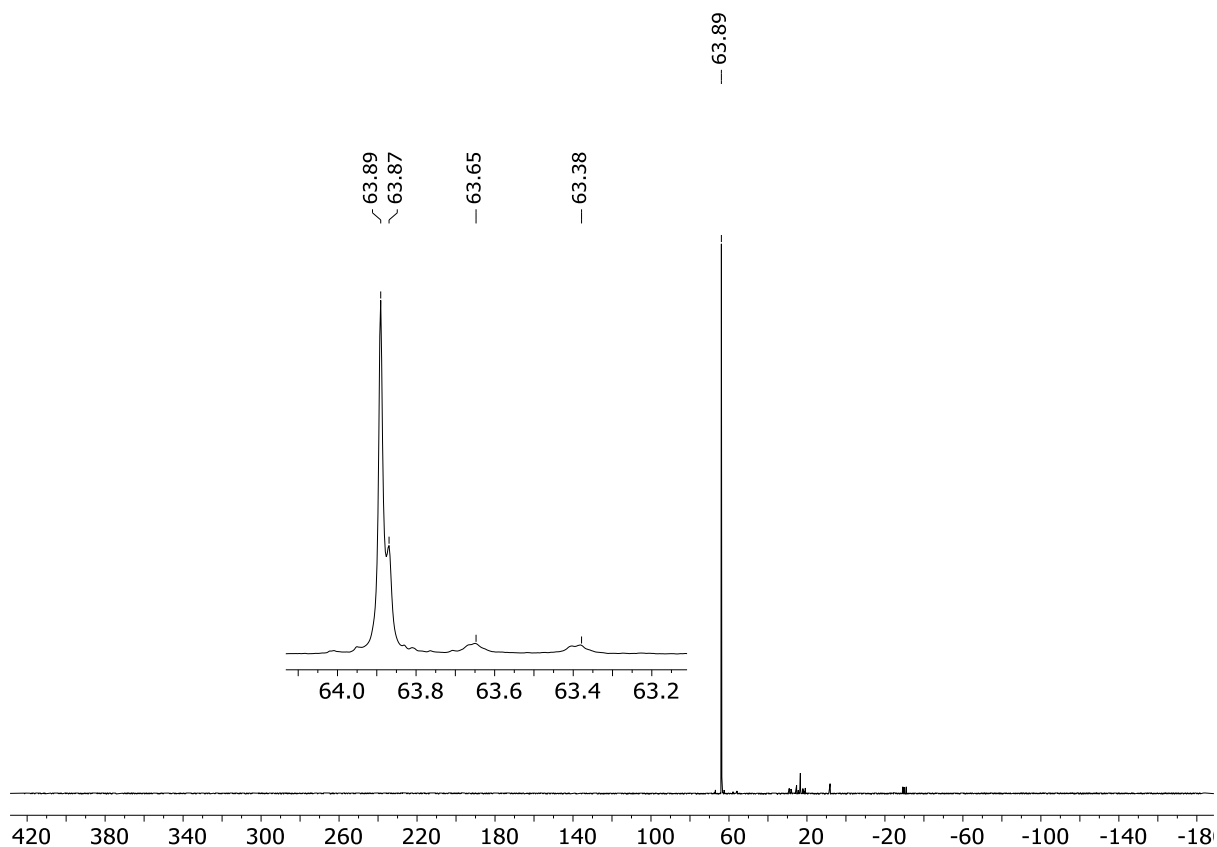

Figure S27:  $^{31}\text{P}\{^1\text{H}\}$  NMR spectrum of compound **4a** in  $\text{CDCl}_3$ .

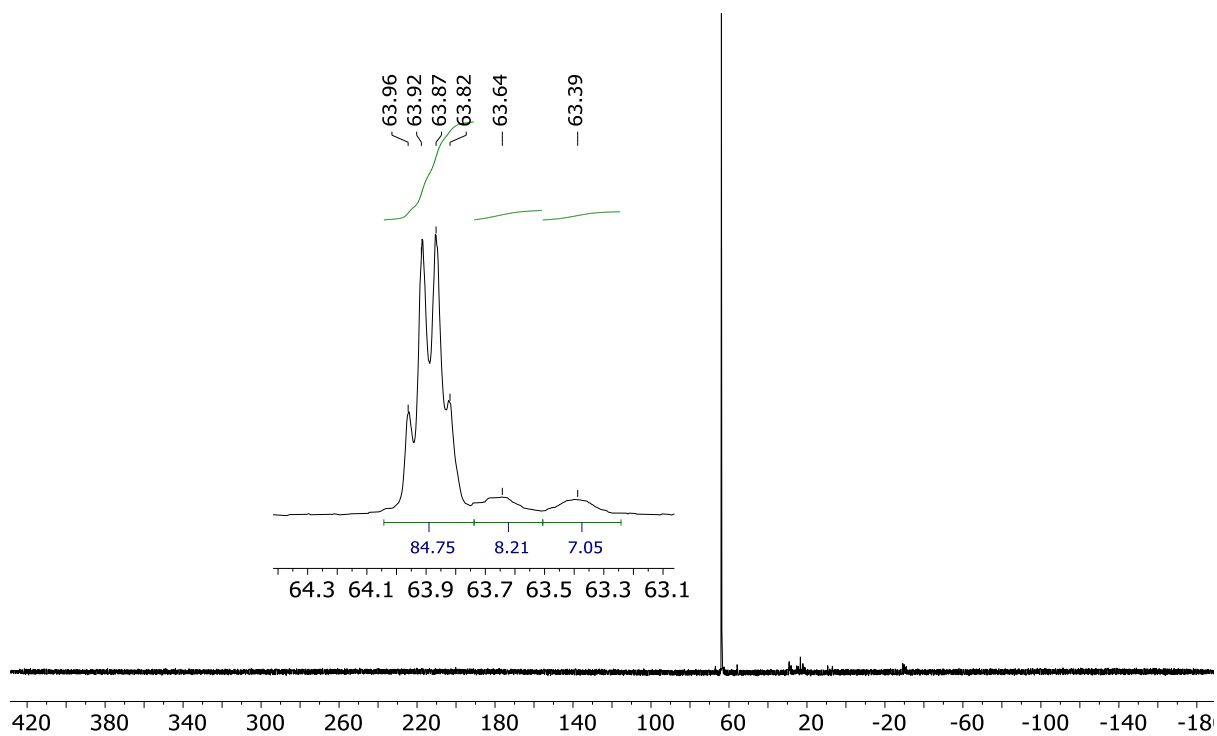

Figure S28:  $^{31}\text{P}$  NMR spectrum of compound **4a** in  $\text{CDCl}_3$ .



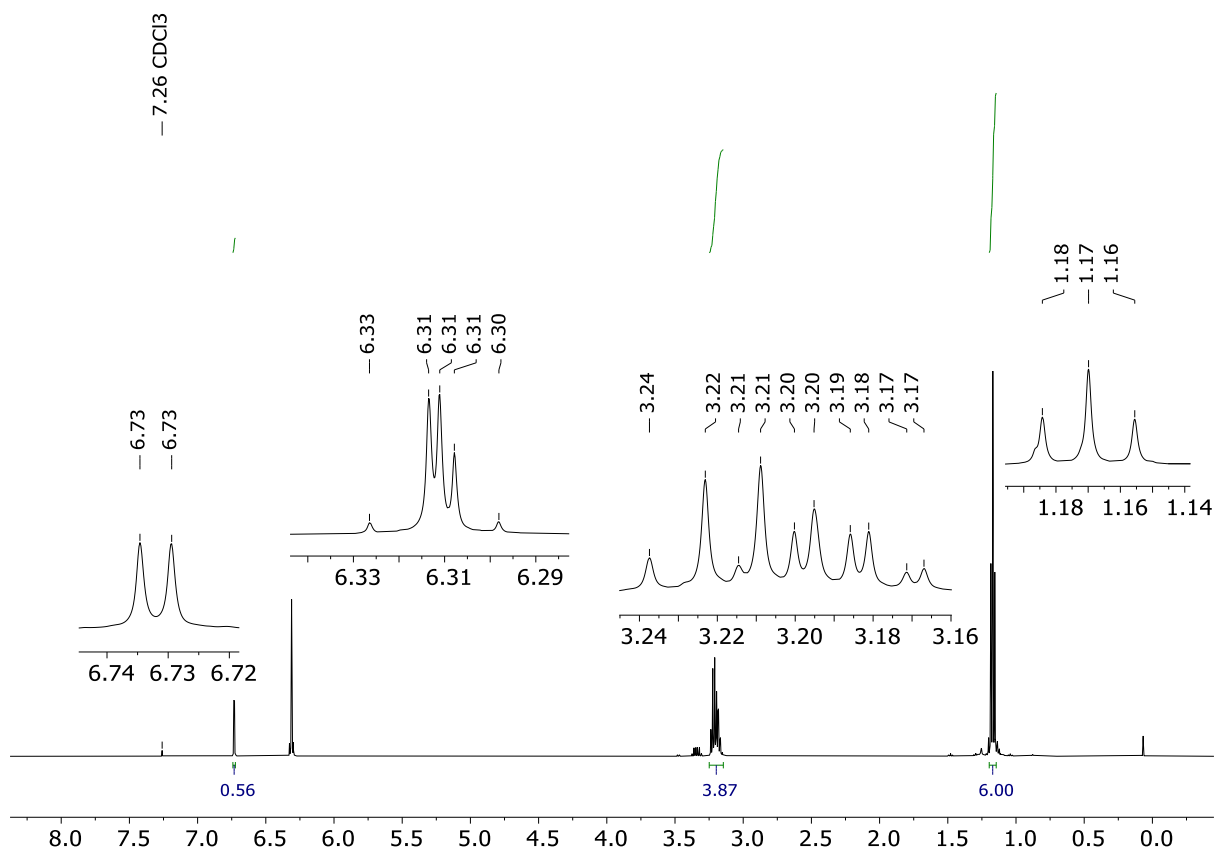

**Figure S29:** <sup>1</sup>H NMR spectrum of compound **4b** in CDCl<sub>3</sub>.

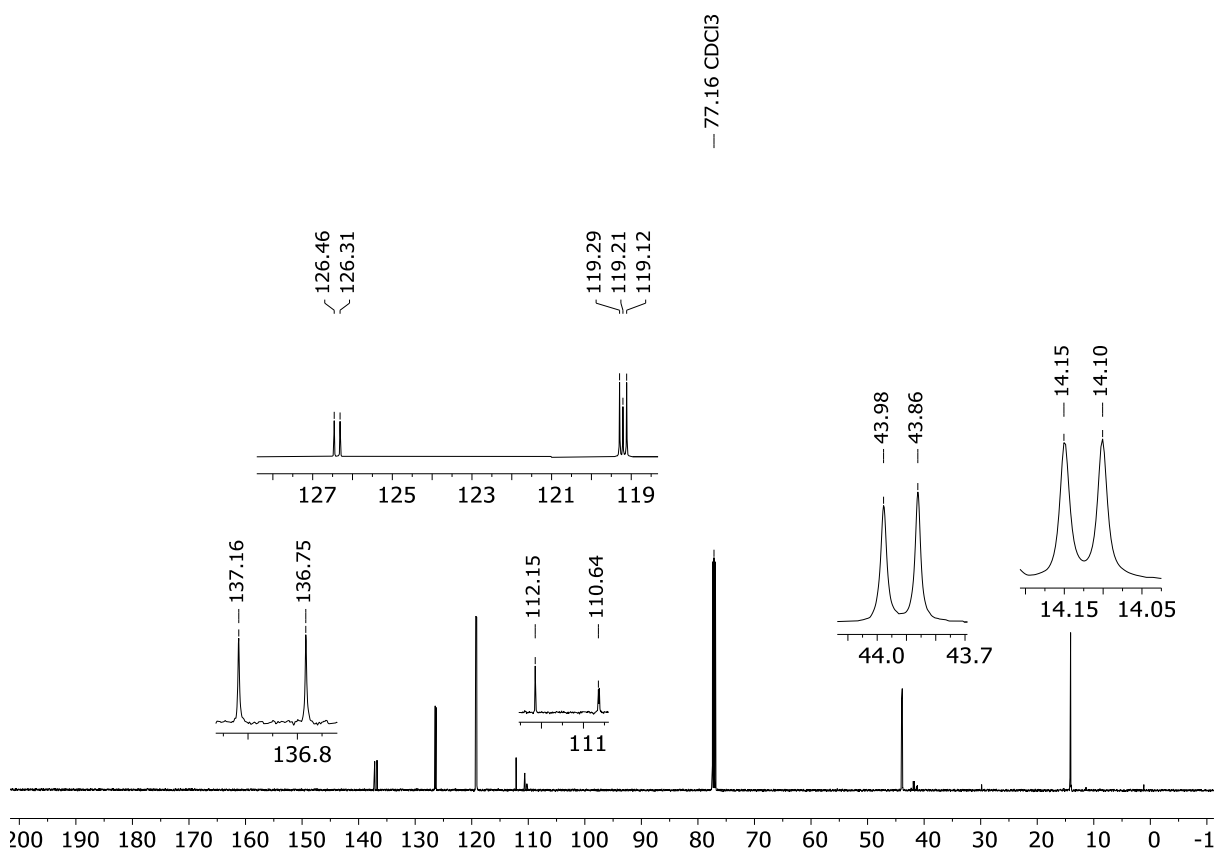

**Figure S30:** <sup>13</sup>C{<sup>1</sup>H} NMR spectrum of compound **4b** in CDCl<sub>3</sub>.

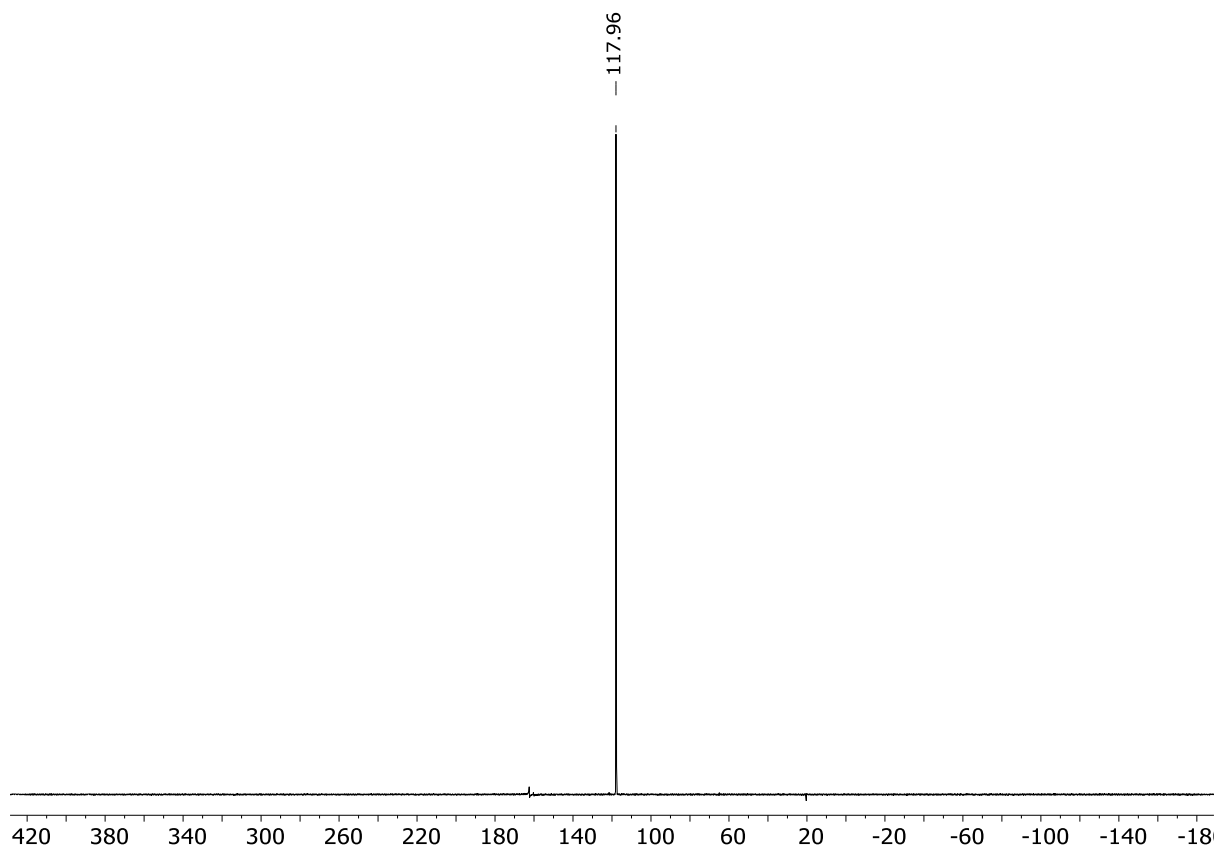

**Figure S31:**  $^{31}\text{P}\{^1\text{H}\}$  NMR spectrum of compound **4b** in  $\text{CDCl}_3$ .

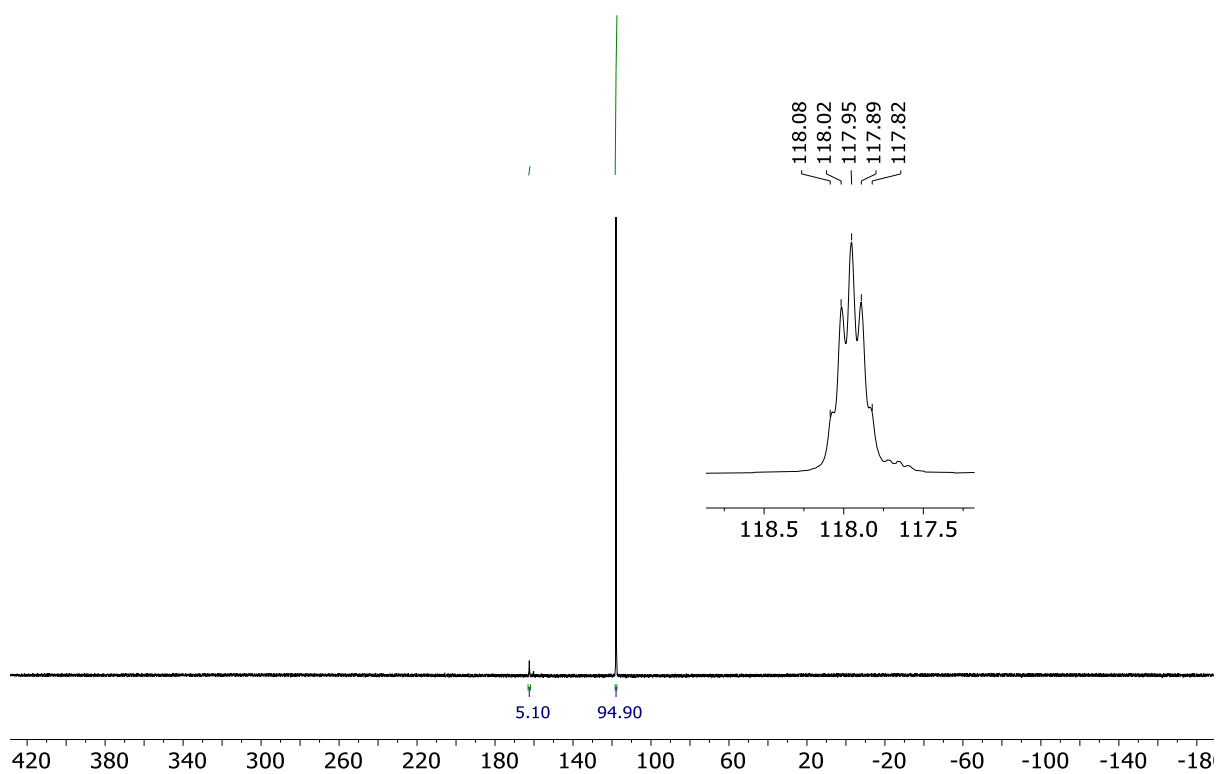

**Figure S32:**  $^{31}\text{P}$  NMR spectrum of compound **4b** in  $\text{CDCl}_3$ .

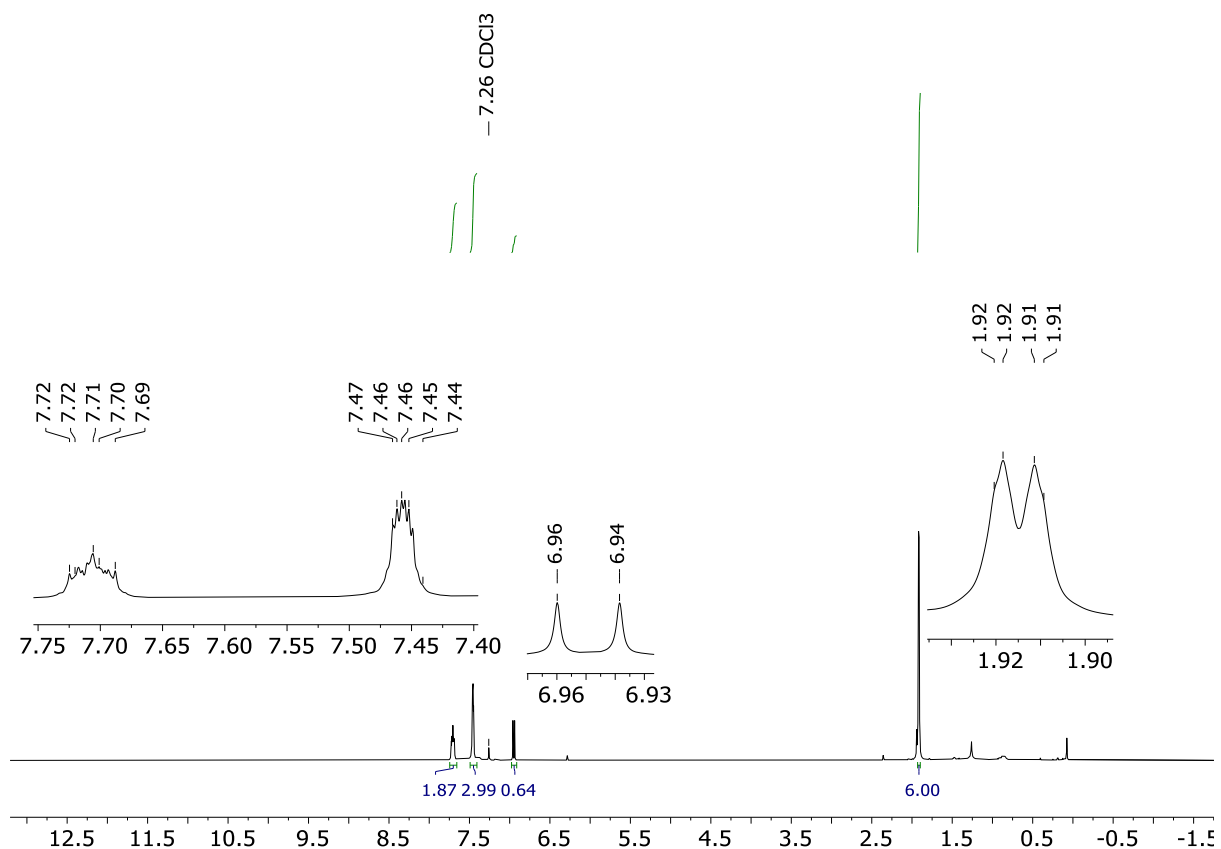

Figure S33:  $^1\text{H}$  NMR spectrum of compound **4c** in  $\text{CDCl}_3$ .

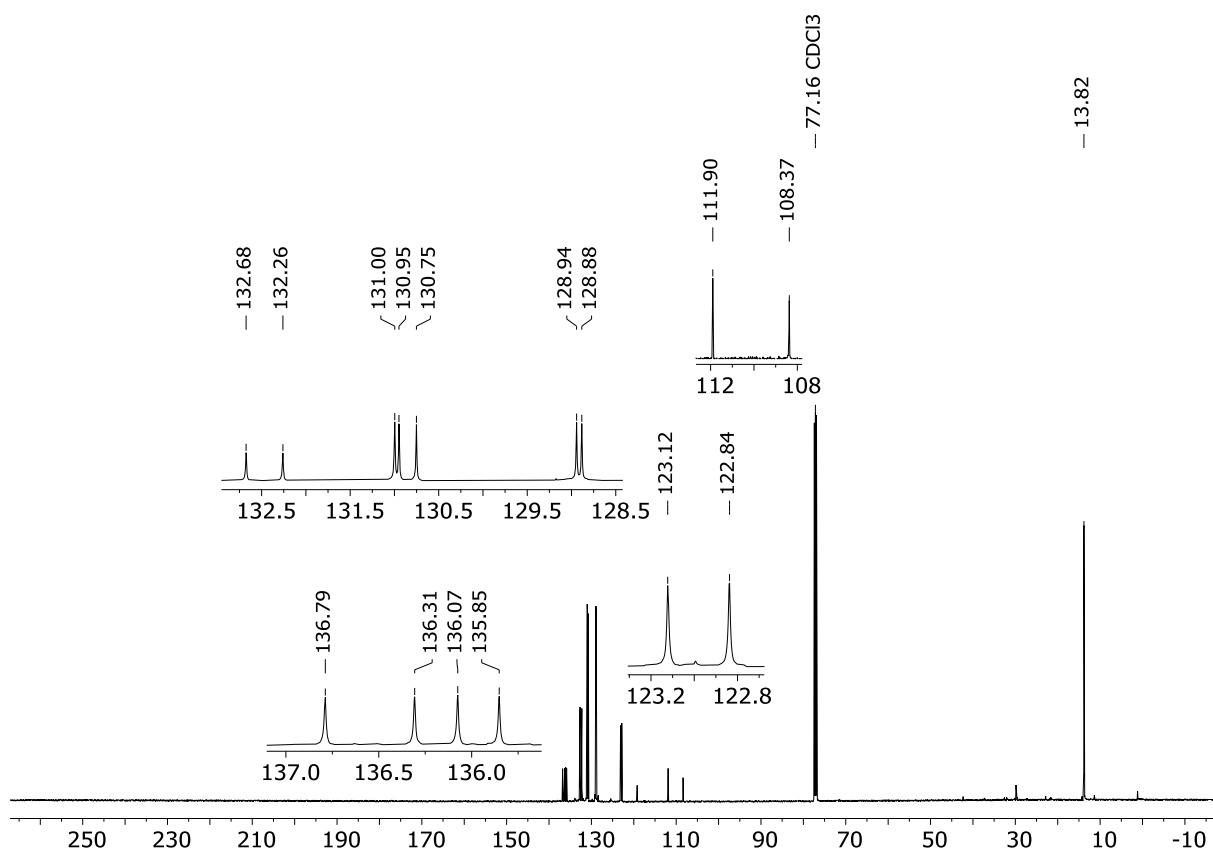

Figure S34:  $^{13}\text{C}\{^1\text{H}\}$  NMR spectrum of compound **4c** in  $\text{CDCl}_3$ .

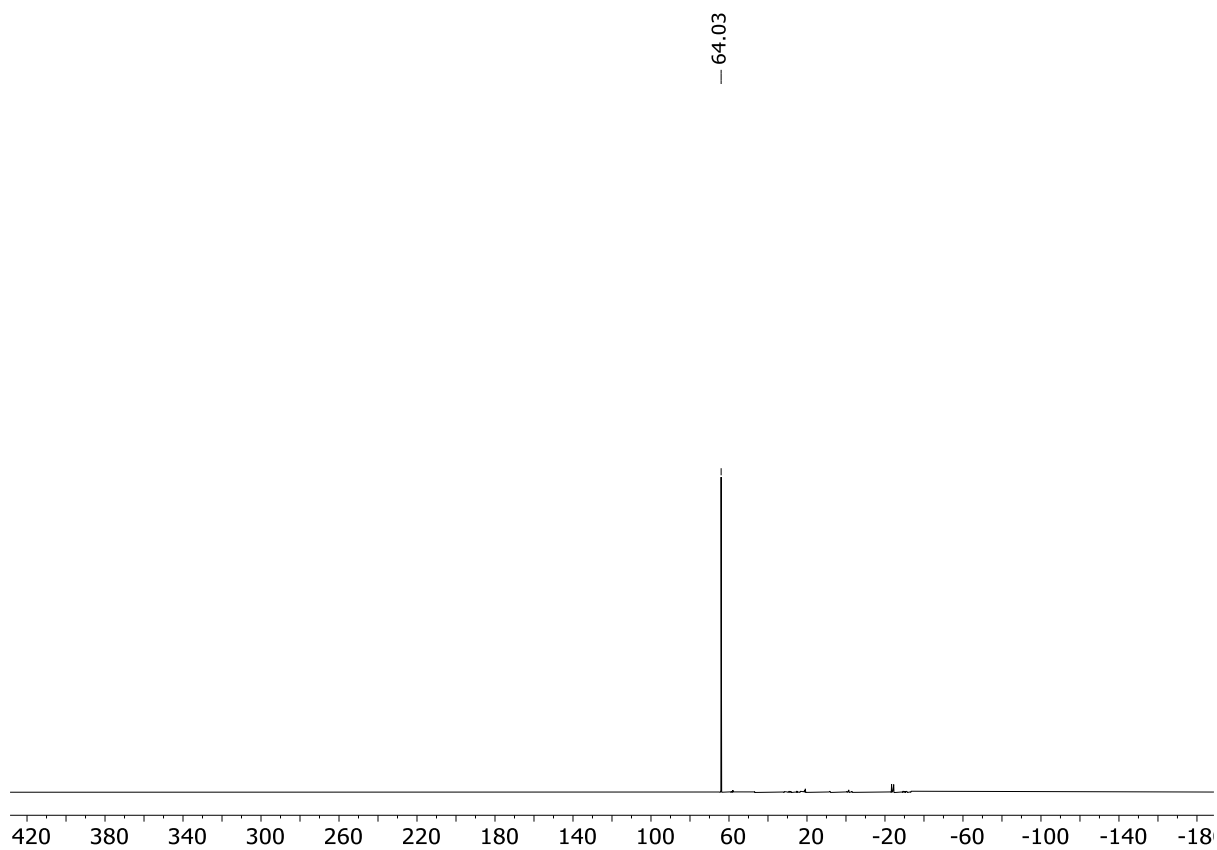

**Figure S35:**  $^{31}\text{P}\{^1\text{H}\}$  NMR spectrum of compound **4c** in  $\text{CDCl}_3$ .

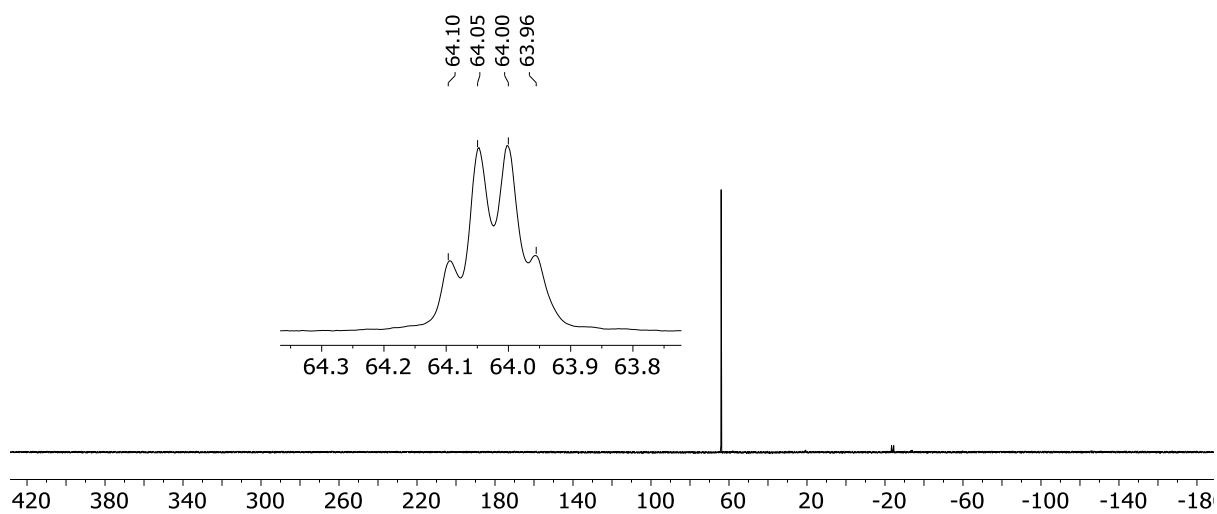

**Figure S36:**  $^{31}\text{P}$  NMR spectrum of compound **4c** in  $\text{CDCl}_3$ .

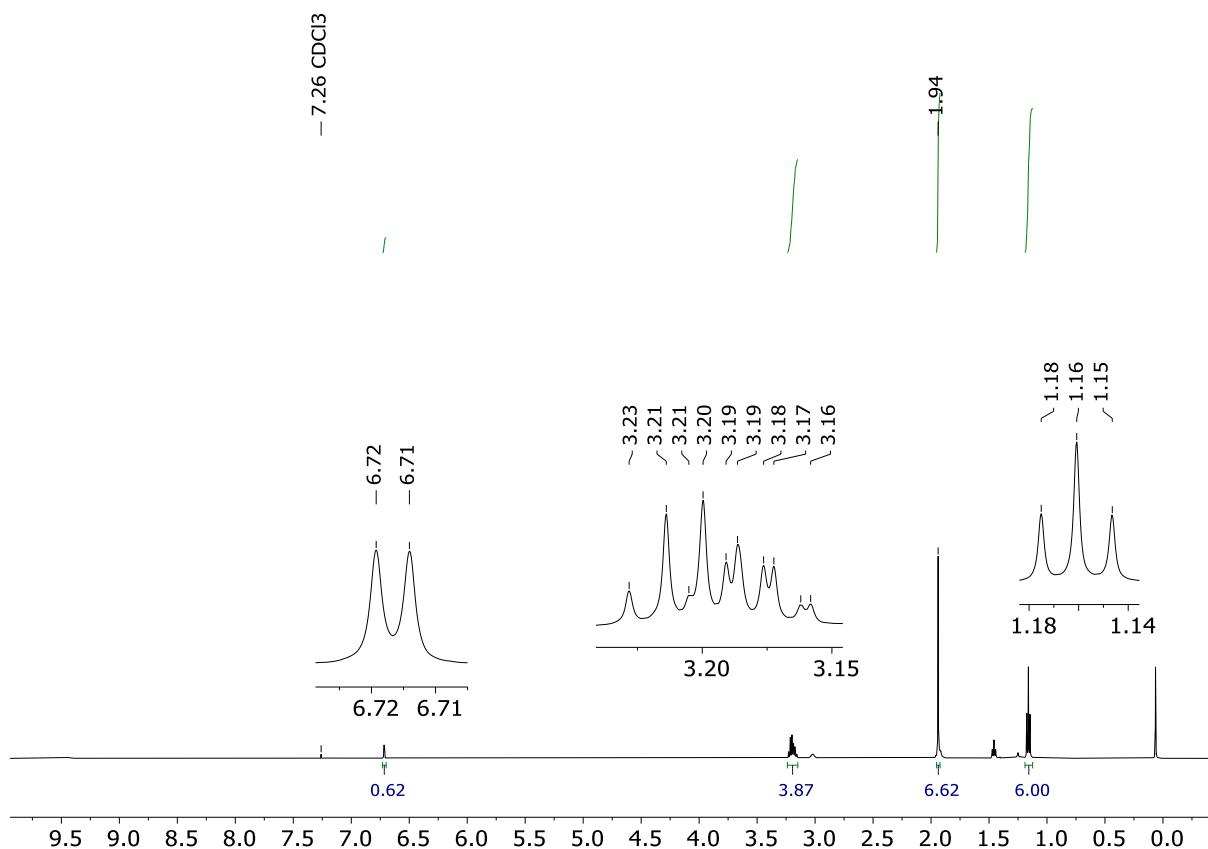

Figure S37: <sup>1</sup>H NMR spectrum of compound **4d** in CDCl<sub>3</sub>.

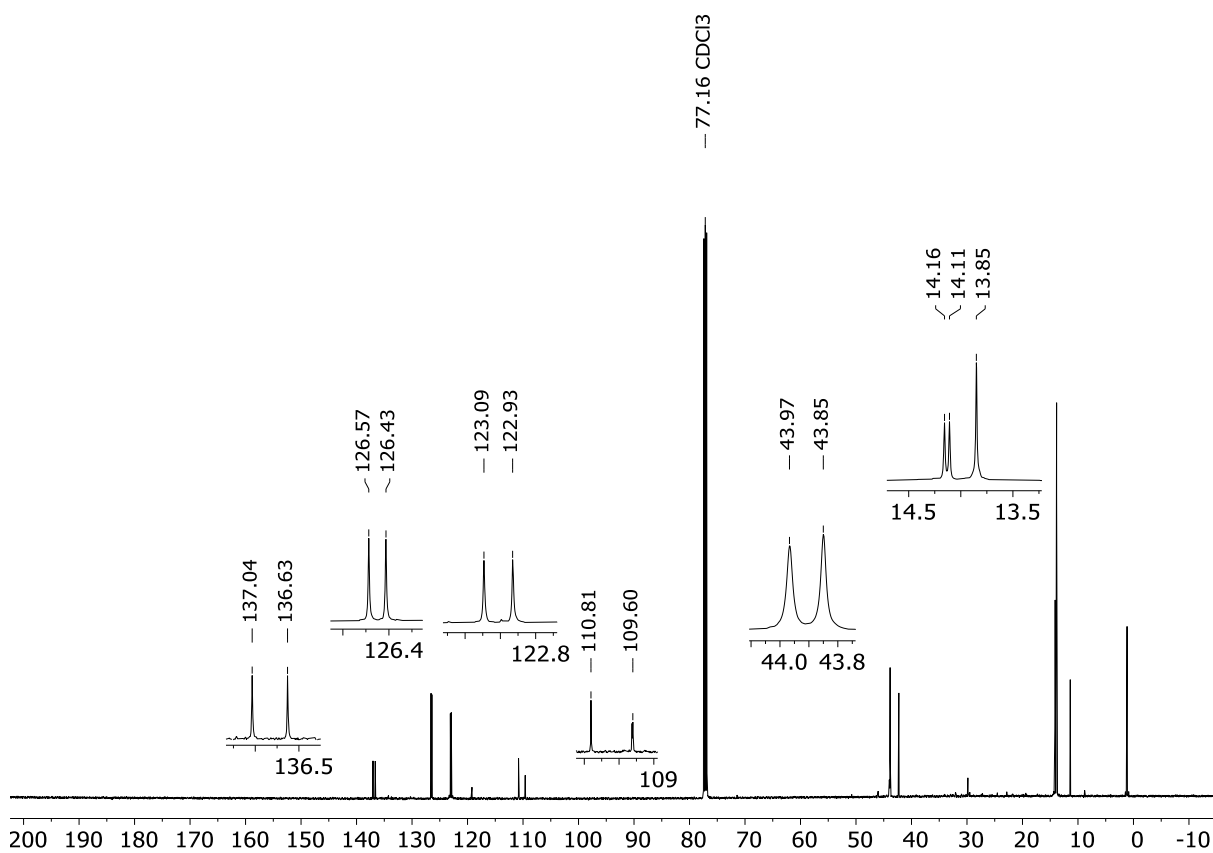

Figure S38: <sup>13</sup>C{<sup>1</sup>H} NMR spectrum of compound **4d** in CDCl<sub>3</sub>.

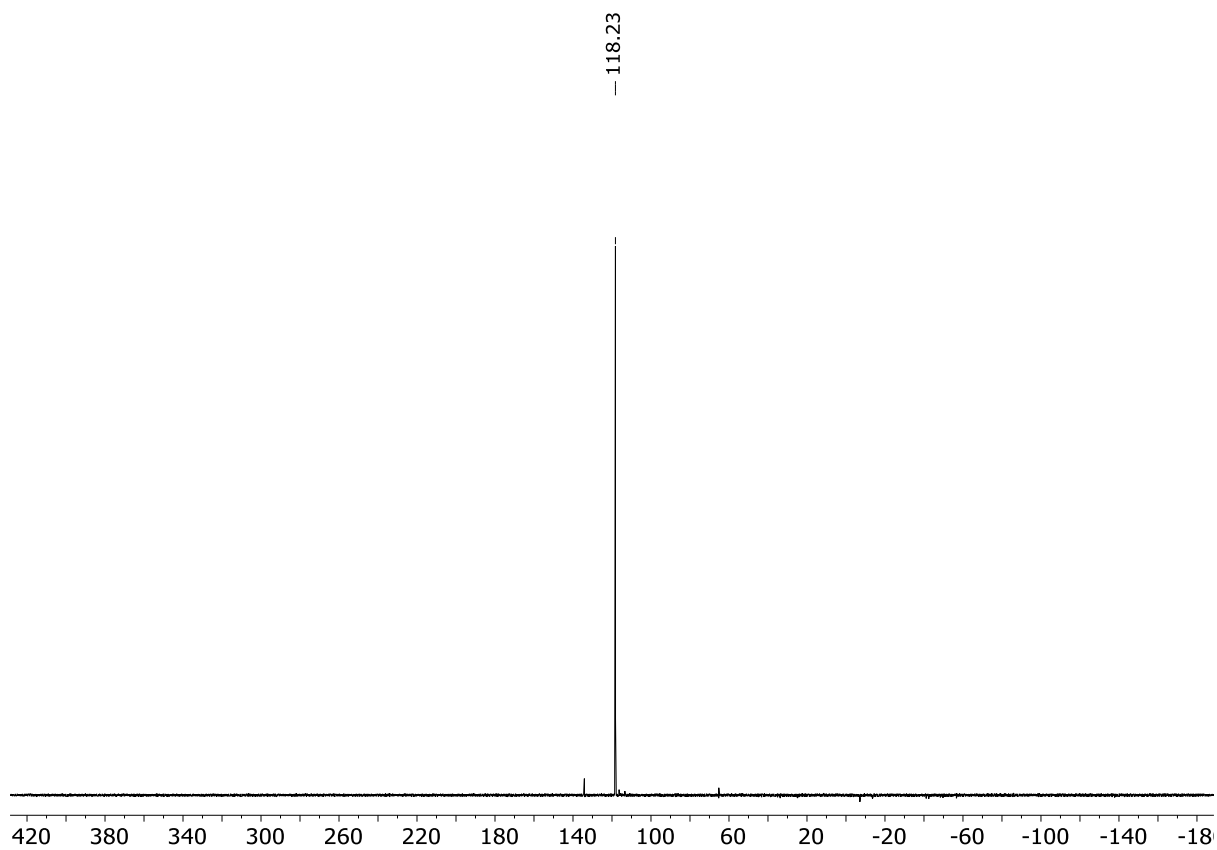

Figure S39:  $^{31}\text{P}\{^1\text{H}\}$  NMR spectrum of compound **4d** in  $\text{CDCl}_3$ .

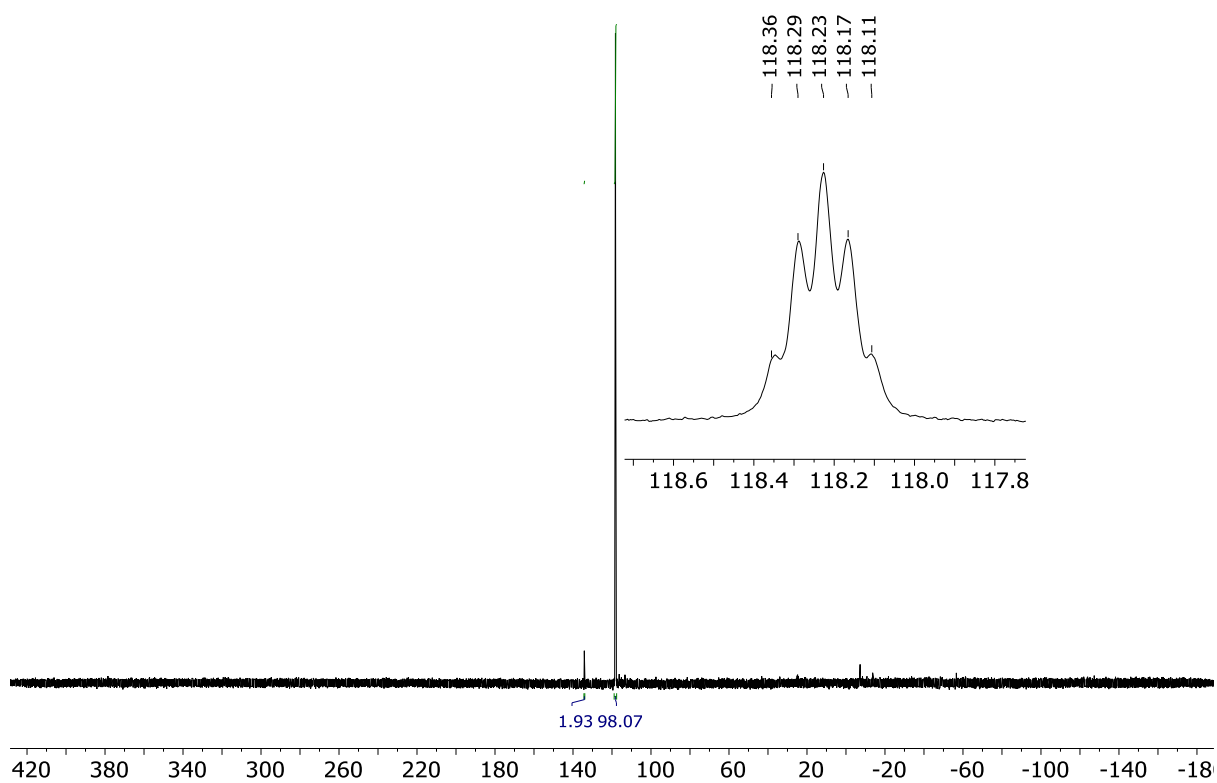

Figure S40:  $^{31}\text{P}$  NMR spectrum of compound **4d** in  $\text{CDCl}_3$ .

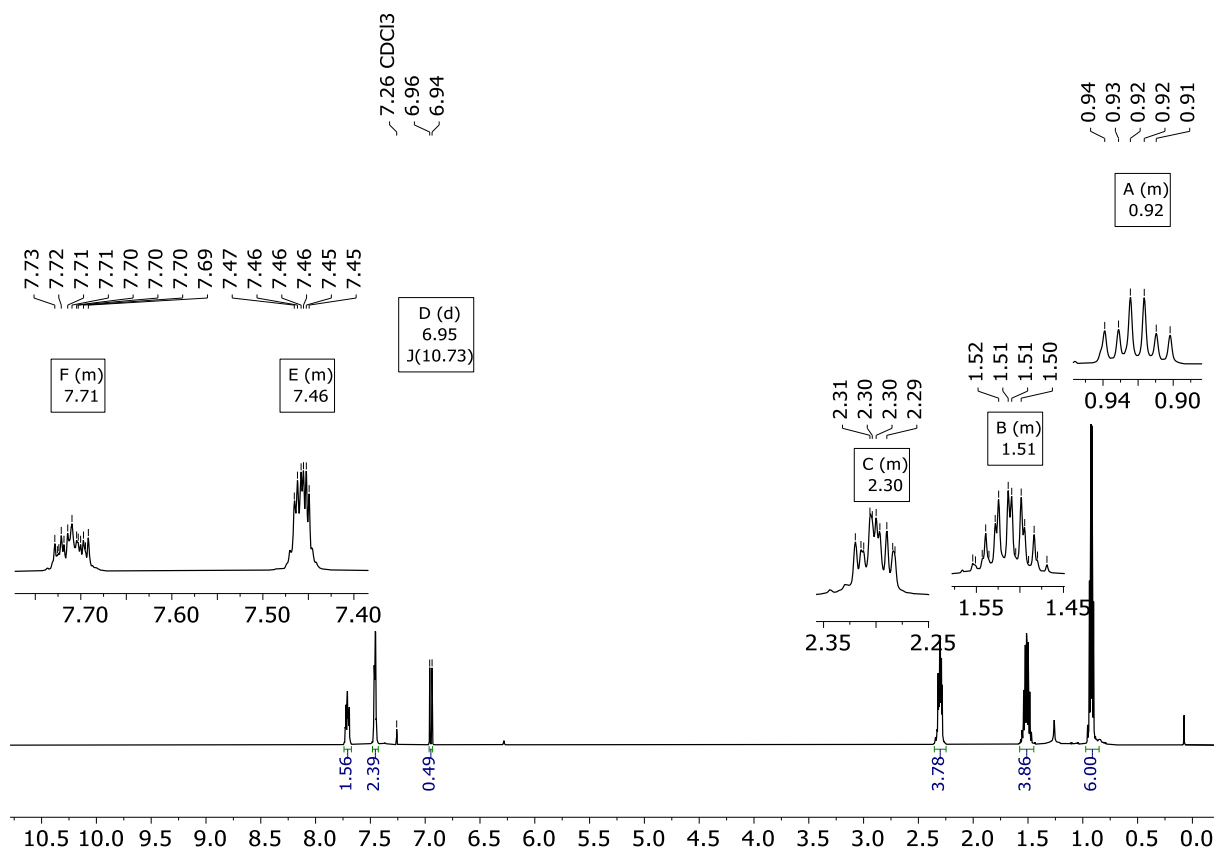

**Figure S41:**  $^1\text{H}$  NMR spectrum of compound **4e** in  $\text{CDCl}_3$ .

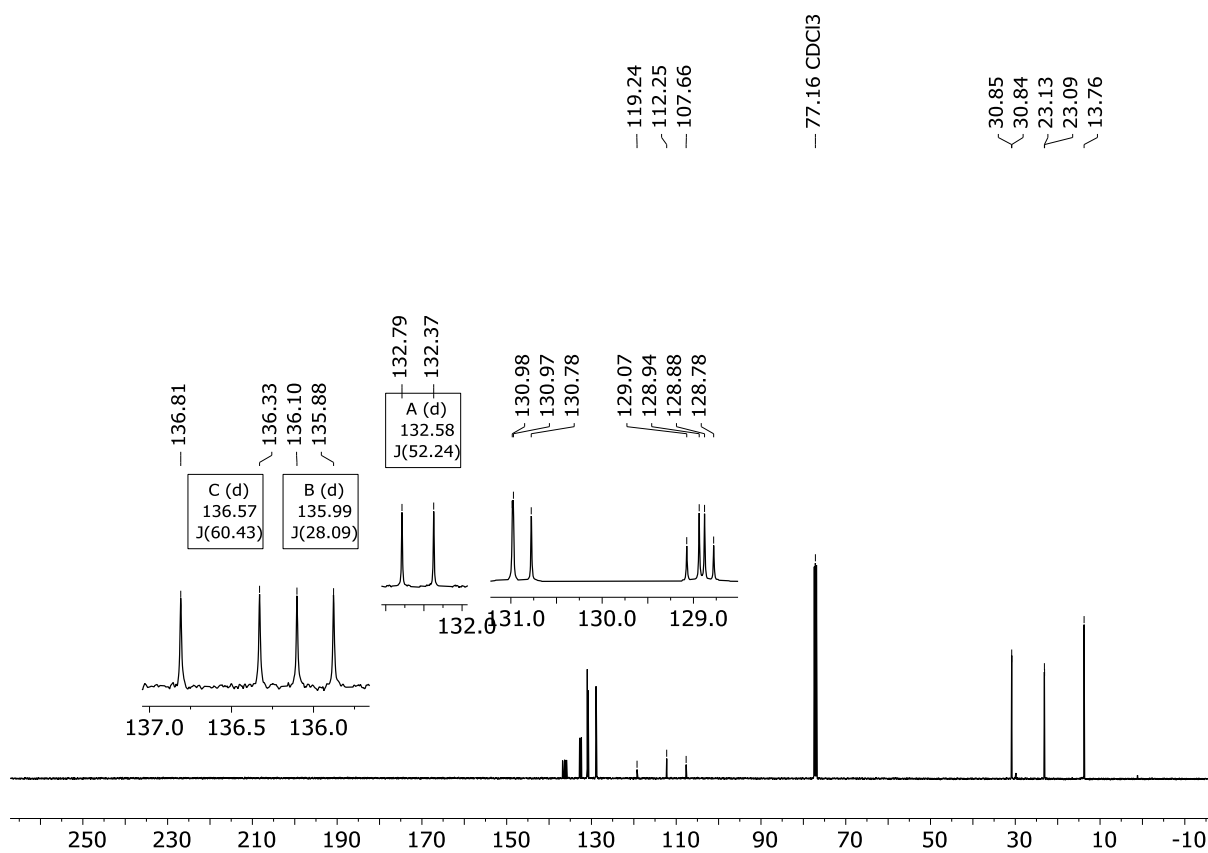

**Figure S42:**  $^{13}\text{C}\{^1\text{H}\}$  NMR spectrum of compound **4e** in  $\text{CDCl}_3$ .

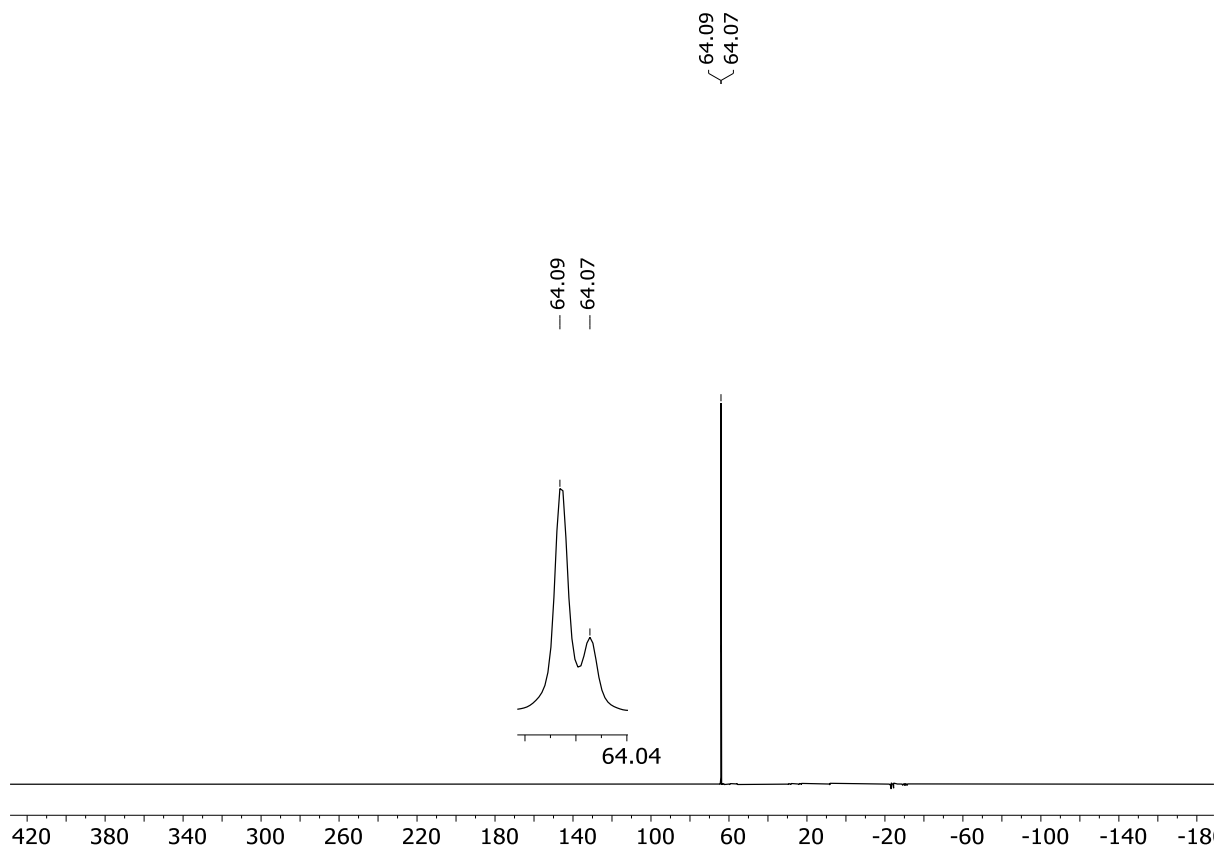

**Figure S43:**  $^{31}\text{P}\{^1\text{H}\}$  NMR spectrum of compound **4e** in  $\text{CDCl}_3$ .

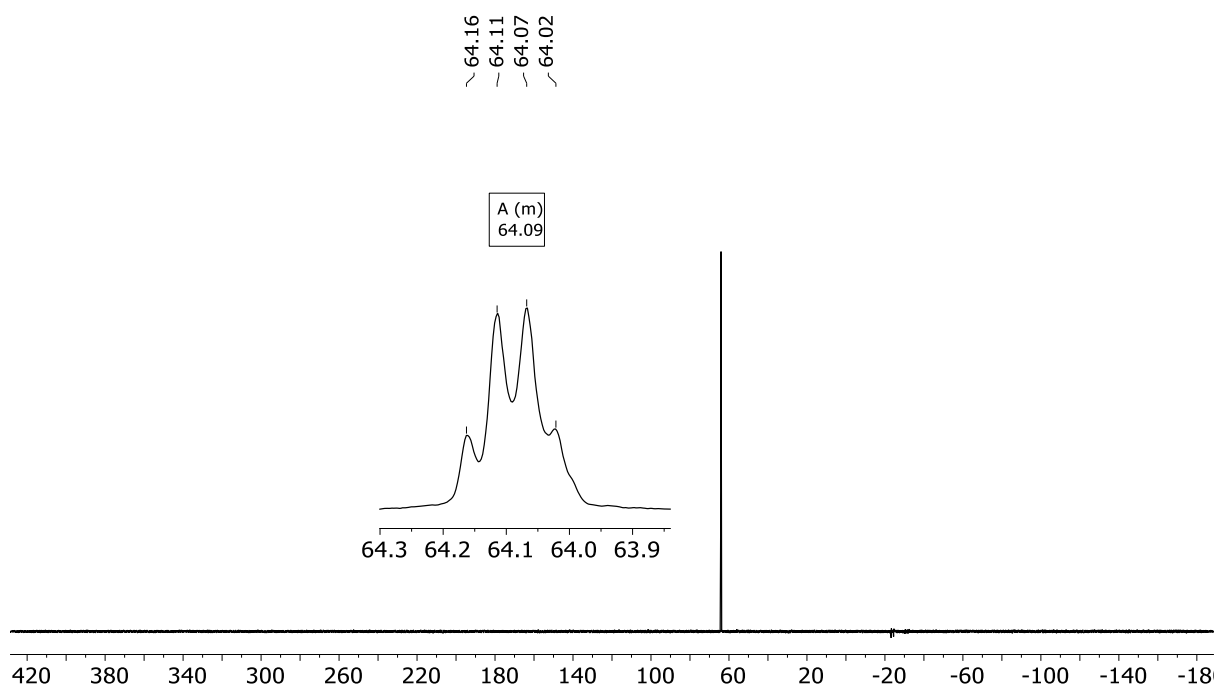

**Figure S44:**  $^{31}\text{P}$  NMR spectrum of compound **4e** in  $\text{CDCl}_3$ .



- 7.26 CDCl<sub>3</sub>

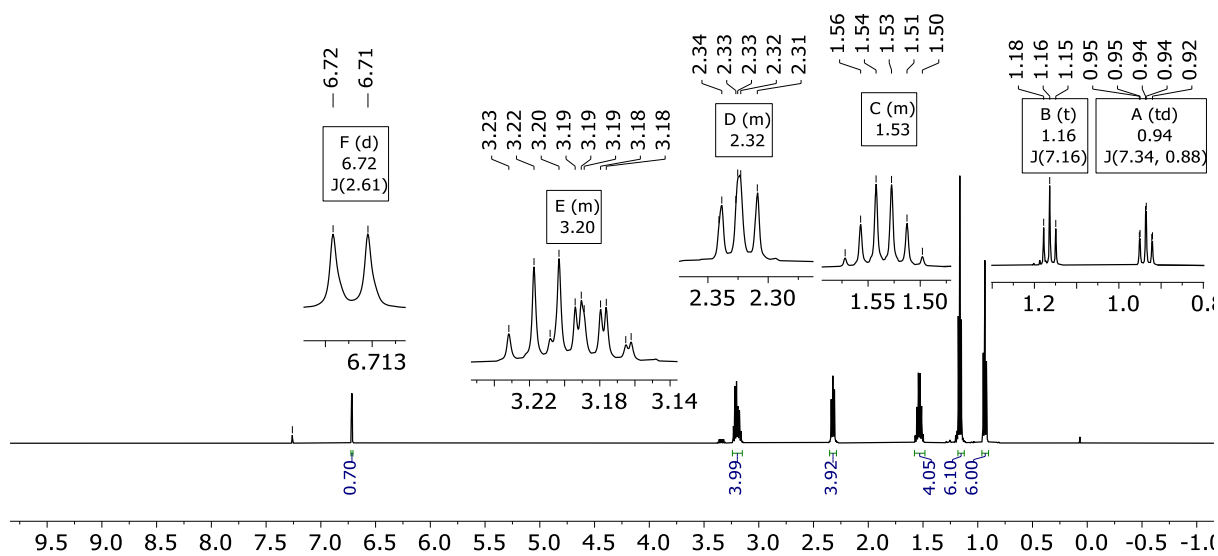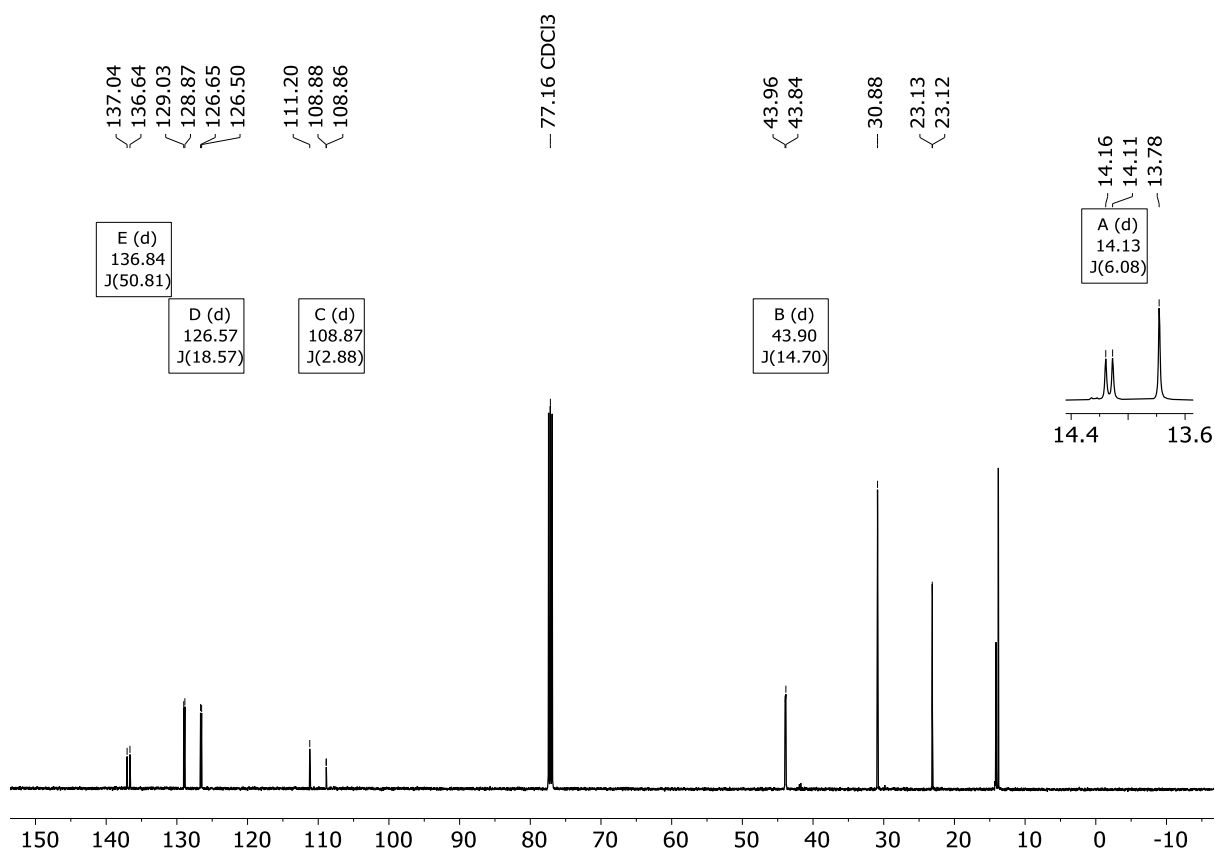

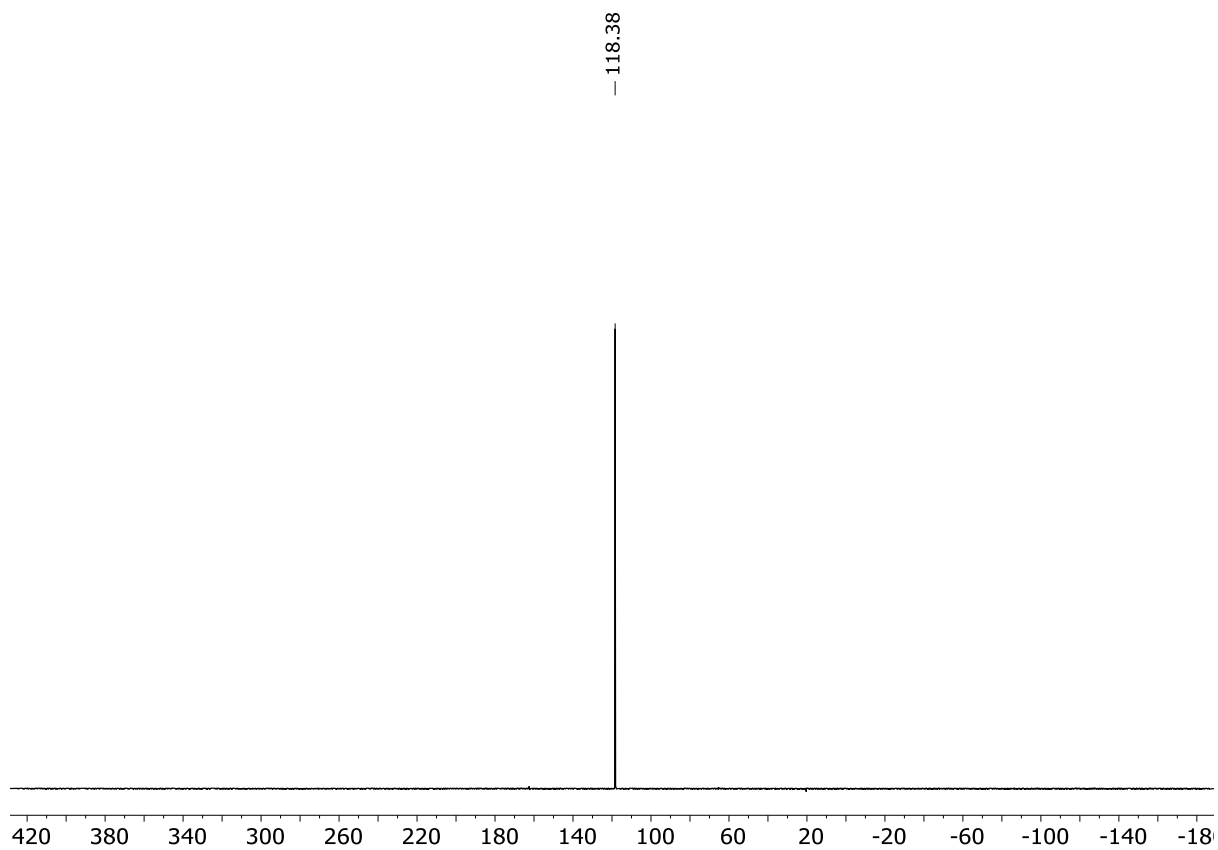

Figure S47:  $^{31}\text{P}\{^1\text{H}\}$  NMR spectrum of compound **4f** in  $\text{CDCl}_3$ .

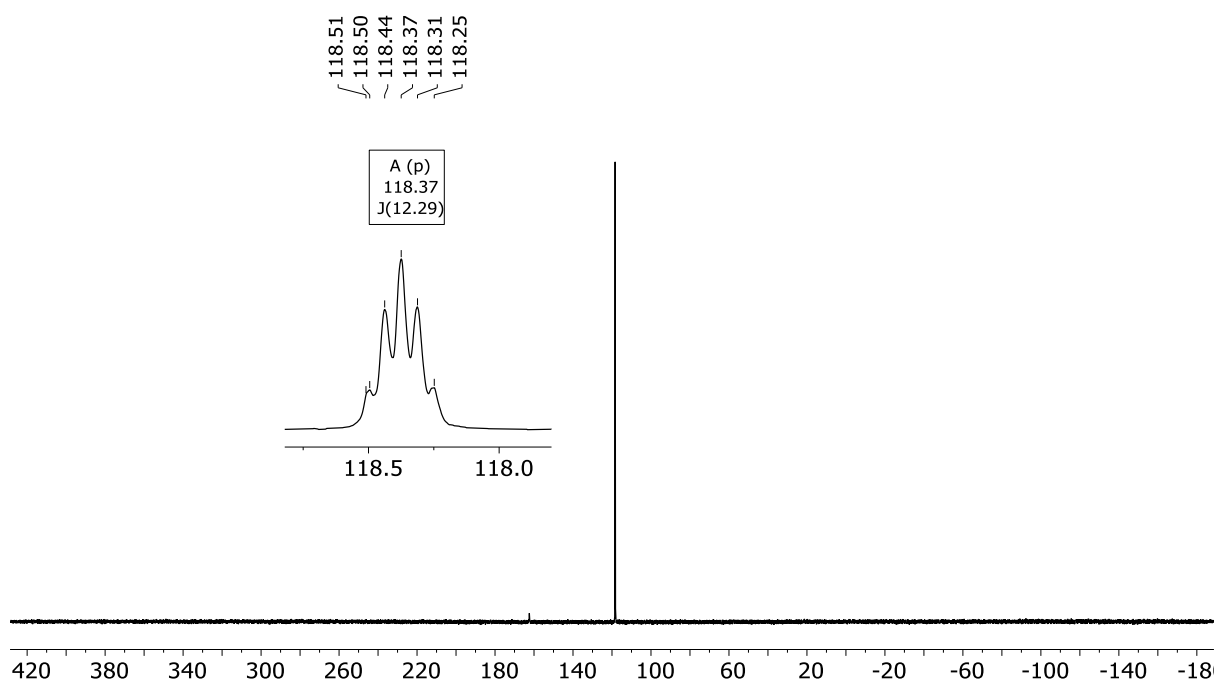

Figure S48:  $^{31}\text{P}$  NMR spectrum of compound **4f** in  $\text{CDCl}_3$ .

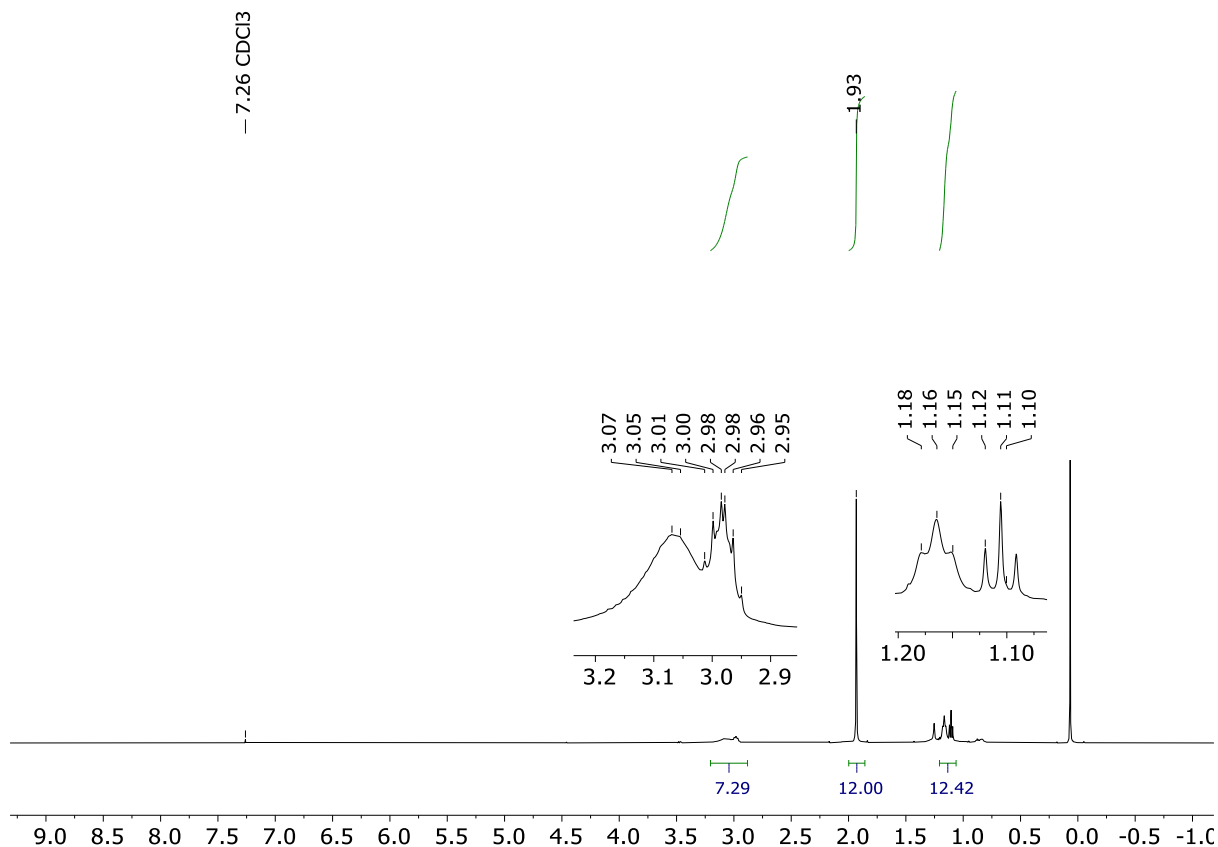

**Figure S49:** <sup>1</sup>H NMR spectrum of compound **5d** in CDCl<sub>3</sub>.

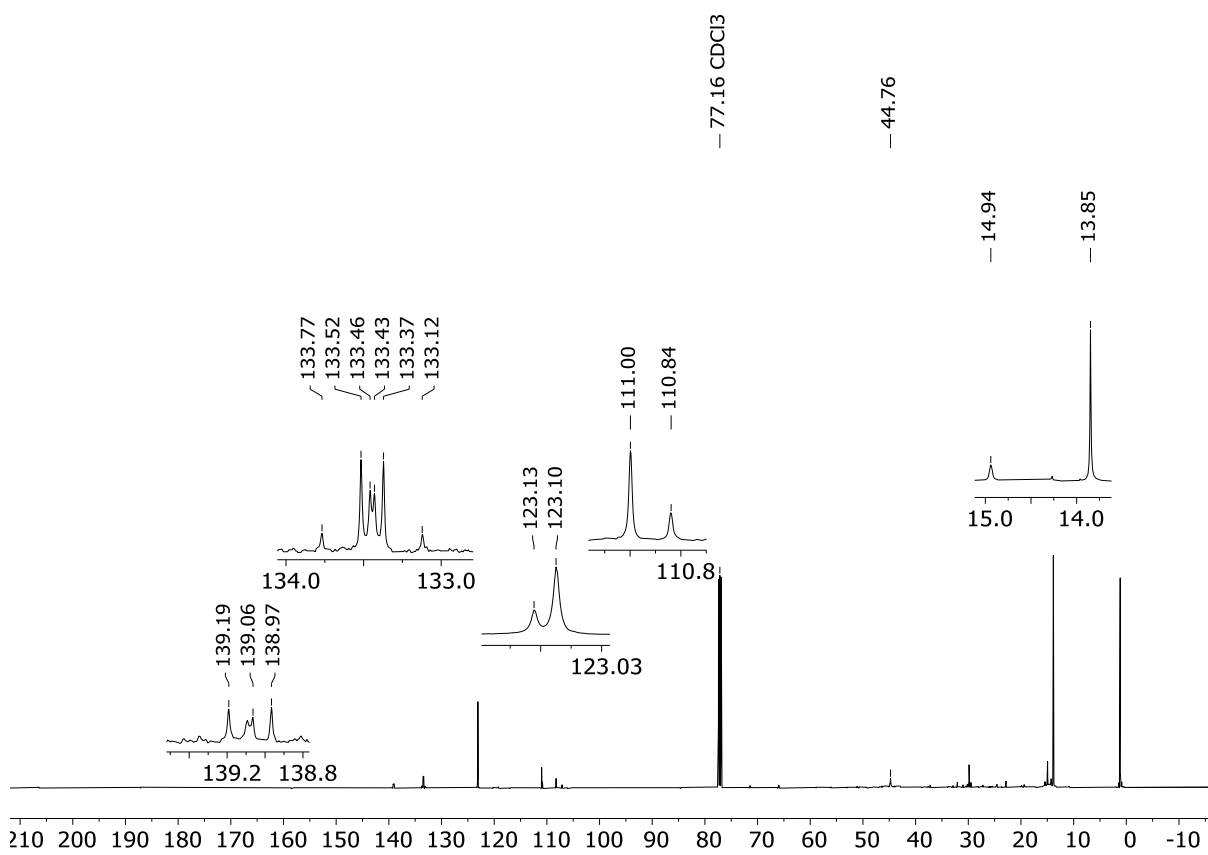

**Figure S50:** <sup>13</sup>C{<sup>1</sup>H} NMR spectrum of compound **5d** in CDCl<sub>3</sub>.

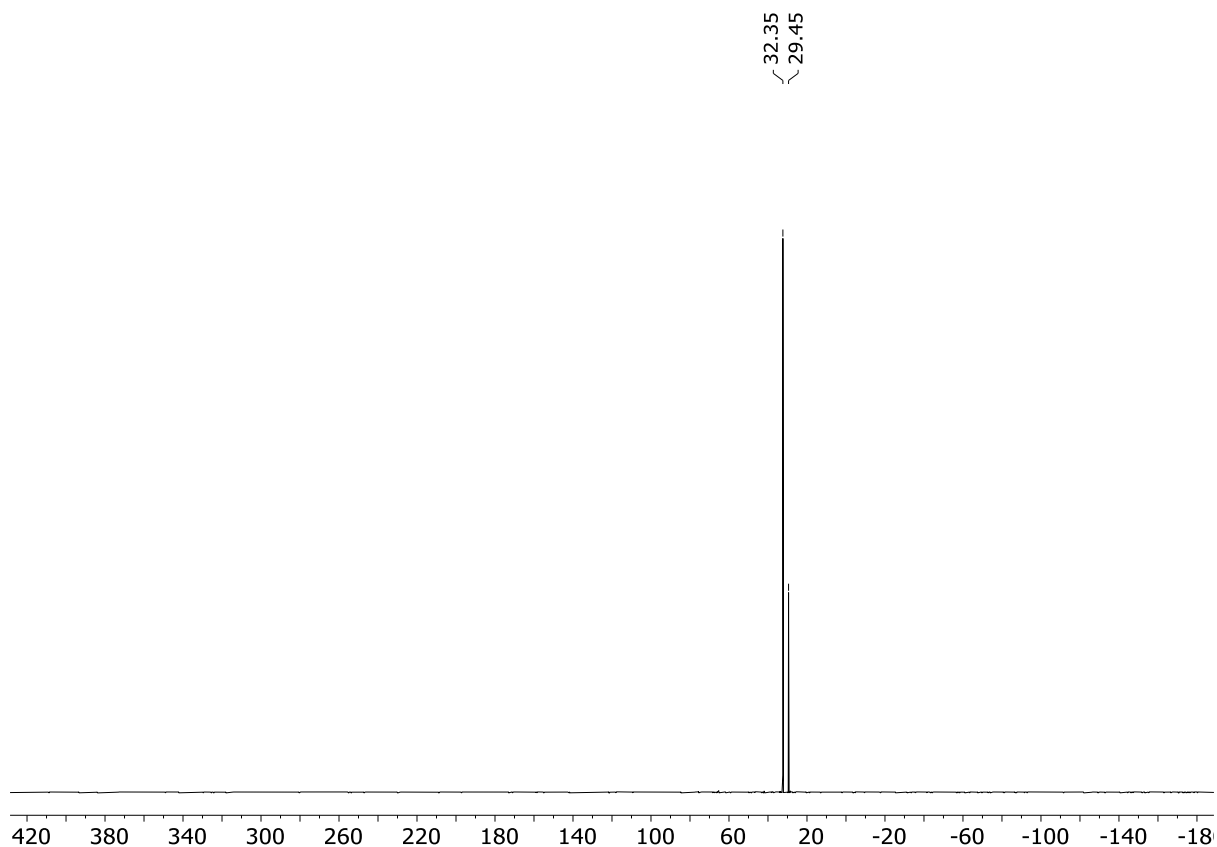

Figure S51:  $^{31}\text{P}\{^1\text{H}\}$  NMR spectrum of compound **5d** in  $\text{CDCl}_3$ .

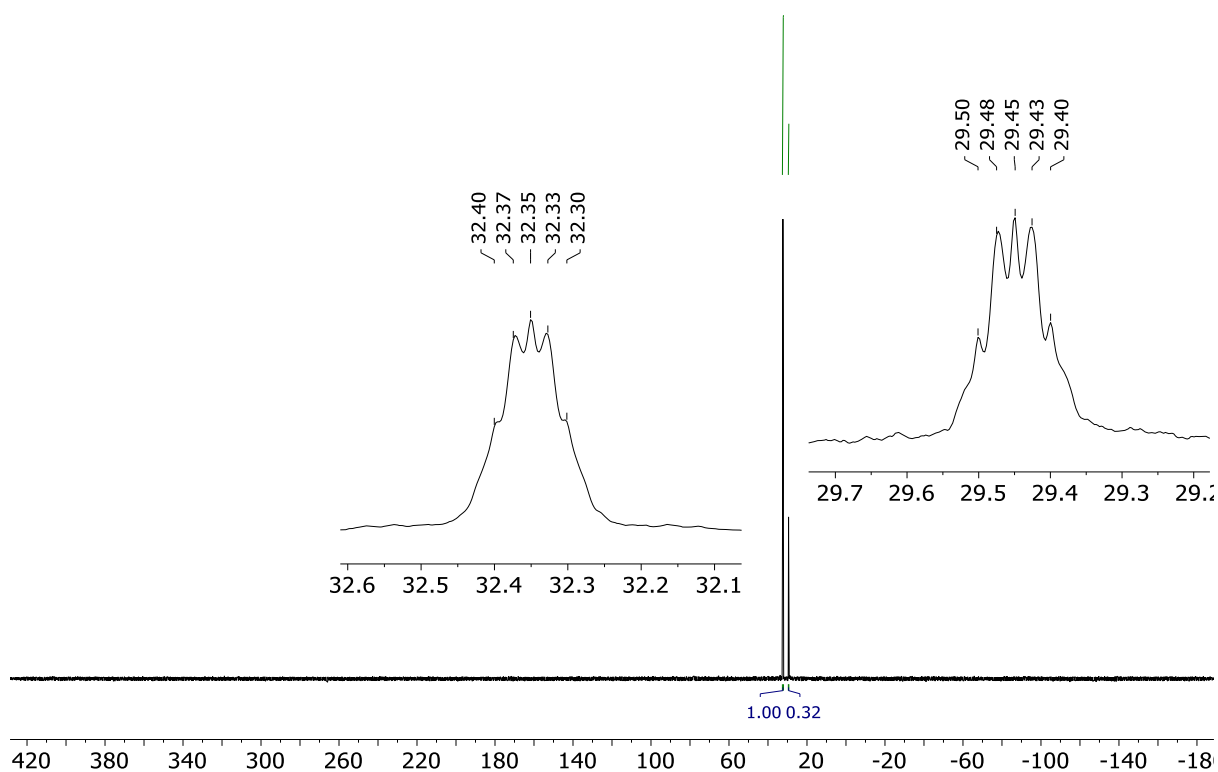

Figure S52:  $^{31}\text{P}$  NMR spectrum of compound **5d** in  $\text{CDCl}_3$ .

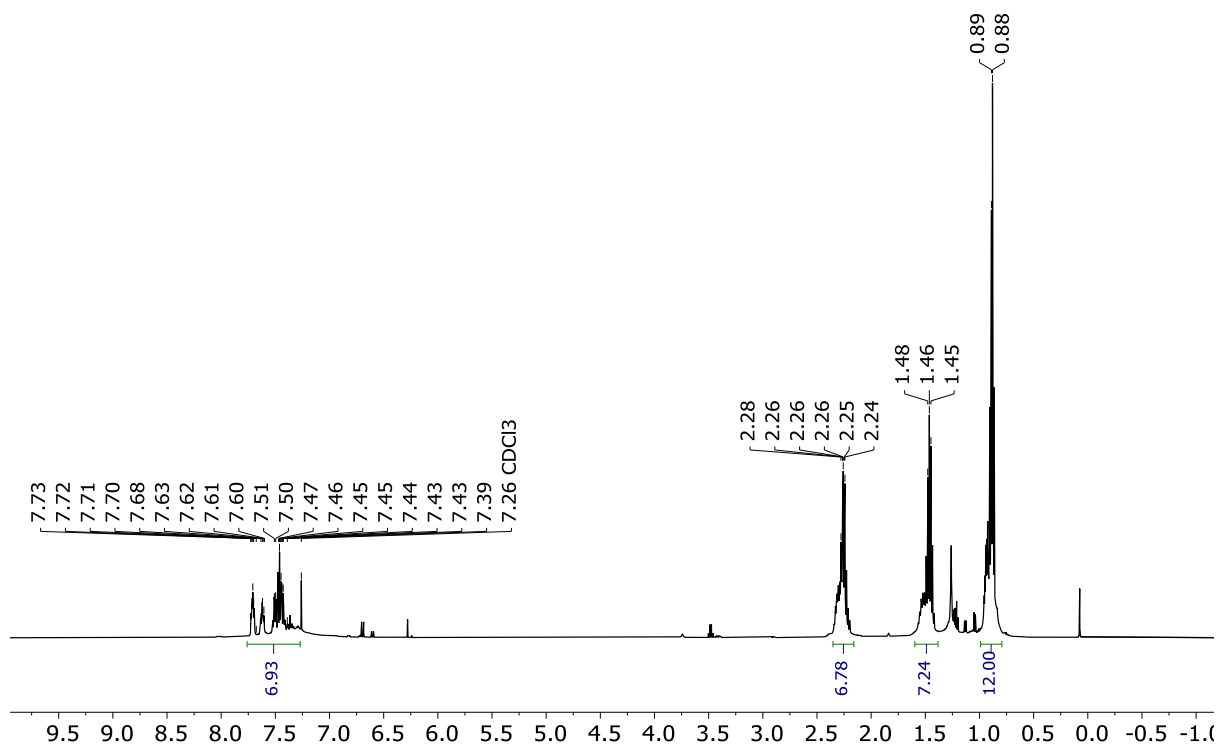

Figure S53: <sup>1</sup>H NMR spectrum of compound **5e** in CDCl<sub>3</sub>.

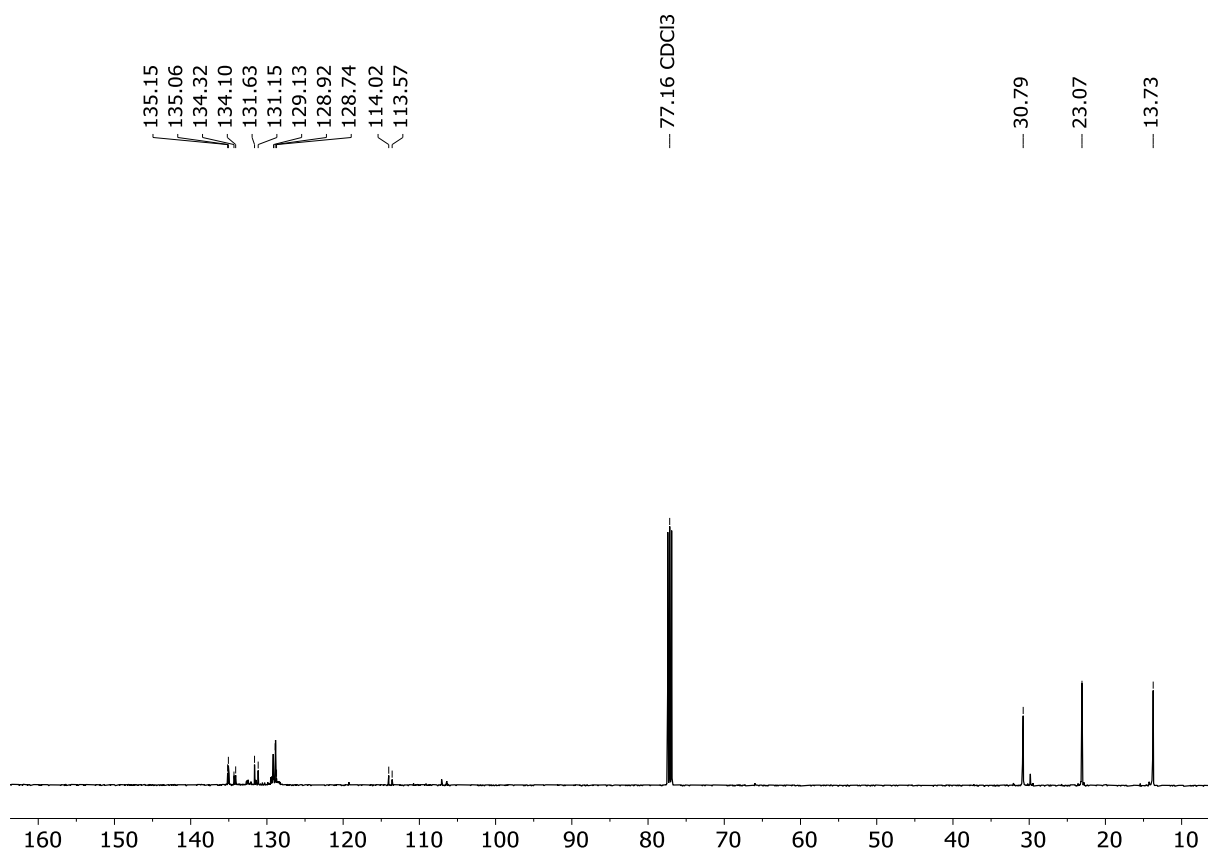

Figure S54: <sup>13</sup>C{<sup>1</sup>H} NMR spectrum of compound **5e** in CDCl<sub>3</sub>.

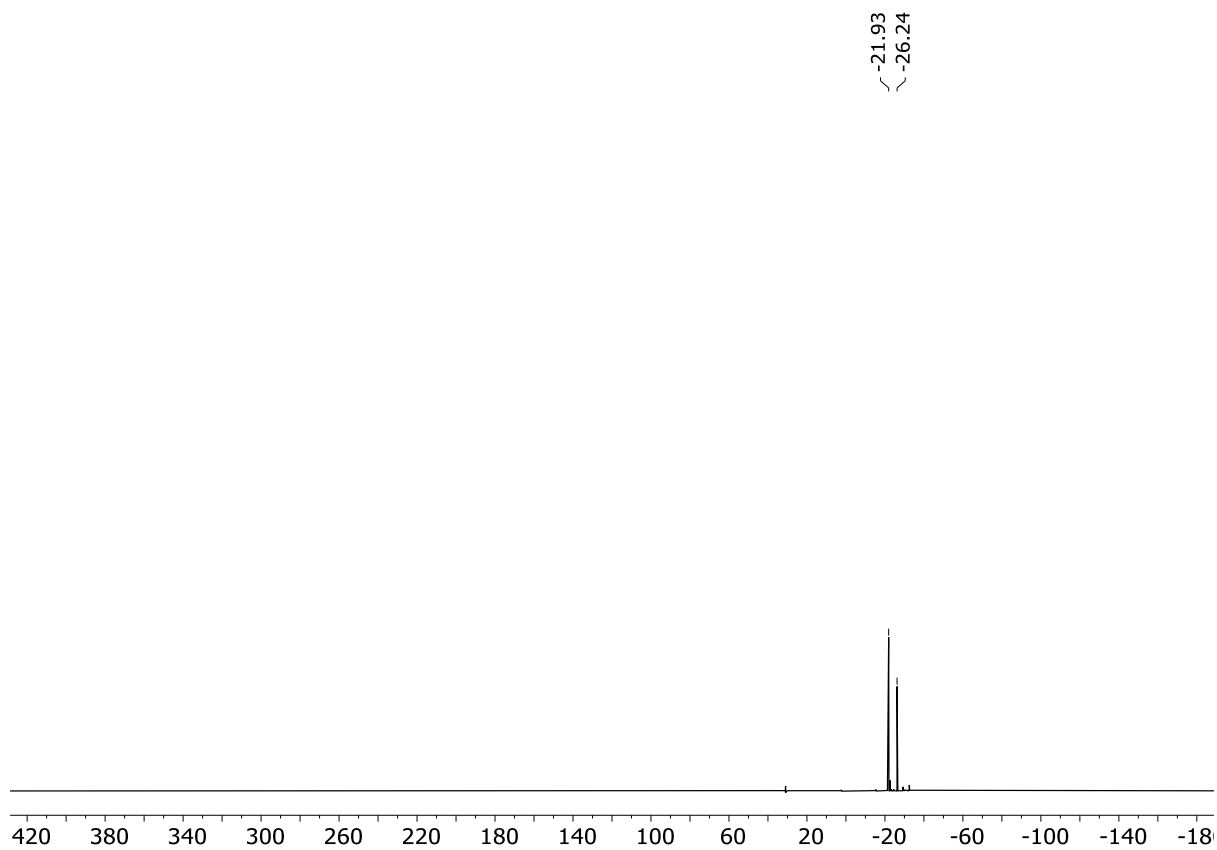

Figure S55:  $^{31}\text{P}\{^1\text{H}\}$  NMR spectrum of compound **5e** in  $\text{CDCl}_3$ .

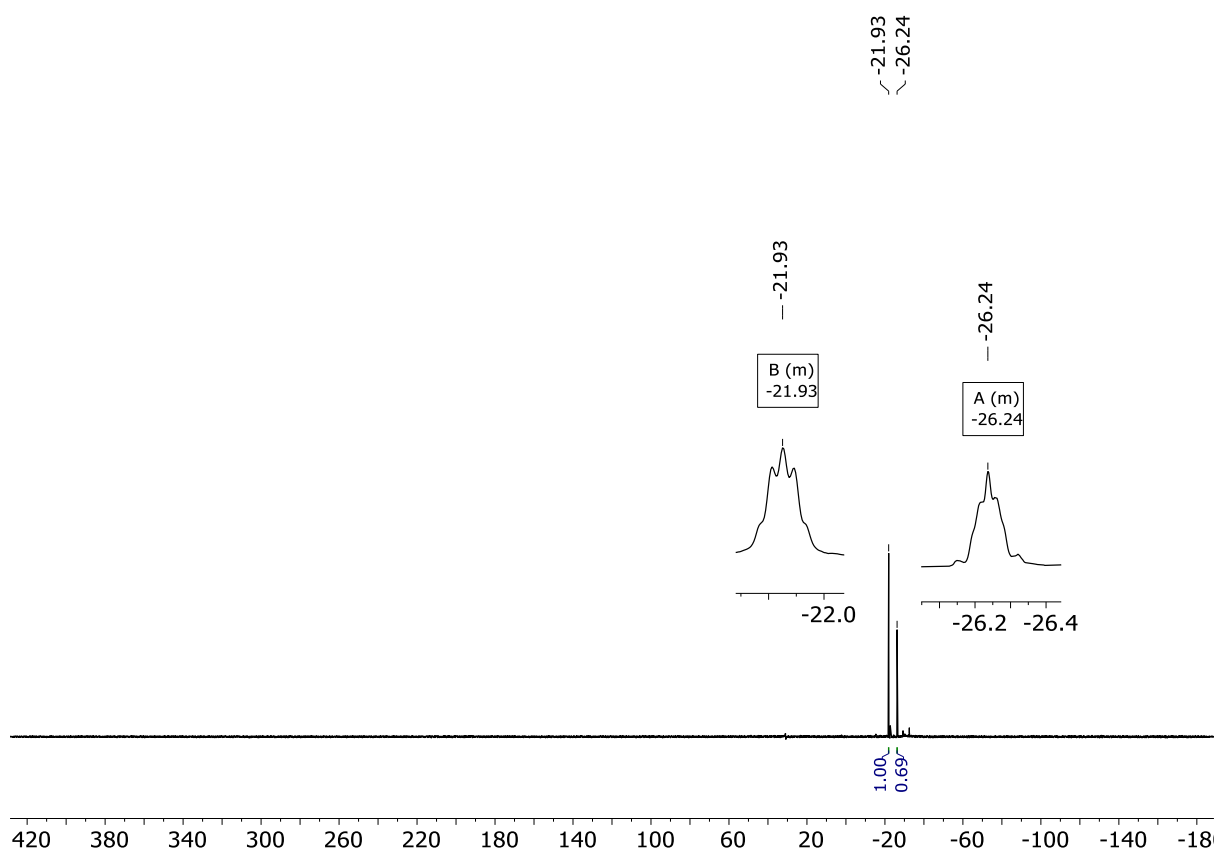

Figure S56:  $^{31}\text{P}$  NMR spectrum of compound **5e** in  $\text{CDCl}_3$ .

- 7.26 CDCl<sub>3</sub>

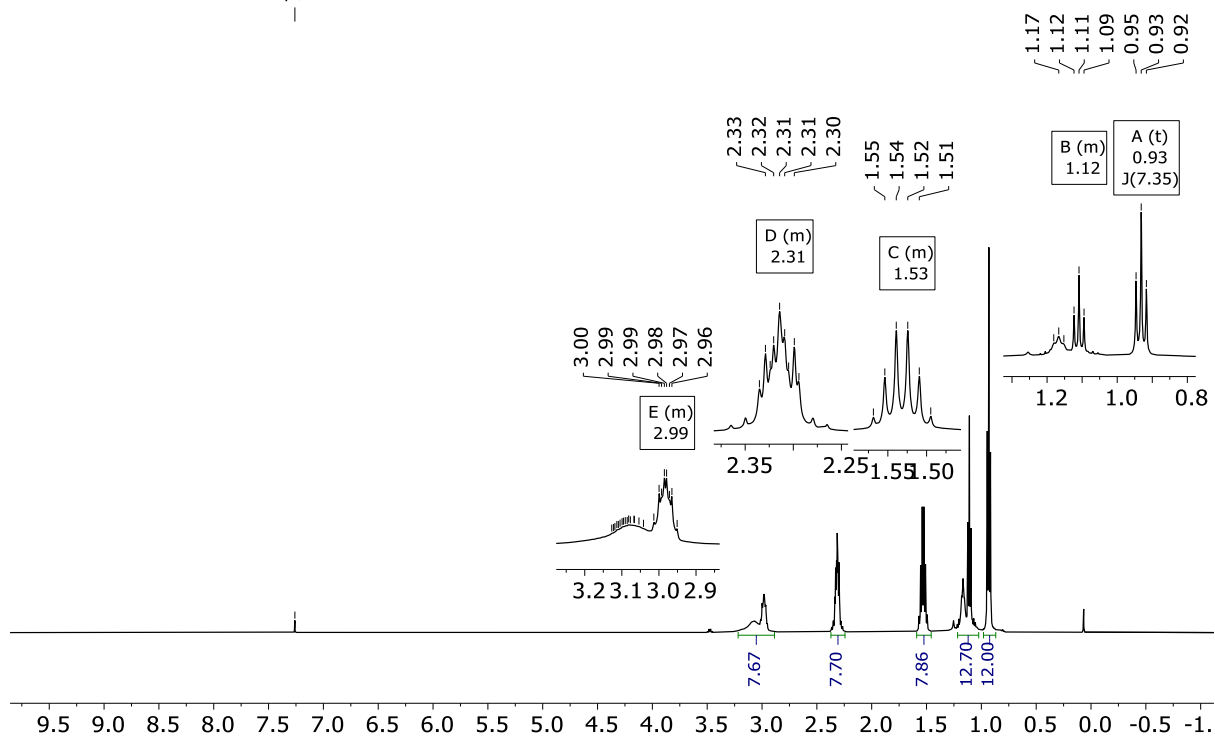

Figure S57: <sup>1</sup>H NMR spectrum of compound **5f** in CDCl<sub>3</sub>.

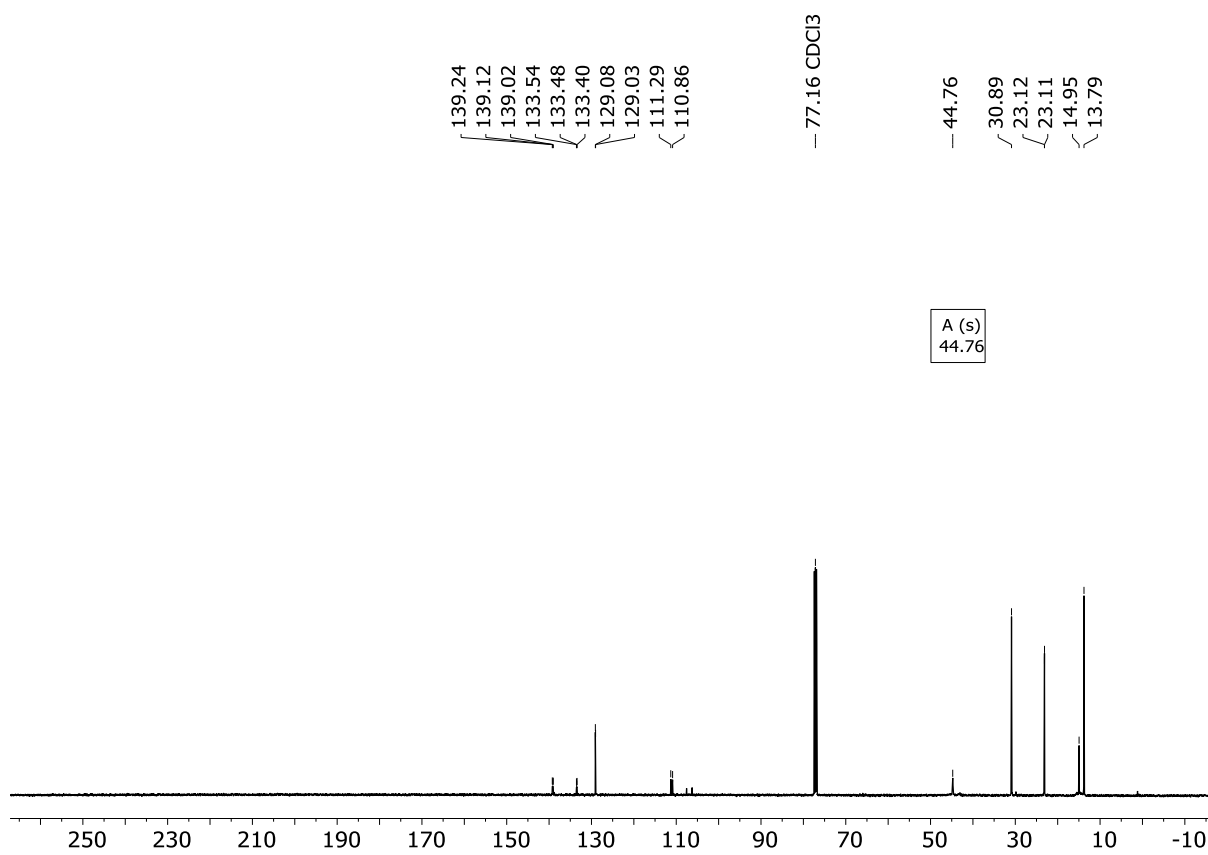

Figure S58: <sup>13</sup>C{<sup>1</sup>H} NMR spectrum of compound **5f** in CDCl<sub>3</sub>.

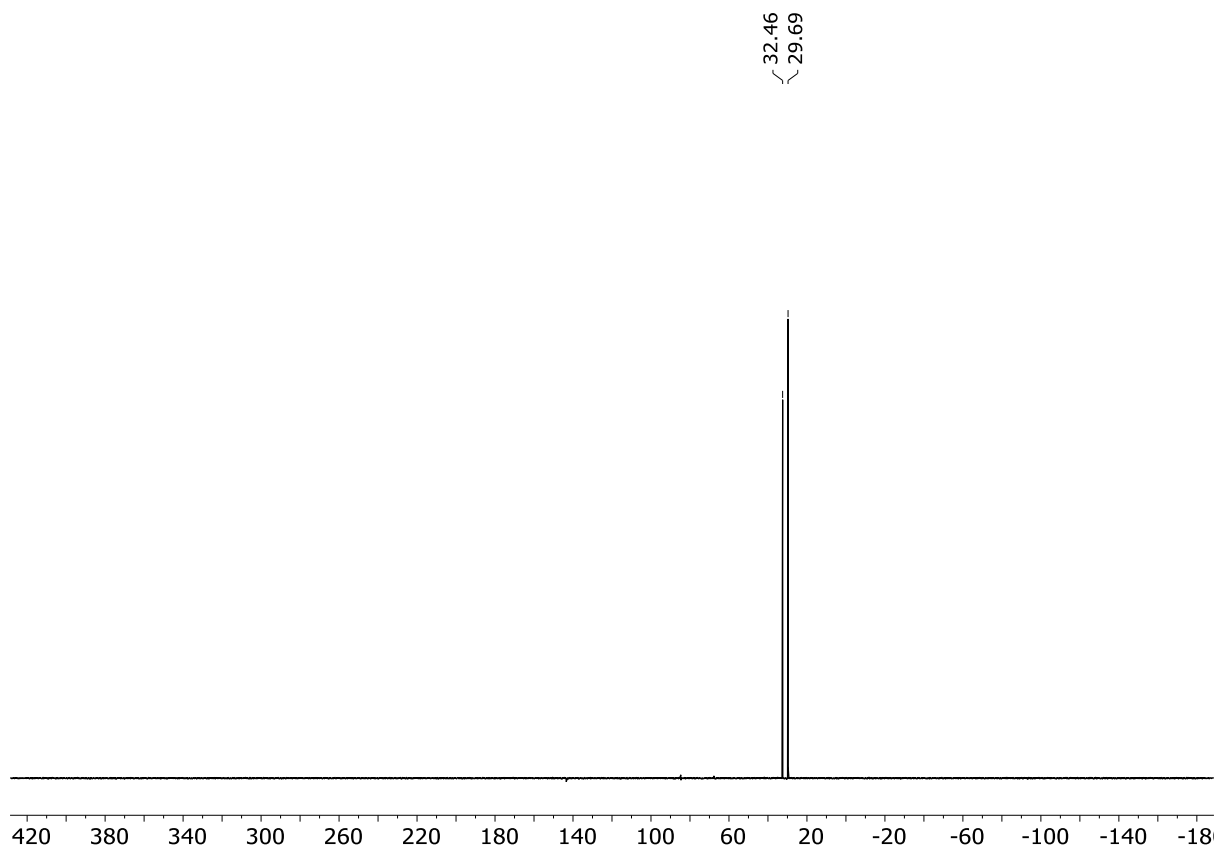

Figure S59:  $^{31}\text{P}\{^1\text{H}\}$  NMR spectrum of compound **5f** in  $\text{CDCl}_3$ .

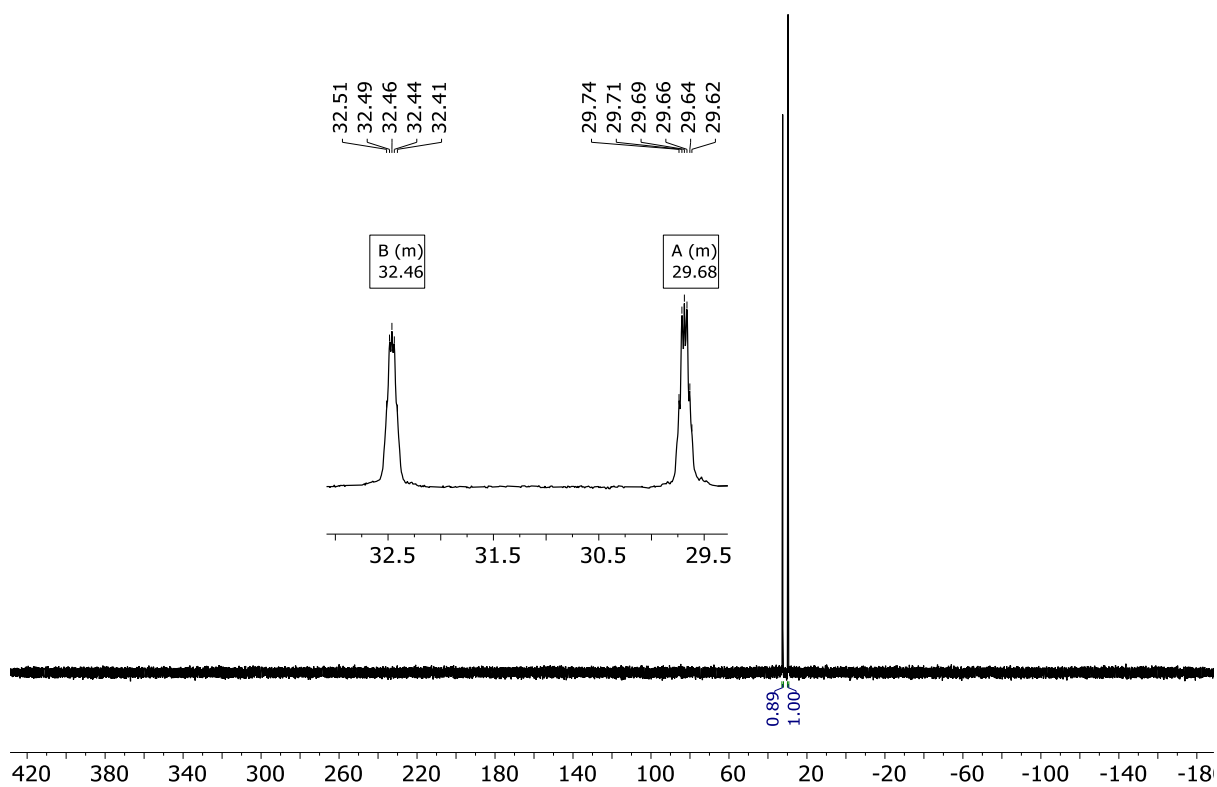

Figure S60:  $^{31}\text{P}$  NMR spectrum of compound **5f** in  $\text{CDCl}_3$ .



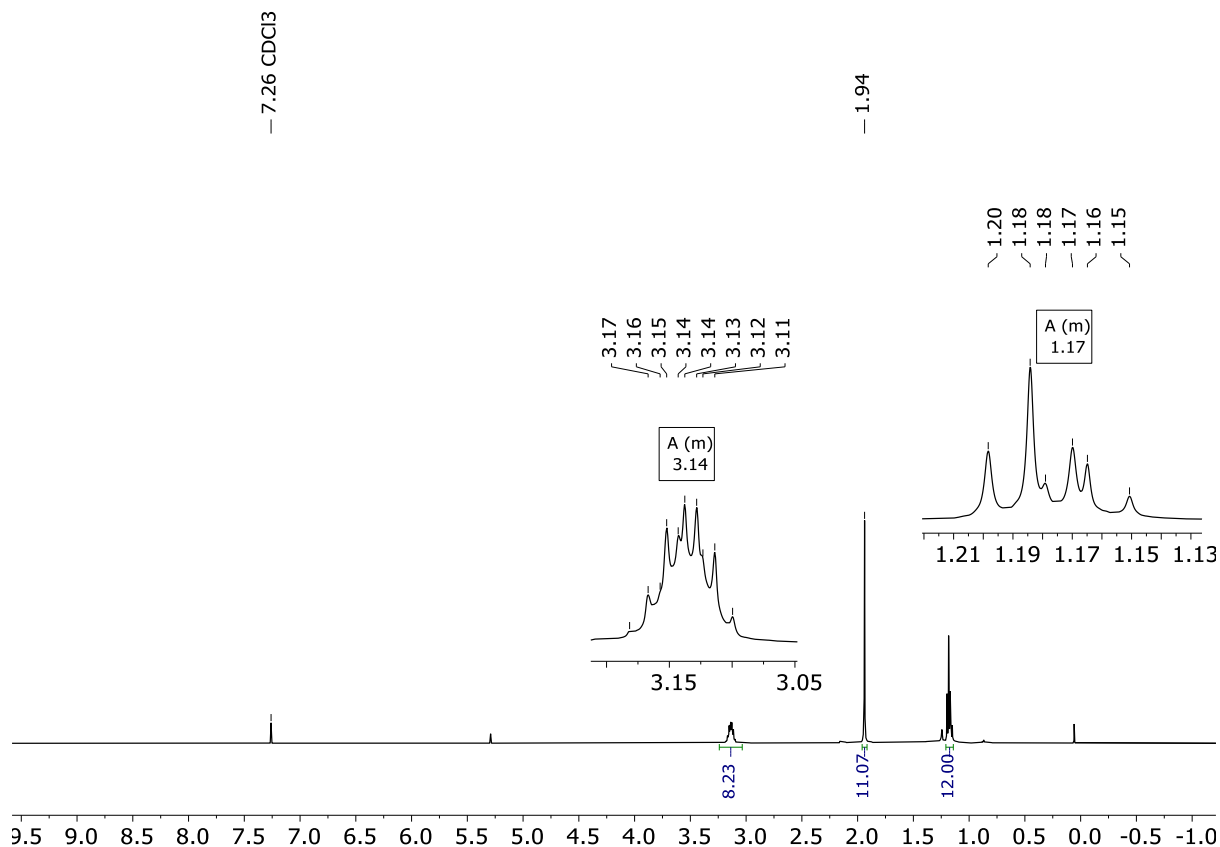

**Figure S61:** <sup>1</sup>H NMR spectrum of compound **6d** in CDCl<sub>3</sub>.

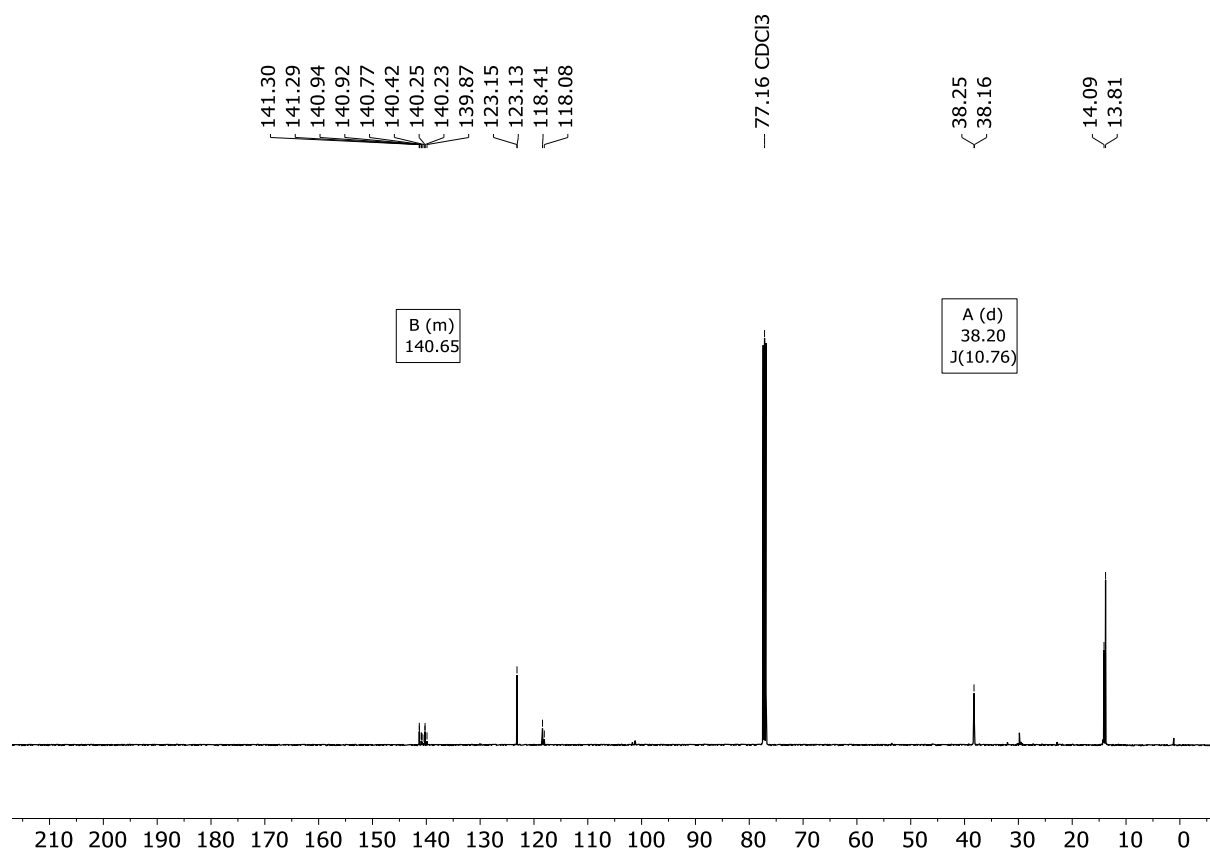

**Figure S62:** <sup>13</sup>C{<sup>1</sup>H} NMR spectrum of compound **6d** in CDCl<sub>3</sub>.

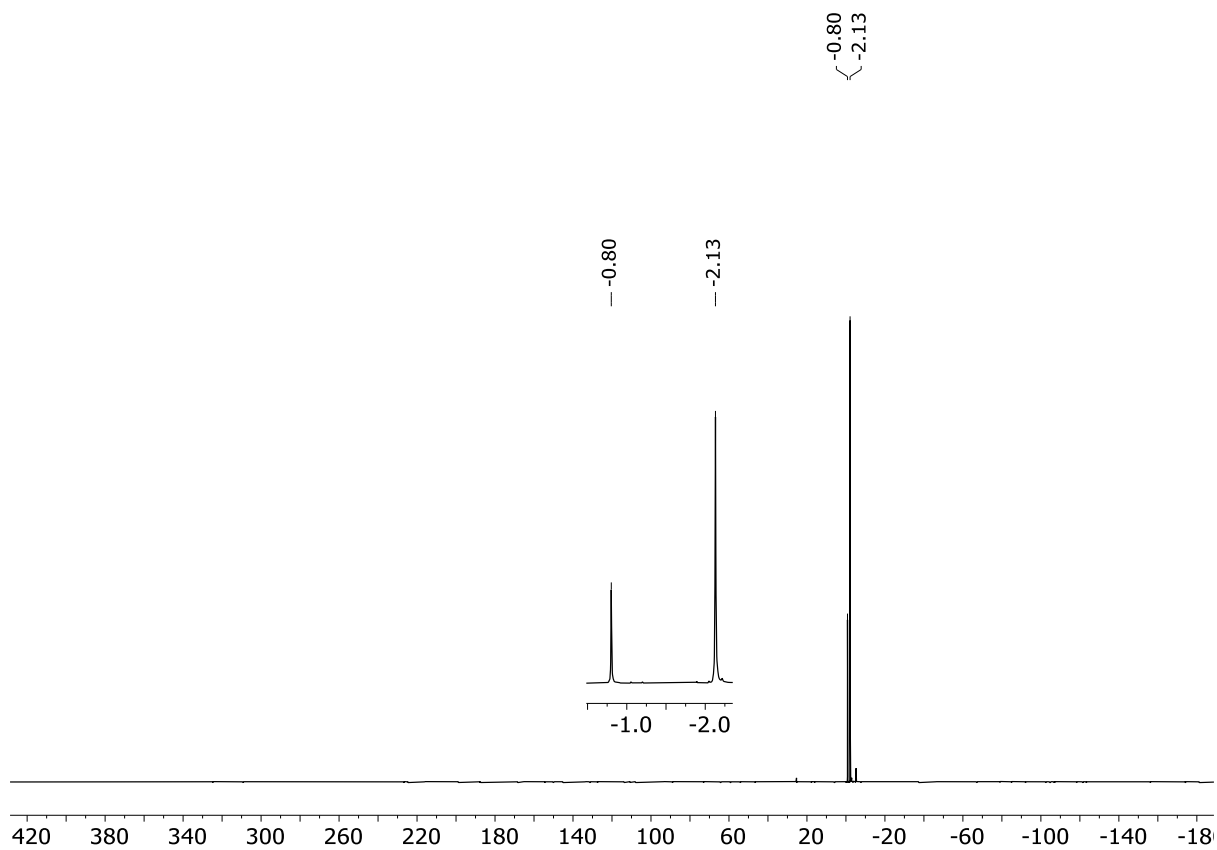

**Figure S63:**  $^{31}\text{P}\{^1\text{H}\}$  NMR spectrum of compound **6d** in  $\text{CDCl}_3$ .

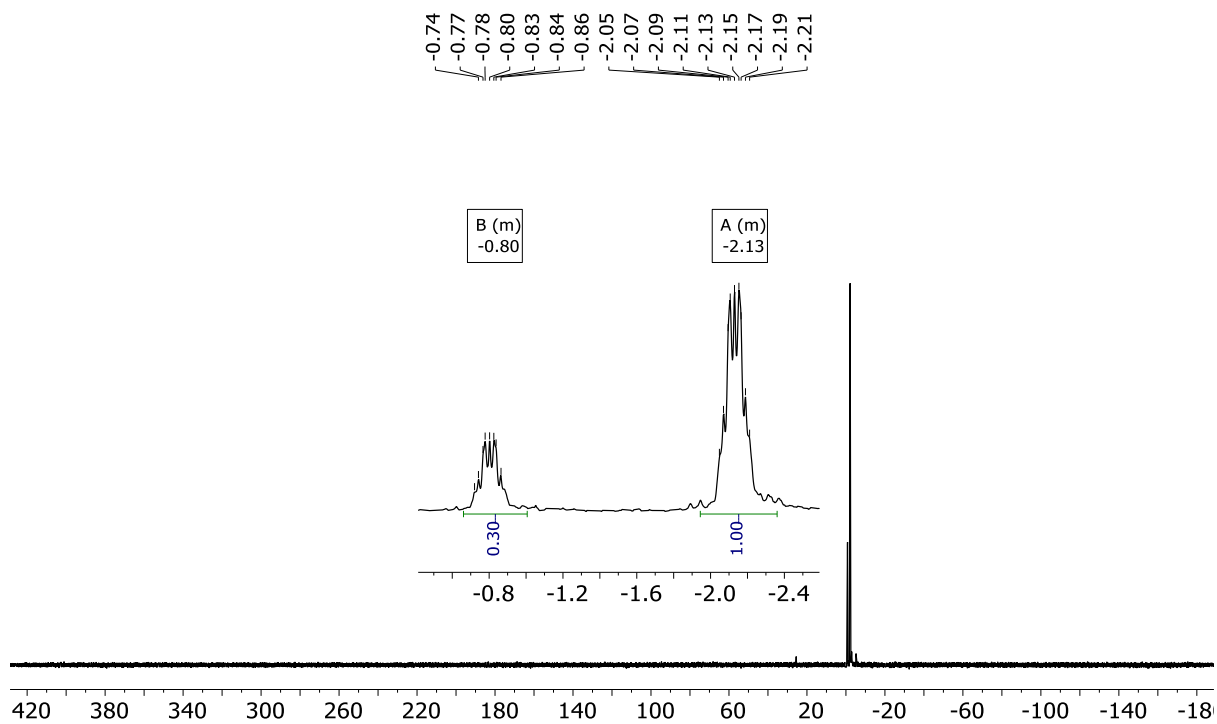

**Figure S64:**  $^{31}\text{P}$  NMR spectrum of compound **6d** in  $\text{CDCl}_3$ .

- 7.26 CDCl<sub>3</sub>

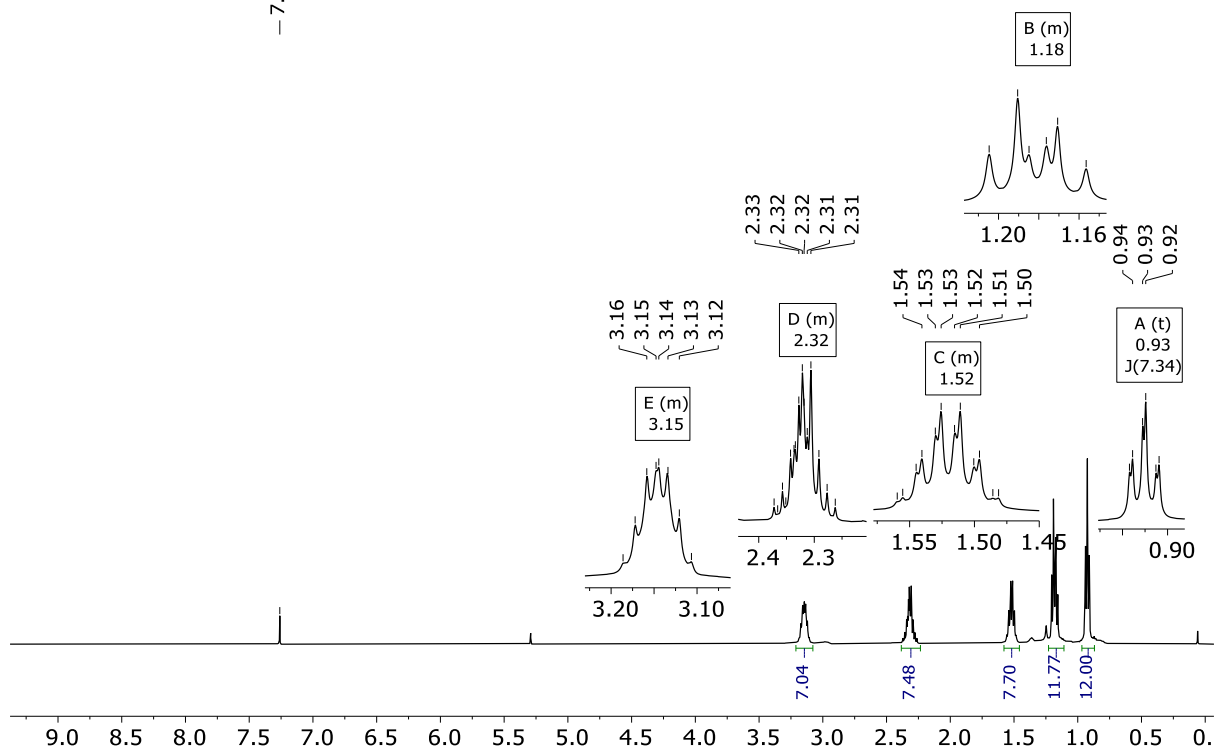

Figure S65: <sup>1</sup>H NMR spectrum of compound **6f** in CDCl<sub>3</sub>.

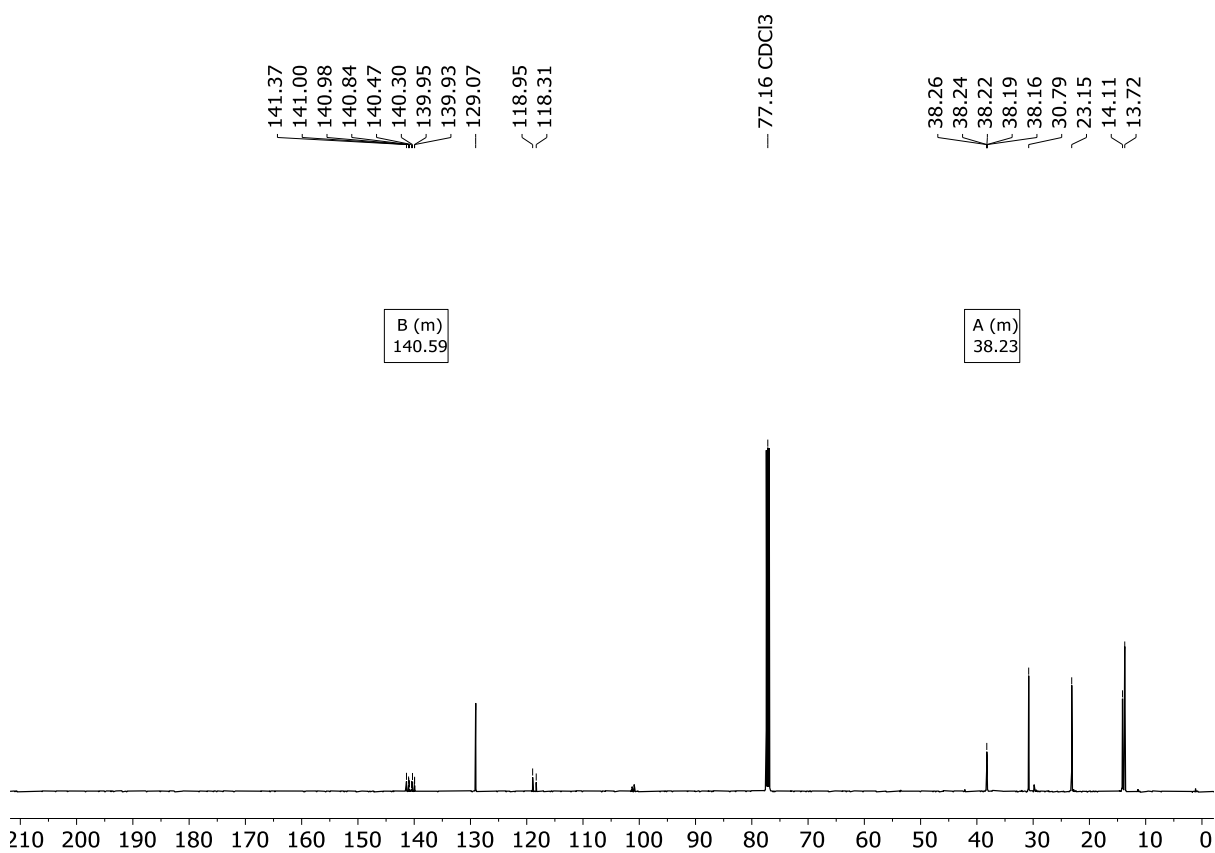

Figure S66: <sup>13</sup>C{<sup>1</sup>H} NMR spectrum of compound **6f** in CDCl<sub>3</sub>.

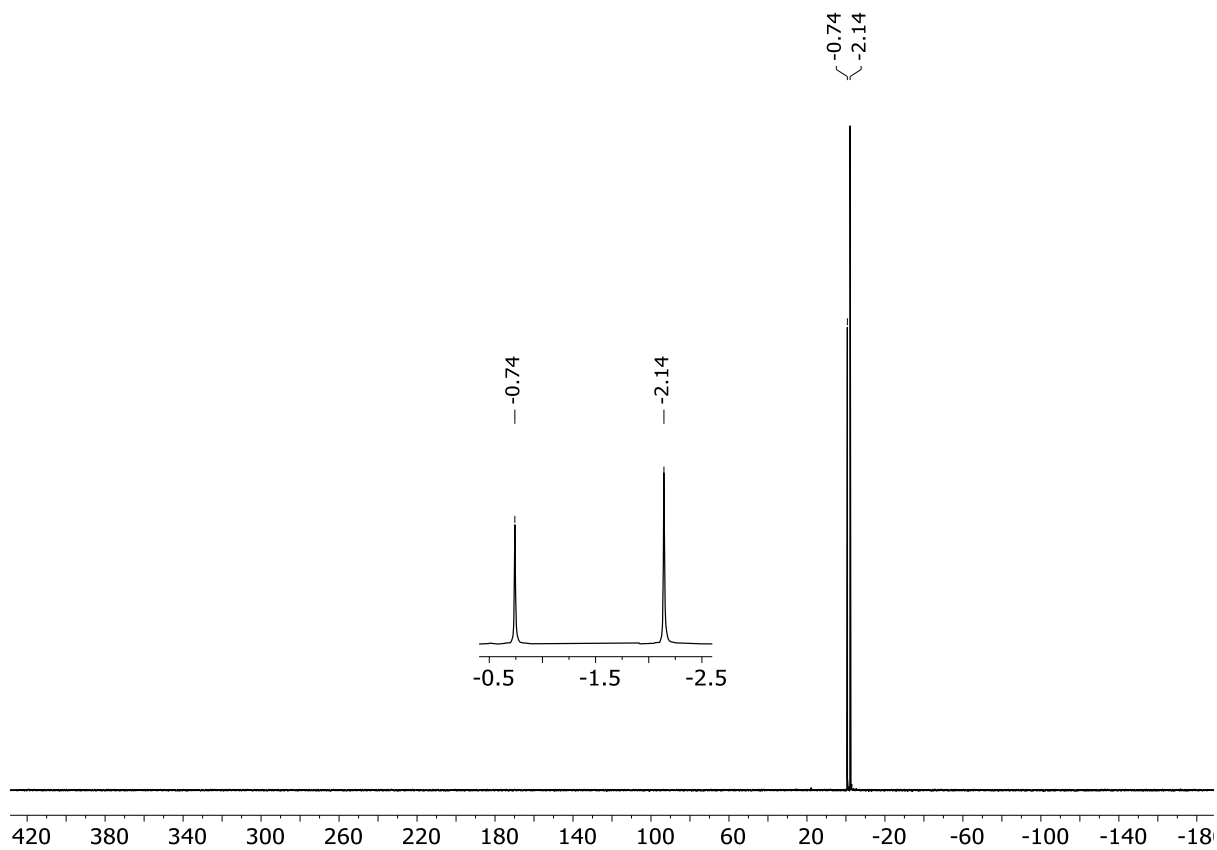

Figure S67:  $^{31}\text{P}\{^1\text{H}\}$  NMR spectrum of compound **6f** in  $\text{CDCl}_3$ .

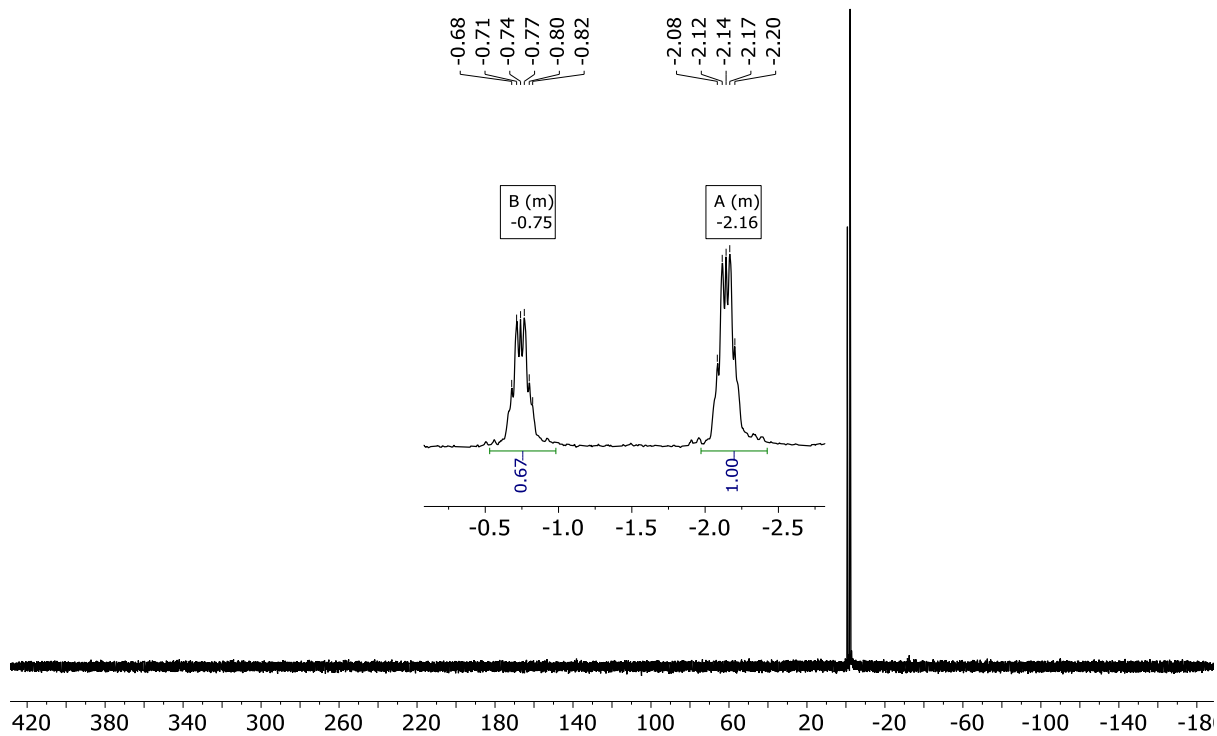

Figure S68:  $^{31}\text{P}$  NMR spectrum of compound **6f** in  $\text{CDCl}_3$ .

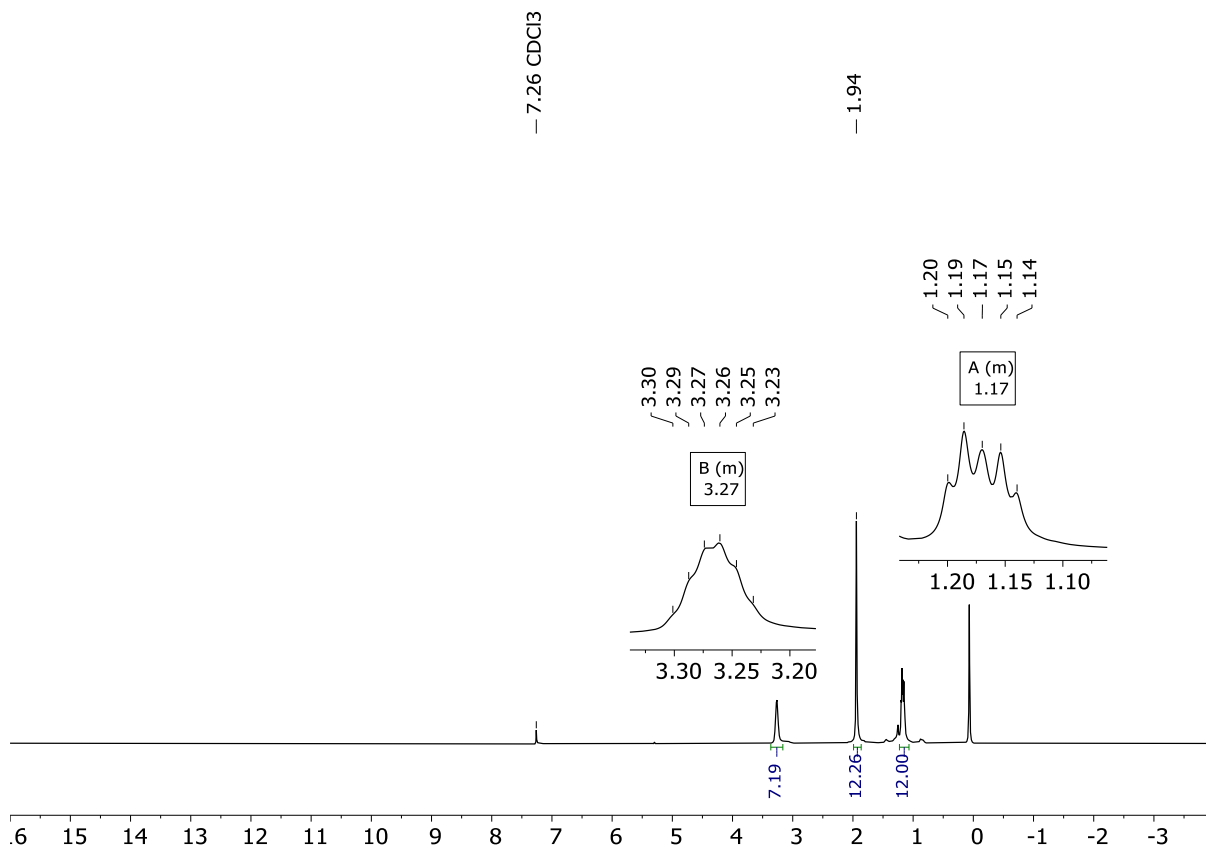

Figure S69: <sup>1</sup>H NMR spectrum of compound **7d** in CDCl<sub>3</sub>.

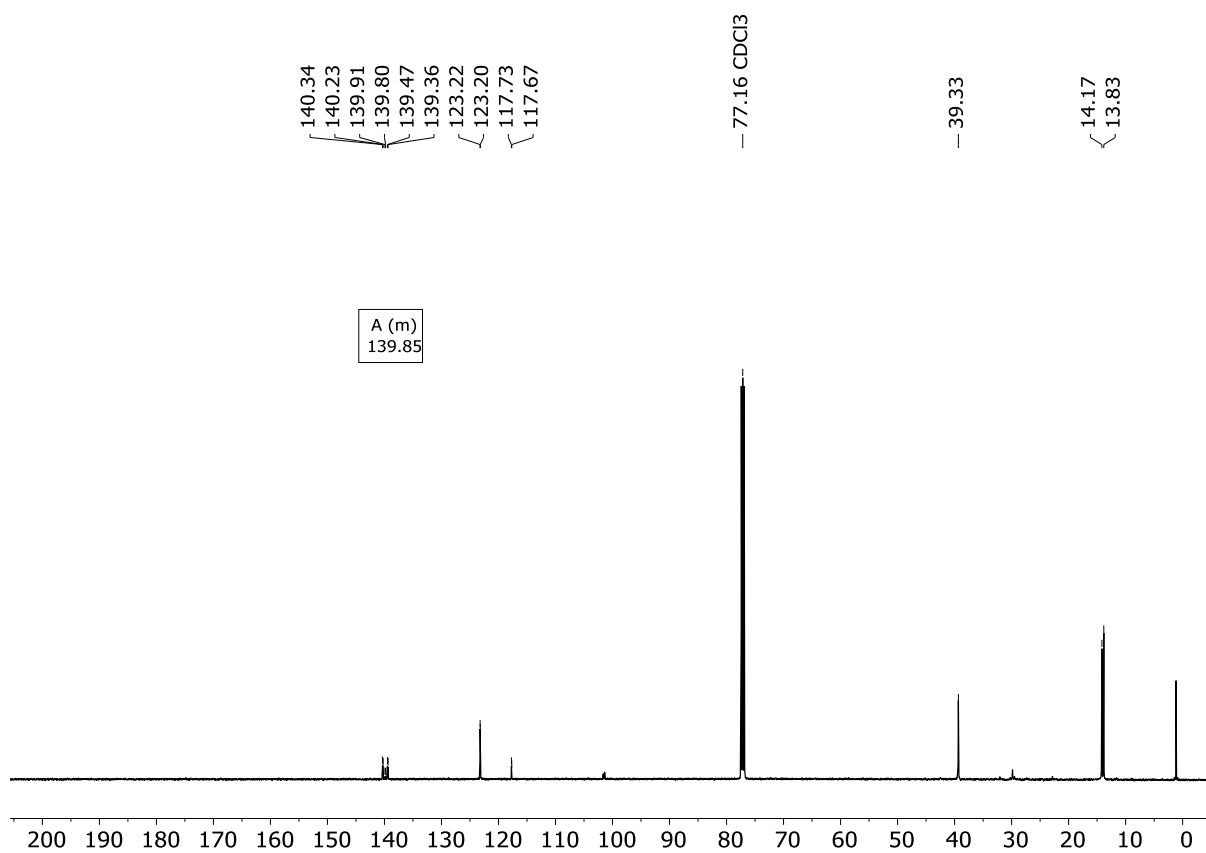

Figure S70: <sup>13</sup>C{<sup>1</sup>H} NMR spectrum of compound **7d** in CDCl<sub>3</sub>.

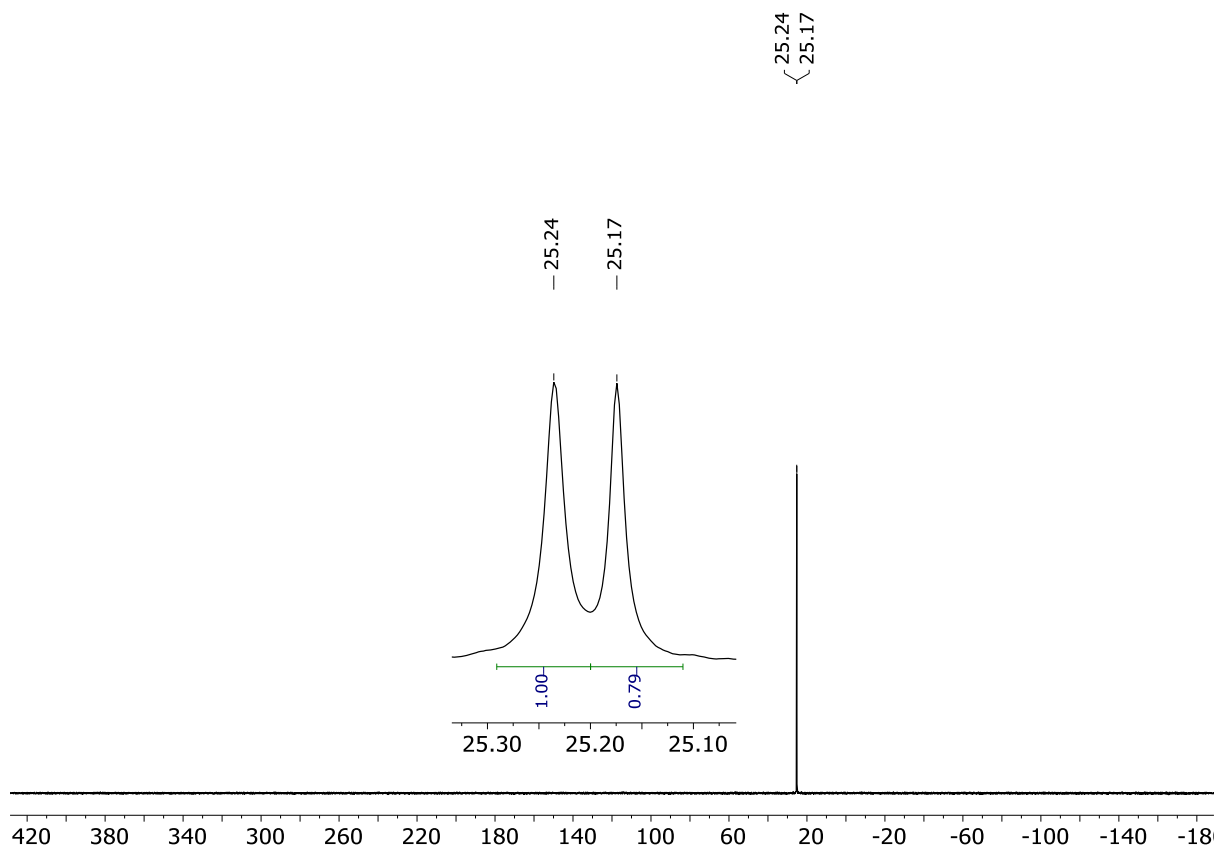

Figure S71:  $^{31}\text{P}\{^1\text{H}\}$  NMR spectrum of compound **7d** in  $\text{CDCl}_3$ .

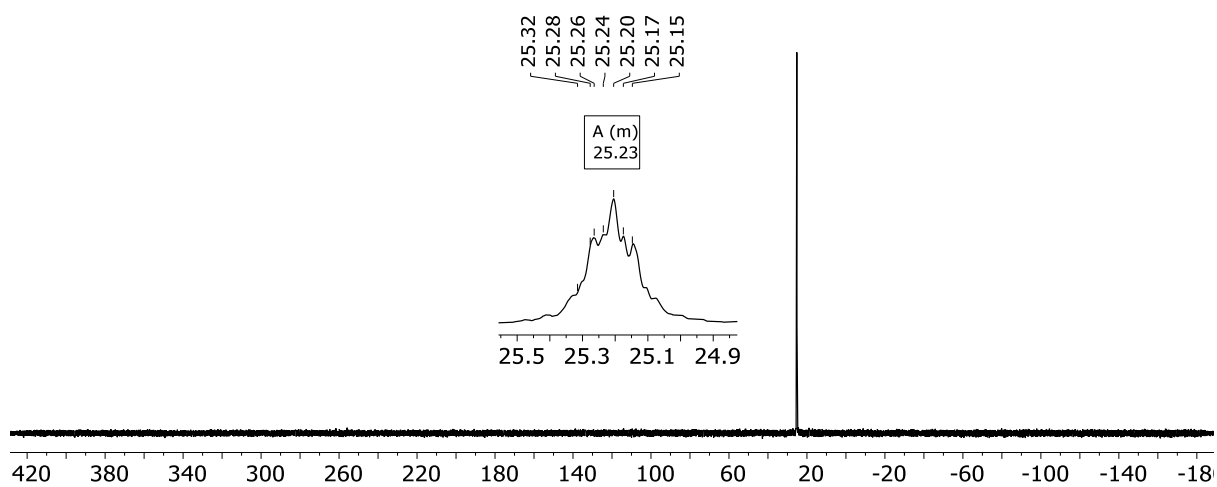

Figure S72:  $^{31}\text{P}$  NMR spectrum of compound **7d** in  $\text{CDCl}_3$ .

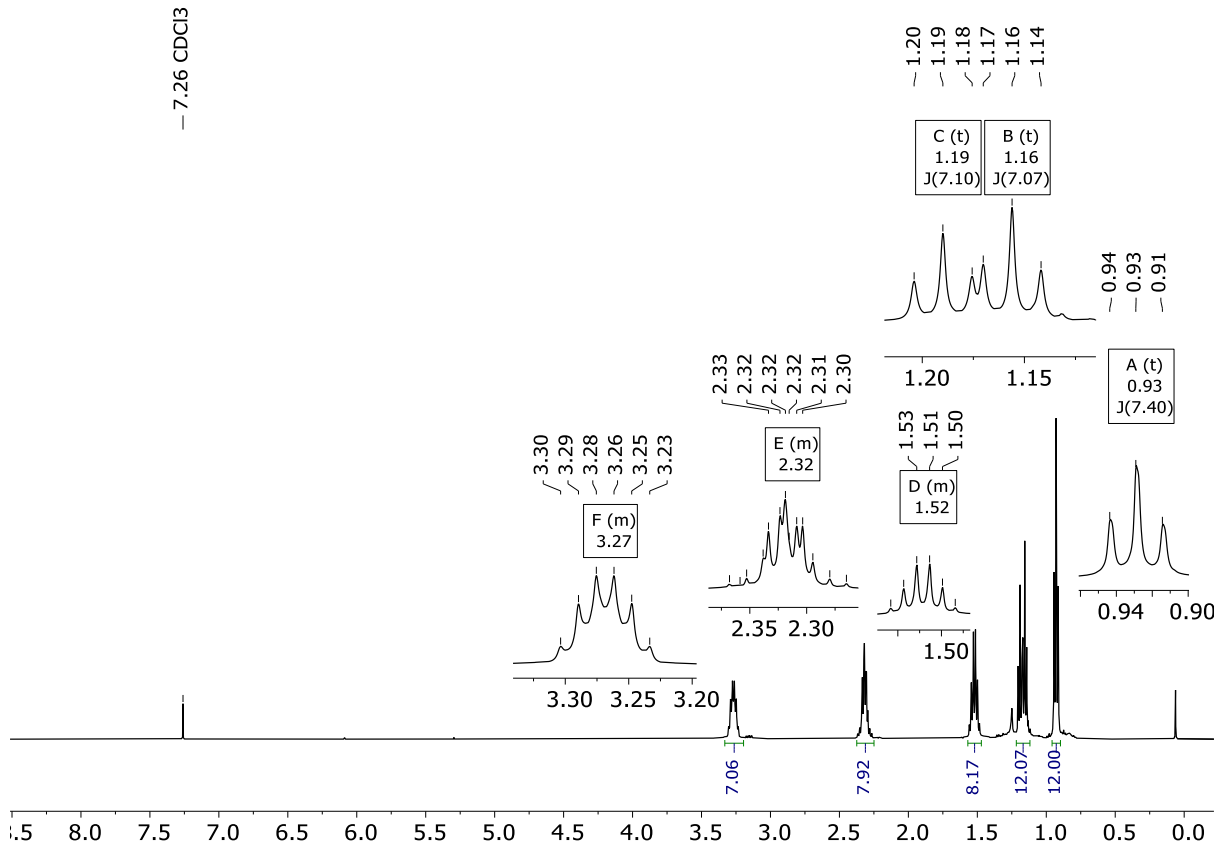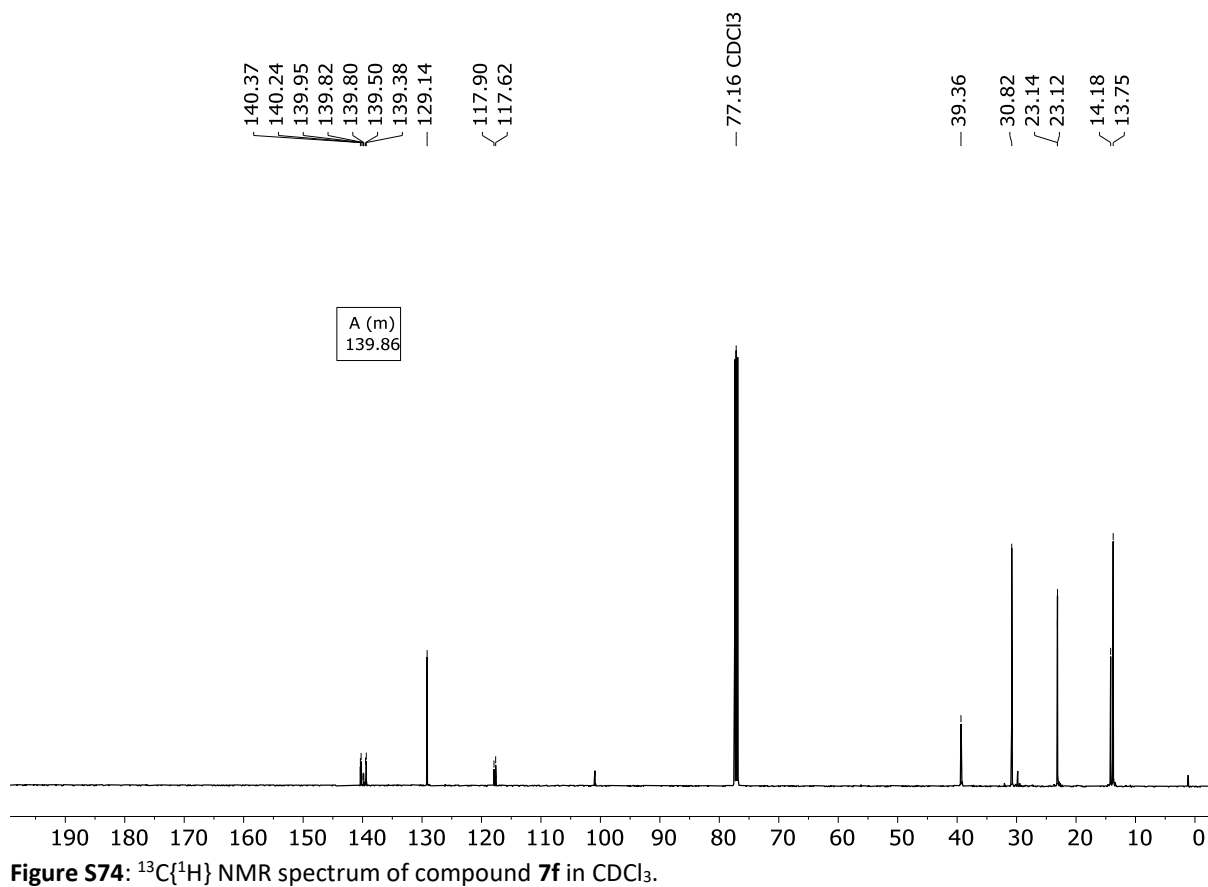

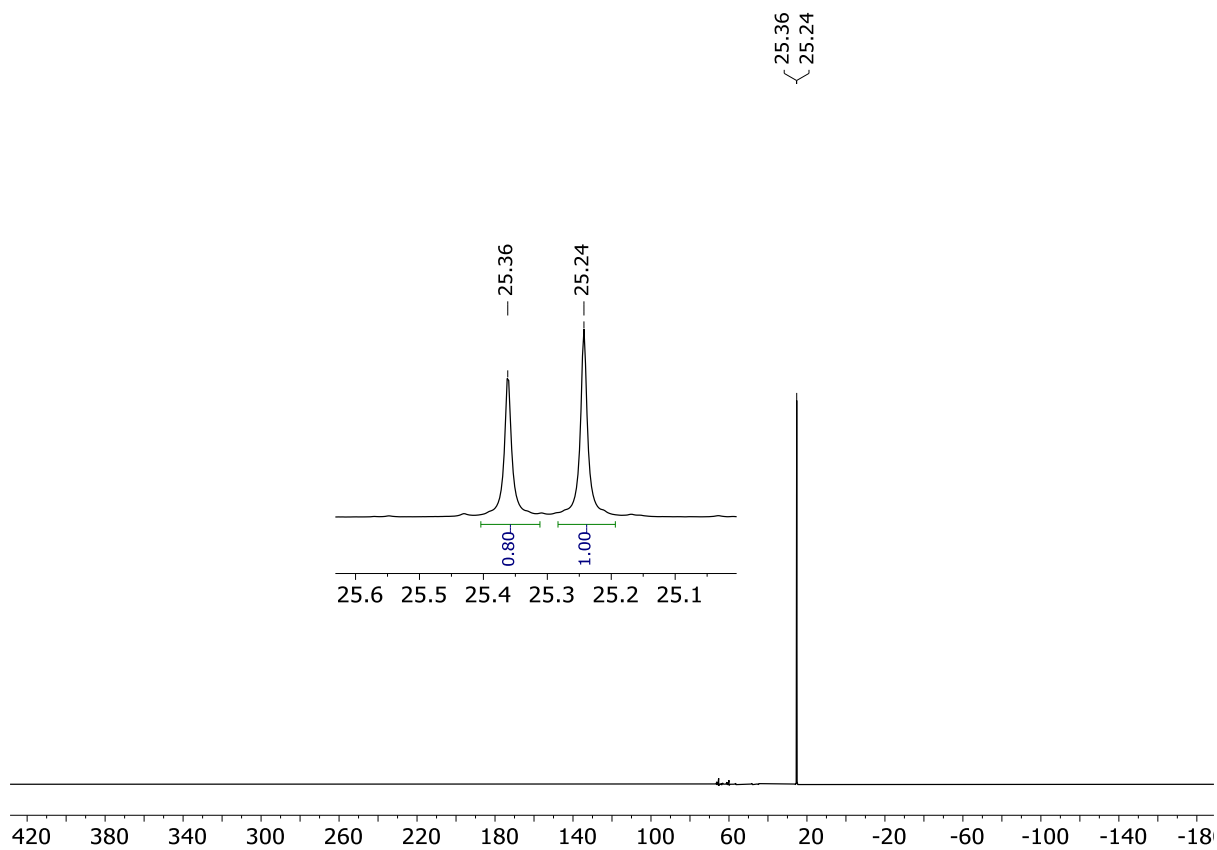

Figure S75: <sup>31</sup>P{<sup>1</sup>H} NMR spectrum of compound **7f** in CDCl<sub>3</sub>.

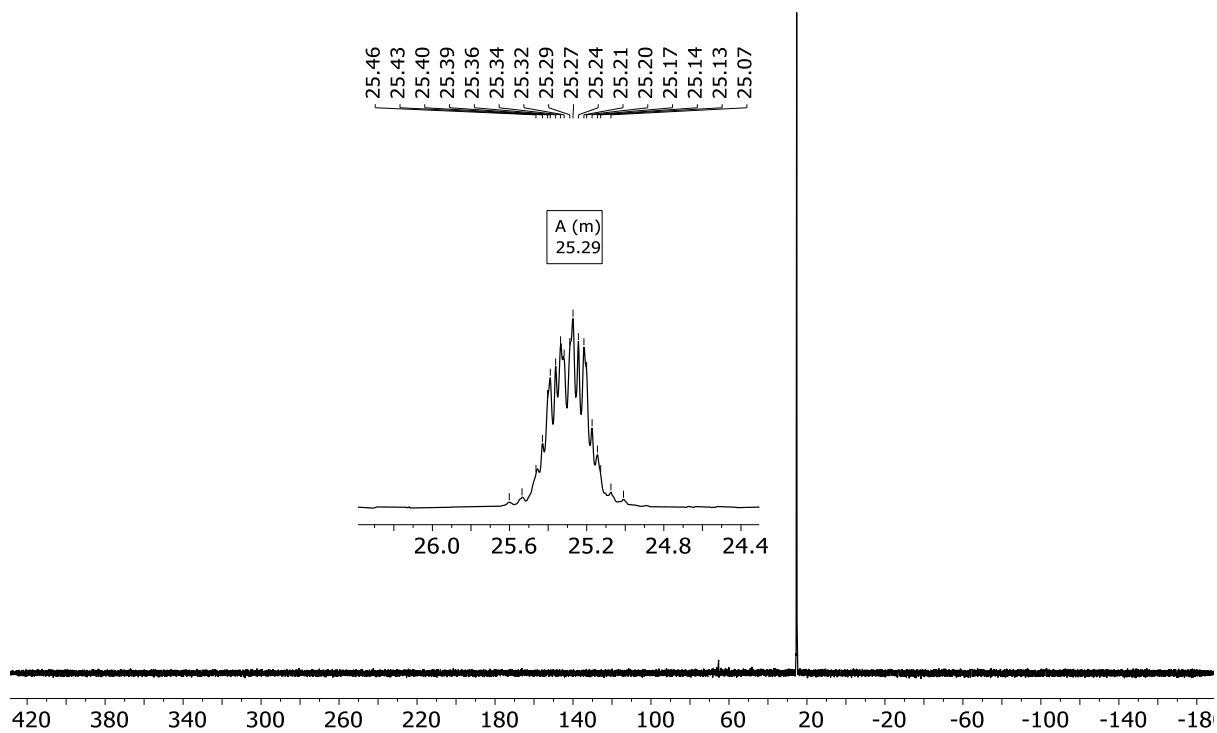

Figure S76: <sup>31</sup>P NMR spectrum of compound **7f** in CDCl<sub>3</sub>.



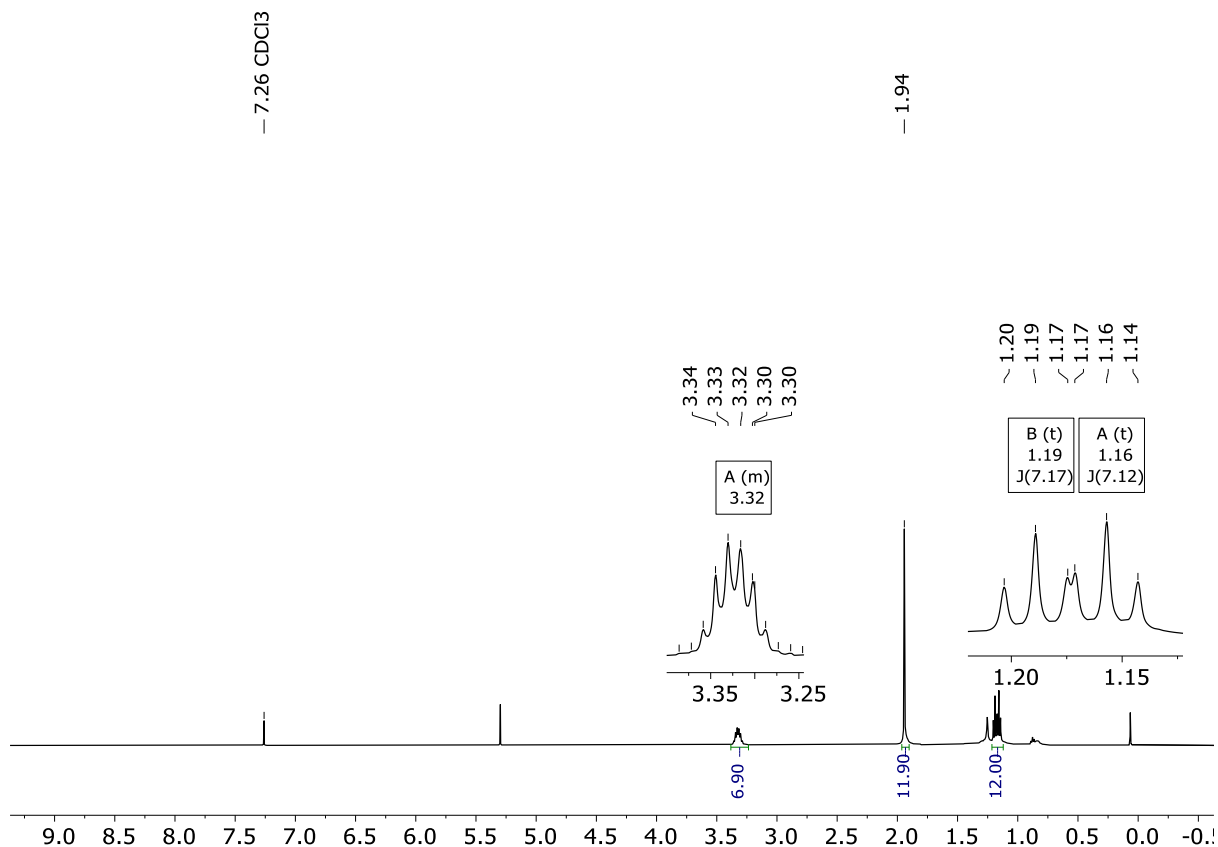

Figure S77: <sup>1</sup>H NMR spectrum of compound **8d** in CDCl<sub>3</sub>.

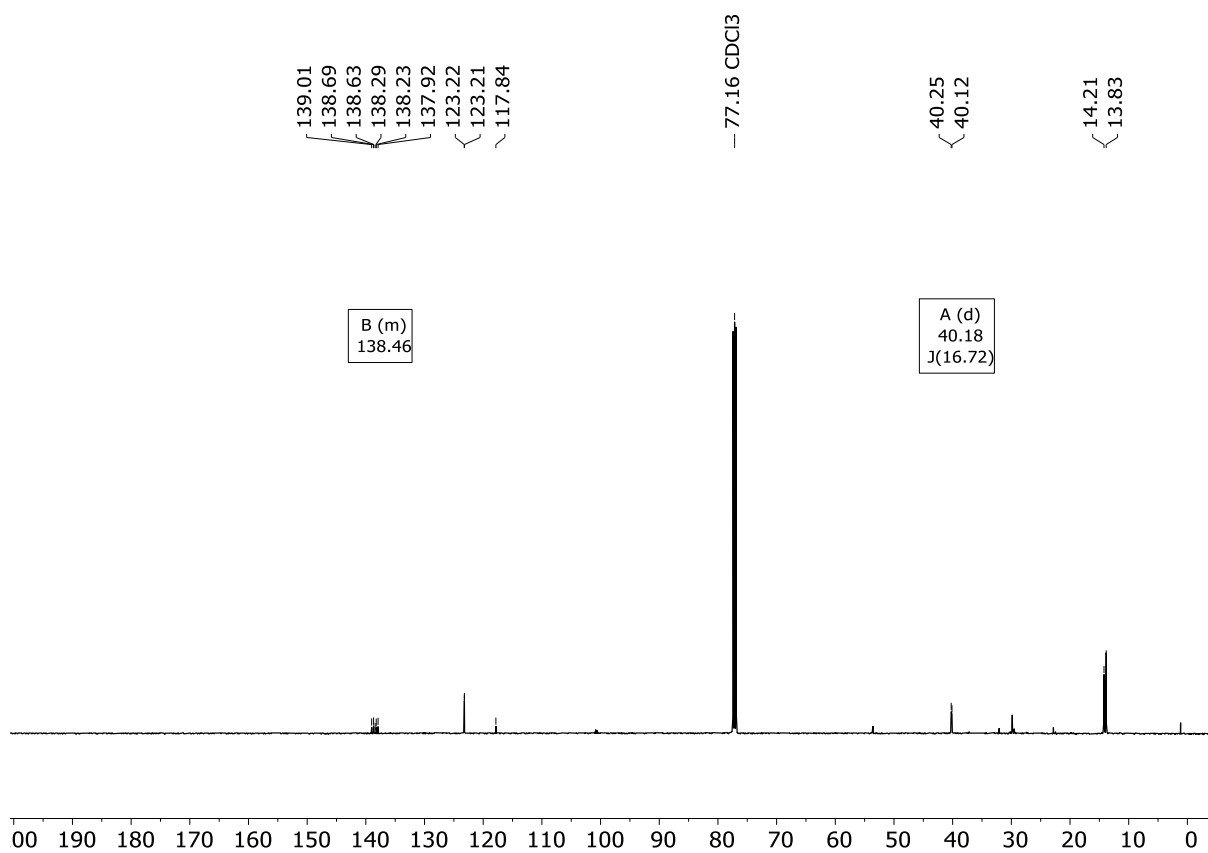

Figure S78: <sup>13</sup>C{<sup>1</sup>H} NMR spectrum of compound **8d** in CDCl<sub>3</sub>.

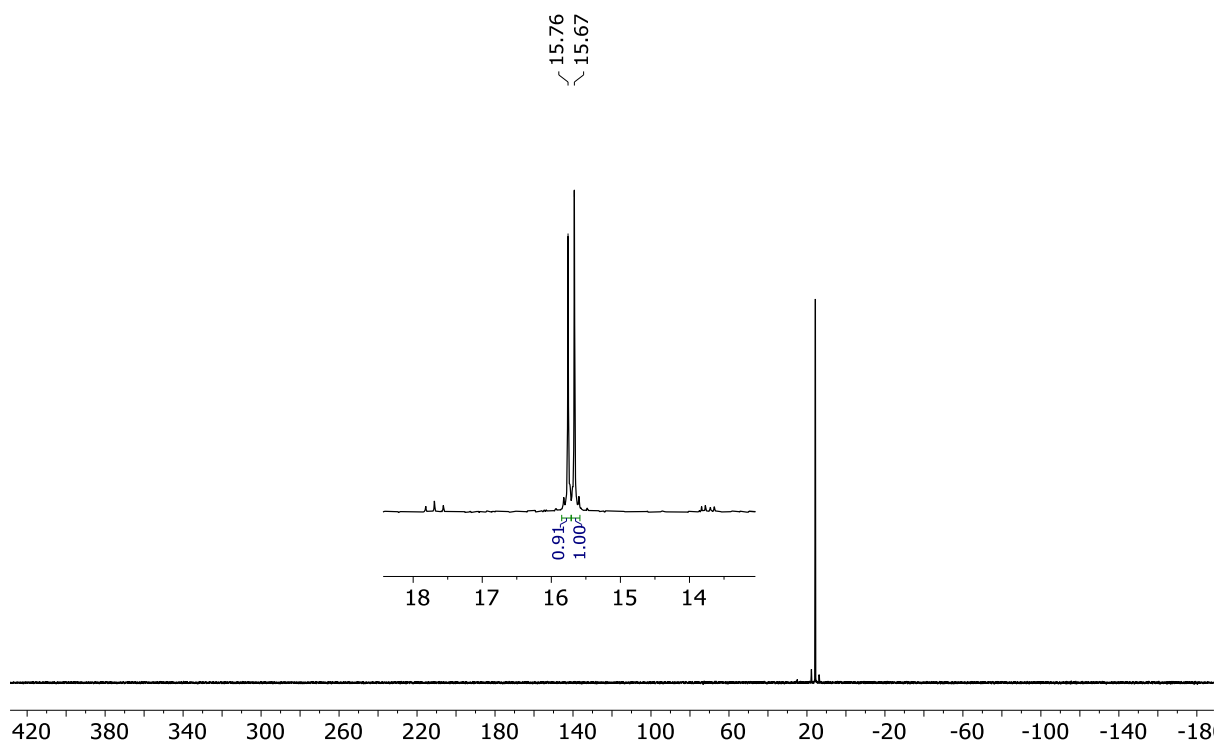

**Figure S79:** <sup>31</sup>P{<sup>1</sup>H} NMR spectrum of compound **8d** in CDCl<sub>3</sub>.

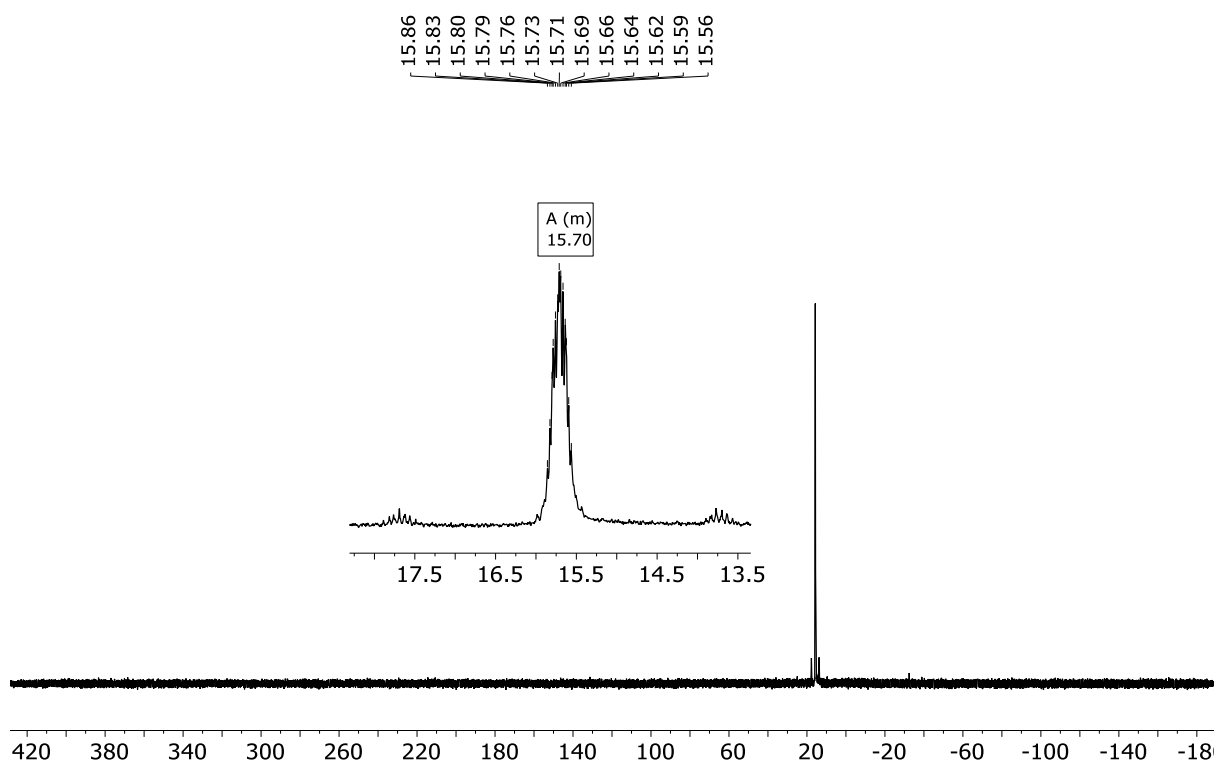

**Figure S80:** <sup>31</sup>P NMR spectrum of compound **8d** in CDCl<sub>3</sub>.

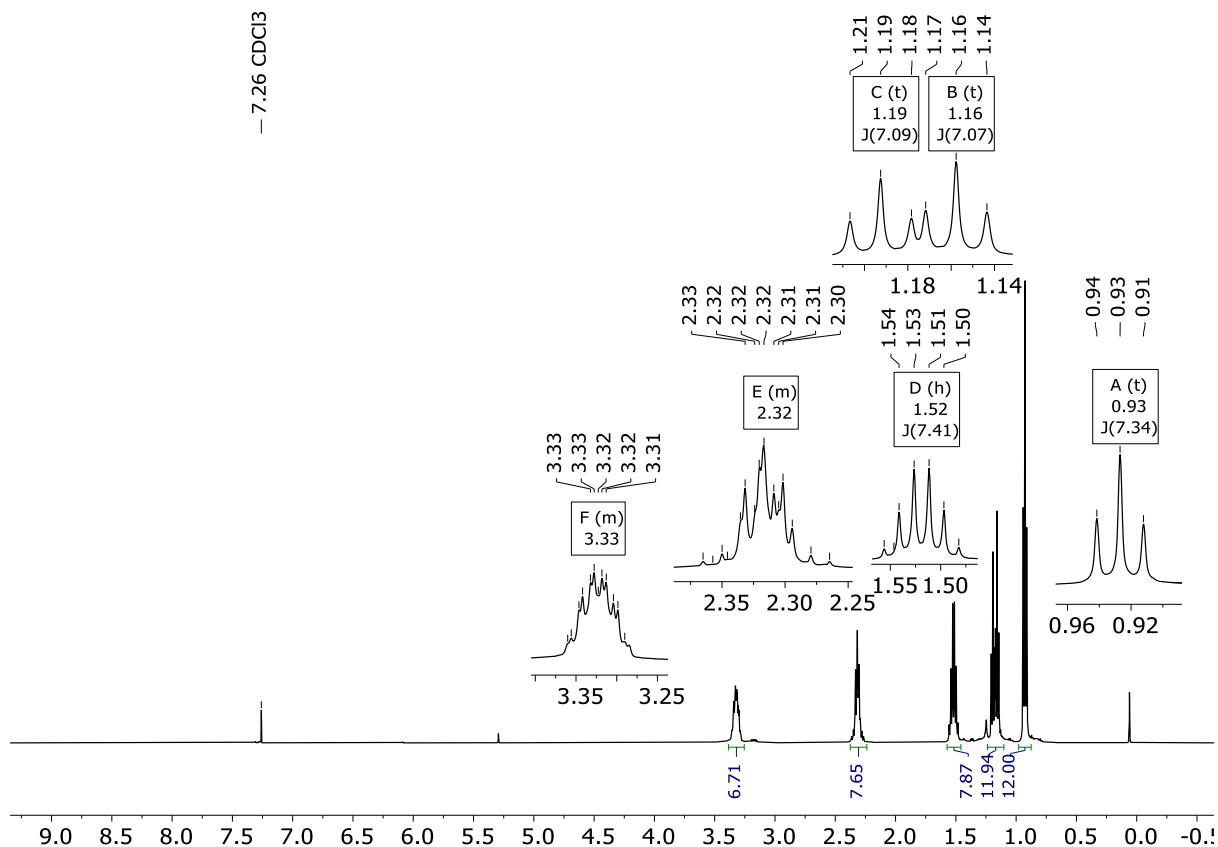

Figure S81: <sup>1</sup>H NMR spectrum of compound **8f** in CDCl<sub>3</sub>.

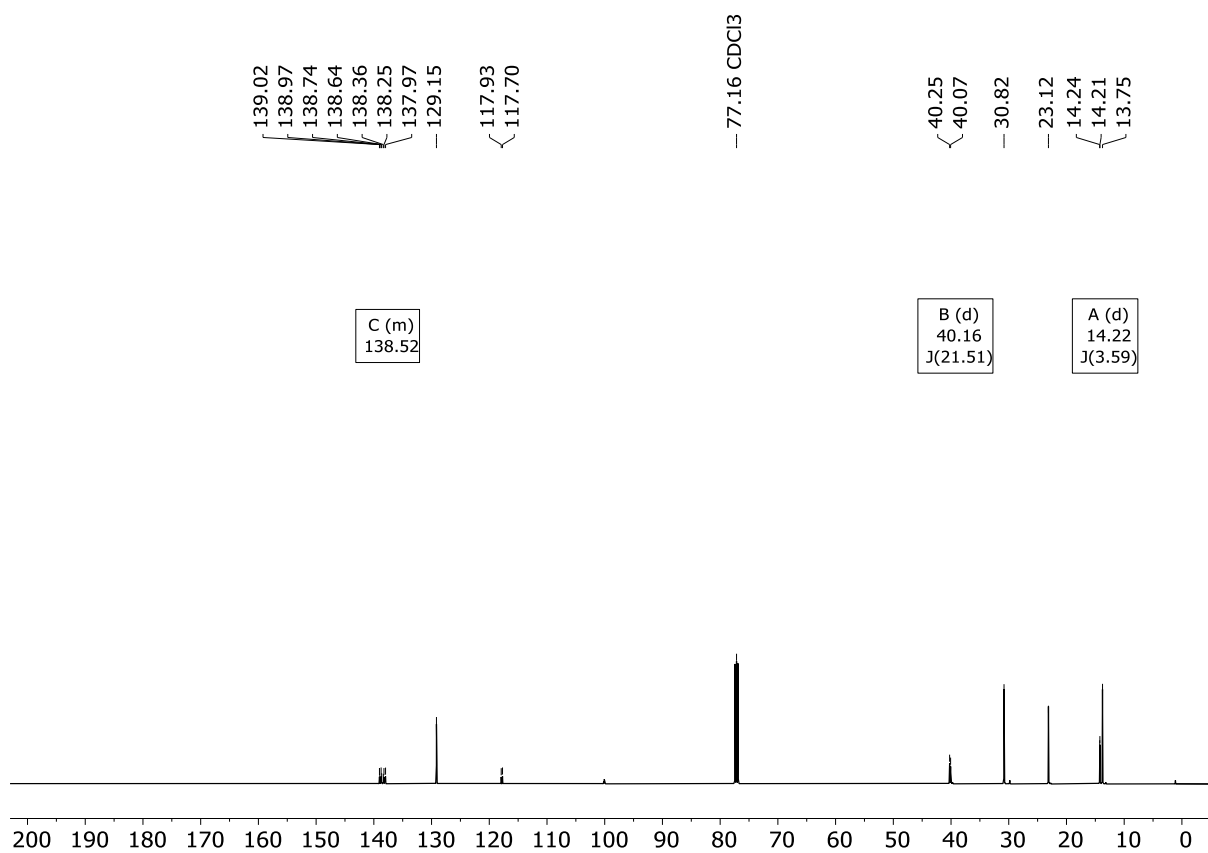

Figure S82: <sup>13</sup>C{<sup>1</sup>H} NMR spectrum of compound **8f** in CDCl<sub>3</sub>.

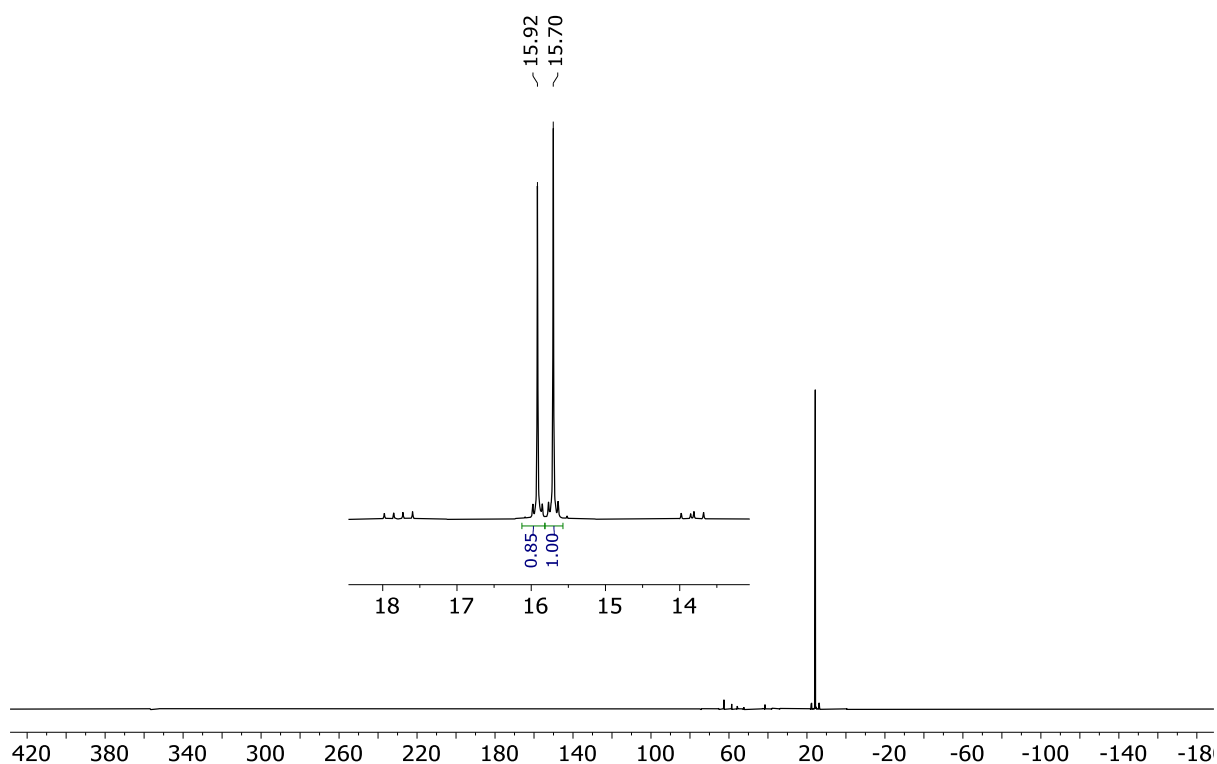

Figure S83: <sup>31</sup>P{<sup>1</sup>H} NMR spectrum of compound **8f** in CDCl<sub>3</sub>.

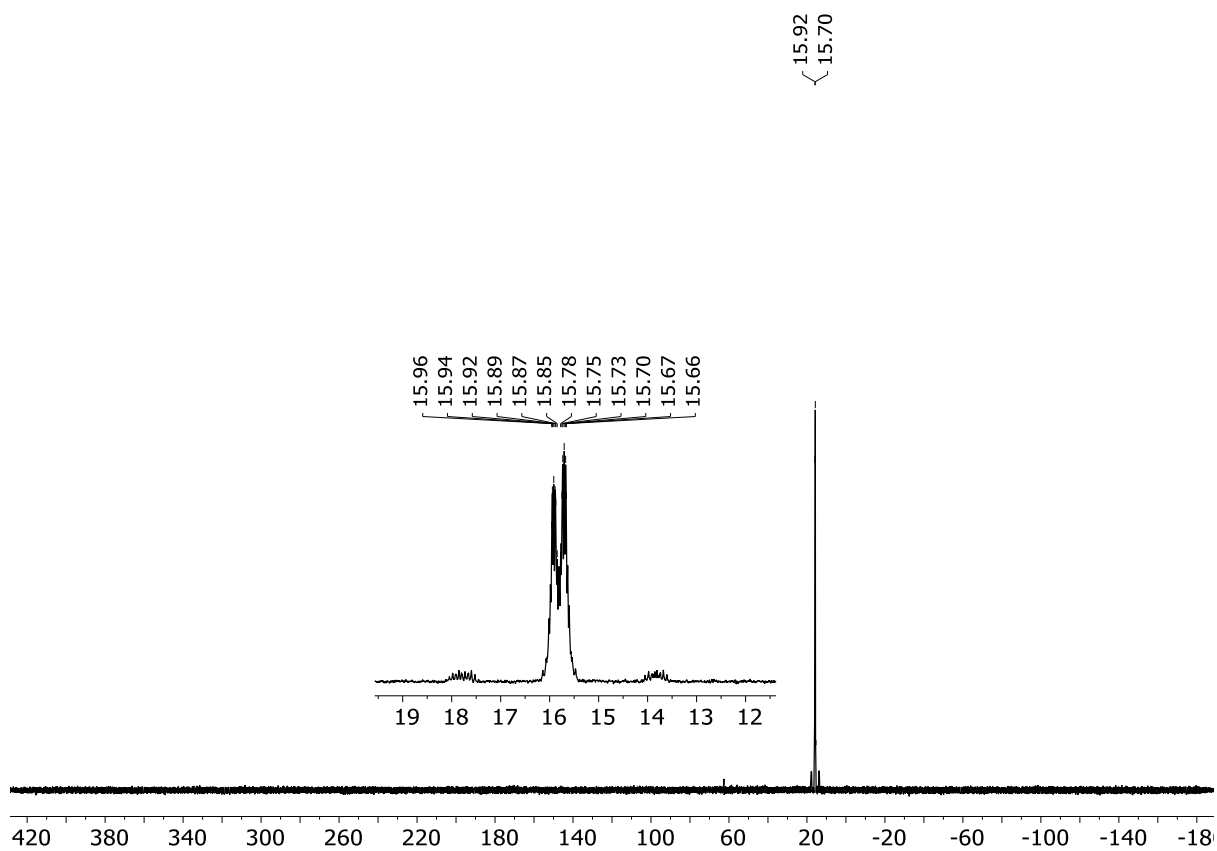

Figure S84: <sup>31</sup>P NMR spectrum of compound **8f** in CDCl<sub>3</sub>.

— 7.26 CDCl<sub>3</sub>

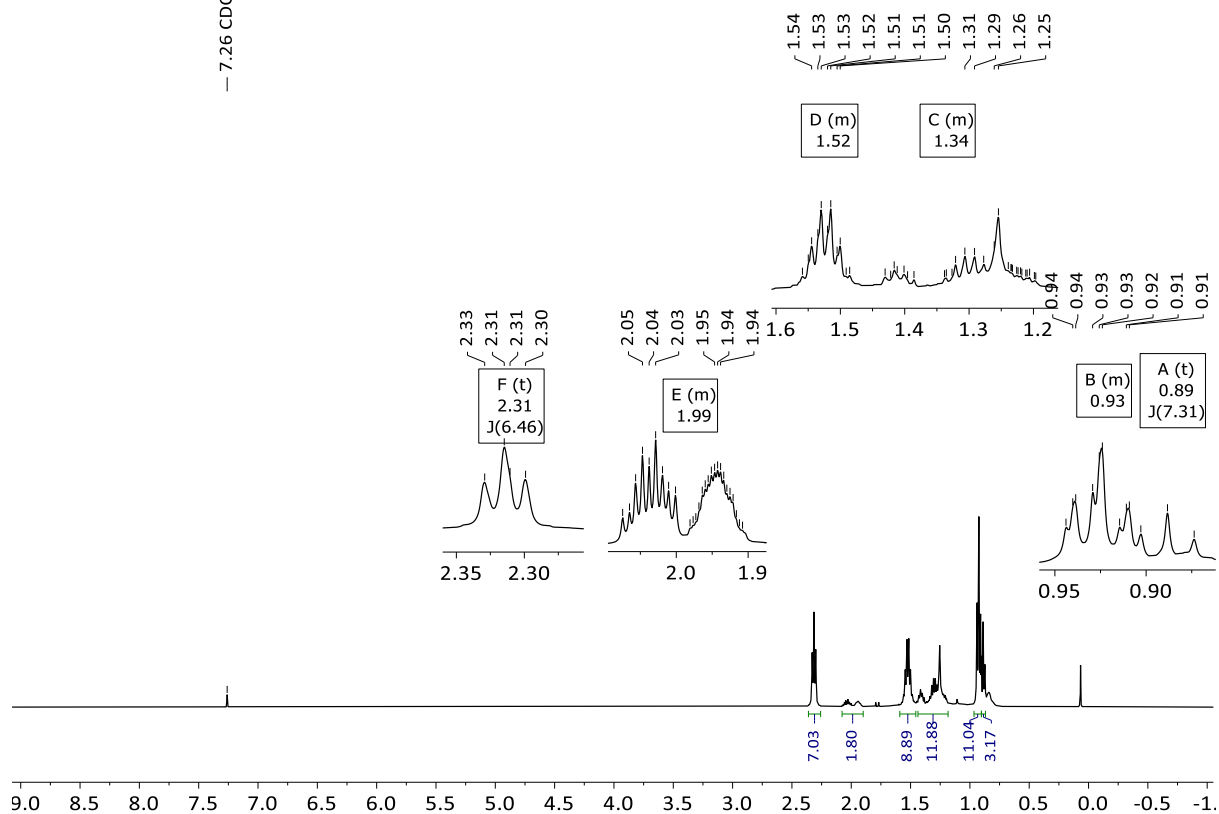

Figure S85: <sup>1</sup>H NMR spectrum of compound **11f** in CDCl<sub>3</sub>.

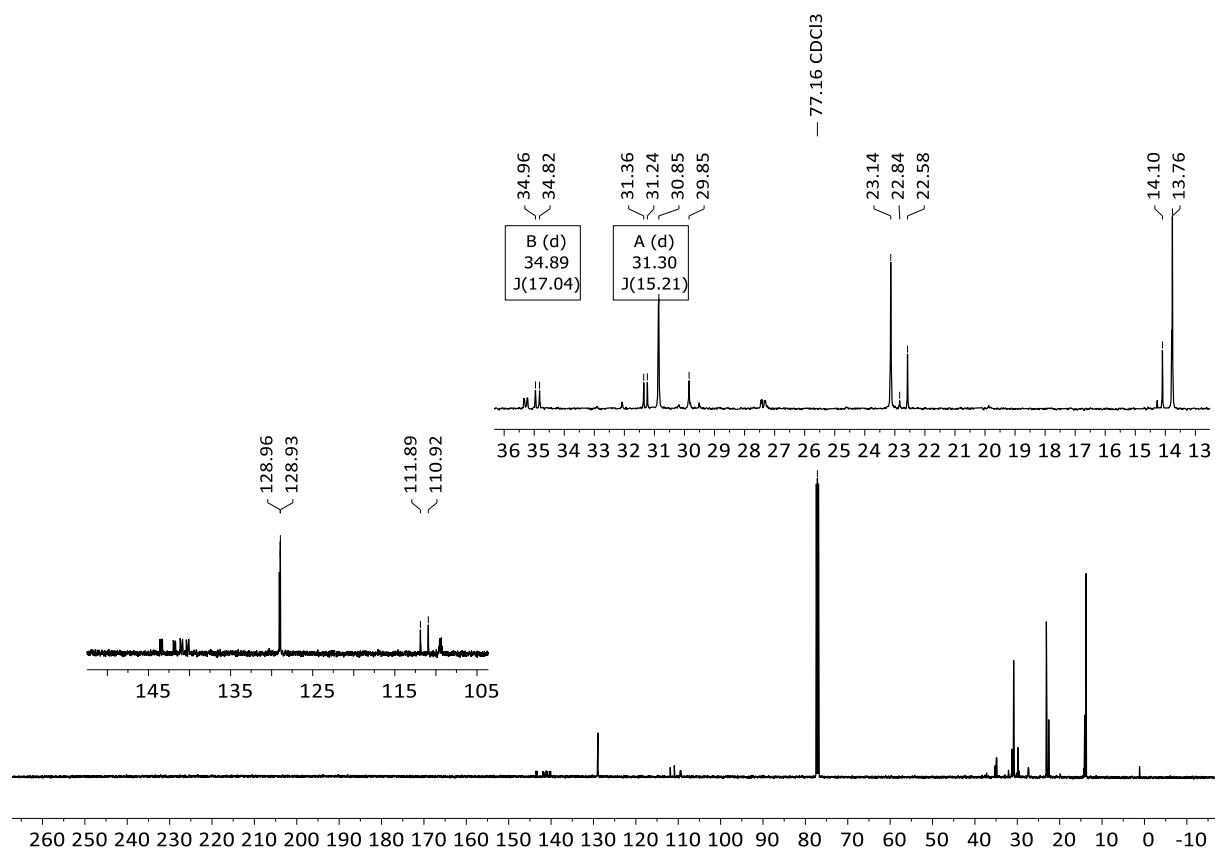

Figure S86: <sup>13</sup>C{<sup>1</sup>H} NMR spectrum of compound **11f** in CDCl<sub>3</sub>.

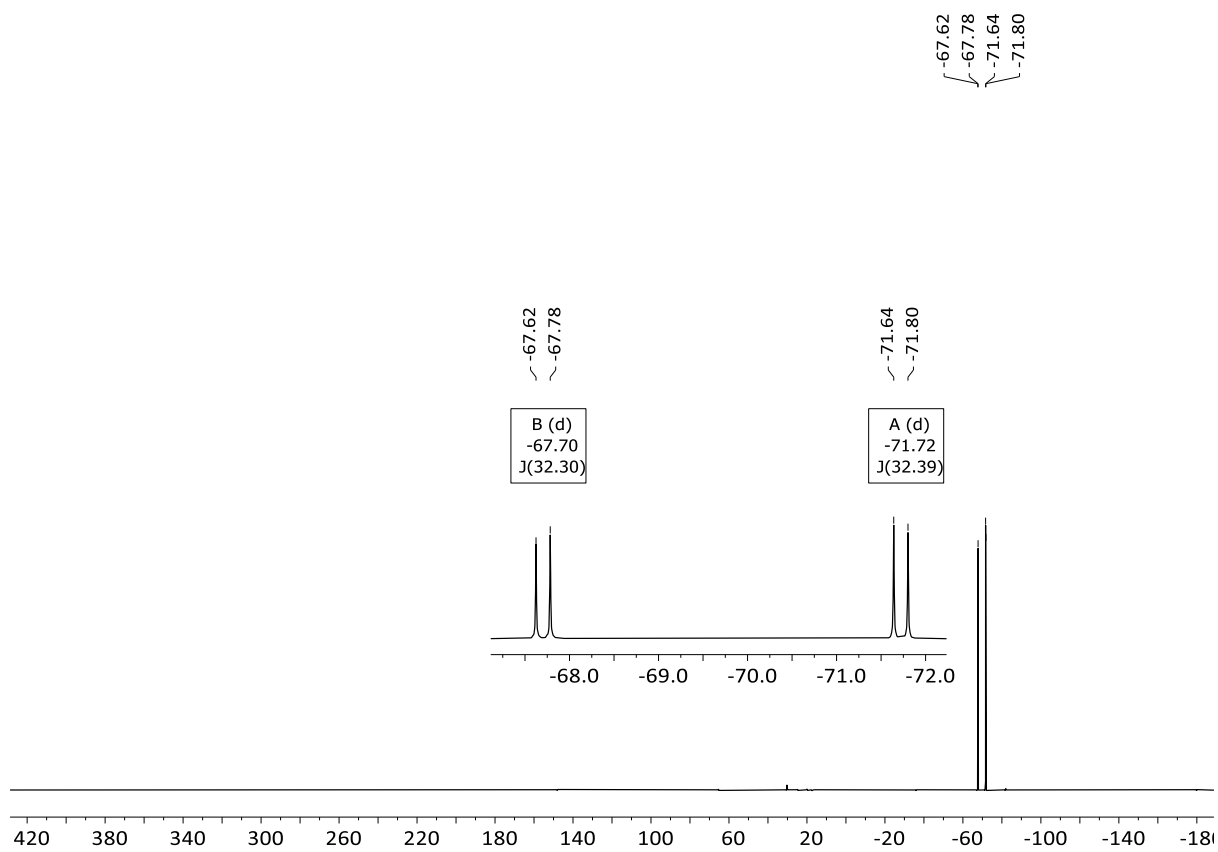

**Figure S87:**  $^{31}\text{P}\{^1\text{H}\}$  NMR spectrum of compound **11f** in  $\text{CDCl}_3$ .

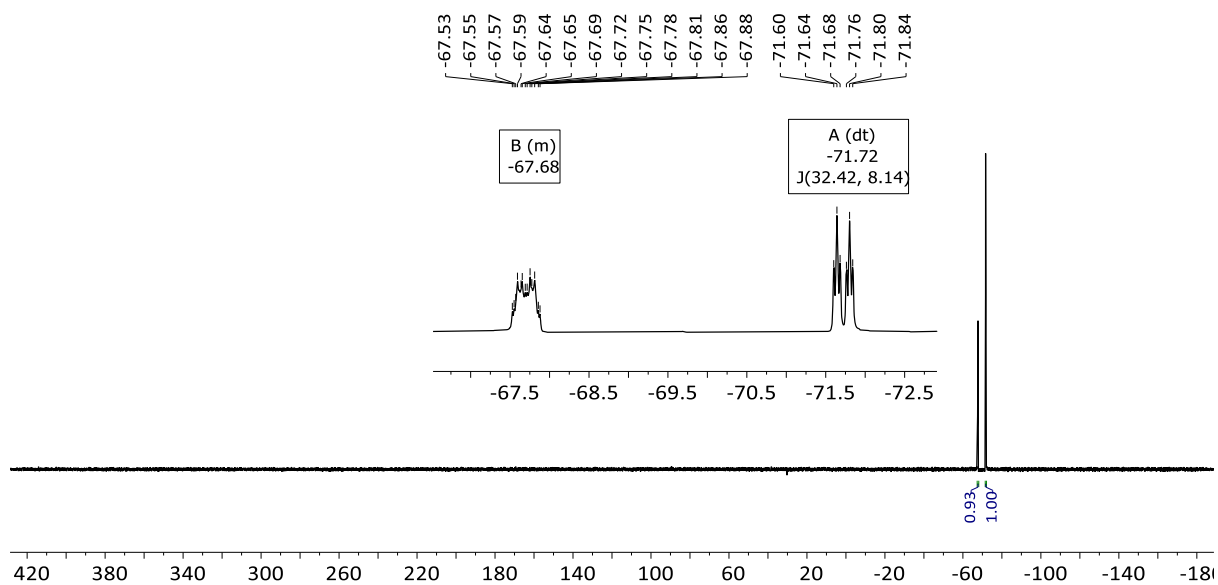

**Figure S88:**  $^{31}\text{P}$  NMR spectrum of compound **11f** in  $\text{CDCl}_3$ .

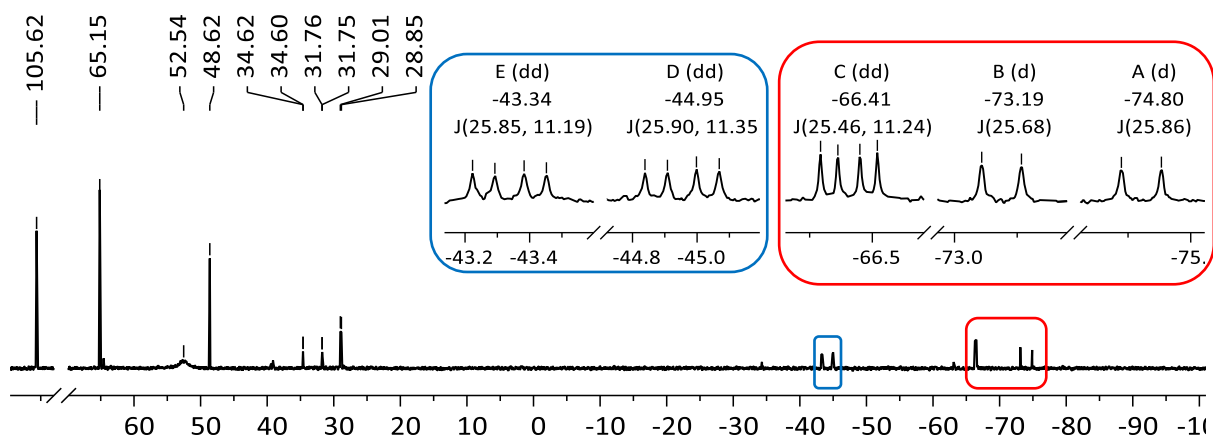

Figure S89.  $^{31}\text{P}\{^1\text{H}\}$  NMR spectrum of the reaction of **9f** with  $n\text{Bu}_3\text{P}$ .

## Cyclic voltammetry studies

Cyclic voltammograms (CVs) were measured under rigorous exclusion of the atmosphere by working in an argon-filled glove box. Voltammograms were obtained using a Pine Instruments, Inc., WaveNano potentiostat/galvanostat connected to platinum (Pt) or gold (Au) screen-printed electrodes on rugged ceramic substrates. The patterned electrodes formed an inner working disk and outer auxiliary ring separated by an Ag/AgCl spot (for further information, consult the website at <https://www.pineresearch.com/shop/products/electrodes/screen-printedelectrodes/ceramic/>). Experiments were controlled and data were processed using AfterMath software (<https://pineresearch.com/shop/kb/knowledge-category/downloads/>). The solvent dichloromethane was first distilled over CaH<sub>2</sub>, under Ar atmosphere and then collected into a Young-valve-Schlenk over P<sub>2</sub>O<sub>5</sub> and freeze-thaw degassed with 5 cycles of freezing and thawing, using a high vacuum source (8×10<sup>-3</sup> mbar). Pure solvent was then vacuum transferred to a second Young-valve-Schlenk of similar volume and taken directly into the glove box. All solution and sample preparations were undertaken within the same glove box. The commercial [<sup>n</sup>Bu<sub>4</sub>N]PF<sub>6</sub> was dried by heating for 24h at +80 °C in *vacuo* (8×10<sup>-3</sup> mbar) and used as electrolyte. After background scans were obtained, using electrolyte solutions (0.4 M solution in DCM), the analytes were added to make a 1 mM (in the cases of **3c,d**, **4c**, **5d** and **11f**) or 2mM (in the cases of **3e,f**, **4d-f**, **5e,f** and **6-8**) solutions (with ±50% accuracy). The starting potentials were determined from an open circuit potential (OCP) experiment and electrochemical samples were recorded with scan rates of 50–800 mVs<sup>-1</sup> at r.t. Cobaltocenium hexafluorophosphate was used as an internal reference to determine the potential, set to -1.350 V;<sup>10</sup> all reported potentials are corrected to the ferrocene/ferrocenium (Fc<sup>+0</sup>) redox couple set to 0 V.

For compounds with multi-stage redox properties, the nature of the cyclic voltammogram depends on  $\Delta E_m = (E_m^2 - E_m^1)$ , the reversibility and the number of transferred electrons in each step.<sup>11</sup> Calculated cyclic voltammograms for different values of  $\Delta E_m$  in a system with two one-electron steps were reported by Polcyn and Shain.<sup>12</sup> These calculations show when  $\Delta E_{1/2} \geq 180$  mV, two well-separated waves are observed, while for  $\Delta E_m$  between 0 and 100 mV, the individual waves are merged into a broad one. For  $\Delta E_m = 0$ , a single peak with a current between those of single-step one and two electrons transfer was found with  $E_p^a - E_p^c$



= 21 mV.<sup>12</sup> Considering this background, the redox behavior of compounds with two TTFs in their structure, depending on the degree of communication between two redox-active units can be divided into three main categories. i) If two TTF units have no interaction, i.e. oxidation of one TTF molecule does not affect the oxidation potential of the other TTF unit, the cyclic voltammogram shows only two redox waves, each representing a two-electron transfer process<sup>13</sup>; ii) For compounds with strong communication between TTF units, four separate one-electron transfer processes are expected<sup>14,15</sup>; iii) In weakly interacting systems, the separation between oxidation potentials are smaller and hence broad waves, sometimes with no clear separation, in cyclic voltammograms are expected. In these cases, it is also possible that the third and fourth oxidations occur in a single potential together with an enlarged current and narrow peak.<sup>16–18</sup>

For consistency in the conceptual presentation of data between the mono-TTF (**3,4**) and bis-TTF (**5-11**) species, the processes for the bis species are designated E1/E1' for the first electron removals from the (weakly interacting) TTF species, reflecting the closely spaced HOMO and HOMO-1 of the neutral molecules. Similarly, the second electron removals from the TTFs are indicated by E2/E2' to again emphasize the weak interactions between TTF moieties. In this notation, we differ from most of the other bis-TTF papers where E1 – E4 have routinely been employed. The latter, in our opinion, would only be helpful when a full delocalization is achieved, as was the goal but not the achievement of this work.

CVs were recorded at various scan rates (50, 100, 200, 400 and 800 mVs<sup>-1</sup>) and the plot of the anodic peak current versus the square root of the scan rates is depicted. The linear increase of the peak current with respect to the square root of the scan rate based on the Randles–Ševčík equation (Equation 1), indicating the redox processes are diffusion controlled as another proof of electrochemical reversibility.

$$I_p = 0.4463 \cdot A \cdot C \sqrt{\frac{n^3 F^3 D \nu}{RT}} \quad (\text{Equation 1})$$

Where  $I_p$  is the peak current,  $A$  is the surface of the electrode,  $C$  is the concentration of the analyte,  $n$  is the number of transferred electrons in the redox process,  $F$  is Faraday coefficient,  $D$  is the diffusion coefficient,  $\nu$  is the scan rate,  $R$  is the ideal rate constant and  $T$  is temperature.

## Cyclic voltammograms

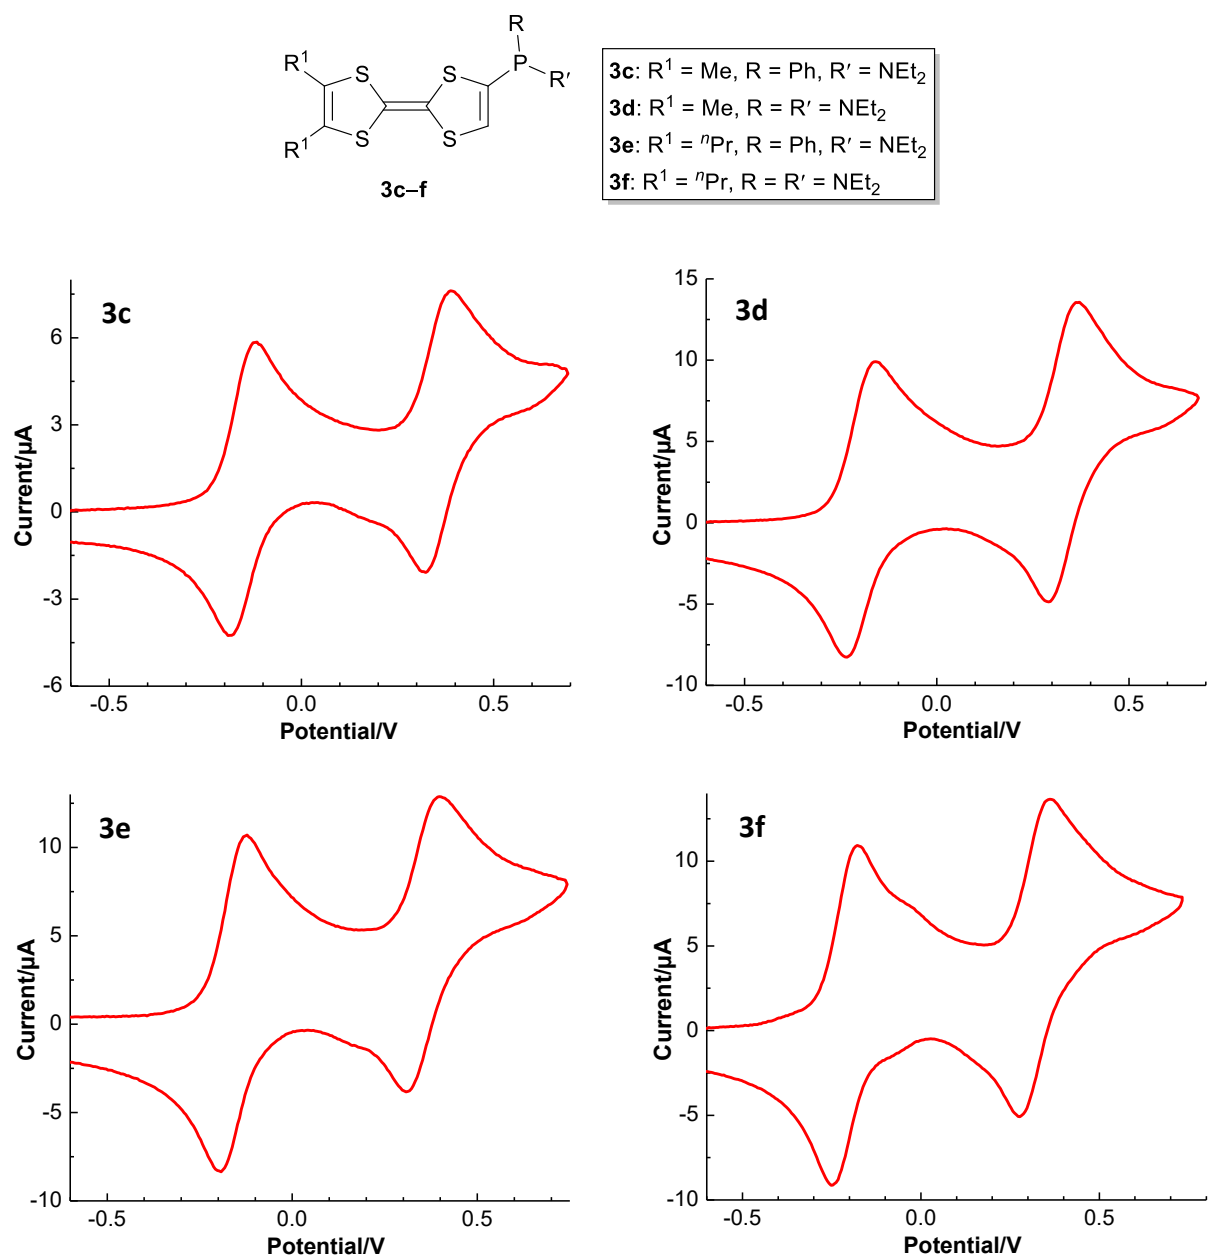

**Figure S90.** Cyclic voltammograms of **3c** (top left, 1 mM in DCM), **3d** (top right, 1 mM in DCM), **3e** (bottom left, 2 mM in DCM) and **3f** (bottom right, 2 mM in DCM) vs. Fc<sup>+0</sup> (0.4 M <sup>n</sup>Bu<sub>4</sub>PF<sub>6</sub> in DCM, 100 mVs<sup>-1</sup>).

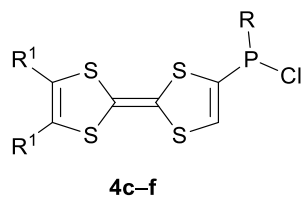

**4c:** R<sup>1</sup> = Me, R = Ph  
**4d:** R<sup>1</sup> = Me, R = NEt<sub>2</sub>  
**4e:** R<sup>1</sup> = <sup>n</sup>Pr, R = Ph  
**4f:** R<sup>1</sup> = <sup>n</sup>Pr, R = NEt<sub>2</sub>

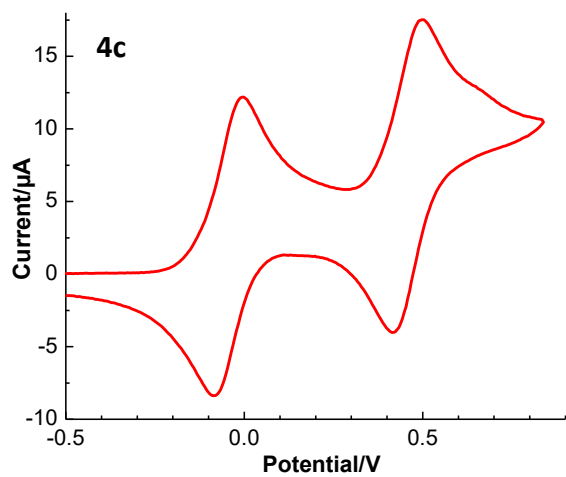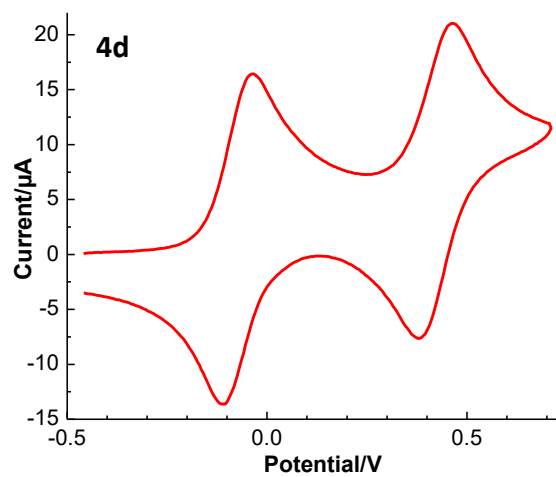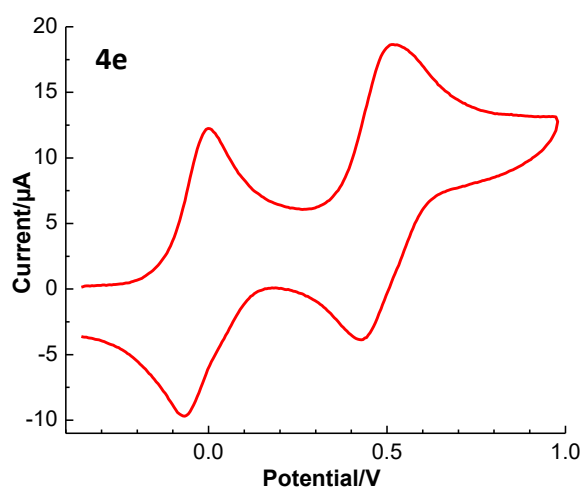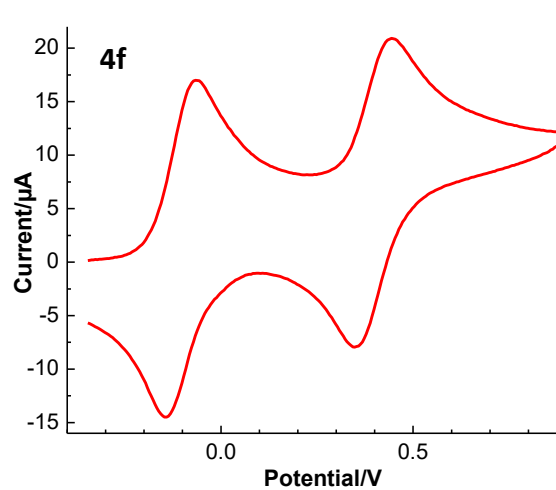

**Figure S91.** Cyclic voltammograms (oxidation processes) of **4c** (top left, 1 mM in DCM), **4d** (top right, 2 mM in DCM), **4e** (bottom left, 2 mM in DCM) and **4f** (bottom right, 2 mM in DCM) vs. Fc<sup>+0</sup> (0.4 M <sup>n</sup>Bu<sub>4</sub>PF<sub>6</sub> in DCM, 200 mVs<sup>-1</sup>).



**4c:** R<sup>1</sup> = Me, R = Ph  
**4d:** R<sup>1</sup> = Me, R = NEt<sub>2</sub>  
**4e:** R<sup>1</sup> = <sup>n</sup>Pr, R = Ph  
**4f:** R<sup>1</sup> = <sup>n</sup>Pr, R = NEt<sub>2</sub>

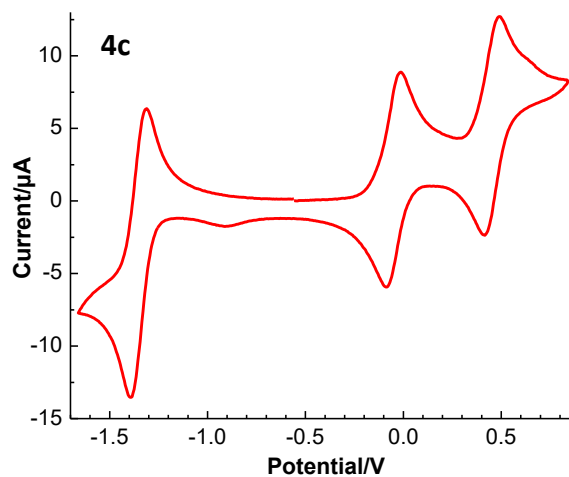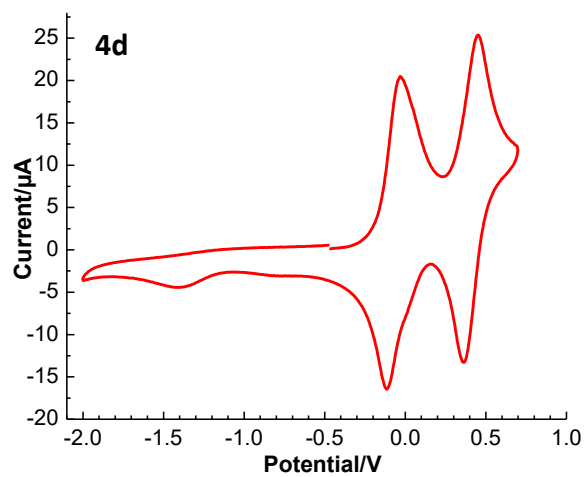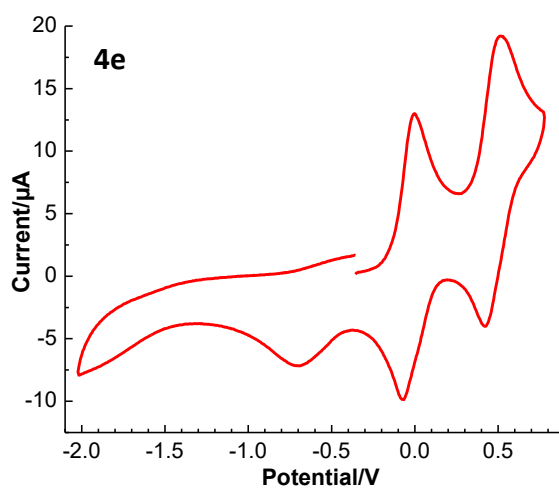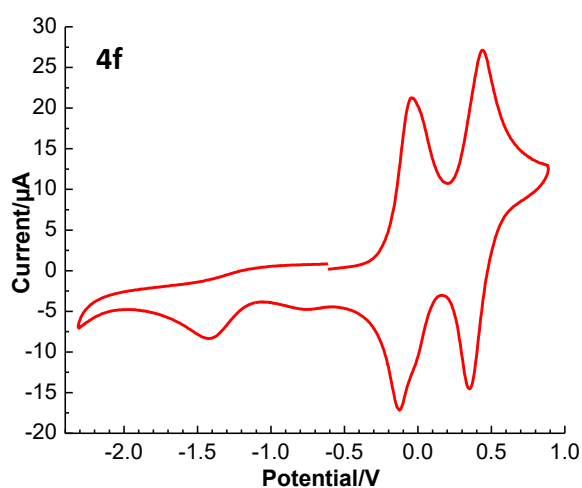

**Figure S92.** Cyclic voltammograms (wide range) of **4c** (top left), **4d** (top right), **4e** (bottom left) and **4f** (bottom right) vs. Fc<sup>+0</sup> (0.4 M <sup>n</sup>Bu<sub>4</sub>PF<sub>6</sub> and 2mM solutions of analytes in DCM, 200 mVs<sup>-1</sup>).

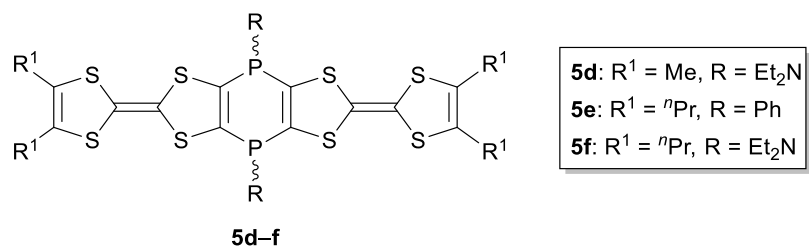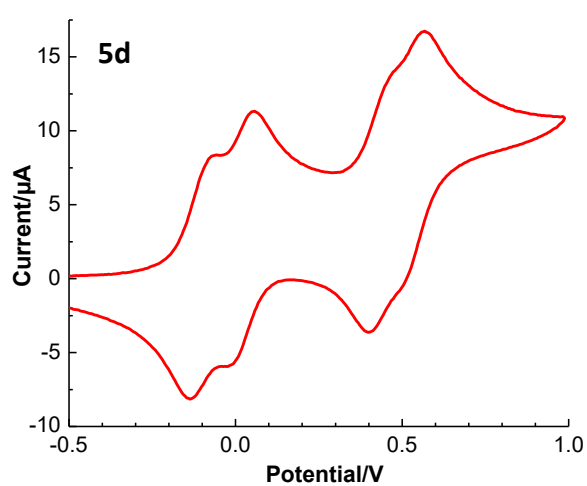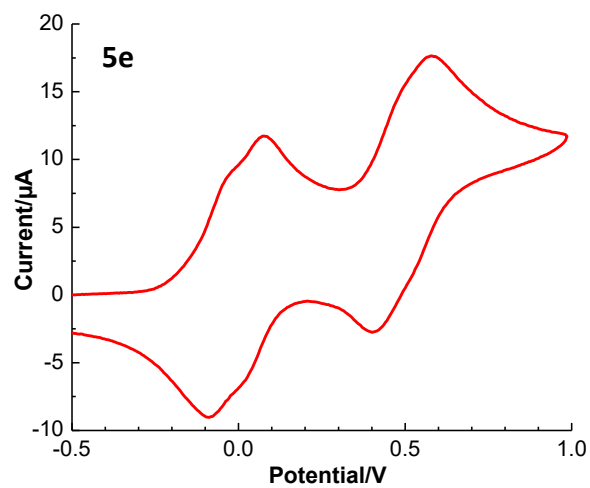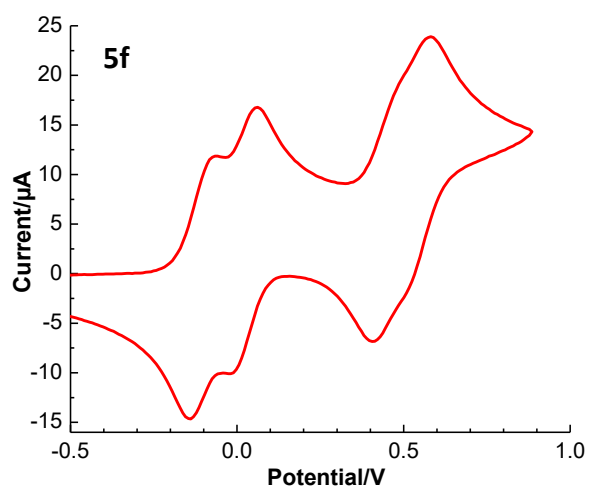

**Figure S93.** Cyclic voltammograms of **5d** (top left, 1 mM in DCM), **5e** (top right, 2 mM in DCM) and **5f** (bottom, 2 mM in DCM) vs. Fc<sup>+0</sup> (0.4 M <sup>n</sup>Bu<sub>4</sub>PF<sub>6</sub> in DCM, 100 mVs<sup>-1</sup>).

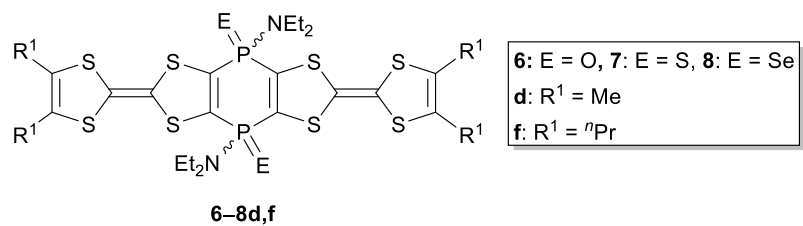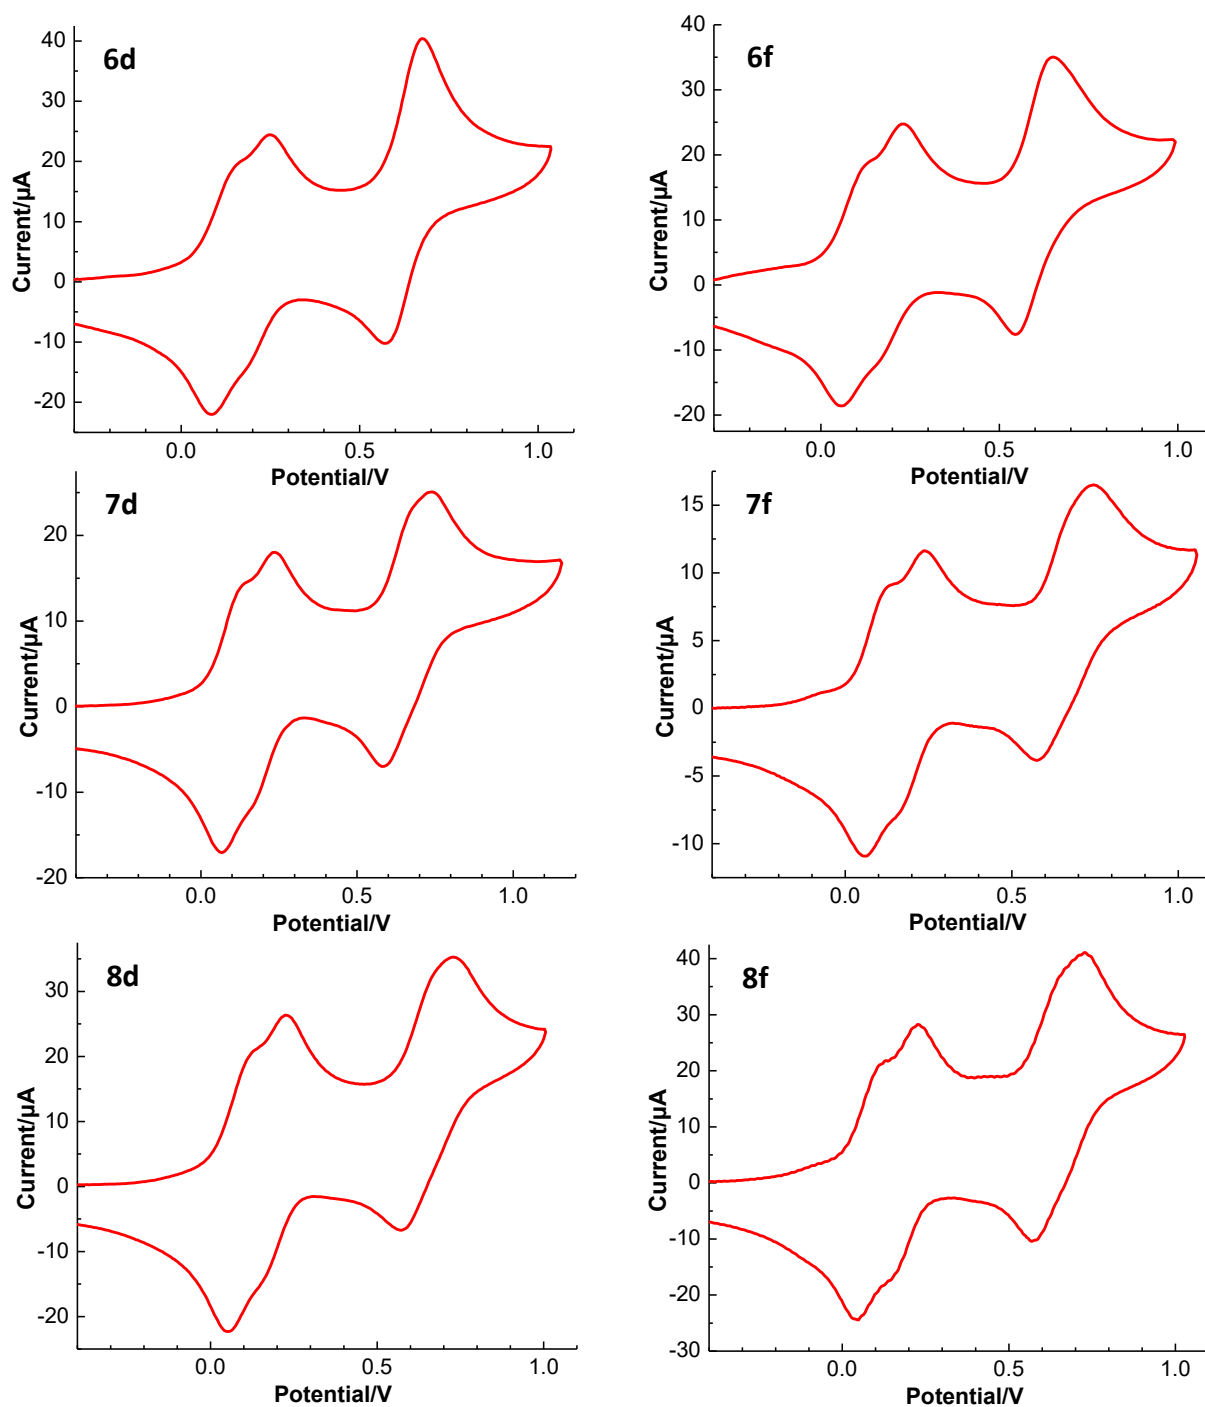

**Figure S94.** Cyclic voltammograms (oxidation) of **6d** (top left), **6f** (top right), **7d** (middle left), **7f** (middle right), **8d** (bottom left) and **8f** (bottom right) vs.  $\text{Fc}^{+/0}$  (0.4 M  $n\text{Bu}_4\text{PF}_6$  and 2mM solutions of analytes in DCM,  $200 \text{ mVs}^{-1}$ ).

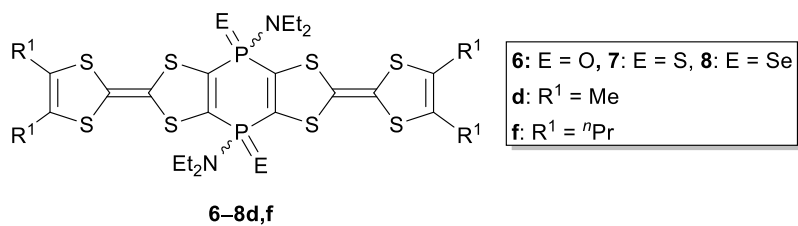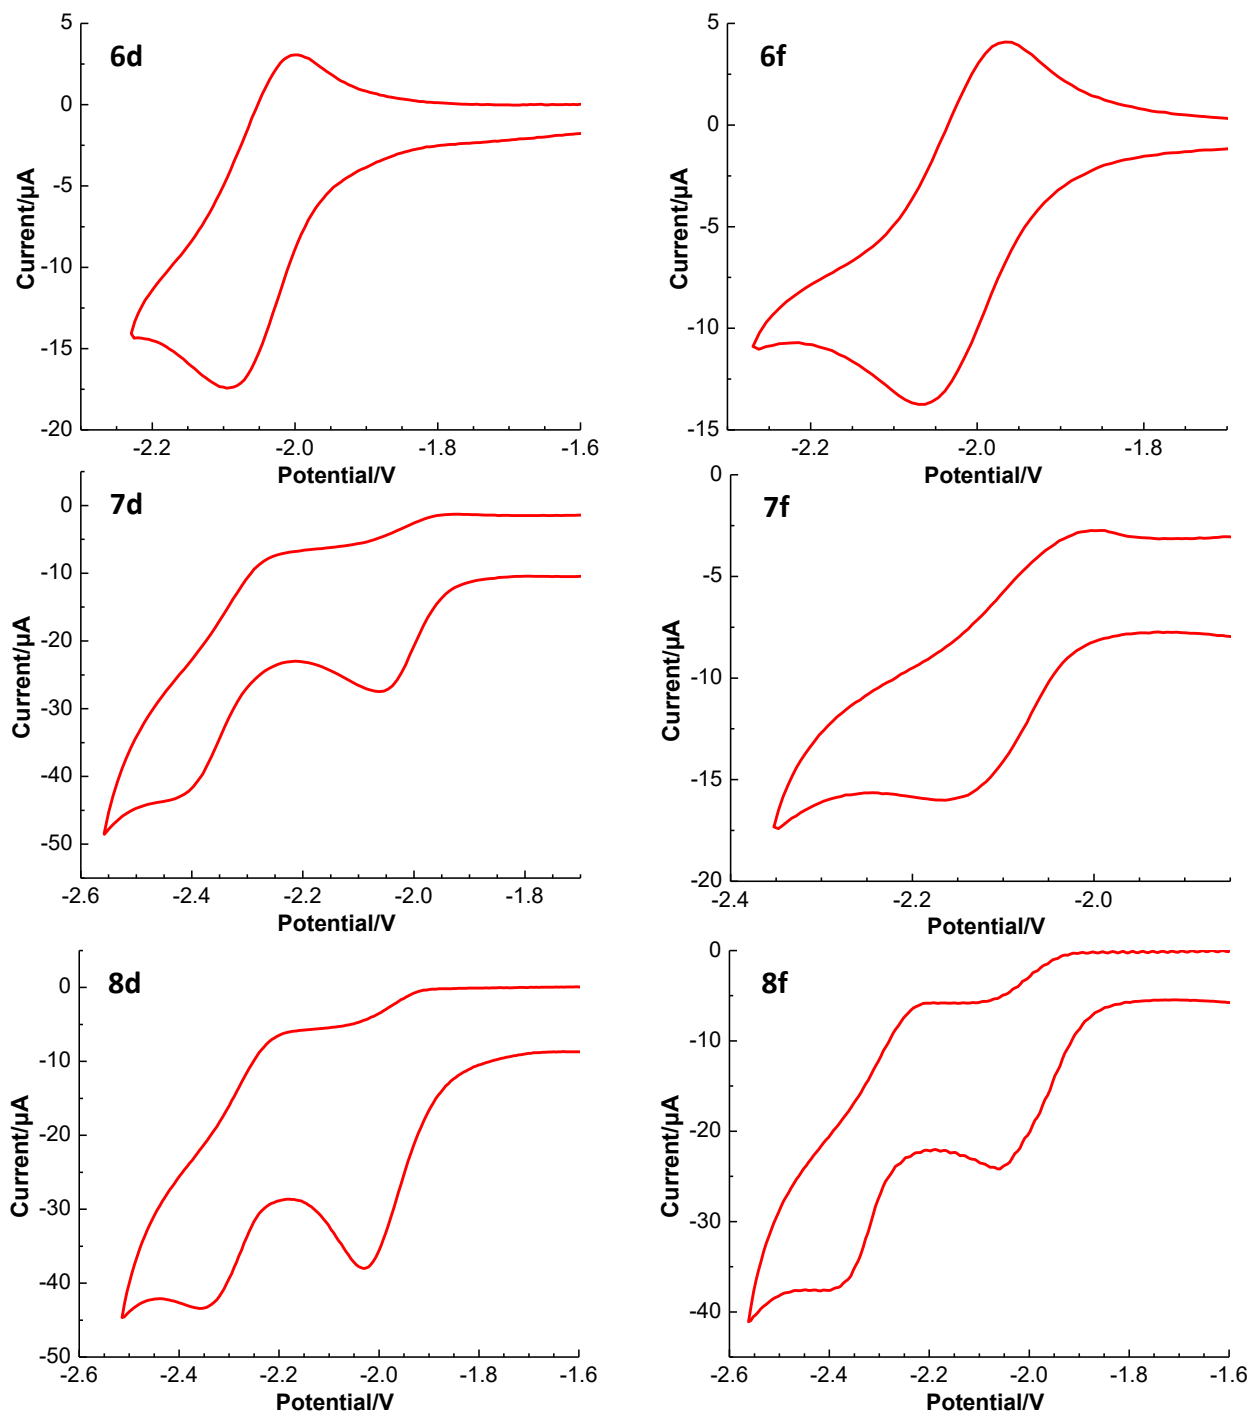

**Figure S95.** Cyclic voltammograms (reduction) of **6d** (top left), **6f** (top right), **7d** (middle left), **7f** (middle right), **8d** (bottom left) and **8f** (bottom right) vs.  $\text{Fc}^{+/0}$  (0.4 M  $n\text{Bu}_4\text{PF}_6$  and 2mM solutions of analytes in DCM,  $200 \text{ mVs}^{-1}$ ).

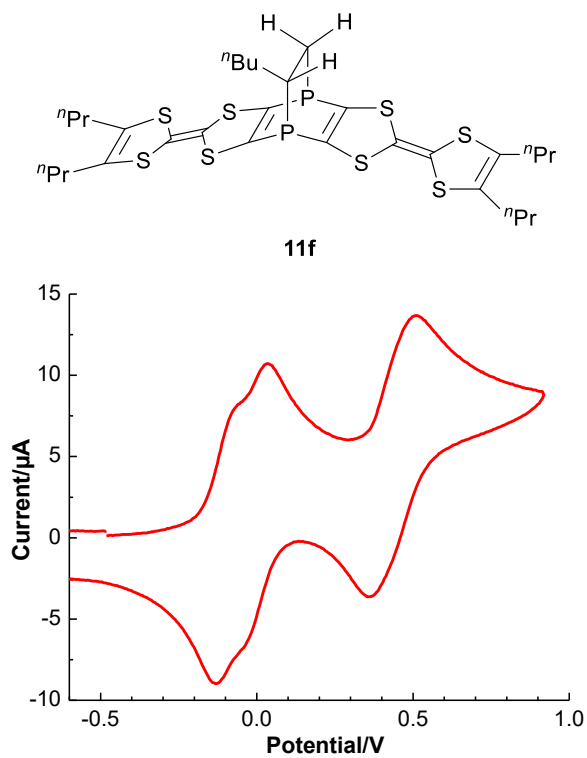

**Figure S96.** Cyclic voltammograms of **11f** (1 mM in DCM) vs.  $\text{Fc}^{+/0}$  (0.4 M  $n\text{Bu}_4\text{PF}_6$  in DCM,  $100 \text{ mVs}^{-1}$ ).

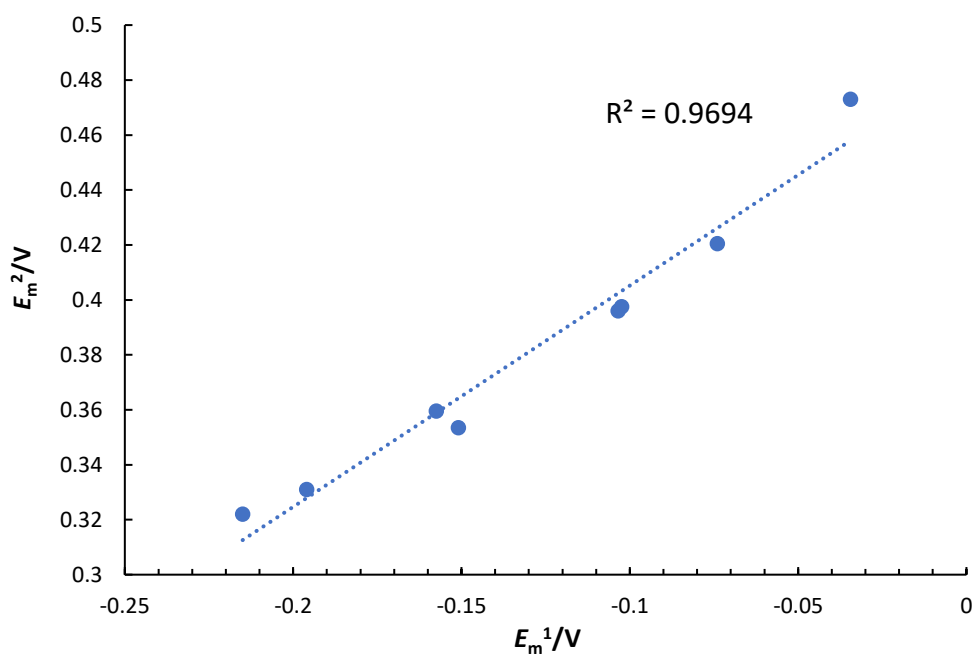

**Figure S97.** Correlation of all the substituent inductive effects in **3d–4f** on the first and second anodic mid-point potentials.



**Table S1.** Voltammetric data (potentials) for **3c–f** and **4c–f** (vs.  $\text{Fc}^{+/0}$ , 0.4 M  $n\text{Bu}_4\text{PF}_6$  in DCM, 200  $\text{mVs}^{-1}$ ).

| Compound  | $E_p^{a1}/\text{V}$ | $E_p^{c1}/\text{V}$ | $E_{1/2}^1/\text{V}$ | $\Delta E_p^1/\text{mV}$ | $E_p^{a2}/\text{V}$ | $E_p^{c2}/\text{V}$ | $E_{1/2}^2/\text{V}$ | $\Delta E_p^2/\text{mV}$ | $\Delta E_{1/2}^{1,2}/\text{mV}$ |
|-----------|---------------------|---------------------|----------------------|--------------------------|---------------------|---------------------|----------------------|--------------------------|----------------------------------|
| <b>3c</b> | -0.115              | -0.187              | -0.151               | 72                       | 0.389               | 0.318               | 0.354                | 71                       | 505                              |
| <b>3d</b> | -0.158              | -0.234              | -0.196               | 76                       | 0.371               | 0.291               | 0.331                | 80                       | 527                              |
| <b>3e</b> | -0.120              | -0.195              | -0.158               | 75                       | 0.409               | 0.310               | 0.360                | 99                       | 517                              |
| <b>3f</b> | -0.180              | -0.250              | -0.215               | 70                       | 0.369               | 0.275               | 0.322                | 94                       | 537                              |
| <b>4c</b> | -0.062              | -0.143              | -0.103               | 81                       | 0.438               | 0.357               | 0.398                | 81                       | 500                              |
| <b>4d</b> | -0.034              | -0.114              | -0.074               | 80                       | 0.461               | 0.380               | 0.421                | 81                       | 495                              |
| <b>4e</b> | -0.002              | -0.067              | -0.035               | 65                       | 0.518               | 0.428               | 0.473                | 90                       | 508                              |
| <b>4f</b> | -0.066              | -0.141              | -0.104               | 75                       | 0.444               | 0.348               | 0.396                | 96                       | 500                              |

$E_p^a$ : Oxidation peak potentials;  $E_p^c$ : Reduction peak potentials;  $E_m$ : The mid-point of the oxidation and reduction peak potentials;  $I_p^a$ : Oxidation current;  $I_p^c$ : Reduction current;  $\Delta E_p^{(a-c)}$ : Difference between oxidation and reduction potentials;  $\Delta E_m$ : Difference between mid-point potentials.

**Table S2.** Voltammetric data (currents) for **3c–f** and **4c–f** (0.4 M  $n\text{Bu}_4\text{PF}_6$  in DCM, 200  $\text{mVs}^{-1}$ ).

| Compound  | $I_p^{a1}/\mu\text{A}$ | $I_p^{c1}/\mu\text{A}$ | $I_p^{a1}/\mu\text{A}$<br>corr.* | $I_p^{c1}/\mu\text{A}$<br>corr.* | $I_p^{c1}/I_p^{a1}$ | $I_p^{c1}/I_p^{a1}$<br>corr. | $I_p^{a2}/\mu\text{A}$ | $I_p^{c2}/\mu\text{A}$ | $I_p^{a2}/\mu\text{A}$<br>corr.* | $I_p^{c2}/\mu\text{A}$<br>corr.* | $I_p^{c2}/I_p^{a2}$ | $I_p^{c2}/I_p^{a2}$<br>corr. |
|-----------|------------------------|------------------------|----------------------------------|----------------------------------|---------------------|------------------------------|------------------------|------------------------|----------------------------------|----------------------------------|---------------------|------------------------------|
| <b>3c</b> | 7.346                  | 6.034                  | 4.7                              | 4.7                              | 0.82                | 1.00                         | 9.718                  | 3.218                  | 4.6                              | 4.55                             | 0.33                | 0.99                         |
| <b>3d</b> | 11.37                  | 11.9                   | 7.6                              | 7.6                              | 1.05                | 1.00                         | 16.75                  | 7.584                  | 8                                | 8                                | 0.45                | 1.00                         |
| <b>3e</b> | 13.15                  | 11.23                  | 8                                | 8                                | 0.85                | 1.00                         | 16.2                   | 5.244                  | 7.2                              | 7.5                              | 0.32                | 1.04                         |
| <b>3f</b> | 12.76                  | 12.69                  | 9.5                              | 10.5                             | 0.99                | 1.11                         | 16.8                   | 7.541                  | 8                                | 8                                | 0.45                | 1.00                         |
| <b>4c</b> | 9.46                   | 8.882                  | 10                               | 9.8                              | 0.94                | 0.98                         | 14.42                  | 4.778                  | 10.2                             | 10                               | 0.33                | 0.98                         |
| <b>4d</b> | 16.44                  | 13.63                  | 13                               | 13                               | 0.83                | 1.00                         | 21.03                  | 7.648                  | 13                               | 13                               | 0.36                | 1.00                         |
| <b>4e</b> | 12.24                  | 9.699                  | 12                               | 12                               | 0.79                | 1.00                         | 18.65                  | 3.867                  | 12.5                             | 10                               | 0.21                | 0.80                         |
| <b>4f</b> | 17.01                  | 14.49                  | 15                               | 15                               | 0.85                | 1.00                         | 20.92                  | 7.939                  | 15                               | 13                               | 0.38                | 0.87                         |

\* To obtain the corrected values for currents, the anodic currents of the second processes were corrected back to the first anodic values, which enables to find the true zero and cathodic currents of the second peaks.

$E_p^a$ : Oxidation peak potentials;  $E_p^c$ : Reduction peak potentials;  $E_m$ : The mid-point of the oxidation and reduction peak potentials;  $I_p^a$ : Oxidation current;  $I_p^c$ : Reduction current;  $\Delta E_p^{(a-c)}$ : Difference between oxidation and reduction potentials;  $\Delta E_m$ : Difference between mid-point potentials.

**Table S3.** Voltammetric data (potentials) for **5–8** and **11f** (vs.  $\text{Fc}^{+/0}$ , 0.4 M  $n\text{-Bu}_4\text{PF}_6$  in DCM, 100  $\text{mVs}^{-1}$ ).

| Compound   | $E_p^{a1}/\text{V}$ | $E_p^{c1}/\text{V}$ | $\Delta E_p^1/\text{mV}$ | $E_p^{a1'}/\text{V}$ | $E_p^{c1'}/\text{V}$ | $\Delta E_p^{1'}/\text{mV}$ | $\Delta E_{1/2}^{1,1'}/\text{mV}$ | $E_p^{a2}/\text{V}$ | $E_p^{c2}/\text{V}$ | $\Delta E_p^2/\text{mV}$ | $E_p^{a2'}/\text{V}$ | $E_p^{c2'}/\text{V}$ | $\Delta E_p^{2'}/\text{mV}$ | $\Delta E_{1/2}^{2,2'}/\text{mV}$ |
|------------|---------------------|---------------------|--------------------------|----------------------|----------------------|-----------------------------|-----------------------------------|---------------------|---------------------|--------------------------|----------------------|----------------------|-----------------------------|-----------------------------------|
| <b>5d</b>  | -0.057              | -0.137              | 80                       | 0.053                | -0.022               | 75                          | 112                               | 0.458               | 0.398               | 60                       | 0.568                | 0.503                | 65                          | 107                               |
| <b>5e</b>  | -0.028              | -0.088              | 60                       | 0.077                | 0.016                | 61                          | 104                               | 0.466               | 0.401               | 65                       | 0.581                | 0.516                | 65                          | 115                               |
| <b>5f</b>  | -0.066              | -0.139              | 73                       | 0.062                | -0.019               | 81                          | 124                               | 0.477               | 0.405               | 72                       | 0.581                | 0.509                | 72                          | 104                               |
| <b>6d</b>  | 0.154               | 0.081               | 73                       | 0.249                | 0.181                | 68                          | 97                                | 0.674               | 0.571               | 103                      | —                    | —                    | —                           | —                                 |
| <b>6f</b>  | 0.130               | 0.057               | 73                       | 0.226                | 0.153                | 73                          | 96                                | 0.650               | 0.545               | 105                      | —                    | —                    | —                           | —                                 |
| <b>7d</b>  | 0.141               | 0.068               | 73                       | 0.237                | 0.164                | 73                          | 96                                | 0.742               | 0.579               | 163                      | —                    | —                    | —                           | —                                 |
| <b>7f</b>  | 0.141               | 0.060               | 81                       | 0.236                | 0.155                | 81                          | 95                                | 0.746               | 0.575               | 171                      | —                    | —                    | —                           | —                                 |
| <b>8d</b>  | 0.133               | 0.051               | 82                       | 0.228                | 0.151                | 77                          | 97                                | 0.728               | 0.571               | 157                      | —                    | —                    | —                           | —                                 |
| <b>8f</b>  | 0.126               | 0.048               | 78                       | 0.232                | 0.153                | 79                          | 105                               | 0.732               | 0.587               | 145                      | —                    | —                    | —                           | —                                 |
| <b>11f</b> | -0.061              | -0.132              | 71                       | 0.034                | -0.036               | 70                          | 95                                | 0.514               | 0.353               | 161                      | —                    | —                    | —                           | —                                 |

$E_p^a$ : Oxidation peak potentials;  $E_p^c$ : Reduction peak potentials;  $E_m$ : The mid-point of the oxidation and reduction peak potentials;  $I_p^a$ : Oxidation current;  $I_p^c$ : Reduction current;  $\Delta E_p^{(a-c)}$ : Difference between oxidation and reduction potentials;  $\Delta E_m$ : Difference between mid-point potentials.

**Table S4.** Voltammetric data (currents) for **5–8** and **11f** (0.4 M <sup>n</sup>Bu<sub>4</sub>PF<sub>6</sub> in DCM, 100 mVs<sup>-1</sup>).

| Compound   | $I_p^{a1}/\mu\text{A}$ | $I_p^{c1}/\mu\text{A}$ | $I_p^{c1}/I_p^{a1}$ | $I_p^{a1'}/\mu\text{A}$<br>(corr.)* | $I_p^{c1'}/\mu\text{A}$<br>(corr.)* | $I_p^{c1'}/I_p^{a1'}$<br>corr. | $I_p^{a2}/\mu\text{A}$<br>(corr.)* | $I_p^{c2}/\mu\text{A}$<br>(corr.)* | $I_p^{c2}/I_p^{a2}$<br>corr. | $I_p^{a2'}/\mu\text{A}$<br>(corr.)* | $I_p^{c2'}/\mu\text{A}$<br>(corr.)* | $I_p^{c2'}/I_p^{a2'}$<br>corr. |
|------------|------------------------|------------------------|---------------------|-------------------------------------|-------------------------------------|--------------------------------|------------------------------------|------------------------------------|------------------------------|-------------------------------------|-------------------------------------|--------------------------------|
| <b>5d</b>  | 8.376                  | 8.157                  | 0.97                | 11.320<br>(8.376)                   | 5.928<br>(8.872)                    | 0.97                           | 13.440<br>(8.376)                  | 3.632<br>(8.696)                   | 0.97                         | 16.750<br>(8.376)                   | 0.477<br>(8.851)                    | 0.97                           |
| <b>5e</b>  | 8.869                  | 9.028                  | 1.02                | 11.730<br>(8.869)                   | 6.409<br>(9.270)                    | 1.02                           | 13.870<br>(8.869)                  | 2.753<br>(7.754)                   | 1.02                         | 17.64<br>(8.869)                    | 1.167<br>(9.938)                    | 1.02                           |
| <b>5f</b>  | 11.860                 | 14.650                 | 1.24                | 16.790<br>(11.860)                  | 10.090<br>(15.020)                  | 1.24                           | 18.510<br>(11.860)                 | 6.831<br>(13.481)                  | 1.24                         | 23.900<br>(11.860)                  | 1.944<br>(13.984)                   | 1.24                           |
| <b>6d</b>  | 19.400                 | 21.990                 | 1.13                | 24.450<br>(19.400)                  | 14.570<br>(19.620)                  | 1.13                           | 40.400<br>(19.400)                 | 10.230<br>(31.230)                 | 1.13                         | —                                   | —                                   | —                              |
| <b>6f</b>  | 18.720                 | 18.620                 | 0.99                | 24.760<br>(18.720)                  | 12.480<br>(18.520)                  | 0.99                           | 35.050<br>(18.720)                 | 7.623<br>(23.953)                  | 0.99                         | —                                   | —                                   | —                              |
| <b>7d</b>  | 14.420                 | 17.060                 | 1.18                | 18.040<br>(14.420)                  | 11.790<br>(15.410)                  | 1.18                           | 25.080<br>(14.420)                 | 6.999<br>(17.659)                  | 1.18                         | —                                   | —                                   | —                              |
| <b>7f</b>  | 9.123                  | 10.920                 | 1.20                | 11.640<br>(9.123)                   | 7.936<br>(10.453)                   | 1.20                           | 16.500<br>(9.123)                  | 3.847<br>(11.224)                  | 1.20                         | —                                   | —                                   | —                              |
| <b>8d</b>  | 20.960                 | 22.320                 | 1.06                | 26.350<br>(20.960)                  | 15.040<br>(20.430)                  | 1.06                           | 35.280<br>(20.960)                 | 6.723<br>(21.043)                  | 1.06                         | —                                   | —                                   | —                              |
| <b>8f</b>  | 19.980                 | 23.070                 | 1.15                | 26.920<br>(19.980)                  | 16.320<br>(23.260)                  | 1.15                           | 39.010<br>(19.980)                 | 10.530<br>(29.560)                 | 1.15                         | —                                   | —                                   | —                              |
| <b>11f</b> | 8.199                  | 8.979                  | 1.10                | 10.720<br>(8.199)                   | 6.595<br>(9.116)                    | 1.10                           | 13.680<br>(8.199)                  | 3.631<br>(9.112)                   | 1.10                         | —                                   | —                                   | —                              |

\* To obtain the corrected values for currents, the anodic currents of the second, third and fourth processes were corrected back to the first anodic values, which enables to find the true zero and cathodic currents of the remaining peaks.

$E_p^a$ : Oxidation peak potentials;  $E_p^c$ : Reduction peak potentials;  $I_p^a$ : Oxidation current;  $I_p^c$ : Reduction current;  $\Delta E_p^{(a-c)}$ : Difference between oxidation and reduction peak potentials.

**Table S5.** Voltammetric data (potentials and currents) for reduction processes of compounds **4d–f** and **6–8** (vs.  $\text{Fc}^{+/0}$ , 0.4 M  $n\text{Bu}_4\text{PF}_6$  in DCM, 200  $\text{mVs}^{-1}$ ).

| Compound  | $E_p^{c3}/\text{V}$ | $I_p^{c3}/\mu\text{A}$ | $E_p^{a3}/\text{V}$ | $I_p^{a3}/\mu\text{A}$ | $E_p^{c4}/\text{V}$ | $I_p^{c4}/\mu\text{A}$ | $E_p^{a4}/\text{V}$ | $I_p^{a4}/\mu\text{A}$ |
|-----------|---------------------|------------------------|---------------------|------------------------|---------------------|------------------------|---------------------|------------------------|
| <b>4d</b> | -0.78               | 2.00                   | —                   | —                      | -1.402              | 4.44                   | —                   | —                      |
| <b>4e</b> | -0.71               | 7.18                   | —                   | —                      | —                   | —                      | —                   | —                      |
| <b>4f</b> | -0.75               | 4.77                   | —                   | —                      | -1.423              | 8.36                   | —                   | —                      |
| <b>6d</b> | -2.10               | 17.43                  | -2.001              | 3.07                   | -2.36               | 15.30                  | —                   | —                      |
| <b>6f</b> | -2.06               | 13.75                  | -1.967              | 6.5                    | —                   | —                      | —                   | —                      |
| <b>7d</b> | -2.06               | 27.46                  | -1.919              | 1.28                   | -2.405              | 42.15                  | —                   | —                      |
| <b>7f</b> | -2.14               | 27.12                  | -2.026              | 10.70                  | —                   | —                      | —                   | —                      |
| <b>8d</b> | -2.03               | 38.00                  | -1.915              | 0.44                   | -2.360              | 43.42                  | —                   | —                      |
| <b>8f</b> | -2.06               | 24.20                  | -1.938              | 0.69                   | -2.417              | 37.67                  | —                   | —                      |

$E_p^a$ : Oxidation peak potentials;  $E_p^c$ : Reduction peak potentials;  $I_p^a$ : Oxidation current;  $I_p^c$ : Reduction current;  $\Delta E_p^{(a-c)}$ : Difference between oxidation and reduction peak potentials;  $\Delta E_m$ : Difference between mid-point potentials.

## Scan rate dependency studies

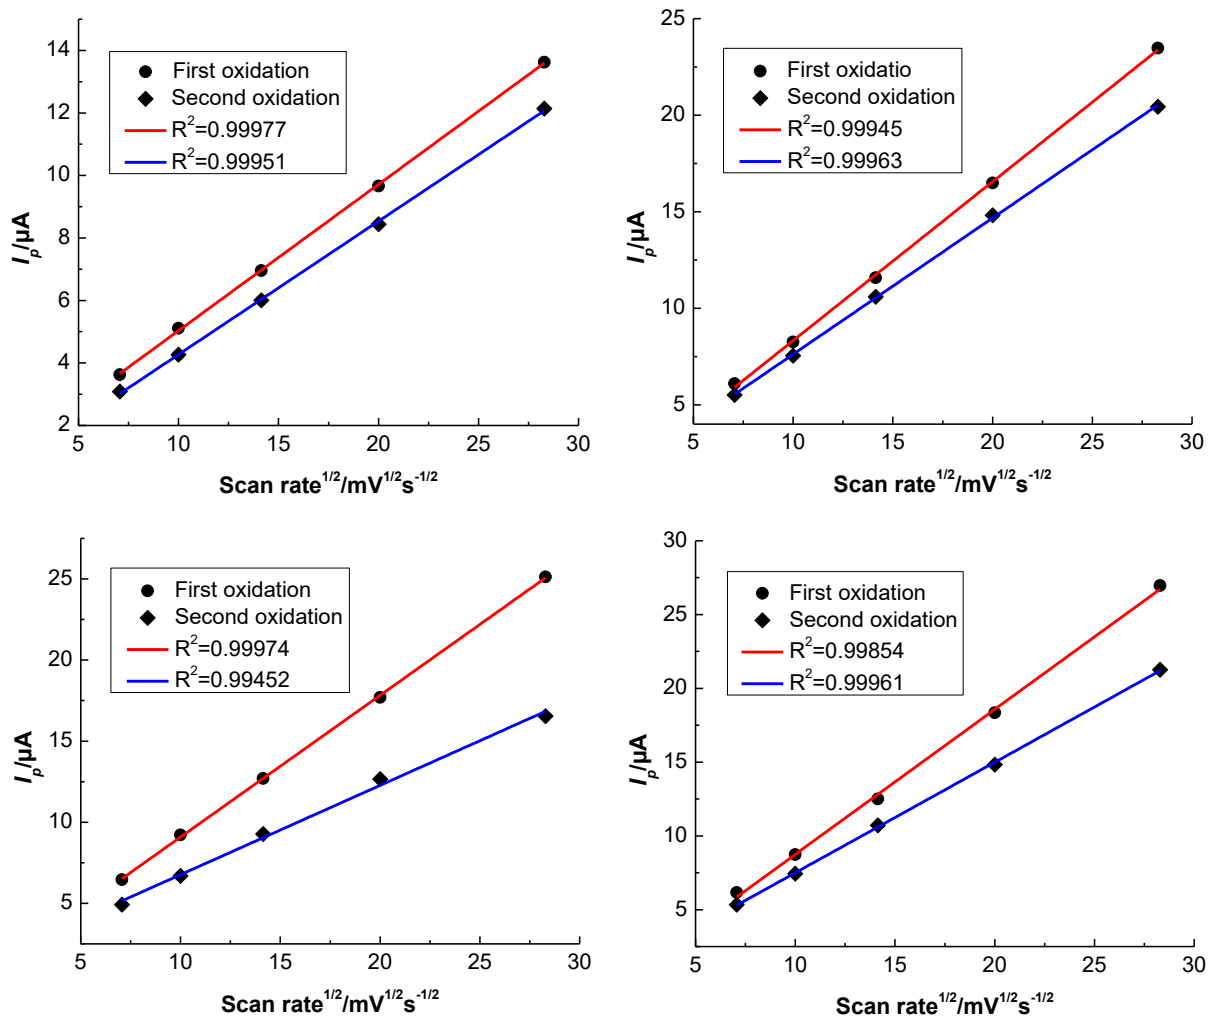

**Figure S98.** Dependency of the anodic peak currents on the scan rate for **3c** (top left), **3d** (top right), **3e** (bottom left) and **3f** (bottom right).

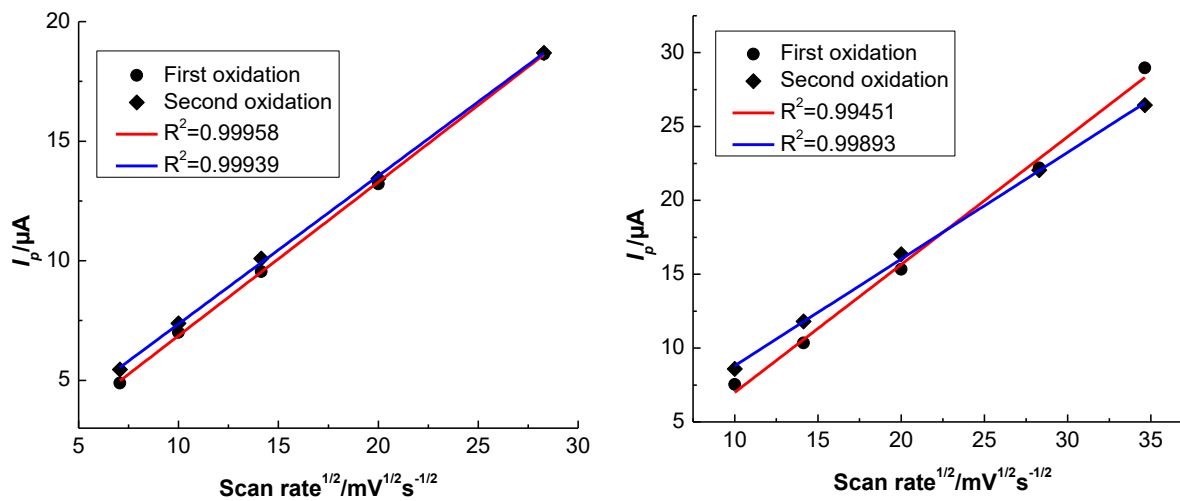

**Figure S99.** Dependency of the anodic peak currents on the scan rate for **4c** (left) and **4e** (right).

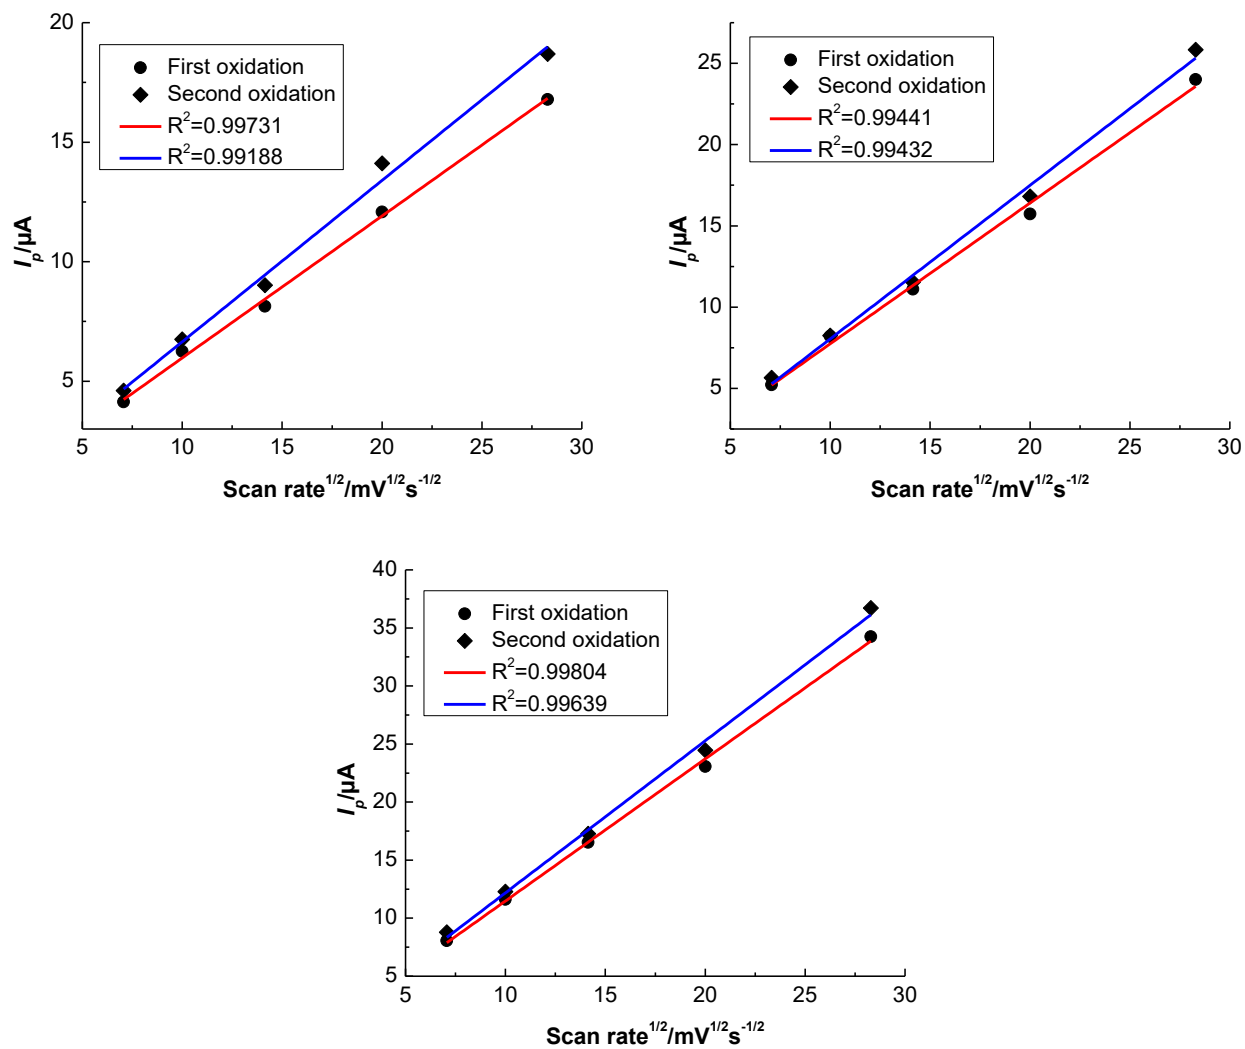

**Figure S100.** Dependency of the anodic peak currents (first and second redox processes) on the scan rate for **5d** (top left), **5e** (top right) and **5f** (bottom).

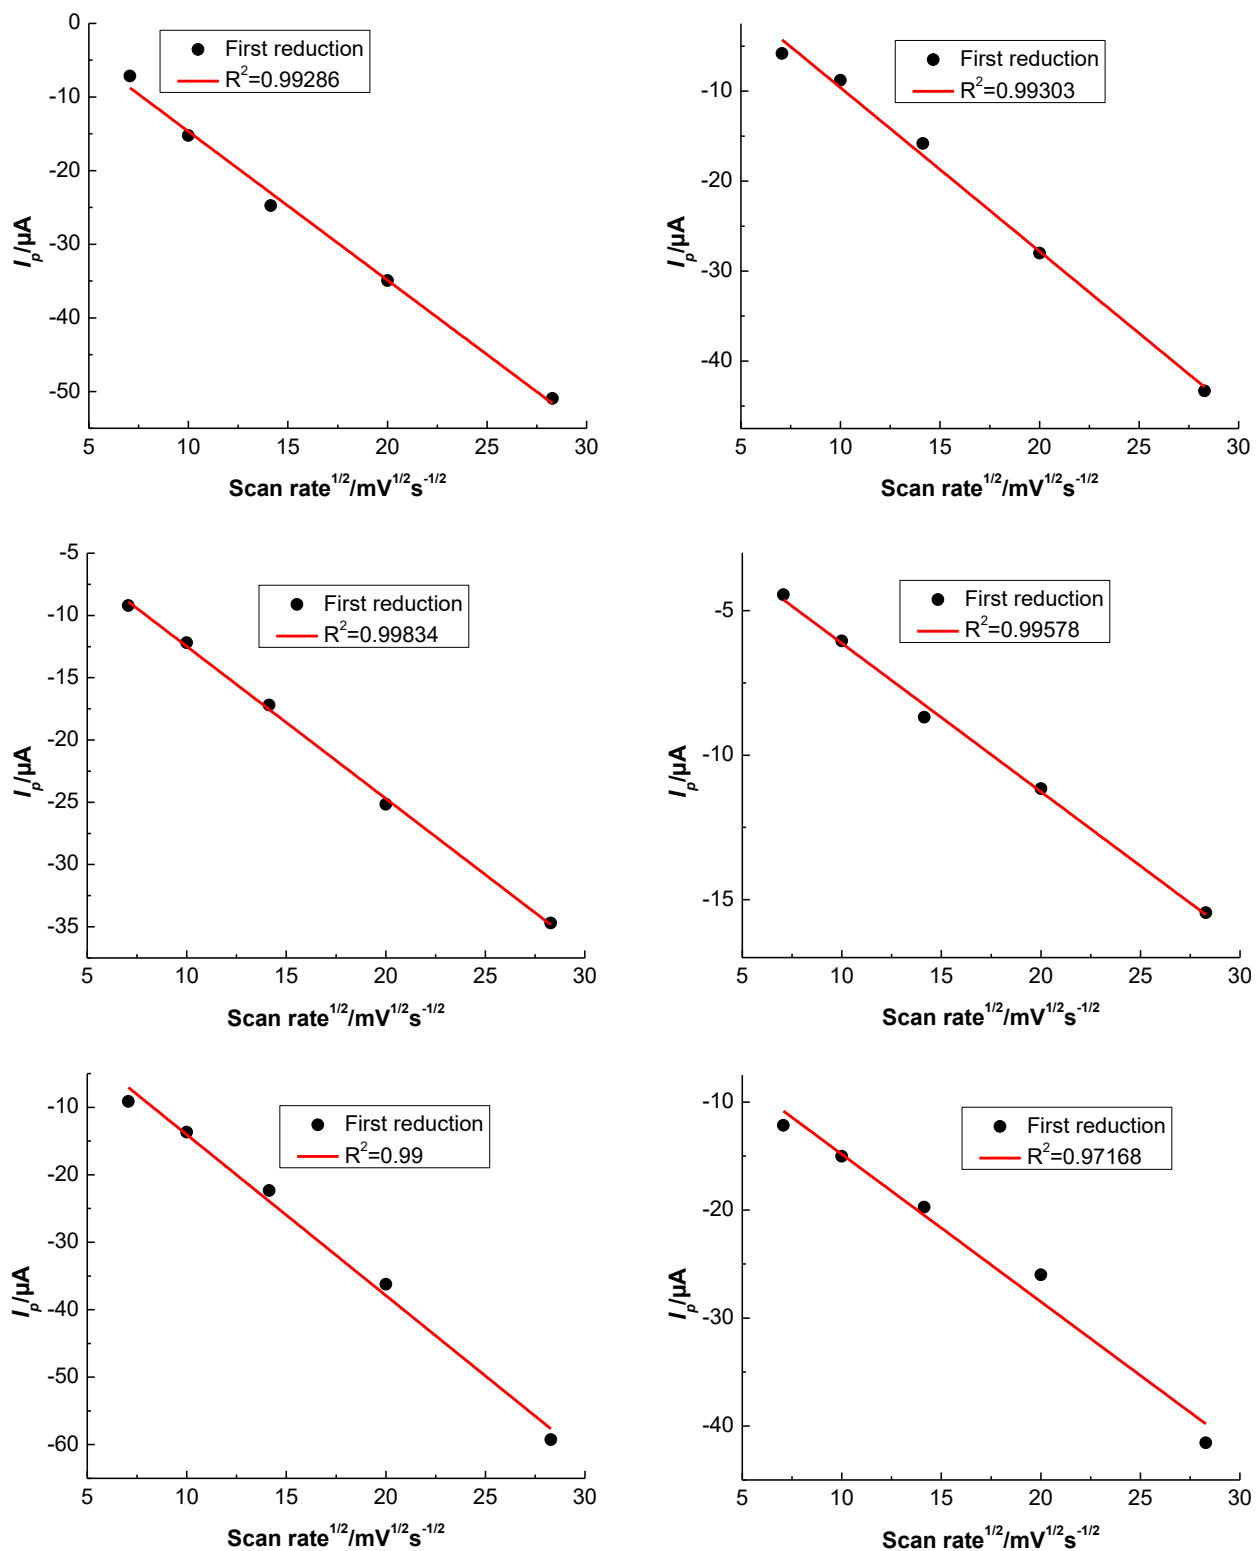

**Figure S101.** Dependency of the cathodic peak current (first reduction process) on the scan rate for **6d** (top left), **6f** (top right), **7d** (middle left), **7f** (middle right), **8d** (bottom left) and **8f** (bottom right).



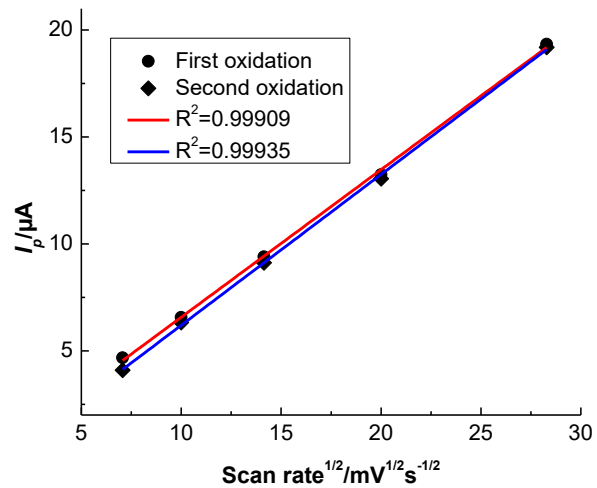

**Figure S102.** dependency of the anodic peak currents (first and second redox processes) on the scan rate for **11f**.

## Crystallographic data

CCDC numbers 2087015 (*cis*-**5d**), 2087016 (**3c**), 2252852 (*trans*-**6d**), and 2252853 (*cis*-**8f**) contain the supplementary crystallographic data for this paper, which can be obtained free of charge from the Cambridge Crystallographic Data Centre via [http://www.ccdc.cam.ac.uk/data\\_request/cif](http://www.ccdc.cam.ac.uk/data_request/cif).

### Crystal data and structure refinement for compound **3c**

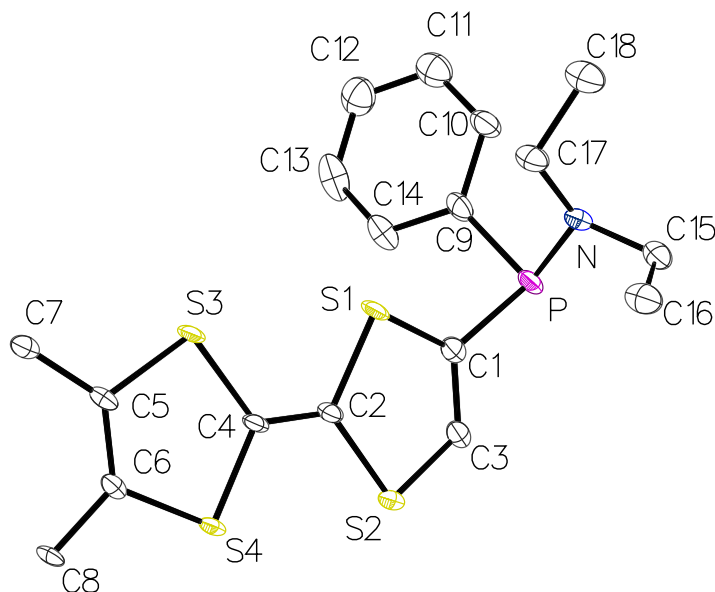

---

|                     |                                                    |
|---------------------|----------------------------------------------------|
| Identification code | GSTR711, SHK-297 // GXraycu_6477f                  |
| Crystal Habitus     | clear yellow plate                                 |
| Device Type         | Bruker D8 Venture                                  |
| Empirical formula   | C <sub>18</sub> H <sub>22</sub> NPS <sub>4</sub>   |
| Moiety formula      | C <sub>18</sub> H <sub>22</sub> N P S <sub>4</sub> |
| Formula weight      | 411.57                                             |
| Temperature/K       | 100.0                                              |
| Crystal system      | monoclinic                                         |
| Space group         | P2 <sub>1</sub> /n                                 |
| a/Å                 | 6.8055(3)                                          |
| b/Å                 | 7.6486(4)                                          |
| c/Å                 | 37.8273(16)                                        |
| α/°                 | 90                                                 |
| β/°                 | 92.938(2)                                          |

|                                                |                                                               |
|------------------------------------------------|---------------------------------------------------------------|
| $\gamma/^\circ$                                | 90                                                            |
| Volume/ $\text{\AA}^3$                         | 1966.42(16)                                                   |
| Z                                              | 4                                                             |
| $\rho_{\text{calc}}/\text{cm}^3$               | 1.390                                                         |
| $\mu/\text{mm}^{-1}$                           | 5.200                                                         |
| F(000)                                         | 864.0                                                         |
| Crystal size/ $\text{mm}^3$                    | $0.12 \times 0.09 \times 0.05$                                |
| Absorption correction                          | empirical                                                     |
| Tmin; Tmax                                     | 0.4144; 0.7536                                                |
| Radiation                                      | CuK $\alpha$ ( $\lambda = 1.54178$ )                          |
| 2 $\theta$ range for data collection/ $^\circ$ | 4.678 to 135.438 $^\circ$                                     |
| Completeness to theta                          | 0.984                                                         |
| Index ranges                                   | $-7 \leq h \leq 8, -9 \leq k \leq 9, -40 \leq l \leq 45$      |
| Reflections collected                          | 15066                                                         |
| Independent reflections                        | 3506 [ $R_{\text{int}} = 0.0683, R_{\text{sigma}} = 0.0534$ ] |
| Data/restraints/parameters                     | 3506/6/221                                                    |
| Goodness-of-fit on $F^2$                       | 1.066                                                         |
| Final R indexes [ $ I  \geq 2\sigma(I)$ ]      | $R_1 = 0.0620, wR_2 = 0.1725$                                 |
| Final R indexes [all data]                     | $R_1 = 0.0720, wR_2 = 0.1852$                                 |
| Largest diff. peak/hole / $e \text{\AA}^{-3}$  | 0.63/-0.78                                                    |

#### Bond Lengths

| Atom | Atom | Length/ $\text{\AA}$ | Atom | Atom | Length/ $\text{\AA}$ |
|------|------|----------------------|------|------|----------------------|
| S1   | C1   | 1.765(4)             | C1   | C3   | 1.329(6)             |
| S1   | C2   | 1.762(4)             | C2   | C4   | 1.340(6)             |
| S2   | C2   | 1.770(4)             | C5   | C6   | 1.336(6)             |
| S2   | C3   | 1.752(4)             | C5   | C7   | 1.501(6)             |
| S3   | C4   | 1.754(4)             | C6   | C8   | 1.493(5)             |
| S3   | C5   | 1.763(4)             | C9   | C10  | 1.410(6)             |
| S4   | C4   | 1.756(4)             | C9   | C14  | 1.399(6)             |
| S4   | C6   | 1.763(4)             | C10  | C11  | 1.388(7)             |
| P    | N    | 1.695(4)             | C11  | C12  | 1.386(7)             |
| P    | C1   | 1.833(4)             | C12  | C13  | 1.386(7)             |
| P    | C9   | 1.832(5)             | C13  | C14  | 1.374(7)             |
| N    | C15  | 1.479(6)             | C15  | C16  | 1.514(7)             |
| N    | C17  | 1.458(6)             | C17  | C18  | 1.523(6)             |

### Bond Angles

| Atom | Atom | Atom | Angle/°    | Atom | Atom | Atom | Angle/°  |
|------|------|------|------------|------|------|------|----------|
| C2   | S1   | C1   | 95.58(19)  | C2   | C4   | S3   | 122.5(3) |
| C3   | S2   | C2   | 94.06(19)  | C2   | C4   | S4   | 123.2(3) |
| C4   | S3   | C5   | 95.56(19)  | C6   | C5   | S3   | 117.3(3) |
| C4   | S4   | C6   | 95.64(19)  | C6   | C5   | C7   | 127.5(4) |
| N    | P    | C1   | 107.0(2)   | C7   | C5   | S3   | 115.2(3) |
| N    | P    | C9   | 101.15(19) | C5   | C6   | S4   | 117.1(3) |
| C9   | P    | C1   | 100.58(18) | C5   | C6   | C8   | 127.7(4) |
| C15  | N    | P    | 115.5(3)   | C8   | C6   | S4   | 115.2(3) |
| C17  | N    | P    | 123.9(3)   | C10  | C9   | P    | 120.7(3) |
| C17  | N    | C15  | 113.9(4)   | C14  | C9   | P    | 121.1(3) |
| S1   | C1   | P    | 123.6(2)   | C14  | C9   | C10  | 117.9(4) |
| C3   | C1   | S1   | 115.7(3)   | C11  | C10  | C9   | 120.6(4) |
| C3   | C1   | P    | 120.3(3)   | C12  | C11  | C10  | 120.6(5) |
| S1   | C2   | S2   | 114.0(2)   | C13  | C12  | C11  | 118.8(5) |
| C4   | C2   | S1   | 123.1(3)   | C14  | C13  | C12  | 121.5(4) |
| C4   | C2   | S2   | 122.9(3)   | C13  | C14  | C9   | 120.5(4) |
| C1   | C3   | S2   | 119.7(3)   | N    | C15  | C16  | 113.9(4) |

### Crystal data and structure refinement for compound *cis*-5d

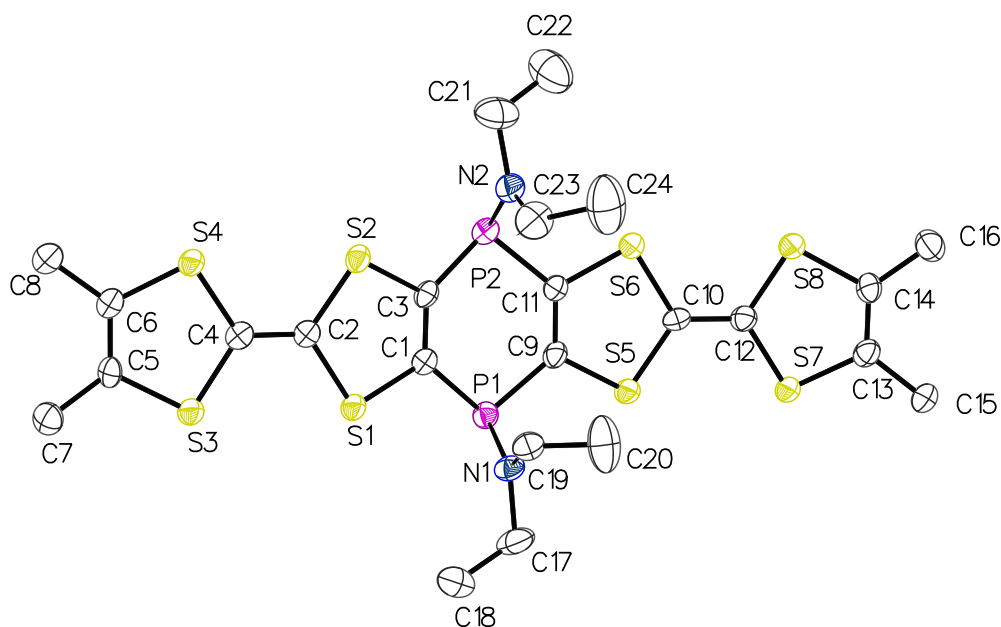

Identification code

GSTR689, SHK-150 // GXray6209f

Crystal Habitus

clear orange plate

|                                             |                                                                                               |
|---------------------------------------------|-----------------------------------------------------------------------------------------------|
| Device Type                                 | Bruker X8-KappaApexII                                                                         |
| Empirical formula                           | C <sub>49</sub> H <sub>66</sub> Cl <sub>2</sub> N <sub>4</sub> P <sub>4</sub> S <sub>16</sub> |
| Moiety formula                              | C H2 Cl2, 2(C24 H32 N2 P2 S8)                                                                 |
| Formula weight                              | 1418.79                                                                                       |
| Temperature/K                               | 100                                                                                           |
| Crystal system                              | monoclinic                                                                                    |
| Space group                                 | P2 <sub>1</sub> /n                                                                            |
| a/Å                                         | 15.909(2)                                                                                     |
| b/Å                                         | 11.9462(15)                                                                                   |
| c/Å                                         | 17.630(2)                                                                                     |
| α/°                                         | 90                                                                                            |
| β/°                                         | 107.950(3)                                                                                    |
| γ/°                                         | 90                                                                                            |
| Volume/Å <sup>3</sup>                       | 3187.4(7)                                                                                     |
| Z                                           | 2                                                                                             |
| ρ <sub>calc</sub> /g/cm <sup>3</sup>        | 1.478                                                                                         |
| μ/mm <sup>-1</sup>                          | 0.765                                                                                         |
| F(000)                                      | 1476.0                                                                                        |
| Crystal size/mm <sup>3</sup>                | 0.18 × 0.1 × 0.05                                                                             |
| Absorption correction                       | empirical                                                                                     |
| Tmin; Tmax                                  | 0.5748; 0.7461                                                                                |
| Radiation                                   | MoKα (λ = 0.71073)                                                                            |
| 2θ range for data collection/°              | 4.554 to 55.996°                                                                              |
| Completeness to theta                       | 0.997                                                                                         |
| Index ranges                                | -19 ≤ h ≤ 21, -15 ≤ k ≤ 15, -23 ≤ l ≤ 14                                                      |
| Reflections collected                       | 33038                                                                                         |
| Independent reflections                     | 7663 [R <sub>int</sub> = 0.1087, R <sub>sigma</sub> = 0.1051]                                 |
| Data/restraints/parameters                  | 7663/6/360                                                                                    |
| Goodness-of-fit on F <sup>2</sup>           | 1.060                                                                                         |
| Final R indexes [ >=2σ (I)]                 | R <sub>1</sub> = 0.0826, wR <sub>2</sub> = 0.1757                                             |
| Final R indexes [all data]                  | R <sub>1</sub> = 0.1361, wR <sub>2</sub> = 0.2018                                             |
| Largest diff. peak/hole / e Å <sup>-3</sup> | 1.00/-0.50                                                                                    |

#### Bond Lengths

| Atom | Atom | Length/Å  | Atom | Atom | Length/Å |
|------|------|-----------|------|------|----------|
| Cl1  | C25  | 1.726(17) | P2   | N2   | 1.657(5) |

|     |     |           |     |     |           |
|-----|-----|-----------|-----|-----|-----------|
| Cl2 | C25 | 1.722(18) | P2  | C3  | 1.819(5)  |
| S1  | C1  | 1.762(5)  | P2  | C11 | 1.816(5)  |
| S1  | C2  | 1.763(5)  | N1  | C17 | 1.466(7)  |
| S2  | C2  | 1.760(5)  | N1  | C19 | 1.451(7)  |
| S2  | C3  | 1.769(5)  | N2  | C21 | 1.479(8)  |
| S3  | C4  | 1.751(5)  | N2  | C23 | 1.465(8)  |
| S3  | C5  | 1.750(5)  | C1  | C3  | 1.342(7)  |
| S4  | C4  | 1.751(5)  | C2  | C4  | 1.338(8)  |
| S4  | C6  | 1.753(6)  | C5  | C6  | 1.353(8)  |
| S5  | C9  | 1.753(5)  | C5  | C7  | 1.501(8)  |
| S5  | C10 | 1.750(5)  | C6  | C8  | 1.498(7)  |
| S6  | C10 | 1.759(5)  | C9  | C11 | 1.343(7)  |
| S6  | C11 | 1.770(5)  | C10 | C12 | 1.358(8)  |
| S7  | C12 | 1.749(5)  | C13 | C14 | 1.338(8)  |
| S7  | C13 | 1.759(6)  | C13 | C15 | 1.503(7)  |
| S8  | C12 | 1.747(5)  | C14 | C16 | 1.501(8)  |
| S8  | C14 | 1.758(6)  | C17 | C18 | 1.473(10) |
| P1  | N1  | 1.684(5)  | C19 | C20 | 1.474(8)  |
| P1  | C1  | 1.821(5)  | C21 | C22 | 1.429(10) |
| P1  | C9  | 1.827(5)  | C23 | C24 | 1.455(10) |

#### Bond Angles

| Atom | Atom | Atom | Angle/°  | Atom | Atom | Atom | Angle/°  |
|------|------|------|----------|------|------|------|----------|
| Cl2  | C25  | Cl1  | 111.2(8) | C2   | C4   | S3   | 122.8(4) |
| C1   | S1   | C2   | 95.3(3)  | C2   | C4   | S4   | 123.7(4) |
| C2   | S2   | C3   | 95.0(2)  | C6   | C5   | S3   | 116.5(4) |
| C5   | S3   | C4   | 96.1(3)  | C6   | C5   | C7   | 126.8(5) |
| C4   | S4   | C6   | 95.8(3)  | C7   | C5   | S3   | 116.5(4) |
| C10  | S5   | C9   | 95.0(3)  | C5   | C6   | S4   | 116.9(4) |
| C10  | S6   | C11  | 95.0(2)  | C5   | C6   | C8   | 126.2(5) |
| C12  | S7   | C13  | 94.7(3)  | C8   | C6   | S4   | 116.8(4) |
| C12  | S8   | C14  | 95.1(3)  | S5   | C9   | P1   | 112.3(3) |
| N1   | P1   | C1   | 100.3(2) | C11  | C9   | S5   | 118.0(4) |
| N1   | P1   | C9   | 104.0(2) | C11  | C9   | P1   | 129.5(4) |
| C1   | P1   | C9   | 98.5(2)  | S5   | C10  | S6   | 114.4(3) |
| N2   | P2   | C3   | 103.2(2) | C12  | C10  | S5   | 123.6(4) |
| N2   | P2   | C11  | 104.2(2) | C12  | C10  | S6   | 122.0(4) |

|     |    |     |          |     |     |     |          |
|-----|----|-----|----------|-----|-----|-----|----------|
| C11 | P2 | C3  | 97.7(2)  | S6  | C11 | P2  | 113.5(3) |
| C17 | N1 | P1  | 119.2(4) | C9  | C11 | S6  | 116.3(4) |
| C19 | N1 | P1  | 124.1(4) | C9  | C11 | P2  | 129.4(4) |
| C19 | N1 | C17 | 116.6(5) | S8  | C12 | S7  | 114.5(3) |
| C21 | N2 | P2  | 119.3(5) | C10 | C12 | S7  | 122.7(4) |
| C23 | N2 | P2  | 123.8(4) | C10 | C12 | S8  | 122.8(4) |
| C23 | N2 | C21 | 115.9(5) | C14 | C13 | S7  | 117.5(4) |
| S1  | C1 | P1  | 113.2(3) | C14 | C13 | C15 | 126.8(5) |
| C3  | C1 | S1  | 117.1(4) | C15 | C13 | S7  | 115.6(4) |
| C3  | C1 | P1  | 129.7(4) | C13 | C14 | S8  | 116.7(4) |
| S2  | C2 | S1  | 113.4(3) | C13 | C14 | C16 | 127.4(5) |
| C4  | C2 | S1  | 122.8(4) | C16 | C14 | S8  | 115.9(4) |
| C4  | C2 | S2  | 123.8(4) | N1  | C17 | C18 | 113.8(6) |
| S2  | C3 | P2  | 113.8(3) | N1  | C19 | C20 | 114.9(5) |
| C1  | C3 | S2  | 116.8(4) | C22 | C21 | N2  | 114.9(7) |
| C1  | C3 | P2  | 129.2(4) | C24 | C23 | N2  | 115.6(7) |
| S3  | C4 | S4  | 113.5(3) |     |     |     |          |

### Crystal data and structure refinement for compound *trans*-6d

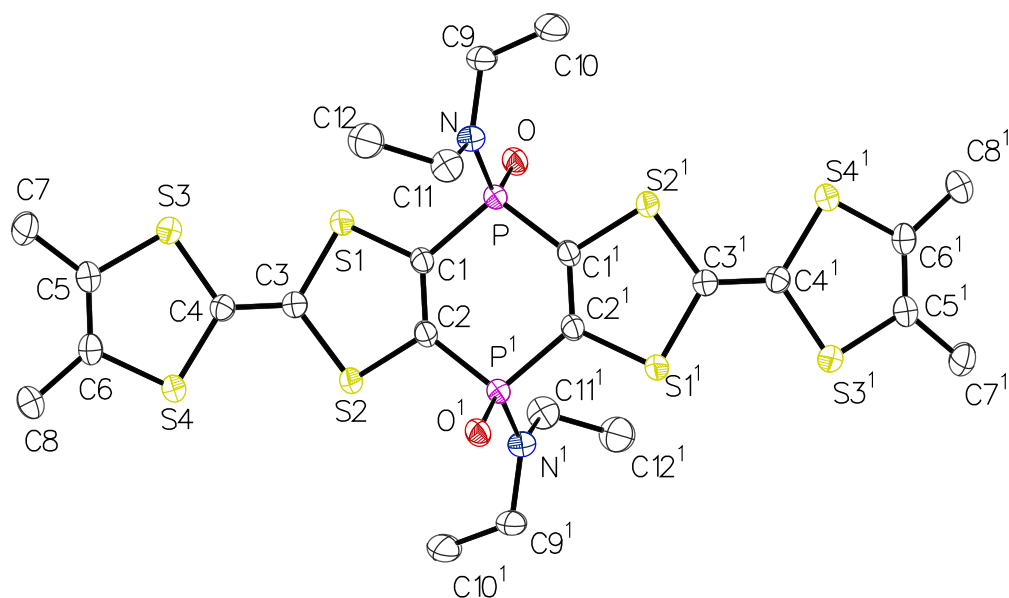

|                     |                                                                                                             |
|---------------------|-------------------------------------------------------------------------------------------------------------|
| Identification code | GSTR782, SHK-499 // GXray7037                                                                               |
| Crystal Habitus     | clear brown plate                                                                                           |
| Device Type         | STOE STADIVARI                                                                                              |
| Empirical formula   | C <sub>25</sub> H <sub>32</sub> Cl <sub>2</sub> N <sub>2</sub> O <sub>2</sub> P <sub>2</sub> S <sub>8</sub> |

|                                             |                                                               |
|---------------------------------------------|---------------------------------------------------------------|
| Moiety formula                              | C H2 Cl2, C24 H32 N2 O2 P2 S8                                 |
| Formula weight                              | 781.84                                                        |
| Temperature/K                               | 100                                                           |
| Crystal system                              | monoclinic                                                    |
| Space group                                 | C2/c                                                          |
| a/Å                                         | 23.9063(4)                                                    |
| b/Å                                         | 7.61506(10)                                                   |
| c/Å                                         | 19.2661(3)                                                    |
| α/°                                         | 90                                                            |
| β/°                                         | 102.0920(10)                                                  |
| γ/°                                         | 90                                                            |
| Volume/Å <sup>3</sup>                       | 3429.53(9)                                                    |
| Z                                           | 4                                                             |
| ρ <sub>calc</sub> /cm <sup>3</sup>          | 1.514                                                         |
| μ/mm <sup>-1</sup>                          | 7.374                                                         |
| F(000)                                      | 1616.0                                                        |
| Crystal size/mm <sup>3</sup>                | 0.075 × 0.07 × 0.02                                           |
| Absorption correction                       | multi-scan                                                    |
| Tmin; Tmax                                  | 0.4930; 0.6081                                                |
| Radiation                                   | CuKα (λ = 1.54186)                                            |
| 2θ range for data collection/°              | 7.564 to 135.468°                                             |
| Completeness to theta                       | 1.000                                                         |
| Index ranges                                | -26 ≤ h ≤ 28, -7 ≤ k ≤ 9, -22 ≤ l ≤ 22                        |
| Reflections collected                       | 87125                                                         |
| Independent reflections                     | 3093 [R <sub>int</sub> = 0.0524, R <sub>sigma</sub> = 0.0121] |
| Data/restraints/parameters                  | 3093/238/231                                                  |
| Goodness-of-fit on F <sup>2</sup>           | 1.038                                                         |
| Final R indexes [I >= 2σ (I)]               | R <sub>1</sub> = 0.0352, wR <sub>2</sub> = 0.0917             |
| Final R indexes [all data]                  | R <sub>1</sub> = 0.0400, wR <sub>2</sub> = 0.0954             |
| Largest diff. peak/hole / e Å <sup>-3</sup> | 0.70/-0.46                                                    |

#### Bond Lengths

| Atom | Atom | Length/Å  | Atom | Atom            | Length/Å |
|------|------|-----------|------|-----------------|----------|
| Cl1  | C13  | 1.708(8)  | P    | N               | 1.629(2) |
| Cl2  | C13  | 1.728(9)  | P    | C1              | 1.800(2) |
| Cl1S | C13S | 1.702(10) | P    | C2 <sup>1</sup> | 1.802(2) |
| Cl2S | C13S | 1.703(10) | N    | C9              | 1.476(3) |
| S1   | C1   | 1.761(2)  | N    | C11             | 1.481(3) |
| S1   | C3   | 1.760(2)  | C1   | C2              | 1.347(3) |
| S2   | C2   | 1.770(2)  | C3   | C4              | 1.345(3) |
| S2   | C3   | 1.757(2)  | C5   | C6              | 1.332(4) |
| S3   | C4   | 1.749(2)  | C5   | C7              | 1.500(4) |



|    |    |            |     |     |          |
|----|----|------------|-----|-----|----------|
| S3 | C5 | 1.767(2)   | C6  | C8  | 1.492(3) |
| S4 | C4 | 1.750(2)   | C9  | C10 | 1.502(4) |
| S4 | C6 | 1.766(2)   | C11 | C12 | 1.525(4) |
| P  | O  | 1.4905(17) |     |     |          |

#### Bond Angles

| Atom | Atom | Atom            | Angle/°    | Atom | Atom | Atom           | Angle/°    |
|------|------|-----------------|------------|------|------|----------------|------------|
| Cl1  | C13  | Cl2             | 110.4(6)   | S2   | C2   | P <sup>1</sup> | 115.06(13) |
| Cl1S | C13S | Cl2S            | 98.6(18)   | C1   | C2   | S2             | 116.59(18) |
| C3   | S1   | C1              | 93.39(11)  | C1   | C2   | P <sup>1</sup> | 128.34(18) |
| C3   | S2   | C2              | 93.08(11)  | S2   | C3   | S1             | 113.39(13) |
| C4   | S3   | C5              | 95.53(12)  | C4   | C3   | S1             | 122.41(19) |
| C4   | S4   | C6              | 95.39(12)  | C4   | C3   | S2             | 124.07(19) |
| O    | P    | N               | 113.18(10) | S3   | C4   | S4             | 113.89(13) |
| O    | P    | C1              | 111.10(11) | C3   | C4   | S3             | 122.43(19) |
| O    | P    | C2 <sup>1</sup> | 112.67(10) | C3   | C4   | S4             | 123.68(19) |
| N    | P    | C1              | 108.28(11) | C6   | C5   | S3             | 116.73(19) |
| N    | P    | C2 <sup>1</sup> | 107.61(11) | C6   | C5   | C7             | 128.7(2)   |
| C1   | P    | C2 <sup>1</sup> | 103.45(11) | C7   | C5   | S3             | 114.51(19) |
| C9   | N    | P               | 121.18(18) | C5   | C6   | S4             | 117.14(19) |
| C9   | N    | C11             | 118.2(2)   | C5   | C6   | C8             | 128.4(2)   |
| C11  | N    | P               | 119.98(17) | C8   | C6   | S4             | 114.46(19) |
| S1   | C1   | P               | 115.20(13) | N    | C9   | C10            | 114.2(2)   |
| C2   | C1   | S1              | 117.00(18) | N    | C11  | C12            | 112.5(2)   |
| C2   | C1   | P               | 127.13(18) |      |      |                |            |

## Crystal data and structure refinement for compound *cis*-8f

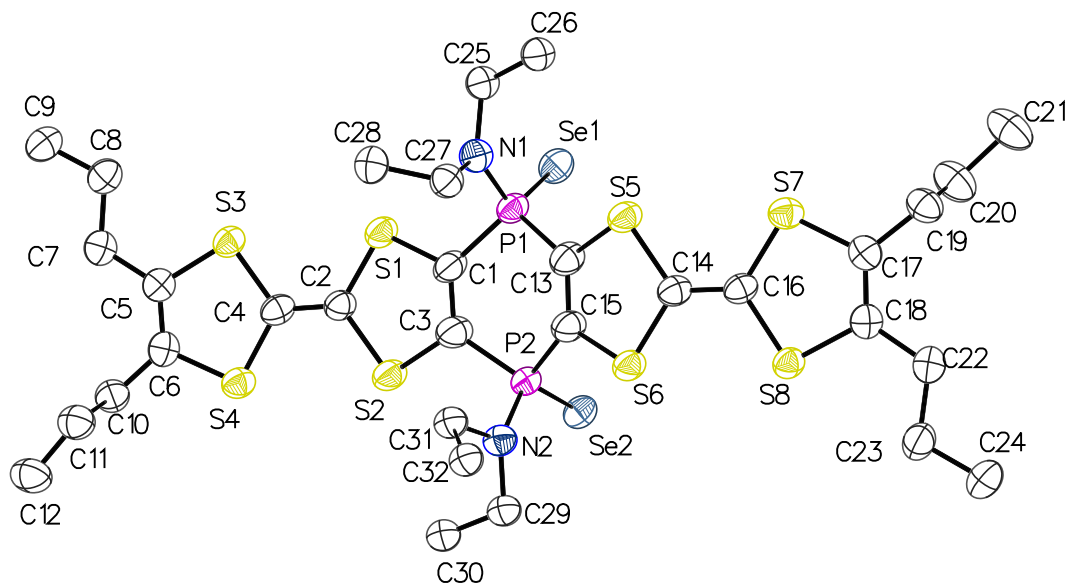

|                                    |                                                                                              |
|------------------------------------|----------------------------------------------------------------------------------------------|
| Identification code                | GSTR783, SHK-474 // GXray7038                                                                |
| Crystal Habitus                    | clear dark red block                                                                         |
| Device Type                        | STOE STADIVARI                                                                               |
| Empirical formula                  | C <sub>32</sub> H <sub>48</sub> N <sub>2</sub> P <sub>2</sub> S <sub>8</sub> Se <sub>2</sub> |
| Moiety formula                     | C <sub>32</sub> H <sub>48</sub> N <sub>2</sub> P <sub>2</sub> S <sub>8</sub> Se <sub>2</sub> |
| Formula weight                     | 937.06                                                                                       |
| Temperature/K                      | 100                                                                                          |
| Crystal system                     | monoclinic                                                                                   |
| Space group                        | P2 <sub>1</sub> /c                                                                           |
| a/Å                                | 25.4912(5)                                                                                   |
| b/Å                                | 7.70630(10)                                                                                  |
| c/Å                                | 21.8491(5)                                                                                   |
| α/°                                | 90.00                                                                                        |
| β/°                                | 108.0643(16)                                                                                 |
| γ/°                                | 90.00                                                                                        |
| Volume/Å <sup>3</sup>              | 4080.54(14)                                                                                  |
| Z                                  | 4                                                                                            |
| ρ <sub>calc</sub> /cm <sup>3</sup> | 1.525                                                                                        |
| μ/mm <sup>-1</sup>                 | 7.03                                                                                         |
| F(000)                             | 1920.0                                                                                       |
| Crystal size/mm <sup>3</sup>       | 0.15 × 0.13 × 0.1                                                                            |
| Absorption correction              | multi-scan                                                                                   |
| Tmin; Tmax                         | 0.1542; 0.3100                                                                               |
| Radiation                          | CuKα (λ = 1.54186)                                                                           |
| 2θ range for data collection/°     | 7.296 to 135.474°                                                                            |

|                                             |                                                               |
|---------------------------------------------|---------------------------------------------------------------|
| Completeness to theta                       | 0.999                                                         |
| Index ranges                                | -30 ≤ h ≤ 28, -8 ≤ k ≤ 9, -26 ≤ l ≤ 24                        |
| Reflections collected                       | 63776                                                         |
| Independent reflections                     | 7388 [R <sub>int</sub> = 0.0543, R <sub>sigma</sub> = 0.0255] |
| Data/restraints/parameters                  | 7388/230/561                                                  |
| Goodness-of-fit on F <sup>2</sup>           | 1.183                                                         |
| Final R indexes [I ≥ 2σ (I)]                | R <sub>1</sub> = 0.0697, wR <sub>2</sub> = 0.1759             |
| Final R indexes [all data]                  | R <sub>1</sub> = 0.0748, wR <sub>2</sub> = 0.1790             |
| Largest diff. peak/hole / e Å <sup>-3</sup> | 1.00/-0.72                                                    |

#### Bond Lengths

| Atom | Atom | Length/Å  | Atom | Atom | Length/Å  |
|------|------|-----------|------|------|-----------|
| Se1  | P1   | 2.081(2)  | N1   | C27  | 1.461(10) |
| Se1S | P1S  | 2.07(2)   | N1S  | C25S | 1.482(10) |
| Se2  | P2   | 2.079(2)  | N1S  | C27S | 1.484(10) |
| Se2S | P2S  | 2.084(10) | N2   | C29  | 1.477(7)  |
| S1   | C1   | 1.753(6)  | N2   | C31  | 1.487(8)  |
| S1   | C2   | 1.745(6)  | N2S  | C29S | 1.485(10) |
| S2   | C2   | 1.778(6)  | N2S  | C31S | 1.52(3)   |
| S2   | C3   | 1.759(7)  | C1   | C3   | 1.344(9)  |
| S3   | C4   | 1.759(6)  | C2   | C4   | 1.334(8)  |
| S3   | C5   | 1.762(6)  | C5   | C6   | 1.344(8)  |
| S4   | C4   | 1.748(6)  | C5   | C7   | 1.502(8)  |
| S4   | C6   | 1.758(6)  | C6   | C10  | 1.504(8)  |
| S5   | C13  | 1.739(7)  | C7   | C8   | 1.510(9)  |
| S5   | C14  | 1.780(6)  | C8   | C9   | 1.523(9)  |
| S6   | C14  | 1.744(6)  | C10  | C11  | 1.530(9)  |
| S6   | C15  | 1.772(6)  | C11  | C12  | 1.523(9)  |
| S7   | C16  | 1.740(6)  | C13  | C15  | 1.357(9)  |
| S7   | C17  | 1.757(7)  | C14  | C16  | 1.338(8)  |
| S8   | C16  | 1.756(6)  | C17  | C18  | 1.345(9)  |
| S8   | C18  | 1.753(6)  | C17  | C19  | 1.507(8)  |
| P1   | N1   | 1.651(6)  | C18  | C22  | 1.507(8)  |
| P1   | C1   | 1.806(7)  | C19  | C20  | 1.522(10) |
| P1   | C13  | 1.813(6)  | C20  | C21  | 1.526(10) |
| P1S  | N1S  | 1.65(5)   | C22  | C23  | 1.515(9)  |
| P1S  | C1   | 1.963(17) | C23  | C24  | 1.507(9)  |
| P1S  | C13  | 2.074(18) | C25  | C26  | 1.481(11) |
| P2   | N2   | 1.652(7)  | C25S | C26S | 1.63(9)   |
| P2   | C3   | 1.824(7)  | C27  | C28  | 1.526(11) |

|     |     |           |      |      |           |
|-----|-----|-----------|------|------|-----------|
| P2  | C15 | 1.793(6)  | C27S | C28S | 1.495(10) |
| P2S | N2S | 1.60(2)   | C29  | C30  | 1.507(12) |
| P2S | C3  | 2.019(10) | C29S | C30S | 1.45(4)   |
| P2S | C15 | 2.020(10) | C31  | C32  | 1.516(8)  |
| N1  | C25 | 1.480(9)  | C31S | C32S | 1.511(10) |

### Bond Angles

| Atom | Atom | Atom | Angle/°   | Atom | Atom | Atom | Angle/°  |
|------|------|------|-----------|------|------|------|----------|
| C2   | S1   | C1   | 95.3(3)   | S2   | C3   | P2   | 115.4(4) |
| C3   | S2   | C2   | 93.9(3)   | S2   | C3   | P2S  | 106.4(4) |
| C4   | S3   | C5   | 95.8(3)   | C1   | C3   | S2   | 117.9(5) |
| C4   | S4   | C6   | 95.6(3)   | C1   | C3   | P2   | 126.2(5) |
| C13  | S5   | C14  | 93.6(3)   | C1   | C3   | P2S  | 125.8(6) |
| C14  | S6   | C15  | 93.0(3)   | S4   | C4   | S3   | 114.4(3) |
| C16  | S7   | C17  | 95.5(3)   | C2   | C4   | S3   | 122.5(5) |
| C18  | S8   | C16  | 95.4(3)   | C2   | C4   | S4   | 123.1(4) |
| N1   | P1   | Se1  | 115.2(2)  | C6   | C5   | S3   | 116.5(5) |
| N1   | P1   | C1   | 105.0(3)  | C6   | C5   | C7   | 125.5(5) |
| N1   | P1   | C13  | 105.7(3)  | C7   | C5   | S3   | 118.0(4) |
| C1   | P1   | Se1  | 112.8(2)  | C5   | C6   | S4   | 117.7(5) |
| C1   | P1   | C13  | 101.5(3)  | C5   | C6   | C10  | 127.0(5) |
| C13  | P1   | Se1  | 115.1(2)  | C10  | C6   | S4   | 115.3(4) |
| Se1S | P1S  | C13  | 132.6(8)  | C5   | C7   | C8   | 117.0(5) |
| N1S  | P1S  | Se1S | 118.9(16) | C7   | C8   | C9   | 112.6(5) |
| N1S  | P1S  | C1   | 85.4(17)  | C6   | C10  | C11  | 113.5(5) |
| N1S  | P1S  | C13  | 83.4(18)  | C12  | C11  | C10  | 111.0(6) |
| C1   | P1S  | Se1S | 131.8(9)  | S5   | C13  | P1   | 117.0(4) |
| C1   | P1S  | C13  | 87.9(7)   | S5   | C13  | P1S  | 110.9(5) |
| N2   | P2   | Se2  | 115.5(2)  | C15  | C13  | S5   | 116.6(5) |
| N2   | P2   | C3   | 106.0(4)  | C15  | C13  | P1   | 126.4(5) |
| N2   | P2   | C15  | 102.0(3)  | C15  | C13  | P1S  | 115.2(6) |
| C3   | P2   | Se2  | 115.8(3)  | S6   | C14  | S5   | 113.4(3) |
| C15  | P2   | Se2  | 115.1(3)  | C16  | C14  | S5   | 122.9(5) |
| C15  | P2   | C3   | 100.5(3)  | C16  | C14  | S6   | 123.7(5) |
| N2S  | P2S  | Se2S | 115.6(8)  | S6   | C15  | P2   | 114.8(3) |
| N2S  | P2S  | C3   | 92.8(8)   | S6   | C15  | P2S  | 104.9(4) |
| N2S  | P2S  | C15  | 97.3(8)   | C13  | C15  | S6   | 117.2(5) |
| C3   | P2S  | Se2S | 131.5(5)  | C13  | C15  | P2   | 127.4(5) |

|      |     |      |           |      |      |      |          |
|------|-----|------|-----------|------|------|------|----------|
| C3   | P2S | C15  | 87.1(4)   | C13  | C15  | P2S  | 128.6(5) |
| C15  | P2S | Se2S | 123.9(4)  | S7   | C16  | S8   | 114.8(3) |
| C25  | N1  | P1   | 123.3(5)  | C14  | C16  | S7   | 123.8(5) |
| C27  | N1  | P1   | 119.0(5)  | C14  | C16  | S8   | 121.5(5) |
| C27  | N1  | C25  | 116.5(6)  | C18  | C17  | S7   | 117.3(5) |
| C25S | N1S | P1S  | 114(4)    | C18  | C17  | C19  | 126.9(6) |
| C25S | N1S | C27S | 129(5)    | C19  | C17  | S7   | 115.8(5) |
| C27S | N1S | P1S  | 117(4)    | C17  | C18  | S8   | 117.0(5) |
| C29  | N2  | P2   | 121.5(5)  | C17  | C18  | C22  | 125.0(6) |
| C29  | N2  | C31  | 117.2(7)  | C22  | C18  | S8   | 118.0(5) |
| C31  | N2  | P2   | 117.9(6)  | C17  | C19  | C20  | 113.7(6) |
| C29S | N2S | P2S  | 121.3(18) | C19  | C20  | C21  | 112.0(6) |
| C29S | N2S | C31S | 116(2)    | C18  | C22  | C23  | 116.7(5) |
| C31S | N2S | P2S  | 121.6(15) | C24  | C23  | C22  | 111.8(6) |
| S1   | C1  | P1   | 114.9(3)  | N1   | C25  | C26  | 113.0(6) |
| S1   | C1  | P1S  | 109.9(5)  | N1S  | C25S | C26S | 109(5)   |
| C3   | C1  | S1   | 116.6(5)  | N1   | C27  | C28  | 114.0(6) |
| C3   | C1  | P1   | 127.8(5)  | N1S  | C27S | C28S | 119(5)   |
| C3   | C1  | P1S  | 120.4(7)  | N2   | C29  | C30  | 114.0(7) |
| S1   | C2  | S2   | 113.8(3)  | C30S | C29S | N2S  | 111(2)   |
| C4   | C2  | S1   | 124.1(5)  | N2   | C31  | C32  | 111.1(7) |
| C4   | C2  | S2   | 122.0(5)  | C32S | C31S | N2S  | 111(2)   |

## Theoretical calculations

### Frontier molecular orbitals

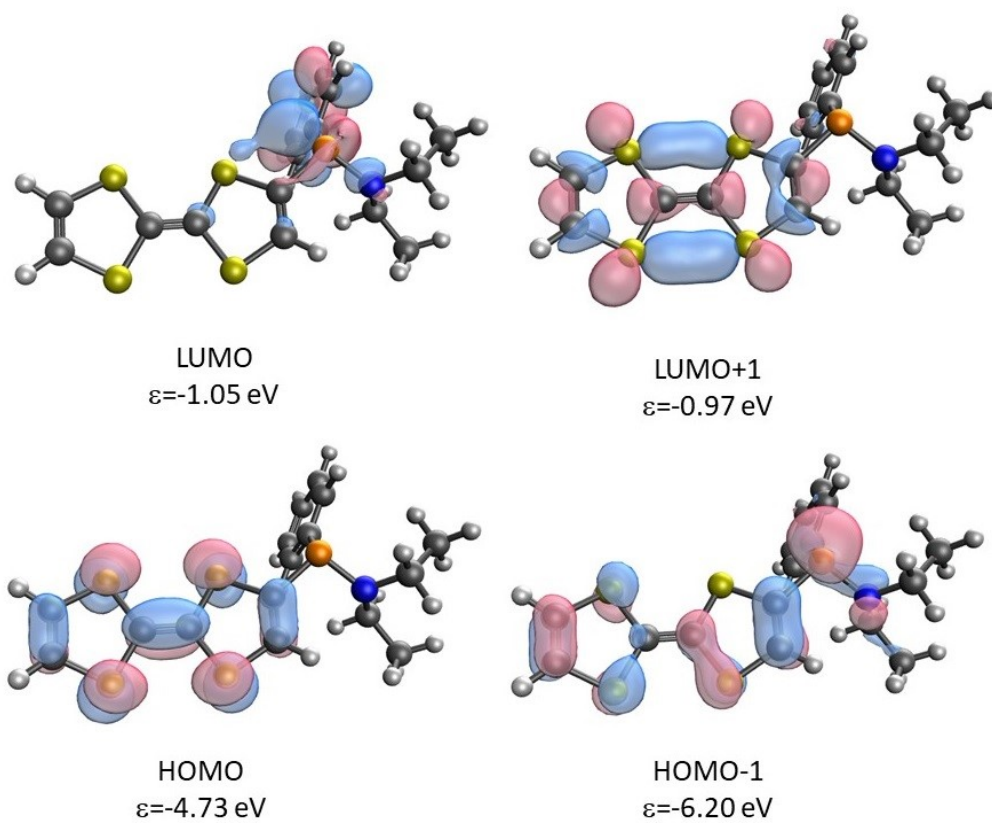

**Figure S103.** Kohn-Salm molecular orbitals of **3a** at B3LYP/6-311+G\*\*//M06-2X/6-311+G\*\* level of theory.

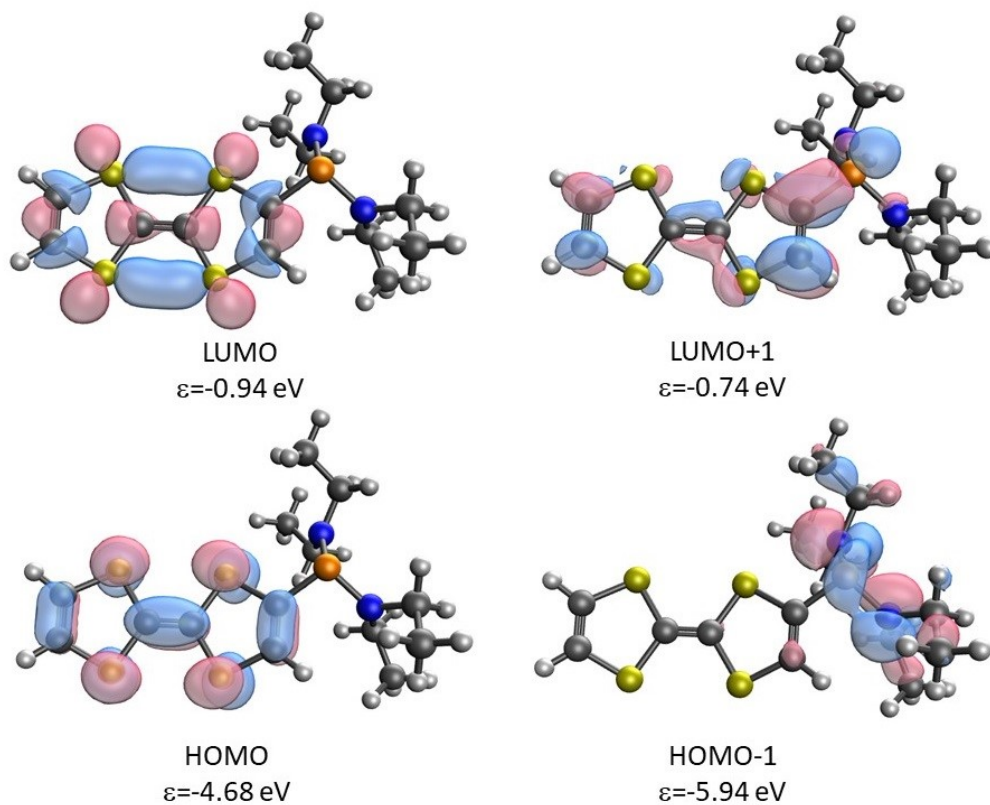

**Figure S104.** Kohn-Sham molecular orbitals of **3b** at B3LYP/6-311+G\*\*//M06-2X/6-311+G\*\* level of theory.

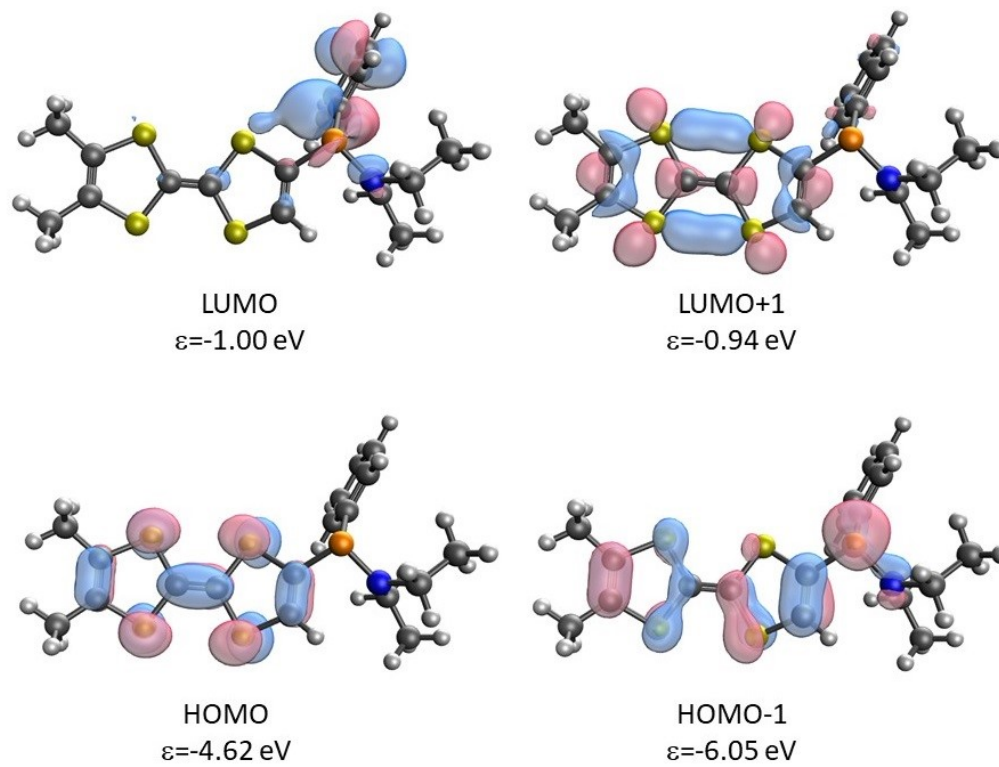

**Figure S105.** Kohn-Sham molecular orbitals of **3c** at B3LYP/6-311+G\*\*//M06-2X/6-311+G\*\* level of theory.

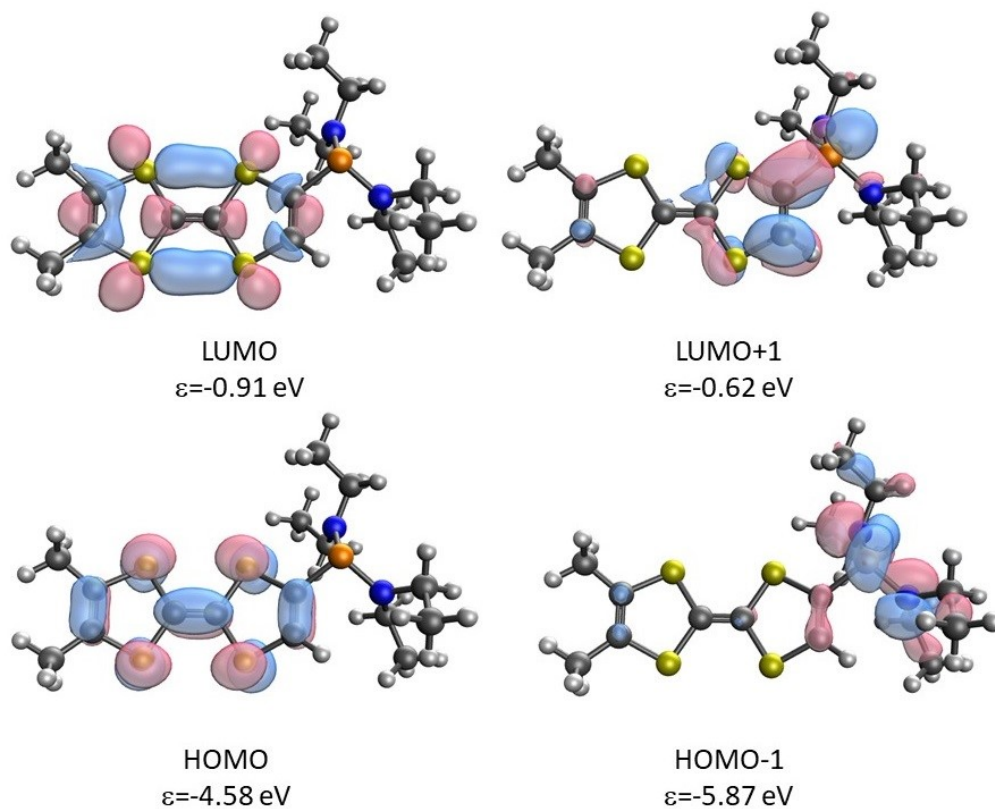

**Figure S106.** Kohn-Sham molecular orbitals of **3d** at B3LYP/6-311+G\*\*//M06-2X/6-311+G\*\* level of theory.

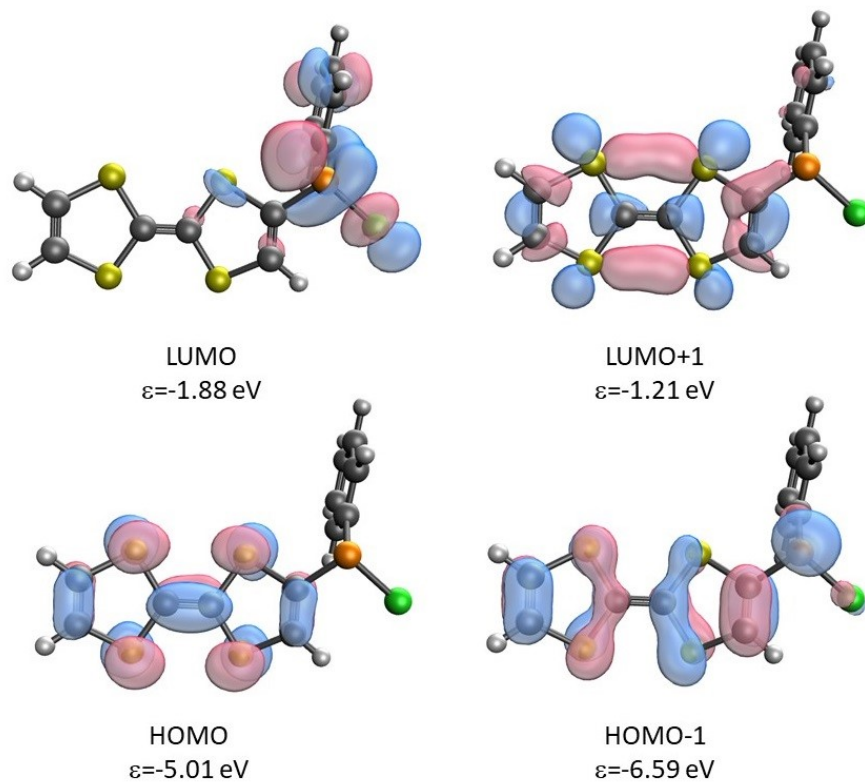

**Figure S107.** Kohn-Sham molecular orbitals of **4a** at B3LYP/6-311+G\*\*//M06-2X/6-311+G\*\* level of theory.



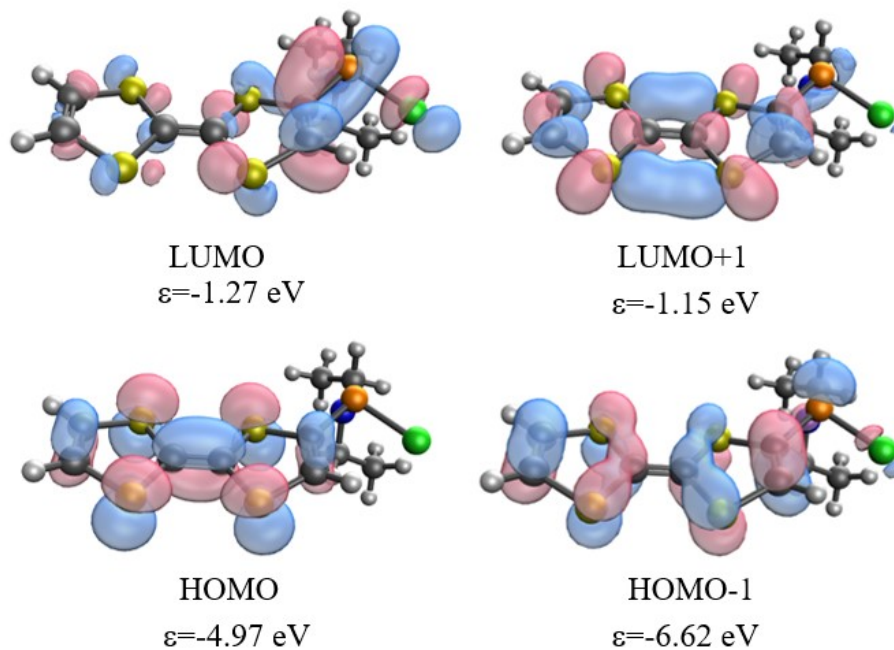

**Figure S108.** Kohn-Sham molecular orbitals of **4b** at B3LYP/6-311+G\*\*//M06-2X/6-311+G\*\* level of theory.

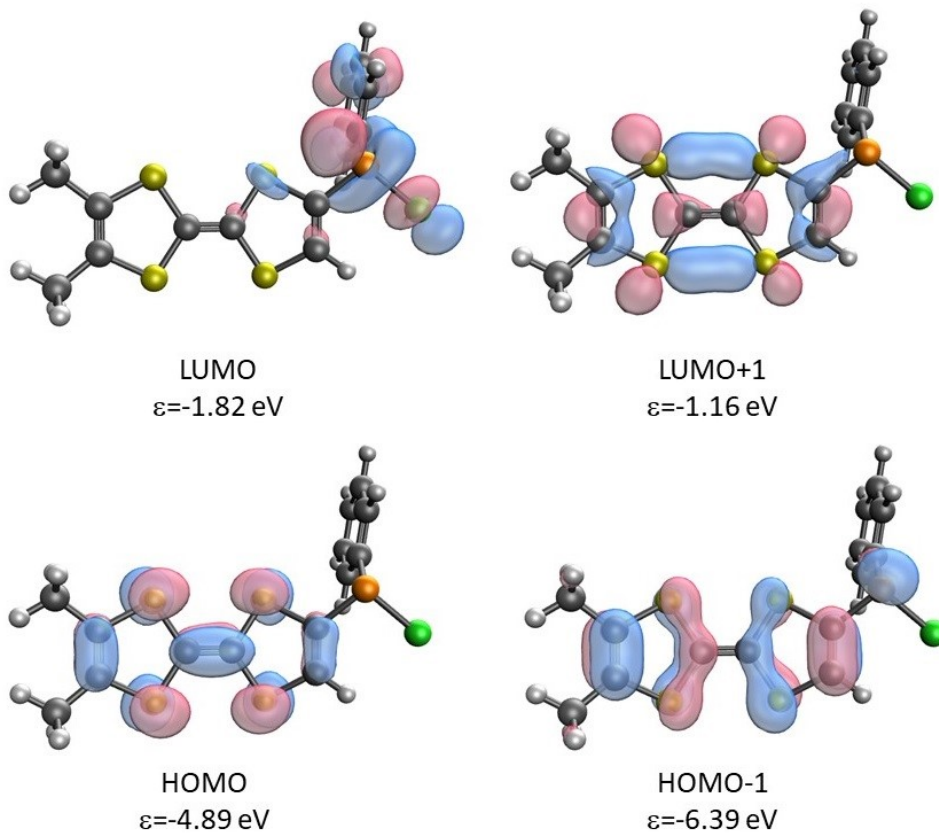

**Figure S109.** Kohn-Sham molecular orbitals of **4c** at B3LYP/6-311+G\*\*//M06-2X/6-311+G\*\* level of theory.

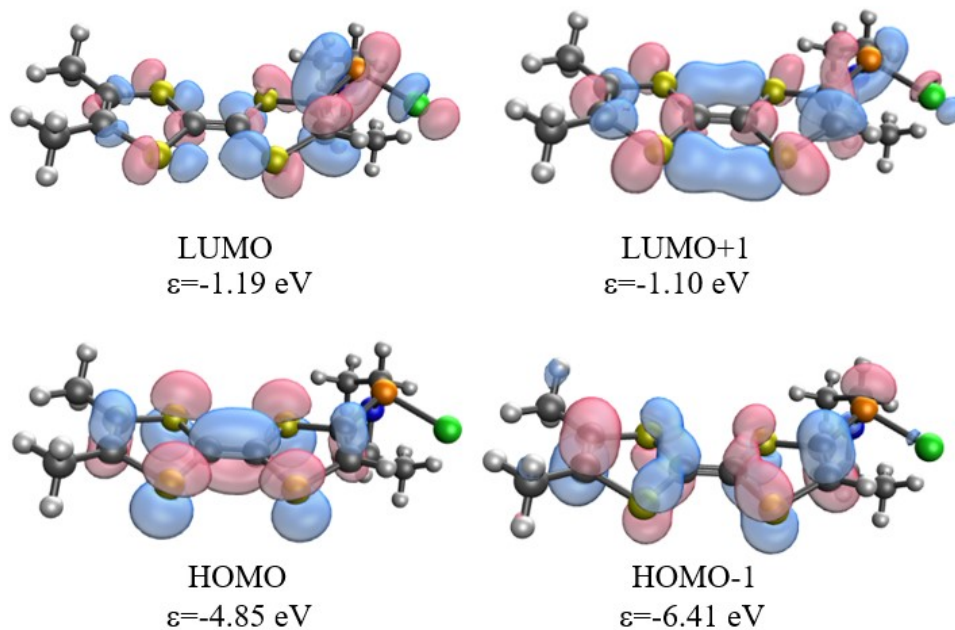

**Figure S110.** Kohn-Sham molecular orbitals of **4d** at B3LYP/6-311+G\*\*//M06-2X/6-311+G\*\* level of theory.

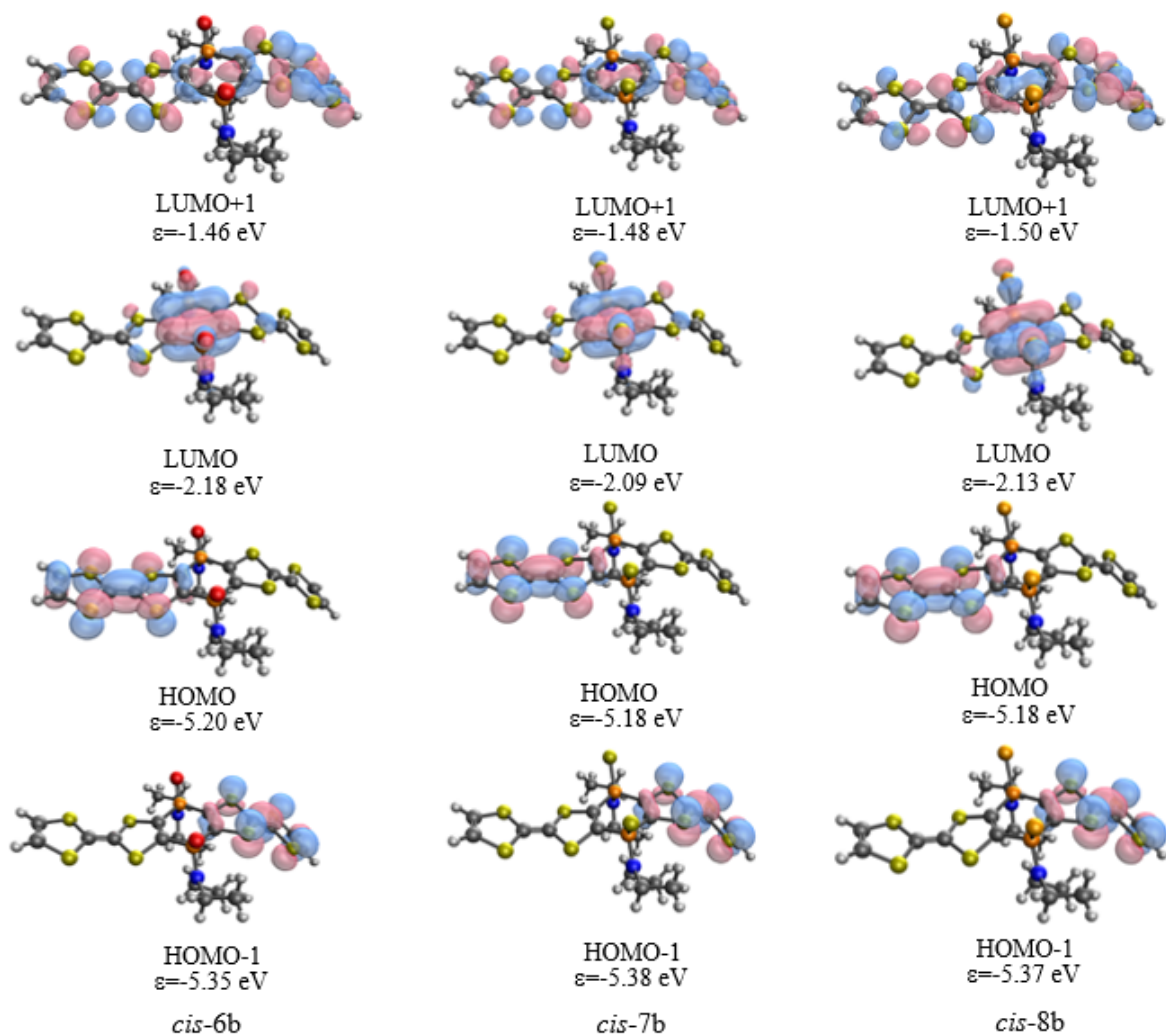

**Figure S111.** Kohn-Sham molecular orbitals of *cis-6b*, *cis-7b* and *cis-8b* at B3LYP/6-311+G\*\*//M06-2X/6-311+G\*\* level of theory.

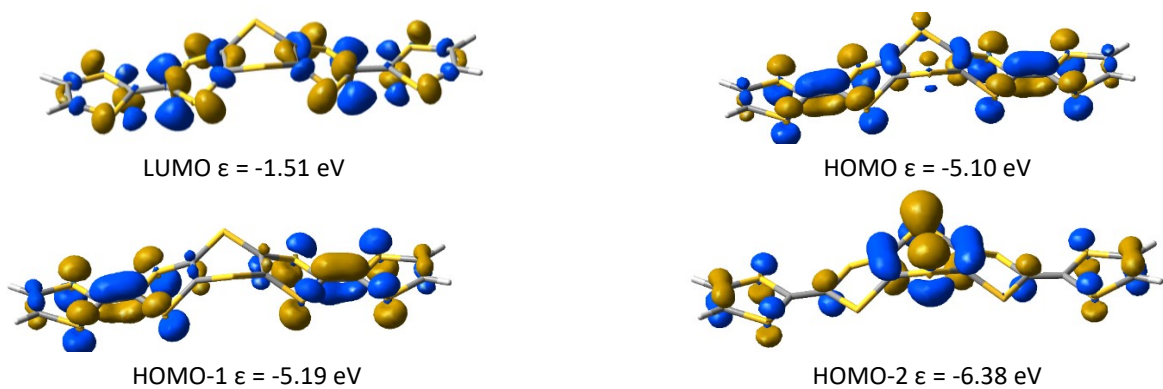

**Figure S112.** Kohn-Sham molecular orbitals of **IVa-H<sub>4</sub>** as computed at B3LYP/6-31++G\*\* level of theory.

## Details of DFT calculations

All calculations have been carried out with the Gaussian16.<sup>19</sup> For visualization, MOLDEN<sup>20</sup> and IQmol<sup>21</sup> programs were used. Full geometry optimization was performed at the M06-2X/6-311+G\*\* level of theory for each molecule. Minima are characterized by only positive eigenvalues, and transition states by a single negative eigenvalue of the Hessian.

XYZ coordinates of the investigated systems at M06-2X/6-311+G\*\* level of theory

benzene

12

scf done: -232.198347

|   |           |          |           |
|---|-----------|----------|-----------|
| C | 0.000000  | 0.000000 | 0.000000  |
| C | 0.000000  | 0.000000 | 1.400000  |
| C | 1.212436  | 0.000000 | 2.100000  |
| C | 2.424871  | 0.000000 | 1.400000  |
| C | 2.424871  | 0.000000 | 0.000000  |
| C | 1.212436  | 0.000000 | -0.700000 |
| H | -0.943102 | 0.000000 | 1.944500  |
| H | 1.212436  | 0.000000 | 3.189000  |
| H | 3.367973  | 0.000000 | 1.944500  |
| H | 3.367973  | 0.000000 | -0.544500 |
| H | 1.212436  | 0.000000 | -1.789000 |
| H | -1.026719 | 0.000000 | -0.363000 |

3a

40

scf done: -2609.204794

|   |           |           |           |
|---|-----------|-----------|-----------|
| S | 0.122533  | 0.105760  | 0.099644  |
| C | 0.059791  | 0.035705  | 1.868947  |
| S | 1.649475  | -0.046361 | 2.646812  |
| C | 2.506713  | -0.388703 | 1.153398  |
| C | 1.823292  | -0.320319 | 0.014088  |
| C | -1.090296 | 0.049601  | 2.558329  |
| S | -2.679106 | 0.165082  | 1.784103  |
| C | -3.578341 | -0.319252 | 3.229761  |
| C | -2.877901 | -0.392799 | 4.363861  |
| S | -1.163448 | -0.013246 | 4.325073  |
| P | -5.322650 | -0.864567 | 3.038382  |
| N | -5.846872 | -0.735506 | 4.663672  |
| C | -6.016802 | 0.623512  | 2.180606  |
| C | -5.520016 | 1.924571  | 2.307559  |
| C | -6.147599 | 2.985463  | 1.664343  |
| C | -7.280266 | 2.760769  | 0.886984  |
| C | -7.781154 | 1.470960  | 0.747846  |
| C | -7.148075 | 0.410203  | 1.387637  |
| H | 2.245501  | -0.480997 | -0.967815 |

|   |           |           |          |
|---|-----------|-----------|----------|
| H | 3.561581  | -0.612264 | 1.227067 |
| H | -3.311868 | -0.676535 | 5.314272 |
| C | -5.960133 | 0.577738  | 5.305814 |
| C | -6.831255 | -1.738156 | 5.086455 |
| H | -7.529053 | -0.599011 | 1.263385 |
| H | -8.655997 | 1.289422  | 0.134713 |
| H | -7.766145 | 3.589075  | 0.384748 |
| H | -5.750105 | 3.988379  | 1.767057 |
| H | -4.632264 | 2.110925  | 2.902451 |
| H | -6.681014 | -1.945820 | 6.149887 |
| C | -8.283029 | -1.339269 | 4.829578 |
| H | -6.601795 | -2.663339 | 4.554146 |
| C | -5.984484 | 0.490122  | 6.827833 |
| H | -5.092651 | 1.166450  | 5.001759 |
| H | -6.846588 | 1.117732  | 4.945498 |
| H | -8.958208 | -2.142492 | 5.132641 |
| H | -8.558552 | -0.441849 | 5.388347 |
| H | -8.442868 | -1.136545 | 3.767244 |
| H | -5.920022 | 1.493303  | 7.253228 |
| H | -6.903077 | 0.032215  | 7.199957 |
| H | -5.137892 | -0.095213 | 7.195253 |

3b

44

scf done: -2590.7564057

|   |           |           |           |
|---|-----------|-----------|-----------|
| S | 0.753526  | 0.761610  | -0.050776 |
| C | 1.996876  | -0.489945 | 0.120108  |
| S | 1.348634  | -2.101794 | 0.459476  |
| C | -0.300283 | -1.664265 | 0.046015  |
| C | -0.589271 | -0.381062 | -0.181518 |
| C | 3.309581  | -0.234996 | 0.021740  |
| S | 3.952275  | 1.383101  | -0.310060 |
| C | 5.582721  | 0.813626  | -0.624830 |
| C | 5.851735  | -0.467682 | -0.388895 |
| S | 4.553942  | -1.481666 | 0.218661  |
| P | -2.185521 | 0.263513  | -0.811998 |
| N | -2.257583 | 1.687095  | 0.129831  |
| C | -2.044001 | 1.763002  | 1.576702  |
| C | -1.326808 | 3.037748  | 2.010958  |
| N | -3.235690 | -0.942769 | -0.207512 |
| C | -4.374114 | -1.294627 | -1.067060 |
| C | -4.130668 | -2.569990 | -1.868527 |
| C | -3.396571 | -1.249880 | 1.214126  |

|   |           |           |           |
|---|-----------|-----------|-----------|
| C | -3.690121 | -2.721698 | 1.493274  |
| C | -3.024369 | 2.795170  | -0.457266 |
| C | -2.137042 | 3.782507  | -1.208532 |
| H | 6.303452  | 1.540299  | -0.972286 |
| H | 6.821337  | -0.927419 | -0.518155 |
| H | -1.033225 | -2.458763 | -0.009209 |
| H | -3.576558 | 3.299566  | 0.342147  |
| H | -3.779722 | 2.396408  | -1.141743 |
| H | -3.004259 | 1.681357  | 2.106859  |
| H | -1.436660 | 0.906720  | 1.875964  |
| H | -5.268461 | -1.394043 | -0.442434 |
| H | -4.574114 | -0.472249 | -1.759961 |
| H | -2.473271 | -0.976607 | 1.725949  |
| H | -4.200198 | -0.633226 | 1.642974  |
| H | -1.159309 | 3.017080  | 3.090115  |
| H | -0.359530 | 3.117360  | 1.511599  |
| H | -1.912118 | 3.931145  | 1.783039  |
| H | -2.730196 | 4.594712  | -1.636894 |
| H | -1.382790 | 4.210409  | -0.546321 |
| H | -1.618533 | 3.266094  | -2.019563 |
| H | -4.993314 | -2.808540 | -2.496161 |
| H | -3.259982 | -2.436467 | -2.514788 |
| H | -3.935725 | -3.417805 | -1.209433 |
| H | -3.767855 | -2.884864 | 2.570406  |
| H | -4.630717 | -3.041511 | 1.040405  |
| H | -2.892546 | -3.360091 | 1.106641  |

3c

46

scf done: -2687.822176

|   |           |           |           |
|---|-----------|-----------|-----------|
| S | 0.095673  | 0.156157  | 0.095926  |
| C | 0.029883  | 0.098866  | 1.858590  |
| S | 1.622125  | 0.049724  | 2.618591  |
| C | 2.497426  | -0.347730 | 1.128277  |
| C | 1.806031  | -0.298957 | -0.014088 |
| C | -1.117430 | 0.107486  | 2.552197  |
| S | -2.711229 | 0.198285  | 1.783437  |
| C | -3.597988 | -0.288948 | 3.236356  |
| C | -2.892158 | -0.343600 | 4.368325  |
| S | -1.184136 | 0.062206  | 4.320402  |
| P | -5.334782 | -0.859946 | 3.056888  |
| N | -5.854326 | -0.727767 | 4.683672  |
| C | -6.055207 | 0.613446  | 2.194899  |

|   |           |           |           |
|---|-----------|-----------|-----------|
| C | -5.574004 | 1.921404  | 2.310074  |
| C | -6.220335 | 2.970491  | 1.666027  |
| C | -7.356543 | 2.726991  | 0.899586  |
| C | -7.842173 | 1.430109  | 0.772300  |
| C | -7.190285 | 0.381226  | 1.412805  |
| C | 2.300833  | -0.555867 | -1.405695 |
| C | 3.948788  | -0.671774 | 1.317575  |
| H | -3.318426 | -0.626185 | 5.322559  |
| C | -5.981514 | 0.587268  | 5.319017  |
| C | -6.821902 | -1.741176 | 5.118446  |
| H | -7.559569 | -0.633438 | 1.297745  |
| H | -8.719847 | 1.233869  | 0.167783  |
| H | -7.857112 | 3.546110  | 0.396693  |
| H | -5.834652 | 3.978914  | 1.759566  |
| H | -4.683777 | 2.122337  | 2.896449  |
| H | -6.661523 | -1.941629 | 6.181886  |
| C | -8.280806 | -1.363050 | 4.870265  |
| H | -6.584013 | -2.665819 | 4.588923  |
| C | -5.993413 | 0.508282  | 6.841688  |
| H | -5.124556 | 1.186304  | 5.005586  |
| H | -6.878097 | 1.112730  | 4.962150  |
| H | -8.942817 | -2.174714 | 5.179894  |
| H | -8.564922 | -0.468006 | 5.428569  |
| H | -8.450315 | -1.165285 | 3.808515  |
| H | -5.940586 | 1.514811  | 7.260784  |
| H | -6.902219 | 0.038987  | 7.223597  |
| H | -5.135452 | -0.062266 | 7.205987  |
| H | 2.074729  | 0.295021  | -2.053663 |
| H | 3.377289  | -0.716135 | -1.421053 |
| H | 1.814582  | -1.436844 | -1.831426 |
| H | 4.454228  | -0.801152 | 0.362340  |
| H | 4.451239  | 0.132129  | 1.861945  |
| H | 4.066510  | -1.590549 | 1.897060  |

3d

50

scf done: -2669.373754

|   |           |           |           |
|---|-----------|-----------|-----------|
| S | -0.115316 | 0.010884  | -0.007899 |
| C | -0.135463 | 0.052477  | 1.756828  |
| S | 1.476276  | 0.048247  | 2.476901  |
| C | 2.315017  | -0.426420 | 0.987920  |
| C | 1.594646  | -0.441673 | -0.137336 |
| C | -1.265200 | 0.097887  | 2.477306  |



|   |           |           |           |
|---|-----------|-----------|-----------|
| S | -1.281991 | 0.153197  | 4.247235  |
| C | -2.997023 | -0.201537 | 4.367635  |
| C | -3.733848 | -0.207489 | 3.254410  |
| S | -2.879267 | 0.137053  | 1.745099  |
| P | -5.484787 | -0.734846 | 3.130189  |
| N | -5.998872 | -0.379824 | 4.722939  |
| N | -6.018769 | 0.452972  | 2.025203  |
| C | 2.055276  | -0.774057 | -1.524792 |
| C | 3.772298  | -0.735146 | 1.155898  |
| H | -3.402385 | -0.403265 | 5.350778  |
| C | -7.161002 | 0.067382  | 1.185523  |
| C | -5.757375 | 1.890662  | 2.117751  |
| C | -5.980670 | 0.965357  | 5.298332  |
| C | -6.977072 | -1.306990 | 5.306779  |
| H | -7.804861 | 0.942221  | 1.049915  |
| C | -6.727819 | -0.498909 | -0.162925 |
| H | -7.768810 | -0.676437 | 1.710632  |
| C | -5.512379 | 2.545012  | 0.761231  |
| H | -6.592622 | 2.396002  | 2.624550  |
| H | -4.869911 | 2.036130  | 2.736489  |
| H | -7.756087 | -0.725578 | 5.812282  |
| H | -7.477206 | -1.858533 | 4.505454  |
| C | -6.337515 | -2.303978 | 6.268671  |
| C | -5.725919 | 0.984843  | 6.803319  |
| H | -5.190812 | 1.533172  | 4.805468  |
| H | -6.930474 | 1.477932  | 5.085339  |
| H | -5.288939 | 3.605344  | 0.898785  |
| H | -4.664401 | 2.074446  | 0.260592  |
| H | -6.386806 | 2.471740  | 0.111025  |
| H | -7.595121 | -0.774922 | -0.768516 |
| H | -6.130008 | 0.227284  | -0.715903 |
| H | -6.115444 | -1.390033 | -0.007192 |
| H | -7.088689 | -2.975873 | 6.692165  |
| H | -5.597642 | -2.905305 | 5.735261  |
| H | -5.829409 | -1.791328 | 7.087276  |
| H | -5.690807 | 2.017126  | 7.158328  |
| H | -6.514388 | 0.470211  | 7.356142  |
| H | -4.773874 | 0.506700  | 7.044621  |
| H | 4.251382  | -0.921284 | 0.196423  |
| H | 4.286751  | 0.100972  | 1.636823  |
| H | 3.909266  | -1.617241 | 1.785952  |
| H | 1.784306  | 0.026142  | -2.218434 |
| H | 3.135370  | -0.903318 | -1.564147 |
| H | 1.583662  | -1.694338 | -1.877602 |

4a

26

scf done: -2856.263612

|    |           |           |           |
|----|-----------|-----------|-----------|
| C  | 0.377147  | -0.544087 | 0.287411  |
| S  | 0.767787  | -0.460383 | 2.012302  |
| C  | 2.341418  | 0.273428  | 1.754367  |
| C  | 2.656772  | 0.650628  | 0.518472  |
| S  | 1.473627  | 0.381281  | -0.749835 |
| H  | 3.580397  | 1.137346  | 0.238906  |
| H  | 2.972235  | 0.410122  | 2.621254  |
| C  | -0.664642 | -1.240173 | -0.190632 |
| S  | -1.092707 | -1.287783 | -1.906945 |
| C  | -2.085927 | -2.749668 | -1.744590 |
| C  | -2.393450 | -3.122940 | -0.500409 |
| S  | -1.770921 | -2.167397 | 0.833915  |
| H  | -3.020747 | -3.969460 | -0.254587 |
| P  | -2.426863 | -3.647986 | -3.303131 |
| Cl | -4.131581 | -4.708054 | -2.678710 |
| C  | -3.210064 | -2.279749 | -4.238167 |
| C  | -2.860144 | -2.142629 | -5.581199 |
| C  | -3.410403 | -1.115832 | -6.344616 |
| C  | -4.311208 | -0.231505 | -5.765422 |
| C  | -4.665492 | -0.366788 | -4.423055 |
| C  | -4.116191 | -1.385738 | -3.659989 |
| H  | -2.157774 | -2.837260 | -6.029935 |
| H  | -3.135544 | -1.010068 | -7.387048 |
| H  | -4.740116 | 0.568047  | -6.357938 |
| H  | -5.366403 | 0.326703  | -3.974281 |
| H  | -4.383106 | -1.493398 | -2.613385 |

4b

30

scf done: -2837.825998

|   |           |           |           |
|---|-----------|-----------|-----------|
| S | 0.012955  | -0.029593 | 0.003106  |
| C | 0.006587  | -0.034707 | 1.774112  |
| S | 1.620119  | -0.017350 | 2.504147  |
| C | 2.440144  | 0.360955  | 0.998969  |
| C | 1.720871  | 0.356613  | -0.119960 |
| C | -1.120507 | -0.056525 | 2.500200  |
| S | -1.130569 | -0.101425 | 4.269919  |
| C | -2.834331 | 0.374432  | 4.402610  |
| C | -3.543557 | 0.373291  | 3.271885  |

|    |           |           |           |
|----|-----------|-----------|-----------|
| S  | -2.738528 | -0.072909 | 1.780369  |
| P  | -3.326137 | 0.962499  | 6.065978  |
| Cl | -5.443813 | 0.662627  | 5.815834  |
| N  | -2.796563 | -0.344690 | 6.961213  |
| C  | -2.469745 | -0.098714 | 8.372692  |
| C  | -1.221138 | -0.857695 | 8.804320  |
| C  | -3.061535 | -1.744302 | 6.592989  |
| C  | -4.125898 | -2.405699 | 7.463967  |
| H  | 2.116145  | 0.545613  | -1.107992 |
| H  | 3.502330  | 0.554593  | 1.048381  |
| H  | -4.599167 | 0.603908  | 3.216379  |
| H  | -2.304015 | 0.974468  | 8.487978  |
| H  | -3.317919 | -0.364110 | 9.013613  |
| H  | -2.121347 | -2.301939 | 6.640403  |
| H  | -3.383306 | -1.757033 | 5.550650  |
| H  | -0.943153 | -0.567800 | 9.819184  |
| H  | -1.382227 | -1.937614 | 8.799918  |
| H  | -0.389042 | -0.629861 | 8.134765  |
| H  | -4.349414 | -3.399589 | 7.071671  |
| H  | -3.792320 | -2.525519 | 8.496974  |
| H  | -5.044652 | -1.816602 | 7.458095  |

4c

32

scf done: -2934.881297

|    |           |           |           |
|----|-----------|-----------|-----------|
| C  | 0.002704  | -0.004658 | 0.020457  |
| C  | 0.000114  | -0.006574 | 1.418490  |
| C  | 1.207941  | -0.036465 | 2.115103  |
| C  | 2.414446  | -0.063236 | 1.419896  |
| C  | 2.410979  | -0.062880 | 0.030951  |
| C  | 1.205057  | -0.034553 | -0.669379 |
| P  | -1.540213 | 0.038975  | 2.411531  |
| Cl | -2.468147 | -1.728878 | 1.750607  |
| C  | -2.483810 | 1.233423  | 1.394987  |
| S  | -1.717006 | 2.818215  | 1.168923  |
| C  | -3.222142 | 3.611990  | 0.681339  |
| S  | -4.461146 | 2.478271  | 0.119369  |
| C  | -3.716940 | 1.095130  | 0.902554  |
| C  | -3.393791 | 4.941519  | 0.707331  |
| S  | -4.871940 | 5.735006  | 0.163631  |
| C  | -4.466789 | 7.319183  | 0.849418  |
| C  | -3.235537 | 7.469543  | 1.345916  |
| S  | -2.154325 | 6.066714  | 1.262125  |

|   |           |           |           |
|---|-----------|-----------|-----------|
| C | -2.626599 | 8.697685  | 1.952720  |
| C | -5.563277 | 8.338296  | 0.769567  |
| H | -4.286907 | 0.176132  | 0.935135  |
| H | 1.205385  | -0.038213 | 3.200109  |
| H | 3.351403  | -0.084479 | 1.963118  |
| H | 3.348817  | -0.083004 | -0.511645 |
| H | 1.206730  | -0.031179 | -1.752724 |
| H | -0.939245 | 0.023131  | -0.518175 |
| H | -5.220244 | 9.316108  | 1.102379  |
| H | -5.919899 | 8.435434  | -0.259127 |
| H | -6.411957 | 8.041050  | 1.390128  |
| H | -1.695912 | 8.955163  | 1.440505  |
| H | -3.299521 | 9.550076  | 1.880976  |
| H | -2.392226 | 8.531513  | 3.006835  |

4d

36

scf done: -2916.443611

|    |           |           |           |
|----|-----------|-----------|-----------|
| S  | 0.011969  | -0.057646 | -0.000170 |
| C  | 0.007101  | -0.053467 | 1.763895  |
| S  | 1.623033  | -0.048257 | 2.471509  |
| C  | 2.459719  | 0.355092  | 0.961108  |
| C  | 1.729947  | 0.352516  | -0.158057 |
| C  | -1.115307 | -0.069581 | 2.497044  |
| S  | -1.115554 | -0.115515 | 4.267211  |
| C  | -2.813158 | 0.379982  | 4.408988  |
| C  | -3.529687 | 0.382271  | 3.282734  |
| S  | -2.739029 | -0.079472 | 1.788378  |
| P  | -3.287154 | 0.977622  | 6.073270  |
| Cl | -5.411303 | 0.707366  | 5.837811  |
| C  | 3.925023  | 0.634780  | 1.109199  |
| C  | 2.184725  | 0.627896  | -1.559692 |
| N  | -2.771960 | -0.335220 | 6.968771  |
| C  | -2.432215 | -0.092444 | 8.377318  |
| C  | -1.186175 | -0.861490 | 8.798583  |
| C  | -3.054837 | -1.731582 | 6.602637  |
| C  | -4.122381 | -2.380230 | 7.479355  |
| H  | -4.583111 | 0.623984  | 3.233485  |
| H  | -2.257466 | 0.979366  | 8.491989  |
| H  | -3.277216 | -0.351635 | 9.024918  |
| H  | -2.121044 | -2.300244 | 6.645106  |
| H  | -3.381996 | -1.740959 | 5.562033  |
| H  | -0.897109 | -0.574262 | 9.811106  |

|   |           |           |           |
|---|-----------|-----------|-----------|
| H | -1.356169 | -1.940051 | 8.795247  |
| H | -0.358214 | -0.640452 | 8.121682  |
| H | -4.361572 | -3.370510 | 7.087200  |
| H | -3.784237 | -2.505904 | 8.510182  |
| H | -5.033152 | -1.778850 | 7.479897  |
| H | 3.263271  | 0.765965  | -1.606454 |
| H | 1.919745  | -0.204060 | -2.217304 |
| H | 1.704676  | 1.528011  | -1.950913 |
| H | 4.401941  | 0.772913  | 0.140701  |
| H | 4.087239  | 1.536193  | 1.704894  |
| H | 4.422415  | -0.195197 | 1.617706  |

cis-5b

56

scf done: -4753.994643

|   |           |           |           |
|---|-----------|-----------|-----------|
| C | 7.064724  | 0.396488  | 0.978873  |
| S | 5.864490  | 1.283825  | 0.053924  |
| C | 4.938295  | -0.162347 | -0.377088 |
| S | 5.772438  | -1.685826 | -0.036634 |
| C | 7.023635  | -0.932354 | 0.937894  |
| C | 3.712791  | -0.106841 | -0.920899 |
| S | 2.759200  | -1.530681 | -1.340681 |
| C | 1.212264  | -0.684283 | -1.110913 |
| C | 1.255711  | 0.654209  | -1.066925 |
| S | 2.859890  | 1.403963  | -1.246822 |
| P | -0.230496 | -1.827393 | -1.115014 |
| C | -1.509647 | -0.633402 | -0.571530 |
| S | -2.987343 | -1.411587 | 0.034882  |
| C | -3.906648 | 0.096486  | 0.090875  |
| S | -2.880296 | 1.533279  | 0.151741  |
| C | -1.463832 | 0.702625  | -0.523866 |
| C | -5.246432 | 0.143420  | 0.117731  |
| S | -6.260574 | -1.308582 | 0.087216  |
| C | -7.744836 | -0.423048 | -0.220782 |
| C | -7.698499 | 0.905383  | -0.172099 |
| S | -6.156881 | 1.660719  | 0.195857  |
| P | -0.133133 | 1.856769  | -1.039981 |
| N | 0.091705  | 2.702112  | 0.404957  |
| C | 0.285582  | 2.050127  | 1.699737  |
| C | 1.684516  | 2.216956  | 2.285375  |
| H | -8.638004 | -1.002864 | -0.408978 |
| H | -8.548687 | 1.558125  | -0.315202 |
| H | 7.724712  | -1.587214 | 1.436933  |

|   |           |           |           |
|---|-----------|-----------|-----------|
| H | 7.804004  | 0.974848  | 1.515828  |
| N | -0.045441 | -2.719591 | 0.306695  |
| C | 0.085065  | -2.134602 | 1.641716  |
| C | 1.519037  | -1.788947 | 2.041444  |
| C | 0.080529  | -4.175540 | 0.225958  |
| C | -1.229039 | -4.890321 | 0.540548  |
| C | 0.214601  | 4.160846  | 0.357739  |
| C | 1.559873  | 4.657344  | -0.164614 |
| H | 0.871223  | -4.492869 | 0.914553  |
| H | 0.420927  | -4.446164 | -0.776347 |
| H | -1.611697 | -4.600306 | 1.521794  |
| H | -1.095319 | -5.974878 | 0.535354  |
| H | -1.986601 | -4.632886 | -0.203362 |
| H | -0.339479 | -2.848082 | 2.355378  |
| H | -0.547121 | -1.244389 | 1.701526  |
| H | 1.554646  | -1.504561 | 3.096581  |
| H | 1.909368  | -0.954661 | 1.455193  |
| H | 2.187700  | -2.640448 | 1.895555  |
| H | -0.590962 | 4.567943  | -0.260923 |
| H | 0.039182  | 4.530138  | 1.372752  |
| H | 1.699418  | 4.355171  | -1.206179 |
| H | 2.388628  | 4.247461  | 0.414940  |
| H | 1.609670  | 5.748657  | -0.125650 |
| H | -0.465453 | 2.437186  | 2.399446  |
| H | 0.069391  | 0.986188  | 1.573383  |
| H | 1.760678  | 1.670160  | 3.228648  |
| H | 1.908691  | 3.265852  | 2.494232  |
| H | 2.444739  | 1.834372  | 1.601153  |

cis-5d

68

scf done: -4911.253570

|   |           |           |           |
|---|-----------|-----------|-----------|
| S | -2.925457 | -1.451112 | 0.115727  |
| S | -2.851711 | 1.493838  | 0.244628  |
| S | -6.201184 | -1.379380 | 0.299742  |
| S | -6.131989 | 1.566663  | 0.420182  |
| S | 2.753552  | -1.486127 | -1.527381 |
| S | 2.817536  | 1.448760  | -1.433174 |
| S | 5.832834  | -1.587685 | -0.359912 |
| S | 5.884003  | 1.360371  | -0.271648 |
| P | -0.219588 | -1.823430 | -1.164680 |
| P | -0.167235 | 1.859607  | -1.072915 |
| N | 0.041149  | -2.725446 | 0.239385  |

|   |           |           |           |
|---|-----------|-----------|-----------|
| N | 0.119222  | 2.699625  | 0.364805  |
| C | -1.486641 | -0.650550 | -0.552488 |
| C | -3.862466 | 0.044420  | 0.215400  |
| C | -1.456320 | 0.685849  | -0.499775 |
| C | -5.200580 | 0.073693  | 0.293469  |
| C | -7.726600 | -0.524169 | 0.005955  |
| C | -7.695359 | 0.810437  | 0.060656  |
| C | -8.907541 | -1.412165 | -0.247593 |
| H | -8.781385 | -1.964465 | -1.181825 |
| H | -9.829583 | -0.837218 | -0.310357 |
| H | -9.016319 | -2.141967 | 0.558964  |
| C | -8.832928 | 1.770576  | -0.116368 |
| H | -8.909552 | 2.434633  | 0.748586  |
| H | -9.780628 | 1.246615  | -0.225806 |
| H | -8.678672 | 2.392522  | -1.001302 |
| C | 1.207546  | -0.662497 | -1.220570 |
| C | 3.705507  | -0.049906 | -1.145392 |
| C | 1.234415  | 0.676658  | -1.175562 |
| C | 4.954379  | -0.088150 | -0.656291 |
| C | 7.131315  | -0.830933 | 0.581220  |
| C | 7.154743  | 0.504274  | 0.621439  |
| C | 8.091739  | -1.792575 | 1.213927  |
| H | 7.589744  | -2.394746 | 1.974976  |
| H | 8.923987  | -1.270949 | 1.682815  |
| H | 8.498066  | -2.475130 | 0.463029  |
| C | 8.147419  | 1.392290  | 1.309457  |
| H | 8.580262  | 2.102106  | 0.599746  |
| H | 8.958935  | 0.814432  | 1.747780  |
| H | 7.665599  | 1.967139  | 2.103951  |
| C | 0.188820  | -4.178248 | 0.138687  |
| H | 1.020100  | -4.486950 | 0.781956  |
| H | 0.477555  | -4.432963 | -0.883822 |
| C | -1.090095 | -4.919214 | 0.516397  |
| H | -1.420978 | -4.643494 | 1.520271  |
| H | -0.936901 | -6.000776 | 0.491327  |
| H | -1.889375 | -4.664592 | -0.183424 |
| C | 0.227192  | -2.149813 | 1.572141  |
| H | -0.158501 | -2.872816 | 2.298219  |
| H | -0.407126 | -1.263959 | 1.665685  |
| C | 1.676183  | -1.796714 | 1.908988  |
| H | 1.754245  | -1.513120 | 2.961965  |
| H | 2.033536  | -0.960484 | 1.304436  |
| H | 2.339561  | -2.646504 | 1.732023  |
| C | 0.214575  | 4.160796  | 0.322474  |

|   |           |          |           |
|---|-----------|----------|-----------|
| H | -0.628275 | 4.557924 | -0.251488 |
| H | 0.088356  | 4.519152 | 1.348593  |
| C | 1.522680  | 4.683523 | -0.266720 |
| H | 1.610793  | 4.383891 | -1.314572 |
| H | 2.385526  | 4.285007 | 0.269446  |
| H | 1.552801  | 5.775375 | -0.225938 |
| C | 0.389633  | 2.041452 | 1.643030  |
| H | -0.328451 | 2.413787 | 2.384239  |
| H | 0.184181  | 0.975086 | 1.518051  |
| C | 1.815699  | 2.225392 | 2.155899  |
| H | 1.945791  | 1.675973 | 3.091634  |
| H | 2.032992  | 3.277578 | 2.355308  |
| H | 2.542230  | 1.855171 | 1.429228  |

*cis-6b*

58

scf done: -4904.515185

|   |           |           |           |
|---|-----------|-----------|-----------|
| C | -7.155216 | -0.418639 | 0.796745  |
| S | -5.894148 | -1.305989 | -0.042384 |
| C | -4.957160 | 0.141041  | -0.441285 |
| S | -5.810482 | 1.662456  | -0.148791 |
| C | -7.117711 | 0.909893  | 0.749045  |
| C | -3.709012 | 0.087185  | -0.930937 |
| S | -2.745514 | 1.516397  | -1.326239 |
| C | -1.220972 | 0.675483  | -1.004447 |
| C | -1.261931 | -0.663109 | -0.949574 |
| S | -2.840244 | -1.425480 | -1.221423 |
| P | 0.209425  | 1.776309  | -0.792600 |
| C | 1.553700  | 0.644413  | -0.351864 |
| S | 3.034551  | 1.431416  | 0.203990  |
| C | 3.961859  | -0.075319 | 0.200431  |
| S | 2.949395  | -1.521867 | 0.303450  |
| C | 1.515270  | -0.695521 | -0.311258 |
| C | 5.300706  | -0.116290 | 0.127432  |
| S | 6.301890  | 1.338675  | 0.029887  |
| C | 7.768811  | 0.462853  | -0.371595 |
| C | 7.731307  | -0.865761 | -0.327353 |
| S | 6.217973  | -1.628631 | 0.129176  |
| P | 0.130484  | -1.804920 | -0.717199 |
| N | -0.136332 | -2.636589 | 0.688655  |
| C | -0.390045 | -1.947981 | 1.952942  |
| C | -1.819980 | -2.099547 | 2.462021  |
| H | 8.644381  | 1.048721  | -0.612792 |



|   |           |           |           |
|---|-----------|-----------|-----------|
| H | 8.571969  | -1.514863 | -0.527256 |
| H | -7.851659 | 1.565127  | 1.196436  |
| H | -7.923957 | -0.997607 | 1.288650  |
| N | -0.008473 | 2.651537  | 0.597617  |
| C | -0.122279 | 2.037883  | 1.921044  |
| C | -1.544234 | 1.609670  | 2.283257  |
| C | -0.338041 | 4.081828  | 0.502429  |
| C | 0.870599  | 4.952296  | 0.822055  |
| C | -0.235858 | -4.104454 | 0.658058  |
| C | -1.551535 | -4.624825 | 0.088345  |
| H | -1.167840 | 4.284601  | 1.186565  |
| H | -0.689008 | 4.295347  | -0.507711 |
| H | 1.278555  | 4.717129  | 1.808092  |
| H | 0.598125  | 6.009932  | 0.808532  |
| H | 1.649473  | 4.783594  | 0.076128  |
| H | 0.248283  | 2.767715  | 2.646736  |
| H | 0.564808  | 1.188246  | 1.977314  |
| H | -1.577547 | 1.244163  | 3.312671  |
| H | -1.901931 | 0.812849  | 1.626289  |
| H | -2.238012 | 2.448569  | 2.196438  |
| H | 0.595965  | -4.499221 | 0.071731  |
| H | -0.095542 | -4.440399 | 1.689526  |
| H | -1.625529 | -4.361223 | -0.968617 |
| H | -2.409430 | -4.202998 | 0.615071  |
| H | -1.591167 | -5.713813 | 0.168757  |
| H | 0.323566  | -2.319689 | 2.697135  |
| H | -0.162581 | -0.887069 | 1.812480  |
| H | -1.950396 | -1.530870 | 3.385582  |
| H | -2.050400 | -3.145197 | 2.676937  |
| H | -2.537170 | -1.735528 | 1.722197  |
| O | 0.413215  | 2.639058  | -1.977763 |
| O | 0.352739  | -2.702960 | -1.872165 |

*cis-7b*

58

scf done: -5550.443402

|   |          |           |           |
|---|----------|-----------|-----------|
| C | 7.041207 | -0.407806 | -1.137658 |
| S | 5.848998 | -1.287560 | -0.196016 |
| C | 4.934292 | 0.161475  | 0.245558  |
| S | 5.758476 | 1.681616  | -0.126248 |
| C | 7.000878 | 0.921118  | -1.105867 |
| C | 3.722652 | 0.109407  | 0.819908  |
| S | 2.775003 | 1.537366  | 1.253846  |

|   |           |           |           |
|---|-----------|-----------|-----------|
| C | 1.245542  | 0.690027  | 0.954383  |
| C | 1.290992  | -0.648811 | 0.913091  |
| S | 2.877244  | -1.401337 | 1.179123  |
| P | -0.195708 | 1.783673  | 0.767515  |
| C | -1.510549 | 0.637279  | 0.262865  |
| S | -2.973674 | 1.417601  | -0.349867 |
| C | -3.890045 | -0.094953 | -0.389196 |
| S | -2.868483 | -1.537328 | -0.446936 |
| C | -1.464503 | -0.701602 | 0.224587  |
| C | -5.230549 | -0.142464 | -0.378077 |
| S | -6.241805 | 1.308016  | -0.327269 |
| C | -7.719361 | 0.425848  | 0.017714  |
| C | -7.673984 | -0.902645 | -0.023640 |
| S | -6.140304 | -1.658824 | -0.419908 |
| P | -0.096029 | -1.804798 | 0.707001  |
| N | 0.211149  | -2.657709 | -0.688333 |
| C | 0.445715  | -1.945153 | -1.948332 |
| C | 1.868706  | -2.074898 | -2.481632 |
| H | -8.606453 | 1.007878  | 0.223506  |
| H | -8.518878 | -1.555475 | 0.143669  |
| H | 7.697539  | 1.572652  | -1.614149 |
| H | 7.775445  | -0.990861 | -1.675317 |
| N | 0.035409  | 2.682205  | -0.615492 |
| C | 0.180681  | 2.050714  | -1.931856 |
| C | 1.616369  | 1.657548  | -2.277257 |
| C | 0.296860  | 4.127901  | -0.568564 |
| C | -0.961710 | 4.931058  | -0.869802 |
| C | 0.344844  | -4.121480 | -0.701230 |
| C | 1.696578  | -4.632864 | -0.211863 |
| H | 1.088533  | 4.342805  | -1.292504 |
| H | 0.683761  | 4.391499  | 0.415564  |
| H | -1.394110 | 4.639321  | -1.830104 |
| H | -0.738585 | 5.999795  | -0.904508 |
| H | -1.703520 | 4.754310  | -0.088586 |
| H | -0.203526 | 2.763022  | -2.667712 |
| H | -0.481905 | 1.182711  | -1.987138 |
| H | 1.670291  | 1.309354  | -3.311830 |
| H | 1.981089  | 0.857008  | -1.629119 |
| H | 2.291609  | 2.508792  | -2.167253 |
| H | -0.452621 | -4.551509 | -0.092980 |
| H | 0.163595  | -4.430597 | -1.734915 |
| H | 1.817220  | -4.414143 | 0.850520  |
| H | 2.521492  | -4.168992 | -0.754584 |
| H | 1.754760  | -5.716130 | -0.343874 |

|   |           |           |           |
|---|-----------|-----------|-----------|
| H | -0.276358 | -2.311732 | -2.687038 |
| H | 0.215378  | -0.888245 | -1.790400 |
| H | 1.979585  | -1.472579 | -3.386280 |
| H | 2.101933  | -3.110002 | -2.738782 |
| H | 2.595205  | -1.730943 | -1.741372 |
| S | -0.526773 | 2.829764  | 2.366834  |
| S | -0.428619 | -2.894360 | 2.274906  |

*cis*-8b

58

scf done: -9557.182015

|    |           |           |           |
|----|-----------|-----------|-----------|
| S  | -6.077262 | -1.666949 | -0.730321 |
| C  | -5.170152 | -0.149301 | -0.679817 |
| S  | -6.183910 | 1.299943  | -0.645776 |
| C  | -7.665219 | 0.416621  | -0.320879 |
| C  | -7.617512 | -0.911878 | -0.358584 |
| C  | -3.829659 | -0.099890 | -0.673514 |
| S  | -2.916487 | 1.414327  | -0.626282 |
| C  | -1.459150 | 0.637520  | 0.004838  |
| C  | -1.410737 | -0.701741 | -0.029712 |
| S  | -2.805737 | -1.541101 | -0.715692 |
| P  | -0.153000 | 1.785358  | 0.526005  |
| Se | -0.535385 | 2.888556  | 2.264119  |
| P  | -0.046397 | -1.799421 | 0.473285  |
| Se | -0.425206 | -2.946302 | 2.181889  |
| C  | 1.288758  | 0.696993  | 0.727831  |
| S  | 2.813754  | 1.546306  | 1.046026  |
| C  | 3.765540  | 0.120227  | 0.614487  |
| S  | 2.921584  | -1.391538 | 0.973534  |
| C  | 1.336652  | -0.642400 | 0.689269  |
| C  | 4.979513  | 0.174296  | 0.045294  |
| S  | 5.899648  | -1.273094 | -0.390361 |
| C  | 7.096590  | -0.391566 | -1.324212 |
| C  | 7.053200  | 0.937285  | -1.293822 |
| S  | 5.802144  | 1.695970  | -0.323922 |
| N  | 0.088623  | 2.692465  | -0.851002 |
| C  | 0.338330  | 4.140519  | -0.806340 |
| C  | -0.918302 | 4.933523  | -1.140385 |
| N  | 0.278919  | -2.662969 | -0.912861 |
| C  | 0.414195  | -4.126843 | -0.925538 |
| C  | 1.769255  | -4.636432 | -0.443936 |
| C  | 0.517757  | -1.950770 | -2.173934 |
| C  | 1.943134  | -2.076861 | -2.701623 |

|   |           |           |           |
|---|-----------|-----------|-----------|
| C | 0.255112  | 2.058274  | -2.165146 |
| C | 1.696333  | 1.668849  | -2.491248 |
| H | -8.555944 | 0.997978  | -0.129395 |
| H | -8.463895 | -1.565482 | -0.202161 |
| H | 7.751956  | 1.589920  | -1.797800 |
| H | 7.835743  | -0.973536 | -1.856282 |
| H | 1.145157  | 4.356585  | -1.513079 |
| H | 0.700397  | 4.411696  | 0.185156  |
| H | -1.328908 | 4.633302  | -2.107614 |
| H | -0.699753 | 6.003111  | -1.177758 |
| H | -1.675377 | 4.758681  | -0.373392 |
| H | -0.121000 | 2.769090  | -2.906422 |
| H | -0.403875 | 1.188124  | -2.228342 |
| H | 1.764055  | 1.325275  | -3.526572 |
| H | 2.053603  | 0.865725  | -1.842213 |
| H | 2.368829  | 2.520581  | -2.368981 |
| H | -0.379049 | -4.557116 | -0.311809 |
| H | 0.226574  | -4.436438 | -1.958003 |
| H | 1.897954  | -4.411508 | 0.616233  |
| H | 2.591233  | -4.177920 | -0.995420 |
| H | 1.824215  | -5.720630 | -0.569707 |
| H | -0.200507 | -2.320867 | -2.914543 |
| H | 0.284339  | -0.894223 | -2.018579 |
| H | 2.055575  | -1.470306 | -3.603284 |
| H | 2.179064  | -3.110269 | -2.962687 |
| H | 2.666304  | -1.734320 | -1.957405 |

cis-1,4-dichloro-1,4-dihydro-1,4-diphosphinines

40

scf done: -5405.353394

|   |          |          |           |
|---|----------|----------|-----------|
| C | 3.919294 | 7.124534 | 1.205395  |
| C | 2.598308 | 7.352075 | 1.256104  |
| P | 1.394217 | 6.869774 | -0.029802 |
| C | 2.457566 | 7.146704 | -1.488777 |
| C | 3.778553 | 6.919172 | -1.539490 |
| P | 4.793755 | 6.284178 | -0.160302 |
| S | 4.556125 | 7.045751 | -3.123953 |
| C | 3.019513 | 7.014728 | -3.999552 |
| S | 1.651278 | 7.546103 | -3.012444 |
| S | 1.948166 | 7.979314 | 2.777637  |
| C | 3.413710 | 7.589922 | 3.688334  |
| S | 4.853011 | 7.478943 | 2.666125  |

|    |          |          |           |
|----|----------|----------|-----------|
| C  | 3.437789 | 7.432879 | 5.020217  |
| C  | 2.909194 | 6.661568 | -5.288840 |
| Cl | 6.443699 | 7.573876 | -0.341391 |
| S  | 4.283918 | 6.170771 | -6.275645 |
| S  | 1.380067 | 6.670952 | -6.164181 |
| S  | 4.909448 | 7.083522 | 5.923934  |
| S  | 2.005601 | 7.583723 | 6.035410  |
| C  | 2.765926 | 6.919130 | 7.492384  |
| C  | 4.081496 | 6.692515 | 7.441879  |
| C  | 4.973298 | 6.167179 | 8.526366  |
| H  | 4.428957 | 6.044539 | 9.460737  |
| H  | 5.803893 | 6.854967 | 8.704460  |
| H  | 5.395316 | 5.199829 | 8.244009  |
| C  | 1.833229 | 6.708062 | 8.646908  |
| H  | 1.295770 | 7.631451 | 8.877442  |
| H  | 2.373297 | 6.398748 | 9.539683  |
| H  | 1.092564 | 5.940916 | 8.409226  |
| C  | 1.993297 | 5.791717 | -7.576073 |
| C  | 3.308869 | 5.565111 | -7.626571 |
| C  | 4.089714 | 4.877867 | -8.706097 |
| H  | 3.454114 | 4.622073 | -9.551661 |
| H  | 4.545596 | 3.959944 | -8.327706 |
| H  | 4.892641 | 5.525257 | -9.067830 |
| C  | 0.949643 | 5.418731 | -8.585563 |
| H  | 0.384510 | 6.301739 | -8.894720 |
| H  | 0.242854 | 4.701017 | -8.162565 |
| H  | 1.398444 | 4.976234 | -9.472789 |
| Cl | 0.261391 | 8.638848 | -0.104080 |

trans-1,4-dichloro-1,4-dihydro-1,4-diphosphinines

40

scf done: -5405.354451

|   |          |          |           |
|---|----------|----------|-----------|
| C | 3.812196 | 6.990922 | 1.202689  |
| C | 2.485681 | 7.189546 | 1.260759  |
| P | 1.247067 | 6.932589 | -0.050999 |
| C | 2.347197 | 6.978566 | -1.503062 |
| C | 3.674384 | 6.780970 | -1.547728 |
| P | 4.656146 | 6.119538 | -0.159756 |
| S | 4.466121 | 6.957607 | -3.114235 |
| C | 2.942241 | 6.936263 | -4.015044 |
| S | 1.546966 | 7.387117 | -3.027394 |
| S | 1.837835 | 7.830205 | 2.777560  |
| C | 3.327749 | 7.523524 | 3.678466  |

|    |          |          |           |
|----|----------|----------|-----------|
| S  | 4.754345 | 7.396669 | 2.637860  |
| C  | 3.379712 | 7.425080 | 5.014897  |
| C  | 2.861863 | 6.636192 | -5.319628 |
| Cl | 6.354109 | 7.341602 | -0.338121 |
| Cl | 0.989299 | 4.848529 | 0.121005  |
| S  | 4.260325 | 6.200172 | -6.298694 |
| S  | 1.349143 | 6.661825 | -6.222418 |
| S  | 4.871825 | 7.131675 | 5.904782  |
| S  | 1.964045 | 7.598567 | 6.049206  |
| C  | 2.756300 | 6.988564 | 7.513489  |
| C  | 4.073816 | 6.777361 | 7.448108  |
| C  | 4.989597 | 6.296095 | 8.532981  |
| H  | 4.462946 | 6.198942 | 9.480387  |
| H  | 5.816270 | 6.997110 | 8.673848  |
| H  | 5.416135 | 5.324084 | 8.274457  |
| C  | 1.845188 | 6.799980 | 8.688852  |
| H  | 1.298144 | 7.722362 | 8.900104  |
| H  | 2.403632 | 6.525507 | 9.581713  |
| H  | 1.112101 | 6.015685 | 8.486284  |
| C  | 1.996501 | 5.830851 | -7.648702 |
| C  | 3.315561 | 5.622022 | -7.683380 |
| C  | 4.122482 | 4.974489 | -8.768185 |
| H  | 3.505702 | 4.741985 | -9.634163 |
| H  | 4.576948 | 4.047873 | -8.409810 |
| H  | 4.927991 | 5.638092 | -9.092872 |
| C  | 0.974518 | 5.472855 | -8.685309 |
| H  | 0.400690 | 6.356141 | -8.977185 |
| H  | 0.272503 | 4.732403 | -8.294819 |
| H  | 1.443676 | 5.063721 | -9.578005 |

trans-10

38

scf done: -4484.921523

|   |          |           |           |
|---|----------|-----------|-----------|
| C | 0.115220 | 0.026220  | 0.215820  |
| S | 0.122319 | -0.092104 | 1.984253  |
| C | 1.878164 | -0.096799 | 2.141826  |
| S | 2.721914 | -0.333747 | 0.612191  |
| C | 1.292707 | -0.083235 | -0.405656 |
| C | 2.510783 | 0.039208  | 3.316468  |
| S | 1.677182 | 0.237884  | 4.856879  |
| C | 3.048823 | 1.038091  | 5.657579  |
| C | 4.276968 | 0.923928  | 5.009378  |
| S | 4.264328 | -0.002534 | 3.491370  |

|   |           |           |           |
|---|-----------|-----------|-----------|
| P | 5.839882  | 1.507940  | 5.512126  |
| C | 5.471003  | 2.271633  | 7.034352  |
| C | 4.242818  | 2.385935  | 7.682477  |
| S | 4.255458  | 3.312532  | 9.200412  |
| C | 6.008969  | 3.270482  | 9.375491  |
| S | 6.842683  | 3.071678  | 7.835153  |
| P | 2.679932  | 1.801849  | 7.179786  |
| C | 6.641503  | 3.406342  | 10.550197 |
| S | 5.797662  | 3.643321  | 12.079776 |
| C | 7.226708  | 3.392301  | 13.097720 |
| C | 8.404235  | 3.282710  | 12.476341 |
| S | 8.397330  | 3.401373  | 10.707933 |
| C | 9.759750  | 3.092927  | 13.087911 |
| C | 6.949984  | 3.354445  | 14.570625 |
| C | 1.569276  | -0.045587 | -1.878595 |
| C | -1.240401 | 0.215547  | -0.395656 |
| H | 7.872714  | 3.299504  | 15.145067 |
| H | 6.333806  | 2.488872  | 14.825096 |
| H | 6.409164  | 4.252202  | 14.880913 |
| H | 10.443562 | 3.876666  | 12.751924 |
| H | 10.184461 | 2.130443  | 12.793135 |
| H | 9.711789  | 3.128394  | 14.174592 |
| H | -1.192507 | 0.180069  | -1.482339 |
| H | -1.665402 | 1.177902  | -0.100878 |
| H | -1.923935 | -0.568404 | -0.059594 |
| H | 2.110401  | -0.943206 | -2.188746 |
| H | 2.185109  | 0.820162  | -2.133305 |
| H | 0.646472  | 0.008885  | -2.452963 |

cis-10

38

scf done: -4484.921828

|   |           |           |          |
|---|-----------|-----------|----------|
| S | -0.166543 | -0.020699 | 0.161773 |
| C | -0.163834 | -0.100032 | 1.922658 |
| S | 1.449211  | -0.020772 | 2.628930 |
| C | 2.260376  | 0.476985  | 1.133516 |
| C | 1.528455  | 0.477018  | 0.015918 |
| C | -1.280131 | -0.233915 | 2.653723 |
| S | -1.288867 | -0.354671 | 4.412489 |
| C | -2.958956 | 0.229350  | 4.586035 |
| C | -3.722372 | 0.229385  | 3.420347 |
| S | -2.895810 | -0.354598 | 1.958787 |
| P | -5.379353 | 0.722161  | 3.196909 |

|   |            |          |           |
|---|------------|----------|-----------|
| C | -5.876391  | 1.069828 | 4.831051  |
| C | -5.112976  | 1.069792 | 5.996739  |
| S | -5.987383  | 1.478567 | 7.489627  |
| C | -7.387069  | 2.148857 | 6.653261  |
| S | -7.594325  | 1.478642 | 5.035925  |
| C | -8.222316  | 3.044185 | 7.200296  |
| S | -8.025414  | 3.675990 | 8.834024  |
| C | -9.233433  | 4.961592 | 8.661008  |
| C | -9.965353  | 4.961627 | 7.543410  |
| S | -9.641168  | 3.676066 | 6.366867  |
| C | -9.315071  | 5.907342 | 9.821354  |
| C | -11.061595 | 5.907422 | 7.154522  |
| P | -3.416385  | 0.722070 | 6.194241  |
| C | 3.709998   | 0.825268 | 1.291012  |
| C | 1.963475   | 0.825346 | -1.375820 |
| H | 4.175557   | 1.025203 | 0.327837  |
| H | 4.251052   | 0.002884 | 1.765979  |
| H | 3.827672   | 1.710234 | 1.920802  |
| H | 1.433230   | 1.710342 | -1.735363 |
| H | 1.744319   | 0.002998 | -2.061648 |
| H | 3.032455   | 1.025255 | -1.417610 |
| H | -10.137621 | 6.609868 | 9.701783  |
| H | -8.387760  | 6.476407 | 9.920894  |
| H | -9.470803  | 5.356833 | 10.752662 |
| H | -11.977544 | 5.356947 | 6.925039  |
| H | -10.782205 | 6.476510 | 6.264730  |
| H | -11.280718 | 6.609927 | 7.956332  |

triplet 10

38

scf done: -4484.859922

|   |           |           |           |
|---|-----------|-----------|-----------|
| S | -0.000646 | 0.010380  | 0.000281  |
| C | -0.000484 | 0.011437  | 1.738089  |
| S | 1.583301  | 0.010076  | 2.453349  |
| C | 2.475740  | 0.009014  | 0.938087  |
| C | 1.747616  | 0.009153  | -0.189560 |
| C | -1.160534 | 0.018224  | 2.487133  |
| S | -1.161016 | 0.006502  | 4.211261  |
| C | -2.900802 | 0.056807  | 4.431914  |
| C | -3.649156 | 0.056899  | 3.272947  |
| S | -2.732117 | 0.006738  | 1.778077  |
| P | -5.426773 | 0.137752  | 3.032405  |
| C | -5.895449 | -0.188948 | 4.726404  |



|   |            |           |           |
|---|------------|-----------|-----------|
| C | -5.149849  | -0.188910 | 5.881140  |
| S | -6.026901  | -0.558233 | 7.373732  |
| C | -7.633088  | -0.476132 | 6.666455  |
| S | -7.616700  | -0.558358 | 4.911526  |
| C | -8.761949  | -0.409858 | 7.395341  |
| S | -8.772177  | -0.374477 | 9.157343  |
| C | -10.493448 | 0.010986  | 9.308987  |
| C | -11.218617 | 0.010939  | 8.185883  |
| S | -10.372046 | -0.374580 | 6.679548  |
| C | -10.957752 | 0.281391  | 10.708755 |
| C | -12.685445 | 0.281287  | 8.033000  |
| P | -3.413042  | 0.137667  | 6.151049  |
| C | 3.969420   | 0.008837  | 1.075097  |
| C | 2.237407   | 0.009163  | -1.607290 |
| H | 4.451911   | 0.007366  | 0.100192  |
| H | 4.305008   | -0.874194 | 1.623327  |
| H | 4.305483   | 0.893135  | 1.620989  |
| H | 1.878235   | 0.893569  | -2.138081 |
| H | 1.875782   | -0.873759 | -2.138887 |
| H | 3.324490   | 0.007621  | -1.645850 |
| H | -12.036623 | 0.419154  | 10.748756 |
| H | -10.480759 | 1.180674  | 11.105770 |
| H | -10.696712 | -0.552302 | 11.365661 |
| H | -13.176691 | -0.552430 | 7.524761  |
| H | -12.851024 | 1.180557  | 7.434879  |
| H | -13.165893 | 0.419038  | 8.999818  |

closed-shell dicationic 10

38

scf done: -4484.349587

|   |           |           |           |
|---|-----------|-----------|-----------|
| S | 0.000034  | -0.000169 | -0.000036 |
| C | 0.000006  | -0.000312 | 1.720392  |
| S | 1.570417  | -0.000151 | 2.423519  |
| C | 2.465031  | -0.003078 | 0.928133  |
| C | 1.729167  | -0.000283 | -0.206713 |
| C | -1.170613 | -0.003831 | 2.479263  |
| S | -2.741208 | 0.059062  | 1.773136  |
| C | -3.658105 | 0.006417  | 3.250776  |
| C | -2.890003 | -0.038941 | 4.435026  |
| S | -1.166569 | -0.079613 | 4.200758  |
| P | -3.409263 | -0.059027 | 6.110721  |
| C | -5.150836 | -0.021996 | 5.901955  |
| C | -5.919215 | 0.005038  | 4.717334  |

|   |            |           |           |
|---|------------|-----------|-----------|
| S | -7.643244  | -0.009963 | 4.950591  |
| C | -7.638178  | -0.020851 | 6.673706  |
| S | -6.066887  | -0.019560 | 7.381003  |
| C | -8.808555  | -0.023830 | 7.433015  |
| S | -8.807999  | -0.098074 | 9.152031  |
| C | -10.537434 | -0.054814 | 9.360096  |
| C | -11.272685 | 0.012100  | 8.226809  |
| S | -10.378391 | 0.050783  | 6.733075  |
| C | -12.771436 | 0.041389  | 8.136508  |
| C | -11.062579 | -0.084870 | 10.764386 |
| P | -5.399825  | 0.034818  | 3.041796  |
| C | 3.961479   | -0.017499 | 1.022205  |
| C | 2.257302   | 0.017004  | -1.612525 |
| H | 3.143988   | -0.611812 | -1.688793 |
| H | 2.522024   | 1.035301  | -1.907096 |
| H | 1.518604   | -0.360456 | -2.319531 |
| H | 4.323599   | -1.024265 | 1.244205  |
| H | 4.313232   | 0.654105  | 1.806595  |
| H | 4.398087   | 0.309547  | 0.079816  |
| H | -13.185121 | 0.640558  | 8.947221  |
| H | -13.176763 | -0.970939 | 8.205339  |
| H | -13.104653 | 0.478003  | 7.195028  |
| H | -10.997729 | 0.905949  | 11.220595 |
| H | -10.497094 | -0.784123 | 11.381790 |
| H | -12.104339 | -0.401921 | 10.766854 |

open-shell dicationic 10

38

scf done: -4484.378979

|   |           |           |           |
|---|-----------|-----------|-----------|
| S | 0.000182  | -0.000887 | 0.000231  |
| C | 0.000166  | -0.000829 | 1.723812  |
| S | 1.571747  | -0.000373 | 2.431545  |
| C | 2.460247  | 0.000922  | 0.941135  |
| C | 1.723967  | 0.000352  | -0.197925 |
| C | -1.168163 | 0.002355  | 2.478979  |
| S | -1.150624 | 0.031051  | 4.208457  |
| C | -2.899329 | 0.015191  | 4.429672  |
| C | -3.657672 | -0.001508 | 3.256596  |
| S | -2.738069 | -0.014491 | 1.752815  |
| P | -5.392902 | -0.025734 | 3.048196  |
| C | -5.915077 | -0.023539 | 4.716238  |
| C | -5.156732 | -0.007069 | 5.889315  |
| S | -6.076326 | 0.005365  | 7.393102  |
| C | -7.646234 | -0.010935 | 6.666938  |

|   |            |           |           |
|---|------------|-----------|-----------|
| S | -7.663785  | -0.038900 | 4.937449  |
| C | -8.814558  | -0.007939 | 7.422119  |
| S | -8.814543  | -0.007398 | 9.145695  |
| C | -10.538348 | -0.009432 | 9.343884  |
| C | -11.274636 | -0.010525 | 8.204835  |
| S | -10.386143 | -0.009269 | 6.714414  |
| C | -12.773578 | -0.028139 | 8.134062  |
| C | -11.089289 | 0.006826  | 10.739694 |
| P | -3.421502  | 0.017277  | 6.097713  |
| C | 3.959179   | 0.018001  | 1.011824  |
| C | 2.275064   | -0.015762 | -1.593693 |
| H | 4.332117   | 1.040272  | 0.909726  |
| H | 4.377571   | -0.586792 | 0.207139  |
| H | 4.319799   | -0.383565 | 1.958657  |
| H | 1.558356   | 0.382536  | -2.311649 |
| H | 2.525183   | -1.037331 | -1.890976 |
| H | 3.178283   | 0.592441  | -1.645210 |
| H | -11.994186 | -0.598898 | 10.790666 |
| H | -11.336515 | 1.028782  | 11.038077 |
| H | -10.373618 | -0.394256 | 11.457146 |
| H | -13.146227 | -1.050351 | 8.237755  |
| H | -13.134225 | 0.371797  | 7.186553  |
| H | -13.192227 | 0.577847  | 8.937716  |

triplet dicationic 10

38

scf done: -4484.378345

|   |           |           |           |
|---|-----------|-----------|-----------|
| S | -0.006663 | -0.037989 | 0.000291  |
| C | -0.005740 | -0.013822 | 1.724008  |
| S | 1.566410  | 0.005760  | 2.430911  |
| C | 2.453704  | -0.010510 | 0.940347  |
| C | 1.716677  | -0.030826 | -0.198526 |
| C | -1.173359 | -0.013861 | 2.479618  |
| S | -2.743698 | -0.018972 | 1.752738  |
| C | -3.662393 | -0.014482 | 3.259267  |
| C | -2.904108 | -0.008537 | 4.430928  |
| S | -1.153473 | -0.016053 | 4.209933  |
| P | -3.425444 | 0.010362  | 6.098862  |
| C | -5.160651 | 0.020009  | 5.891208  |
| C | -5.918933 | 0.014305  | 4.719544  |
| S | -7.669570 | 0.022374  | 4.940528  |
| C | -7.649702 | 0.019384  | 6.670844  |
| S | -6.079356 | 0.023859  | 7.397735  |
| C | -8.817322 | 0.019194  | 7.426446  |

|   |            |           |           |
|---|------------|-----------|-----------|
| S | -10.389460 | -0.001557 | 6.719507  |
| C | -11.276778 | 0.015109  | 8.210034  |
| C | -10.539754 | 0.036238  | 9.348911  |
| S | -8.816484  | 0.044225  | 9.150152  |
| C | -11.090626 | 0.036555  | 10.744818 |
| C | -12.775813 | 0.020682  | 8.140571  |
| P | -5.397602  | -0.004788 | 3.051615  |
| C | 3.952762   | -0.016834 | 1.009937  |
| C | 2.267246   | -0.030779 | -1.594525 |
| H | -13.155713 | 1.041699  | 8.228805  |
| H | -13.189356 | -0.575642 | 8.954048  |
| H | -13.134407 | -0.396475 | 7.199738  |
| H | -10.376317 | 0.449398  | 11.456911 |
| H | -11.334328 | -0.982280 | 11.056530 |
| H | -11.997695 | 0.639678  | 10.787909 |
| H | 3.176112   | -0.631175 | -1.637296 |
| H | 2.507770   | 0.988471  | -1.907327 |
| H | 1.553994   | -0.446502 | -2.306038 |
| H | 4.332218   | -1.037863 | 0.919873  |
| H | 4.311423   | 0.398402  | 1.951585  |
| H | 4.366675   | 0.580833  | 0.197647  |

TS (changing axial and equatorial positions of P) in case of 9a  
40

scf done: -5404.838128

|    |           |           |           |
|----|-----------|-----------|-----------|
| S  | 6.007133  | 1.522662  | -0.107302 |
| C  | 5.113307  | 0.019525  | 0.127053  |
| S  | 6.009271  | -1.206878 | 1.023689  |
| C  | 7.302071  | -0.113877 | 1.548841  |
| C  | 7.300862  | 1.122842  | 1.036986  |
| C  | 3.872363  | -0.178721 | -0.346132 |
| S  | 2.981462  | -1.689972 | -0.131249 |
| C  | 1.403824  | -0.969442 | -0.487762 |
| C  | 1.402500  | 0.277668  | -0.994886 |
| S  | 2.971165  | 1.053701  | -1.240303 |
| P  | 0.000000  | 1.185001  | -1.723989 |
| Cl | 0.000000  | 2.897212  | -0.525155 |
| P  | 0.000000  | -2.059241 | -0.076582 |
| Cl | 0.000000  | -3.282430 | -1.785425 |
| C  | 8.286005  | -0.715679 | 2.507629  |
| C  | 8.282109  | 2.229028  | 1.291126  |
| C  | -1.402500 | 0.277668  | -0.994886 |
| C  | -1.403824 | -0.969442 | -0.487762 |
| S  | -2.981462 | -1.689972 | -0.131249 |

|   |           |           |           |
|---|-----------|-----------|-----------|
| C | -3.872363 | -0.178721 | -0.346132 |
| S | -2.971165 | 1.053701  | -1.240303 |
| C | -5.113307 | 0.019525  | 0.127053  |
| S | -6.009271 | -1.206878 | 1.023689  |
| C | -7.302071 | -0.113877 | 1.548841  |
| C | -7.300862 | 1.122842  | 1.036986  |
| S | -6.007133 | 1.522662  | -0.107302 |
| C | -8.286005 | -0.715679 | 2.507629  |
| C | -8.282109 | 2.229028  | 1.291126  |
| H | 9.102015  | -0.024845 | 2.724779  |
| H | 8.719334  | -1.631050 | 2.090475  |
| H | 7.797951  | -0.978036 | 3.451423  |
| H | 8.712755  | 2.585511  | 0.349840  |
| H | 9.099169  | 1.894029  | 1.931289  |
| H | 7.791923  | 3.078399  | 1.777151  |
| H | -9.102014 | -0.024845 | 2.724779  |
| H | -7.797951 | -0.978036 | 3.451423  |
| H | -8.719334 | -1.631050 | 2.090475  |
| H | -8.712755 | 2.585511  | 0.349840  |
| H | -7.791923 | 3.078399  | 1.777151  |
| H | -9.099169 | 1.894029  | 1.931289  |

**IVa-H<sub>4</sub>** geometry optimized at computed at B3LYP/6-31++G\*\* level of theory.

|   |           |           |           |
|---|-----------|-----------|-----------|
| C | -7.513900 | 0.669600  | -0.219300 |
| S | -5.971300 | 1.493300  | -0.438600 |
| C | -5.005300 | -0.000000 | -0.366800 |
| S | -5.971300 | -1.493300 | -0.438500 |
| C | -7.513900 | -0.669600 | -0.219300 |
| C | -3.657500 | -0.000000 | -0.278600 |
| S | -2.676100 | -1.485600 | -0.216800 |
| C | -1.339500 | -0.674200 | 0.622000  |
| C | -1.339500 | 0.674300  | 0.621900  |
| S | -2.676100 | 1.485600  | -0.216800 |
| C | 1.339500  | -0.674200 | 0.622000  |
| S | 2.676100  | -1.485600 | -0.216800 |
| C | 3.657500  | -0.000000 | -0.278600 |
| S | 2.676100  | 1.485600  | -0.216800 |
| C | 1.339500  | 0.674300  | 0.621900  |
| C | 5.005200  | -0.000000 | -0.366800 |
| S | 5.971300  | -1.493300 | -0.438500 |
| C | 7.513900  | -0.669600 | -0.219300 |
| C | 7.513900  | 0.669600  | -0.219300 |
| S | 5.971300  | 1.493300  | -0.438600 |
| H | 8.397000  | -1.288400 | -0.120500 |

|   |           |           |           |
|---|-----------|-----------|-----------|
| H | 8.397000  | 1.288400  | -0.120500 |
| H | -8.397000 | -1.288400 | -0.120500 |
| H | -8.397000 | 1.288400  | -0.120500 |
| S | 0.000000  | 1.641000  | 1.265700  |
| S | 0.000000  | -1.641000 | 1.265700  |

## References

- 1 D. D. Perrin, W. L. F. Armarego and D. R. Perrin, Purification of Laboratory Chemicals, *Pergamon Press Oxford*, 1988.
- 2 F. Wudl, M. L. Kaplan, E. J. Hufnagel and E. W. Southwick, Convenient synthesis of 1,4,5,8-tetrahydro-1,4,5,8-tetrathiafulvalene, *J. Org. Chem.*, 1974, **39**, 3608–3609.
- 3 K. Lincke, M. A. Christensen, F. Diederich and M. B. Nielsen, Acetylenic Tetrathiafulvalene Scaffolds - Intramolecular Charge-Transfer Molecules, *Helv. Chim. Acta*, 2011, **94**, 1743–1753.
- 4 F. Gerson, A. Lamprecht and M. Fourmigué, Oxidation of phosphines containing two or three tetrathiafulvalene (TTF) or o-dimethyl-TTF moieties. Evidence for formation of radical polycations, *J. Chem. Soc., Perkin Trans. 2*, 1996, 1409–1414.
- 5 H. J. Bestmann, J. Lienert and E. Heid, Reaktionen mit Phosphinalkylenen, XLI. Racematspaltung chiraler Phosphoniumsalze, *Chem. Ber.*, 1982, **115**, 3875–3879.
- 6 P. G. Chantrell, C. A. Pearce, C. R. Toyer and R. Twaits, Preparation of some novel diphosphorus compounds. I. 1,4-phenylene-diphosphorus compounds, *J. Appl. Chem.*, 1964, **14**, 563–564.
- 7 G. M. Sheldrick, *SHELXL-97: Program for the Refinement of Crystal Structures*, University of Göttingen, 1997.
- 8 G. M. Sheldrick, Phase annealing in SHELX-90: direct methods for larger structures, *Acta Crystallogr A Found Crystallogr*, 1990, **46**, 467–473.
- 9 G. M. Sheldrick, A short history of SHELX, *Acta Crystallogr A Found Crystallogr*, 2008, **64**, 112–122.
- 10 R. S. Stojanovic and A. M. Bond, Examination of conditions under which the reduction of the cobaltocenium cation can be used as a standard voltammetric reference process in organic and aqueous solvents, *Anal. Chem.*, 1993, **65**, 56–64.
- 11 Allen J. Bard, Larry R. Faulkner, *Electrochemical Methods. Fundamentals and Applications*, John Wiley & Sons, Inc., Department of Chemistry and Biochemistry, University of Texas at Austin, 2nd edn., 2000.
- 12 D. S. Polcyn and I. Shain, Multistep Charge Transfers in Stationary Electrode Polarography, *Anal. Chem.*, 1966, **38**, 370–375.
- 13 C. Wang, A. Ellern, J. Y. Becker and J. Bernstein, A unique molecular donor containing two tetrathiafulvalene (TTF) units fused to 1,4 - ditellurin: Synthesis, X-ray structure and cyclic voltammetry, *Tetrahedron Lett.*, 1994, **35**, 8489–8492.
- 14 J. Y. Becker, J. Bernstein, A. Ellern, H. Gershtenman and V. Khodorkovsky, The mystery of bis(tetrathiafulvalenyl)(TTF–TTF), *J. Mater. Chem.*, 1995, **5**, 1557–1558.

- 15 K. Lahlil, A. Moradpour, C. Bowlas, F. Menou, P. Cassoux, J. Bonvoisin, J.-P. Launay, G. Dive and D. Dehareng, Intervalence Transitions in Mixed Valence Bis(tetrathiafulvalene) Compounds, *J. Am. Chem. Soc.*, 1995, **117**, 9995–10002.
- 16 M. Fourmigue and Y. S. Huang, Evaluation of the extent of interaction within dimeric tetrathiafulvalenes (TTF) incorporating organometallic -Hg-, -SiMe<sub>2</sub>-, and -PPh- links, *Organometallics*, 1993, **12**, 797–802.
- 17 E. Aqad, J. Y. Becker, J. Bernstein, A. Ellern, V. Khodorkovsky and L. Shapiro, New  $\eta$ -electron donors containing two tetrathiafulvalene units fused to 1,4-dithiine and a conducting charge-transfer complex with tetracyanoquinodimethane, *J. Chem. Soc., Chem. Commun.*, 1994, 2775–2776.
- 18 N. Avarvari and M. Fourmigué, 1,4-Dihydro-1,4-diphosphinine fused with two tetrathiafulvalenes, *Chem. Commun.*, 2004, 2794–2795.
- 19 M. J. Frisch, G. W. Trucks, H. B. Schlegel, G. E. Scuseria, M. A. Robb, J. R. Cheeseman, G. Scalmani, V. Barone, G. A. Petersson, H. Nakatsuji, X. Li, M. Caricato, A. V. Marenich, J. Bloino, B. G. Janesko, R. Gomperts, B. Mennucci, H. P. Hratchian, J. V. Ortiz, A. F. Izmaylov, J. L. Sonnenberg, Williams, F. Ding, F. Lipparini, F. Egidi, J. Goings, B. Peng, A. Petrone, T. Henderson, D. Ranasinghe, V.G. Zakrzewski, J. Gao, N. Rega, G. Zheng, W. Liang, M. Hada, M. Ehara, K. Toyota, R. Fukuda, J. Hasegawa, M. Ishida, T. Nakajima, Y. Honda, O. Kitao, H. Nakai, T. Vreven, K. Throssell, J. A. Montgomery Jr., J. E. Peralta, F. Ogliaro, M. J. Bearpark, J. J. Heyd, E. N. Brothers, K. N. Kudin, V. N. Staroverov, T. A. Keith, R. Kobayashi, J. Normand, K. Raghavachari, A. P. Rendell, J. C. Burant, S. S. Iyengar, J. Tomasi, M. Cossi, J. M. Millam, M. Klene, C. Adamo, R. Cammi, J. W. Ochterski, R. L. Martin, K. Morokuma, O. Farkas, J. B. Foresman, D. J. Fox, *Gaussian 16 Rev. C.01*, 2016.
- 20 G. Schaftenaar and J. H. Noordik, Molden: a pre- and post-processing program for molecular and electronic structures, *J. Comput. Mol. Des.*, 2000, **14**, 123–134.
- 21 A. T. B. Gilbert, IQmol Molecular Viewer, Available at: <http://iqmol.Org>, 2012.
